# Supplementary material for: Genome-wide CRISPR screens of oral squamous cell carcinoma reveal fitness genes in the Hippo pathway
Source: eLife. 2020 Sep 29;9:e57761. doi: 10.7554/eLife.57761 (PMC7591259; doi:10.7554/eLife.57761)
Supplement: Figure 1—source data 1. [file elife-57761-fig1-data1.xlsx]

## Sheet: Figure 1A
Figure 1A - Number of MAGeCK hits - core fitness and non-core fitness genes
Cell line	No. of core fitness genes	No. of non-core fitness genes
ORL-48	979	147
ORL-115	843	137
ORL-136	952	136
ORL-150	968	198
ORL-153	928	136
ORL-174	1005	209
ORL-188	949	165
ORL-195	885	134
ORL-204	674	88
ORL-207	1051	191
ORL-214	922	194
ORL-215	1099	282
ORL-156	479	34
ORL-166	499	48
Ho-1-u-1	885	139
HSC-2	1022	162
HSC-4	1129	226
SAS	1079	238
BICR10	1159	220
PE/CA-PJ15	1051	166
SCC-9	839	115

## Sheet: Figure 1B
Figure 1B -
Categories	Number of genes
Non-fitness genes	15471
Fitness genes
Overlapping core fitness genes	1621
Non-core fitness genes	918

## Sheet: Figure 1C
Figure 1C -
Number of cell lines	Number of non-core fitness genes
1	366
2	163
3	86
4	65
5	40
6	38
7	27
8	27
9	16
10	20
11	15
12	9
13	10
14	7
15	11
16	6
17	5
18	4
19	2
20	0
21	1
