# Supplementary material for: Genome-wide CRISPR screens of oral squamous cell carcinoma reveal fitness genes in the Hippo pathway
Source: eLife. 2020 Sep 29;9:e57761. doi: 10.7554/eLife.57761 (PMC7591259; doi:10.7554/eLife.57761)
Supplement: Figure 2—source data 1. [file elife-57761-fig2-data1.xlsx]

## Sheet: Figure 2B
Figure 2B - CRISPR scores for 44 HNSCC cancer genes
Gene	ORL-48	ORL-115	ORL-136	ORL-150	ORL-153	ORL-156	ORL-166	ORL-174	ORL-188	ORL-195	ORL-204	ORL-207	ORL-214	ORL-215	BICR10	Ho-1-u-1	HSC-2	HSC-4	PE/CA-PJ15	SAS	SCC-9
AJUBA	0.112343	-0.00693256	0.119259	0.177774	0.318875	0.178572	0.111415	-0.0351109	0.226503	0.0956003	0.291468	0.0180889	0.318502	0.259467	0.0518969	0.0563484	0.290212	0.258521	0.137935	0.192663	0.223469
ARID1A	-0.077048	0.127602	0.012812	-0.0779015	-0.157027	0.10462	-0.586243	-0.0297428	-0.0831809	0.140621	0.211851	0.0494351	-0.186842	-0.0573048	0.0579372	-0.2885	-0.0940507	-0.0578457	-0.273237	-0.064945	-0.0481543
ARID2	-0.354126	-1.17533	-0.167282	-0.5256	-0.783728	-0.891167	-0.214617	-1.01277	-1.03783	-0.610231	-0.929114	-0.889756	-0.529616	-0.500041	-0.660704	-0.315253	-0.39002	-0.597863	-0.505048	-0.550141	-0.893279
ASXL1	0.258237	0.0986046	0.135681	0.10932	0.141227	0.0637796	0.0344541	-0.0863908	0.129484	0.234665	0.474398	0.327013	0.0482096	0.193991	-0.0199219	0.181091	0.317368	0.128441	0.0451876	0.0736477	-0.000895016
B2M	0.139846	0.0410387	0.0916127	0.192313	-0.061342	0.221916	0.228035	0.168355	0.0676931	0.136162	0.00355987	-0.0596816	0.0416157	0.0721315	-0.00445089	0.110854	0.0816588	0.0386612	0.203114	0.0507414	-0.0211071
CASP8	0.250296	0.0232095	0.0940202	0.231793	0.496335	0.2159	0.360149	0.268132	0.698322	0.230633	0.297108	0.111954	0.369024	1.04105	0.10029	0.386915	0.0525919	0.196939	0.271042	0.321733	0.203463
CDKN2A	0.2046	0.0600537	0.100168	-0.00917215	-0.00518988	0.0198934	0.179143	0.0149559	0.0251582	0.0485225	0.0160706	0.103221	0.0949452	0.120031	0.226269	-0.0344184	0.0576703	-0.0112696	0.273211	0.0760532	0.051946
CTCF	-1.51889	-1.31095	-1.65298	-1.4347	-1.15427	-1.20517	-0.843052	-1.84248	-1.35571	-1.63675	-0.779848	-1.66249	-1.59314	-1.68851	-1.60969	-1.47107	-1.78055	-1.48128	-1.57617	-1.63434	-1.32356
CUL3	-0.597396	-1.0998	-0.827943	-0.630327	-1.26118	-0.654198	-1.55606	-0.691194	-0.897669	-1.02807	-1.01078	-0.570744	-0.912949	-0.994493	-0.791036	-0.964992	-0.825363	-0.395526	-1.09683	-0.560408	-0.366658
CYLD	-0.0478395	-0.185222	-0.275435	-0.088496	0.165996	-0.513248	-0.427755	-0.21732	0.130901	0.0371635	-0.0922463	-0.184876	0.143588	0.0169939	0.043323	-0.191576	-0.155817	-0.308707	-0.0886014	-0.0569177	0.0104568
EP300	0.212598	0.672589	-0.0841572	0.131052	-0.0394859	-0.031539	-0.173358	0.0556686	0.234921	0.103457	0.408835	0.23337	0.0185352	0.112064	0.186039	0.00310034	-0.101883	0.0895133	0.0903847	0.0763735	0.26785
EPHA2	0.0851525	0.149383	-0.189464	0.25622	0.181544	-0.153203	0.0991645	-0.132028	0.217744	0.11357	0.141679	0.0804365	0.0251753	-0.0374579	0.138923	0.00513286	-0.055629	0.126839	0.120733	0.00221765	0.0862665
FAT1	0.0562851	0.148769	-0.0636298	0.0547988	-0.162188	0.190519	-0.041932	-0.0983086	0.135068	0.0255507	-0.0156881	-0.0172686	-0.0370931	0.0416405	0.0956026	0.0562392	0.0429234	0.0119745	-0.0584724	0.129047	-0.0347622
FBXW7	-0.0446669	0.157452	-0.34486	-0.0569809	0.0399684	0.0501182	-0.464223	-0.192864	0.23793	-0.0381253	0.159595	0.104742	0.0174465	-0.842117	-0.0719636	-0.571914	0.0453012	0.047611	0.0955026	-0.480696	0.291257
FGFR3	-0.171418	0.0588572	0.0442485	0.240073	0.0128149	0.0614416	0.17405	0.0847475	0.0326093	0.0517811	-0.162317	0.0866443	-0.14619	0.166809	0.131033	0.0188679	0.0366567	0.0708904	0.000643168	0.00684408	0.00289294
FLNA	-0.00799628	0.108432	0.208087	0.010328	0.0518215	-0.093347	0.0792643	0.0586014	0.104538	0.0929794	0.0219582	0.0961625	-0.0498914	0.171097	0.117252	0.00409493	0.0942042	0.0285904	-0.0169402	-0.034958	0.108685
FOSL2	0.0963069	0.0773546	0.0848187	0.00267586	-0.0534625	0.0989827	0.0786358	0.0306163	0.0345394	0.0198787	0.0183431	0.1409	0.0409884	-0.0228894	-0.0352788	-0.12808	0.0573758	0.0627056	-0.00583918	0.117121	0.027861
HLA-A	-0.0353783	-0.13207	-0.365537	-0.081343	-0.1487	-0.0636247	-0.176356	-0.345982	-0.0212628	-0.275104	-0.439516	-0.0593834	-0.205211	-0.188223	-0.237328	-0.280792	-0.0511232	0.053339	-0.21868	-0.162319	-0.125576
HLA-B	-0.0659671	-0.252257	-0.136126	-0.0489839	-0.332872	-0.0403976	-0.235425	-0.338008	-0.159155	-0.503829	-0.222154	-0.122614	-0.179666	0.0139034	-0.0244854	-0.23084	-0.141292	-0.16756	-0.0437815	-0.312868	-0.189588
HRAS	0.00743035	-0.0545581	0.105757	-0.0266058	0.0594626	0.227291	0.089699	0.0550908	-0.052845	0.0226684	-0.0153336	-0.106775	-0.457732	0.127614	-0.08694	-0.024474	-0.0432258	0.131769	0.0202378	0.0771907	-0.0353071
HUWE1	-0.630193	-0.531054	-0.492915	-0.439578	-0.409715	-1.08387	-0.186409	-0.870845	-0.399477	-1.24846	-0.489471	-0.973391	-0.324948	-0.523546	-0.210274	-0.938387	-0.453326	-0.585245	-0.471515	0.0592852	-0.168167
KDM6A	0.0426314	0.196985	0.0211189	-0.000190754	0.196475	-0.078263	0.0635776	-0.0585303	0.100972	0.0169788	0.163023	0.0840318	-0.0266115	0.0344499	0.058727	0.125894	0.0621645	0.0841375	0.0481636	0.108498	-0.0104531
KEAP1	0.590101	0.355916	-0.235471	0.275587	0.246496	0.167412	-0.113387	-0.435727	-0.209187	-0.0457369	0.265649	0.110043	0.519457	-0.891869	0.0772185	-0.382871	0.165396	0.357852	-0.171962	0.0314555	0.0698588
KMT2B	-0.251118	-0.152949	-0.027971	-0.25671	-0.326751	-0.0458497	-0.214508	-0.0662564	-0.457908	-0.305869	-0.128602	-0.193946	-0.134832	-0.0972409	-0.0886844	-0.0644066	-0.138081	-0.108941	-0.149243	-0.310595	-0.175428
KMT2D	-0.128284	-0.024494	-0.445484	0.00942635	0.0941922	-0.141287	-0.615478	-0.355581	0.128948	-0.268513	-0.406211	-0.163789	-0.335423	-0.477258	-0.196105	-0.249335	-0.00365741	-0.192197	-0.0400118	-0.377905	-0.209922
KRT5	0.117595	-0.0484901	0.0539598	-0.0162158	-0.143012	0.0450978	0.166332	-0.133628	-8.83e-05	0.0643303	0.0805515	0.102152	0.115906	0.0829056	-0.0011833	-0.000162347	0.114331	0.138592	0.122919	0.0779546	0.078763
MAPK1	-0.444737	-0.0688719	-0.51513	-0.270997	-0.261228	-0.069152	-0.400469	-0.917456	-0.292291	-0.363449	-0.228629	-0.649866	-0.476293	-0.331417	-0.419351	-0.462917	-0.24205	-0.556393	-0.225938	-1.16493	-0.0768076
MYH9	-1.39982	-0.455047	-0.800714	-1.02343	0.162496	-0.923933	-0.897278	-1.06949	-0.0227886	-1.35522	-0.683558	-1.06103	-0.579939	-1.35228	-1.5479	-0.494015	-0.33561	-0.740785	-1.04591	-0.657932	-0.527248
NF2	0.490331	0.0191797	0.0983522	0.361262	0.598294	0.143594	0.38238	0.0583242	0.3361	9.49e-05	0.241606	0.383963	0.356205	0.132106	0.357682	-0.0738895	0.416054	-0.130557	0.136615	-0.0225861	0.329947
NFE2L2	-0.166482	-0.388307	-0.0609807	-0.245555	-0.385044	-0.582295	-0.353584	-0.0797992	-0.346657	-0.18389	-0.759439	-0.253298	-0.230221	-0.100582	-1.06537	-0.710312	-0.195708	-0.0151231	-0.345745	-0.0690477	-0.273285
NOTCH1	0.155226	0.141146	0.230948	0.25181	0.116424	0.131812	0.150534	0.0570223	0.103376	0.0870923	0.0964338	0.0555971	0.26204	0.119456	0.144674	0.103176	0.0378443	0.13897	0.27002	0.0809921	0.0500632
NOTCH2	0.106504	0.238482	-0.00112524	0.188935	0.136465	0.200963	0.100588	0.0358708	0.206487	0.0991156	-0.0801344	0.214021	-0.10466	0.0842476	-0.0134484	0.010996	0.231656	-0.0932683	0.0471167	0.0252871	0.0937216
NSD1	0.0402465	0.0111345	-0.00326678	0.278729	0.158267	0.157702	0.137392	0.0705256	0.0729757	0.0935175	0.0877661	0.21942	0.0795736	0.299389	0.0883676	0.0431961	0.157433	0.152528	0.0679429	-0.00705689	0.194462
PIK3CA	-0.454524	-1.21072	-0.412241	-1.32528	-0.911077	-1.06073	-0.403211	-0.262007	-1.03743	-0.633467	-0.380306	-0.399277	-0.411056	0.00892754	-0.625244	-0.505486	-1.09805	-0.0669644	-0.575704	-0.0678176	-0.508429
POM121L12	-0.0640139	-0.0733227	-0.0685488	0.0623629	-0.0303001	-0.0292963	-0.0790696	0.0311583	-0.0219797	0.0881639	-0.114606	-0.0958597	-0.114682	-0.121052	0.0425486	-0.000772504	-0.0353595	-0.0846655	0.0525901	-0.106209	-0.097619
PTEN	0.262205	0.150219	-0.206129	0.17425	0.240657	0.416239	-0.00810257	-0.0136804	0.415316	0.284962	0.162439	0.184005	0.123727	-0.44876	-0.0595224	-0.0279158	0.10273	-0.0323478	-0.0288129	0.423388	0.161033
RAC1	-1.98262	-1.40588	-0.802281	-1.77663	-1.92195	-1.06055	-0.772919	-1.01613	-1.45421	-1.3503	-1.4988	-1.25063	-1.59147	-1.04484	-1.94686	-1.16483	-0.786965	-0.497552	-0.805004	-0.370536	-0.93979
RASA1	0.0148784	0.373812	-0.0684168	0.461687	0.258638	-0.250742	0.110203	-0.0597089	0.659428	0.211619	0.375984	0.266265	0.0332391	0.0583836	0.142926	0.128398	0.0577446	0.240095	0.0492123	0.133725	0.278403
RB1	0.0351197	-0.169202	-0.111906	0.0957474	0.0396836	0.117116	-0.0725489	0.00433034	0.123595	0.0117879	0.107409	-0.038662	0.218288	0.0104237	-0.0940726	-0.195705	-0.116398	0.0684222	-0.110479	-0.0805313	0.0893483
RHOA	-0.667282	0.832894	0.314763	-0.156322	0.348945	-0.467476	-0.232088	0.393884	-0.78863	-0.125644	-0.248383	-0.809746	-0.277279	-0.0134901	-0.360389	0.212951	-0.467598	0.0187814	-0.233724	0.144524	-0.0331804
SMAD4	-0.0224906	0.0986088	0.146981	-0.172516	0.165859	-0.00472717	0.140793	-0.262992	-0.221276	0.132169	0.0773427	-0.075242	0.145794	0.148459	-0.34429	-0.462183	-0.0210351	-0.00962104	0.00497148	-0.40181	0.209996
TGFBR2	0.230145	0.101487	0.296914	-0.110443	0.0673066	0.380672	-0.0630059	0.121692	0.0854929	0.0823728	0.212796	0.184072	0.205074	-0.220983	0.0963183	-0.00592928	0.0879941	0.138976	0.0234688	0.0559651	-0.0389265
TP53	0.06213	0.156644	0.0784928	0.148186	-0.0446353	0.138107	0.137821	0.0246495	0.0453924	0.15587	0.016418	0.0503001	-0.00783289	0.0834542	-0.0171491	0.00452549	-0.0195218	0.135626	0.0493171	0.103983	0.169092
ZNF750	0.0986142	0.039346	0.0730772	0.0649026	0.0696561	0.0345512	0.0687461	-0.0524754	0.111612	-0.0041409	-0.0203647	-0.0462224	0.0719891	-0.0787273	-0.028649	-0.0530115	-0.026334	0.178253	0.240621	0.0330449	0.0561551

## Sheet: Figure 2C
Figure 2C - CRISPR scores for 43 genes with driver mutations
	TP53	CDKN2A	PIK3CA	FAT1	HLA-B	CASP8	NFE2L2	CBLC	DDX3X	FRG1	HLA-A	PMS2	PTEN	VHL	WRAP53	ARID1B	ARID2	ASXL1	CREBBP	DCC	DHX15	DLC1	EPHA2	FANCA	FXR1	HRAS	KANSL1	KEAP1	KMT2C	NOTCH1	OGG1	PABPC1	PALB2	RAD54B	RASA1	RBM5	RICTOR	SMARCE1	SPTAN1	TNPO2	TP63	UPF3B	ZFP36L1
ORL-48	0.06213	0.2046	-0.45452	0.056285	-0.06597	0.250296	-0.16648	-0.00316	-0.05361	-0.24358	-0.03538	0.008664	0.262205	-0.72693	-0.28076	0.117903	-0.35413	0.258237	0.497521	0.031617	-1.83922	0.105215	0.085152	-0.10528	0.140986	0.00743	-1.07753	0.590101	0.042271	0.155226	0.142924	-0.56775	-0.0915	-0.07582	0.014878	-0.24902	-0.40085	-0.45751	-0.05326	0.107249	0.042526	-0.10934	-0.81738
ORL-115	0.156644	0.060054	-1.21072	0.148769	-0.25226	0.023209	-0.38831	-0.1284	0.027326	-0.18281	-0.13207	0.098779	0.150219	-0.29914	-0.05979	0.151874	-1.17533	0.098605	0.212389	-0.05851	-2.6664	0.066364	0.149383	-0.13725	0.170645	-0.05456	-1.11547	0.355916	0.000125	0.141146	0.156841	-0.22331	-0.26828	-0.06515	0.373812	-0.14966	-0.60871	-0.47417	-0.31753	0.039795	-0.61301	-0.15584	-0.3737
ORL-136	0.078493	0.100168	-0.41224	-0.06363	-0.13613	0.09402	-0.06098	0.009379	-0.23997	-0.16386	-0.36554	-0.0705	-0.20613	-1.29523	-0.14694	-0.03177	-0.16728	0.135681	0.036243	0.015822	-1.7735	0.094923	-0.18946	0.005108	-0.098	0.105757	-1.29153	-0.23547	0.090219	0.230948	0.111109	-0.7499	0.219299	-0.04597	-0.06842	0.009401	-0.68363	-0.57857	-0.10477	-0.04849	-0.42927	-0.1202	0.079055
ORL-150	0.148186	-0.00917	-1.32528	0.054799	-0.04898	0.231793	-0.24556	-0.03474	-0.20203	-0.22368	-0.08134	0.13138	0.17425	-0.48755	-0.28178	-0.0308	-0.5256	0.10932	0.477944	0.001091	-2.12354	0.126709	0.25622	-0.03602	0.095435	-0.02661	-0.84706	0.275587	-0.04187	0.25181	0.222601	-0.355	-0.02672	-0.12009	0.461687	-0.34387	-0.53057	-0.82706	-0.04337	0.208006	-0.45269	0.022436	-0.75048
ORL-153	-0.04464	-0.00519	-0.91108	-0.16219	-0.33287	0.496335	-0.38504	-0.093	-0.24755	-0.279	-0.1487	0.021015	0.240657	-0.92232	-0.06903	0.104504	-0.78373	0.141227	0.634127	-0.03034	-1.32779	0.093442	0.181544	-0.11717	0.086822	0.059463	-0.79504	0.246496	0.080537	0.116424	0.145595	-0.40687	-0.32425	-0.16364	0.258638	-0.17907	-0.27282	-0.38843	-0.17189	0.096263	-0.56106	-0.24962	-0.81623
ORL-156	0.138107	0.019893	-1.06073	0.190519	-0.0404	0.2159	-0.58229	-0.04965	-0.5482	-0.11215	-0.06362	-0.02587	0.416239	-0.71282	-0.15824	0.136642	-0.89117	0.06378	-0.19943	0.169578	-2.46831	0.021415	-0.1532	0.046511	0.092408	0.227291	-0.92144	0.167412	-0.16993	0.131812	0.137686	-1.0853	-0.00184	-0.09676	-0.25074	-0.3547	-0.3195	-0.62009	-0.03214	0.069471	-0.17228	0.133044	-0.74814
ORL-166	0.137821	0.179143	-0.40321	-0.04193	-0.23543	0.360149	-0.35358	-0.07213	0.078639	-0.00833	-0.17636	-0.08727	-0.0081	-0.16131	-0.25086	0.05133	-0.21462	0.034454	-0.5945	-0.09714	-2.47945	0.133861	0.099165	-0.12659	-0.05554	0.089699	-1.00564	-0.11339	-0.06104	0.150534	0.198177	-0.80147	-0.46171	-0.43115	0.110203	-1.20778	0.10542	-0.483	-0.27358	0.006374	-0.37747	-0.40213	-1.21949
ORL-174	0.02465	0.014956	-0.26201	-0.09831	-0.33801	0.268132	-0.0798	-0.06168	-0.03691	-0.24189	-0.34598	0.237883	-0.01368	-0.56499	-0.33252	-0.02371	-1.01277	-0.08639	0.097498	0.064356	-1.60232	0.093126	-0.13203	-0.32602	0.070331	0.055091	-0.82043	-0.43573	-0.00155	0.057022	0.07473	-0.67683	0.122796	-0.09296	-0.05971	-0.1952	0.079015	-0.57229	-0.2877	-0.01779	-0.06106	-0.24662	-0.32019
ORL-188	0.045392	0.025158	-1.03743	0.135068	-0.15915	0.698322	-0.34666	-0.03696	-0.18498	-0.32907	-0.02126	0.051485	0.415316	-0.73063	-0.13329	0.023149	-1.03783	0.129484	0.28261	0.016315	-1.99213	0.111253	0.217744	-0.29402	0.037675	-0.05284	-0.53029	-0.20919	0.138933	0.103376	0.084845	-0.86018	-0.15952	-0.24121	0.659428	-0.06822	-0.41751	-0.73488	-0.04516	0.102492	-0.63164	0.126008	-0.84843
ORL-195	0.15587	0.048522	-0.63347	0.025551	-0.50383	0.230633	-0.18389	-0.03603	-0.00866	-0.3335	-0.2751	0.063258	0.284962	-0.90635	-0.09521	0.072052	-0.61023	0.234665	0.168582	-0.01333	-2.01684	0.129514	0.11357	0.011077	-0.06363	0.022668	-0.68025	-0.04574	0.10669	0.087092	0.153024	-0.52144	0.150158	-0.09384	0.211619	-0.12351	-0.29992	-0.37403	-0.02905	0.146952	-0.39995	0.050649	-0.25499
ORL-204	0.016418	0.016071	-0.38031	-0.01569	-0.22215	0.297108	-0.75944	-0.15403	-0.40374	-0.06499	-0.43952	0.127876	0.162439	-1.08114	-0.13021	0.106931	-0.92911	0.474398	0.132606	0.087491	-2.3622	0.167935	0.141679	-0.24486	-0.06627	-0.01533	-0.59187	0.265649	0.031191	0.096434	-0.00693	-0.99389	-0.10451	-0.27718	0.375984	-0.26774	-0.11154	-0.4689	-0.20319	0.035012	-0.30265	-0.12702	-0.14237
ORL-207	0.0503	0.103221	-0.39928	-0.01727	-0.12261	0.111954	-0.2533	-0.05504	-0.0293	-0.24868	-0.05938	0.10989	0.184005	-0.49415	-0.15841	0.112622	-0.88976	0.327013	0.243823	-0.10037	-2.00997	0.127067	0.080437	-0.2047	0.137488	-0.10677	-0.937	0.110043	0.105071	0.055597	0.085228	-0.45637	-0.19824	-0.27666	0.266265	-0.37259	-0.14844	-0.73127	-0.27015	0.046654	-0.2857	-0.34396	-0.24529
ORL-214	-0.00783	0.094945	-0.41106	-0.03709	-0.17967	0.369024	-0.23022	-0.12006	-0.30304	-0.24317	-0.20521	0.11741	0.123727	-0.24498	-0.30075	0.086753	-0.52962	0.04821	0.594078	0.121438	-1.80035	0.247783	0.025175	-0.29961	-0.17169	-0.45773	-0.86488	0.519457	0.00778	0.26204	0.00941	-0.78593	-0.21044	0.037813	0.033239	-0.01381	-0.30961	-0.6045	-0.22969	-0.03416	0.181057	-0.24083	-0.31755
ORL-215	0.083454	0.120031	0.008928	0.04164	0.013903	1.04104	-0.10058	-0.07421	-0.07009	-0.50184	-0.18822	0.053728	-0.44876	-0.56389	-0.4435	0.101491	-0.50004	0.193991	0.062226	0.143632	-1.94107	0.139071	-0.03746	-0.01995	-0.21923	0.127614	-1.03832	-0.89187	0.000755	0.119456	0.063414	-0.75134	-0.24421	-0.16735	0.058384	0.060896	-0.10668	-0.64632	-0.21365	0.05697	0.033711	-0.09941	-0.7205
BICR10	-0.01715	0.226269	-0.62524	0.095603	-0.02449	0.10029	-1.06537	0.061804	0.016867	-0.23657	-0.23733	-0.11415	-0.05952	-0.55306	-0.32379	0.023053	-0.6607	-0.01992	0.311	-0.04375	-1.89323	0.029971	0.138923	-0.36753	0.045943	-0.08694	-0.55826	0.077218	0.007763	0.144674	-0.0341	-0.50883	-0.10452	-0.02283	0.142926	-0.10417	-0.91492	-0.54636	-0.12133	-0.06398	0.011831	-0.06483	-0.38271
Ho-1-u-1	0.004525	-0.03442	-0.50549	0.056239	-0.23084	0.386915	-0.71031	-0.0442	-0.06607	-0.19653	-0.28079	0.030539	-0.02792	-0.92798	-0.24908	-0.02536	-0.31525	0.181091	-0.14151	0.023954	-1.88683	0.088759	0.005133	-0.15779	0.118707	-0.02447	-0.51127	-0.38287	-0.12484	0.103176	0.049292	-1.08135	-0.10319	-0.2378	0.128398	-0.18517	-0.47726	-0.79538	-0.2528	0.031406	-0.47764	-0.05985	-0.0539
HSC-2	-0.01952	0.05767	-1.09805	0.042923	-0.14129	0.052592	-0.19571	-0.17116	-0.3717	-0.14242	-0.05112	0.234499	0.10273	-1.05826	-0.31362	0.104698	-0.39002	0.317368	0.197776	0.010106	-1.42978	0.040537	-0.05563	-0.14686	0.155555	-0.04323	-1.14245	0.165396	-0.19136	0.037844	-0.03207	-0.90171	0.144636	-0.09955	0.057745	-0.18007	-0.17268	-0.57698	-0.11729	-0.02642	-0.45147	-0.27666	0.005441
HSC-4	0.135626	-0.01127	-0.06696	0.011974	-0.16756	0.196939	-0.01512	-0.05685	-0.36212	-0.50593	0.053339	0.219003	-0.03235	-1.03326	-0.40248	0.013359	-0.59786	0.128441	-0.00412	0.110314	-1.88103	0.110085	0.126839	-0.09839	0.11207	0.131769	-0.49914	0.357852	0.076768	0.13897	-0.02536	-0.53401	0.161783	-0.19559	0.240095	-0.19749	-0.5118	-0.63142	-0.1016	0.107652	-0.36007	0.042132	-0.1191
PE/CA-PJ15	0.0493171	0.273211	-0.575704	-0.0584724	-0.0437815	0.271042	-0.345745	-0.03403	-0.0250188	-0.475834	-0.21868	0.120278	-0.0288129	-0.967561	-0.254267	0.0775983	-0.505048	0.0451876	0.217681	0.0183267	-1.79026	0.100631	0.120733	-0.235278	0.163625	0.0202378	-0.403746	-0.171962	-0.0318953	0.27002	0.00365681	-0.797463	0.217527	-0.0088018	0.0492123	-0.183574	-0.205668	-0.571103	-0.151364	-0.0056395	0.143192	-0.295661	-0.255031
SAS	0.103983	0.0760532	-0.0678176	0.129047	-0.312868	0.321733	-0.0690477	-0.0167078	-0.230153	-0.249246	-0.162319	0.0785846	0.423388	-0.815698	-0.349933	0.0680953	-0.550141	0.0736477	-0.0936187	0.0100453	-1.88149	0.0384688	0.00221765	-0.130847	-0.118046	0.0771907	-0.466189	0.0314555	0.0733307	0.0809921	-0.0125478	-0.732017	-0.275631	-0.0641258	0.133725	-0.0080196	-0.539261	-0.522878	-0.141621	0.0705559	-0.464179	-0.12579	-0.16753
SCC-9	0.169092	0.051946	-0.50843	-0.03476	-0.18959	0.203463	-0.27328	-0.07484	-0.21255	-0.30893	-0.12558	0.184978	0.161033	-0.5711	-0.13135	0.078986	-0.89328	-0.0009	0.111403	0.053253	-2.30055	0.118394	0.086267	-0.15248	-0.13228	-0.03531	-0.71653	0.069859	-0.04445	0.050063	-0.06089	-0.43899	-0.25608	0.019843	0.278403	0.022096	-0.28235	-0.5596	-0.12722	0.026059	-0.26145	-0.31757	-0.28667

## Sheet: Figure 2D
Figure 2D - KEGG pathway enrichment analysis of 110 genes
p-value	q-value	pathway	- logQ	source	external_id	members_input_overlap	members_input_overlap_geneids
0.000168227	0.0104301	Fanconi anemia pathway	1.98171	KEGG	path:hsa03460	ERCC4; UBE2T; FANCD2; SLX4	2177; 2072; 29089; 84464
0.000433962	0.0134528	Renal cell carcinoma	1.87119	KEGG	path:hsa05211	FLCN; RAPGEF1; SOS1; GAB1	6654; 201163; 2889; 2549
0.0013901	0.0287288	NF-kappa B signaling pathway	1.54168	KEGG	path:hsa04064	TRIM25; NFKB2; TNFAIP3; CSNK2A1	7706; 4791; 1457; 7128
0.0046332	0.0718146	Dopaminergic synapse	1.14379	KEGG	path:hsa04728	PPP2R5E; ARRB2; GNAQ; PPP2R5C	409; 2776; 5527; 5529
0.00846101	0.0973467	Glycosphingolipid biosynthesis - lacto and neolacto series	1.01168	KEGG	path:hsa00601	B3GNT5; B3GNT2	84002; 10678
0.010527	0.0973467	Gap junction	1.01168	KEGG	path:hsa04540	GNAQ; SOS1; TUBA3D	2776; 113457; 6654
0.0109908	0.0973467	Hepatocellular carcinoma	1.01168	KEGG	path:hsa05225	GAB1; SOS1; SMARCD1; BAK1	578; 6602; 2549; 6654
0.0229645	0.154147	Sphingolipid signaling pathway	0.812064	KEGG	path:hsa04071	PPP2R5E; GNAQ; PPP2R5C	2776; 5527; 5529
0.0234734	0.154147	Neurotrophin signaling pathway	0.812064	KEGG	path:hsa04722	RAPGEF1; SOS1; GAB1	2889; 2549; 6654
0.0330594	0.154147	Estrogen signaling pathway	0.812064	KEGG	path:hsa04915	HSP90AB1; GNAQ; SOS1	2776; 3326; 6654
0.033678	0.154147	Insulin signaling pathway	0.812064	KEGG	path:hsa04910	EIF4E2; RAPGEF1; SOS1	9470; 2889; 6654
0.0352705	0.154147	PI3K-Akt signaling pathway	0.812064	KEGG	path:hsa04151	HSP90AB1; PPP2R5E; EIF4E2; SOS1; PPP2R5C	5527; 6654; 3326; 5529; 9470
0.0359806	0.154147	Endometrial cancer	0.812064	KEGG	path:hsa05213	SOS1; BAK1	578; 6654
0.038177	0.154147	Adrenergic signaling in cardiomyocytes	0.812064	KEGG	path:hsa04261	PPP2R5E; GNAQ; PPP2R5C	2776; 5527; 5529
0.0401949	0.154147	Breast cancer	0.812064	KEGG	path:hsa05224	NFKB2; SOS1; BAK1	578; 4791; 6654
0.0415699	0.154147	Gastric cancer	0.812064	KEGG	path:hsa05226	BAK1; SOS1; GAB1	2549; 578; 6654
0.0422662	0.154147	mTOR signaling pathway	0.812064	KEGG	path:hsa04150	FLCN; EIF4E2; SOS1	9470; 201163; 6654
0.0454854	0.156672	Non-small cell lung cancer	0.805009	KEGG	path:hsa05223	SOS1; BAK1	578; 6654

## Sheet: Figure 2E
Figure 2E - Tractability of 918 non-core fitness genes
Tractability bucket	Number of non-core fitness genes
Bucket 1	33
Bucket 2	7
Bucket 3	5
Bucket 4	145
Bucket 5	19
Bucket 6	21
Bucket 7	25
Bucket 8	21
Bucket 9	276
Bucket 10	366

## Sheet: Figure 2 - figure supplement 1B
Figure 2 - figure supplement 1B
KEGG pathway	-log10 Q
Chronic myeloid leukemia	5.7
TNF signaling pathway	4.5
Renal cell carcinoma	3.7
Shigellosis	3.6
Small cell lung cancer	3.6
Hepatitis C	3.6
Pancreatic cancer	3.6
Apoptosis	3.6
Osteoclast differentiation	3.6
Prostate cancer	3.6

## Sheet: Figure 2 - figure supplement 1C
Figure 2 - figure supplement 1C
PANTHER protein class	Group 1	Group 2	Group 3
transferase	0.444444	0.175439	0.100418
oxidoreductase	0.407407	0.0614035	0.0376569
hydrolase	0.111111	0.175439	0.0962343
receptor	0.0740741	0.0614035	0.0167364
ligase	0.037037	0.0438596	0.041841
signaling molecule	0.037037	0.0438596	0.0251046
calcium-binding protein	0.037037	0.00877193	0.0125523
chaperone	0.037037	0.0175439	0.0209205
isomerase	0.037037	0.0350877	0.0125523
lyase	0	0.0350877	0.0167364
cell adhesion molecule	0	0.0350877	0.0125523
transfer/carrier protein	0	0.0263158	0.0292887
membrane traffic protein	0	0.0175439	0.0543933
cytoskeletal protein	0.037037	0.0526316	0.0585774
transporter	0	0.0438596	0.0669456
enzyme modulator	0	0.0964912	0.0920502
Others	0	0.0175439	0.0543933
transcription factor	0.037037	0.140351	0.16318
nucleic acid binding	0.0740741	0.307018	0.351464
Classified	27	114	239
Not classified	18	96	424
Total	45	210	663
%	40	45.7143	63.9517
