# Supplementary material for: Genome-wide CRISPR screens of oral squamous cell carcinoma reveal fitness genes in the Hippo pathway
Source: eLife. 2020 Sep 29;9:e57761. doi: 10.7554/eLife.57761 (PMC7591259; doi:10.7554/eLife.57761)
Supplement: Figure 3—source data 1. [file elife-57761-fig3-data1.xlsx]

## Sheet: Figure 3A
Figure 3A - CRISPR scores for plotting heatmap
Gene	ORL-48	ORL-115	ORL-136	ORL-150	ORL-153	ORL-156	ORL-166	ORL-174	ORL-188	ORL-195	ORL-204	ORL-207	ORL-214	ORL-215	BICR10	Ho-1-u-1	HSC-2	HSC-4	PE/CA-PJ15	SAS	SCC-9
YAP1	-0.758765	-0.457145	-0.44469	-0.204558	-0.455883	-1.72167	-1.21168	-0.223349	-0.199065	-0.119101	-1.11453	-1.06755	-0.367621	-0.794008	-0.479627	-0.0542107	-0.595148	-0.100147	0.031118	-0.78575	-1.17578
WWTR1	-0.175441	-0.289952	-0.108601	-0.32115	-1.25596	-0.557393	-0.146912	-0.39161	-1.0266	-0.902411	-0.170036	-0.253816	-0.69886	-0.650777	-0.481048	-0.258656	-0.370162	-0.0306057	-0.80629	-0.0112689	-0.52806
PIK3CA	-0.454524	-1.21072	-0.412241	-1.32528	-0.911077	-1.06073	-0.403211	-0.262007	-1.03743	-0.633467	-0.380306	-0.399277	-0.411056	0.00892754	-0.625244	-0.505486	-1.09805	-0.0669644	-0.575704	-0.0678176	-0.508429
TP63	0.0425264	-0.613006	-0.429268	-0.452694	-0.561065	-0.172281	-0.377472	-0.0610598	-0.631637	-0.399949	-0.30265	-0.285702	0.181057	0.0337108	0.0118308	-0.477636	-0.45147	-0.360069	0.143192	-0.464179	-0.261455
SOX2	0.0325261	-0.184378	-0.0225864	-0.0750029	-0.178558	-0.130636	0.0345115	-0.0353632	-0.0770056	-0.318173	0.0857819	-0.127687	-0.0358312	-0.0943564	0.0566829	-0.11099	0.027629	-0.00201167	-0.0739384	-0.0879668	-0.102724

## Sheet: Figure 3C
Figure 3C - Co-competition assay raw data
n (biological replicates) = 2
ORL-48 Cas9	%BFP-positive cells relative to day 4
	Day 4		Day 8		Day 12		Day 15		Day 18
PLK1	100	100	58.9	68.4	44.6	50.4	32.4	35.6	23.2	28.7
CHAT	100	100	98.9	101.4	94.2	94.1	90.7	91.1	86.9	88
NT	100	100	104.5	102.1	104.1	102.6	103.7	101	100.3	99.9
Y1K	100	100	70	75	54.9	57.8	45.2	45	39.1	34.8
Y2B	100	100	77.9	81.3	60.1	64	50.2	48.5	39.5	33.0363
W1K	100	100	102	99.7	98.3	97.1	96.7	93.3	93.2	92.5
W2B	100	100	103.4	101.793	100	98.5	95.1	93.5	93.5	87.9
ORL-204 Cas9	%BFP-positive cells relative to day 4
	Day 6		Day 8		Day 12		Day 15		Day 18
PLK1	100	100	68.3	72	43.2	40.6	34.5	33.2	32	31.8
CHAT	100	100	97.2	105.6	85.9	94.7	79.1	87.9	76.9	78.3
NT	100	100	102.6	102.7	96.6	100.6	94.8	102	94.3	100
Y1K	100	100	88.2	82.7	66.9	66.2	56.7	57.3	46	51.9
Y2B	100	100	82	81.7	54	70.8	47.5	61.6	36.5	62.1
W1K	100	100	100.4	100.5	91.2	95.3	84.9	91.1	81.2	87.3
W2B	100	100	99.5	96.5	93.1	93.2	86.3	89.2	83.4	86.1
ORL-214 Cas9	%BFP-positive cells relative to day 4
	Day 4		Day 8		Day 12		Day 15		Day 18
PLK1	100	100	30	25.7	19.4	13.9	15.2	12.2	13.5	16.3
CHAT	100	100	86.4	92.7	75.4	77.5	72.2	69.8	72.4	65.1
NT	100	100	109.1	103.1	109.7	101.9	104.3	101.1	99.8	97
Y1K	100	100	88.2	92.2	79.1	82.4	74.5	80	71.3	75.3
Y2B	100	100	95.3	98.3	79.4	98.2	82.5	84.4	77	81
W1K	100	100	50.4	70.6	34.9	40.5	18.8	29.9	14.9	17.2
W2B	100	100	73.1	69.7	81.7	32.1	27.3	26.5	25.4	23.7
PE/CA-PJ15 Cas9	%BFP-positive cells relative to day 4
	Day 4		Day 8		Day 12		Day 15		Day 18
PLK1	100	100	72.8	60.2	56.7	54.9	43.4	42.7	36.5	35.2
CHAT	100	100	100.7	88.3	113.7	96.7	107.2	90.6	99.5	84
NT	100	100	104	101	117	111.9	113.8	107.4	103.6	102.1
Y1K	100	100	100	106.9	106.2	107.2	98.5	100.9	93.3	95.5
Y2B	100	100	99.3	105.1	99.6	104	93.2	96.2	89.5	92.3
W1K	100	100	83.4	95.476	82.2	76.1605	63	49.7443	43.5	34
W2B	100	100	97.7	98.2	90.3	84.6	70.7	64.9	59	50.9
BICR10 Cas9	%BFP-positive cells relative to day 4
	Day 4		Day 8		Day 12		Day 15		Day 18
PLK1	100	100	73.5	73.0422	66.4	65.1958	67.6	59.5482	63.2	59.2
CHAT	100	100	101.6	104.972	99.9	105.649	99.9	104.061	102.8	104.6
NT	100	100	104.9	106.195	104.2	108.078	105.5	109.026	109.3	109.2
Y1K	100	100	101.6	100.744	100.4	102.221	100	99.9256	102.2	101
Y2B	100	100	100.9	100.428	100.2	99.2	100.2	98	99.5	97
W1K	100	100	99.9	96.9655	94.6	93.2276	88.2	77.5724	80.4	73.2
W2B	100	100	96	95.084	93.1	88.9	86.4	81.6	81.8	74.6
HSC2 Cas9	%BFP-positive cells relative to day 4
	Day 4		Day 8		Day 12		Day 15		Day 18
PLK1	100	100	84.9	67.1	71.6	48.5	57.1	34.4	49.1	25.4
CHAT	100	100	108.3	105.9	104.6	106	103.3	103.5	99.4	106.2
NT	100	100	104.2	106.9	105.3	106.6	103.8	105.2	102.2	108
Y1K	100	100	102.3	102	101.4	100.6	96.1	94.6	92	93.5
Y2B	100	100	101.8	103.3	100.3	101.1	98	97.5	95.3	95.7
W1K	100	100	100.1	102.8	96.4	98.4	87.6	89.6	74.7	88.9
W2B	100	100	99.9	101.5	95.3	97.1	88.5	90.7	80.4	85.4

## Sheet: Figure 3D
Figure 3D - qPCR raw data
n (biological replicates) = 2
ORL-48 Cas9	Log2 Fold Change
	CTGF		CYR61
NT	0	0.02	0	0
Y1K	-0.58	-0.3	-0.4	-0.58
Y2B	-0.88	-0.28	-0.68	-0.58
W1K	0.13	0.37	0.1	-0.04
W2B	0.06	0.34	0.06	-0.02
ORL-204 Cas9	Log2 Fold Change
	CTGF		CYR61
NT	0	0	0	0
Y1K	-1.27	-1.53	-0.81	-1.01
Y2B	-1.92	-2.74	-1.13	-1.56
W1K	-0.22	-0.72	0.21	-0.5
W2B	-0.07	-0.28	0.22	-0.13
ORL-214 Cas9	Log2 Fold Change
	CTGF		CYR61
NT	0.01	0.01	0.01	0.01
Y1K	-0.83	-0.6	-0.27	-0.96
Y2B	-0.41	-0.37	-0.44	-0.35
W1K	-2.73	-2.95	-2.44	-2.05
W2B	-2.07	-1.98	-1.47	-1.66
PE/CA-PJ15 Cas9	Log2 Fold Change
	CTGF		CYR61
NT	0	0	0	0.01
Y1K	-0.21	-0.45	-0.07	0.02
Y2B	0.06	-0.31	0.25	0.34
W1K	-1.22	-1.51	-0.63	-0.67
W2B	-1.21	-1.52	-0.45	-0.36

## Sheet: Figure 3 - figure supplement 1A
Figure 3 - figure supplement 1A
Chromosome	% of screened genes
	Without CRISPRcleanR correction	With CRISPRcleanR correction
3q25-29	16.4	14.3
5p13-15	15.3	15.3
7p11	94.1	29.4
8q22-24	22.2	15.9
11q13	72	20
11q22	40.4	13.5

## Sheet: Figure 3 - figure supplement 1B
Figure 3 - figure supplement 1B
Chromosome	No. of genes screened	Non-fitness genes	Fitness genes	% of fitness genes
1	1774	1520	254	14.3179
2	1126	970	156	13.8544
3	975	837	138	14.1538
4	671	587	84	12.5186
5	800	685	115	14.375
6	930	785	145	15.5914
7	791	692	99	12.5158
8	599	519	80	13.3556
9	665	574	91	13.6842
10	652	562	90	13.8037
11	1014	849	165	16.2722
12	927	795	132	14.2395
13	291	255	36	12.3711
14	529	439	90	17.0132
15	503	430	73	14.5129
16	727	584	143	19.6699
17	1026	839	187	18.2261
18	247	211	36	14.5749
19	1249	1072	177	14.1713
20	505	430	75	14.8515
21	202	176	26	12.8713
22	390	324	66	16.9231
X	701	621	80	11.4123
Y	23	22	1	4.34783

## Sheet: Figure 3 - figure supplement 2A
Figure 3 - figure supplement 2A
KEGG pathway	-log10 Q
Small cell lung cancer	2.40475
Ribosome	2.14031
RNA transport	1.98375
Hippo signaling pathway	1.80233
Focal adhesion	1.80233
Hepatitis C	1.80233
Cellular senescence	1.788
Protein export	1.72247
ErbB signaling pathway	1.72247
Human cytomegalovirus infection	1.72247

## Sheet: Figure 3 - figure supplement 2D
Figure 3 - figure supplement 2D
With amplification
	YAP1	WWTR1	PIK3CA	TP63	SOX2
ORL-156	-2.21325	-0.62603	-1.31221	-0.10103	-0.04425
ORL-207	-1.46409	-0.24592	-0.46368	-0.29365	-0.0571
ORL-215	-1.03822	-0.82973	0.130571	0.166647	-0.01977
ORL-153	-0.54874	-1.77342	-1.2455	-0.70974	-0.12423
ORL-188	-0.15956	-1.37553	-1.39144	-0.79518	0.019791
ORL-195	-0.02767	-1.17199	-0.7791	-0.43795	-0.31849
PE-CA-PJ15	0.183619	-1.08714	-0.73723	0.35369	0.024197
ORL-214	-0.39036	-0.86915	-0.45314	0.402742	0.089235
ORL-174	-0.17905	-0.43185	-0.23713	0.064786	0.103393
ORL-150	-0.16547	-0.33911	-1.83453	-0.53501	0.027476
Without amplification
	YAP1	WWTR1	PIK3CA	TP63	SOX2
SCC-9	-1.58831	-0.63437	-0.60546	-0.24172	-0.00795
ORL-207	-1.46409	-0.24592	-0.46368	-0.29365	-0.0571
ORL-166	-1.47268	-0.05262	-0.39444	-0.36011	0.189342
ORL-204	-1.40353	-0.09185	-0.38387	-0.27602	0.263422
SAS	-1.04791	0.129083	0.043145	-0.55921	0.012524
ORL-48	-1.02063	-0.13582	-0.55914	0.194807	0.179638
ORL-136	-0.50875	-0.02474	-0.46202	-0.48654	0.099127
HSC-2	-0.75848	-0.41135	-1.53441	-0.5368	0.202407
BICR10	-0.59068	-0.59286	-0.81444	0.164503	0.233424
ORL-115	-0.52468	-0.28281	-1.61483	-0.75015	-0.13008
HSC-4	-0.03518	0.068883	0.014476	-0.42412	0.111671
Ho-1-u-1	0.061585	-0.23952	-0.60306	-0.56204	-0.02204

## Sheet: Figure 3 - figure supplement 2E
Figure 3 - figure supplement 2E - Baseline mRNA expressions of YAP1 and WWTR1 relative to OKF6
n (biological replicates) = 2
	Log2 Fold Change
	YAP1		WWTR1
ORL-48	47.2	30	8.3	6.1
ORL-204	4.3	3.6	1	0.9
ORL-214	1.7	1.2	7.8	6
PE/CA-PJ15	0.5	0.4	6.9	6.2
BICR10	1.3	0.7	3.7	2.7
HSC-2	1.8	1.6	7.7	8.4

## Sheet: Figure 3 - figure supplement 3A
Figure 3 - figure supplement 3A
	YAP1_gene expression	WWTR1_gene expression	Differential essentiality (YAP1 CRISPR score - WWTR1 CRISPR score)
SIDM00565	440.49	8.29	-2.01421
SIDM00861	101.245	4.52	-1.44356
SIDM01168	44.15	6.79	-1.44323
SIDM00492	22.07	3.68	-1.24099
SIDM00957	60.08	2.16	-1.22497
SIDM00833	58.99	0.21	-1.17169
SIDM00540	33.18	4.94	-1.1651
SIDM00944	48.14	0.195	-1.03762
SIDM00139	30.42	3.01	-1.00234
SIDM00260	103.96	3.11	-0.930893
SIDM00341	22.95	2	-0.928346
SIDM00602	28.72	0.05	-0.899829
SIDM00244	23.46	0.05	-0.882078
SIDM00194	28.84	0.27	-0.871685
SIDM01233	61.7133	9.24	-0.776361
SIDM00677	35.75	0.01	-0.755092
SIDM00750	33.725	3.46	-0.754502
SIDM00052	1225.3	15.34	-0.754256
SIDM00127	558.95	6.86	-0.717491
SIDM00986	29.265	6.78	-0.714796
SIDM01088	32.5	4.39	-0.710516
SIDM00305	41.55	5.69	-0.633241
SIDM00193	19.585	0.405	-0.622913
SIDM01146	32.68	0.37	-0.621324
SIDM00118	57.93	0.47	-0.609748
SIDM00351	29.71	8.05	-0.596783
SIDM01145	12.45	0.01	-0.572737
SIDM00332	17.385	5.805	-0.565924
SIDM00383	87.34	11.48	-0.565002
SIDM00090	56.955	2.44	-0.563687
SIDM00630	12.6	3.635	-0.557668
SIDM00241	24.95	3.17	-0.548067
SIDM01197	26.2833	0.02333	-0.537376
SIDM00156	71.07	7.36	-0.536731
SIDM00782	28.535	1.085	-0.520362
SIDM00837	43.79	1.19	-0.516997
SIDM00841	51.65	1.535	-0.478405
SIDM01041	56.22	8.91	-0.463521
SIDM00956	42.79	4.93	-0.460536
SIDM00172	32.38	11.16	-0.449887
SIDM00899	34.085	5.68	-0.41717
SIDM00198	46.64	8.06	-0.412669
SIDM00415	0	0.01	-0.411996
SIDM00151	33.88	39.81	-0.409898
SIDM00359	44.43	0.22	-0.409735
SIDM00885	63.4	4.77333	-0.401222
SIDM00768	25.86	11.495	-0.397123
SIDM00043	49.33	9.77	-0.394884
SIDM01163	77.58	9.91	-0.383489
SIDM00850	40.645	2.885	-0.359776
SIDM00872	80.335	7.295	-0.339937
SIDM01141	20.79	6.72	-0.32722
SIDM00472	37.07	7.85	-0.306572
SIDM00789	36.9233	1.61	-0.302245
SIDM00589	51.82	9.38	-0.295595
SIDM00680	37.64	2.67	-0.280742
SIDM00839	16.765	1.755	-0.27418
SIDM00539	27.15	3.85	-0.260277
SIDM00334	18.44	5.5	-0.258313
SIDM01246	4.67	3.13	-0.256135
SIDM00373	22.75	9.04	-0.2394
SIDM01171	29.48	9.685	-0.234472
SIDM00572	31.505	3.405	-0.232804
SIDM01080	21.455	3.995	-0.224051
SIDM01072	48.43	11.1	-0.219889
SIDM00272	26.685	2.765	-0.217423
SIDM00045	6.62	0.1	-0.213355
SIDM00148	7.08	1.32	-0.212618
SIDM00375	32.71	6.99	-0.203148
SIDM00498	35.025	8.255	-0.201915
SIDM00530	36.52	4.15	-0.19802
SIDM00826	35.26	2.23	-0.197004
SIDM00115	64.09	6.51	-0.196258
SIDM00969	45.61	86.74	-0.19373
SIDM00528	12.2967	4.10667	-0.188513
SIDM00250	12.85	3.72	-0.183506
SIDM00527	60.0033	12.6767	-0.182022
SIDM00629	24.105	10.16	-0.179339
SIDM01097	3.61	5.48	-0.178413
SIDM00453	44.11	2.85	-0.1677
SIDM01155	33.64	14.06	-0.167086
SIDM00201	14.89	5.73	-0.166171
SIDM00933	47.18	9.77	-0.165888
SIDM00386	26.95	6.655	-0.165763
SIDM00954	36.82	7.25	-0.161121
SIDM00303	55.38	13.97	-0.159712
SIDM00745	42.575	7.925	-0.155819
SIDM00537	19.825	1.35	-0.155635
SIDM00128	35.58	6.61	-0.150311
SIDM01051	32.88	8.405	-0.148469
SIDM01026	61.5	4.855	-0.145093
SIDM00210	45.055	8.715	-0.144952
SIDM00566	22.1	8.86	-0.143133
SIDM01090	24.8	6.21333	-0.141222
SIDM00573	38.41	23.22	-0.138391
SIDM00209	23.97	9.27	-0.137284
SIDM00898	26.45	5.73	-0.127739
SIDM00207	32.92	22.52	-0.123507
SIDM00462	0.105	0.405	-0.122422
SIDM00399	33.33	10.44	-0.121476
SIDM00259	0.15	0.14	-0.115162
SIDM00371	45.54	22.0967	-0.114411
SIDM00316	41.015	29.4	-0.112483
SIDM01169	26.7	10.51	-0.104425
SIDM00930	26.63	6.82	-0.104229
SIDM00446	0.205	0.03	-0.0969743
SIDM01032	39.89	2.74	-0.0954593
SIDM00157	2.14	2.29	-0.0861642
SIDM00716	23.615	1.305	-0.0831904
SIDM00548	24.15	7.68	-0.0820489
SIDM00187	16.65	23.7	-0.0786727
SIDM00253	0.03	0.09	-0.0752994
SIDM00273	28.46	7.33	-0.0745389
SIDM00762	18.19	4.415	-0.0674806
SIDM00783	42.63	11.16	-0.0628346
SIDM00290	18.095	3.605	-0.0621352
SIDM01042	18.595	4.52	-0.0573255
SIDM01101	14.415	6.32	-0.0543075
SIDM00300	20.43	3.74	-0.0537638
SIDM00150	13.25	1.45	-0.0526415
SIDM00255	0.06	0.02	-0.0519013
SIDM00137	15.35	7.97	-0.0517377
SIDM01170	30.995	8.76	-0.0473299
SIDM00358	48.715	6.235	-0.0434197
SIDM00918	19.3	6.43	-0.0426389
SIDM00554	61.585	17.285	-0.0399763
SIDM00196	17.62	3.31	-0.0395077
SIDM00460	0.01	0.015	-0.0387686
SIDM00423	0.05	0.08	-0.0340052
SIDM01229	0.22	0.41	-0.02989
SIDM00419	13.99	5.355	-0.0294307
SIDM00504	23.72	20.41	-0.0236529
SIDM01100	3.58	0.085	-0.0225752
SIDM01043	31.8	18.5	-0.0222151
SIDM00146	38.92	11.98	-0.020886
SIDM01098	10.19	6.06	-0.0205481
SIDM00942	26.17	14.23	-0.0120502
SIDM00556	0.17	0.12	-0.0109163
SIDM00608	2.955	0.33	-0.00917399
SIDM00389	0.08	0.075	-0.00904623
SIDM00138	39.6	7.11	-0.00839498
SIDM00690	49.35	8.58	-0.00633755
SIDM00320	0.175	0.045	-0.00619622
SIDM00406	0.12667	0.06333	-0.00581594
SIDM01028	126.6	15.13	-0.00157806
SIDM00340	1.96	0.385	0.000860475
SIDM00132	33.06	13.855	0.00463037
SIDM01027	44.54	9.095	0.00532822
SIDM00261	18.16	5.01	0.00580182
SIDM00353	26.12	8.125	0.0107949
SIDM00263	7.21	10.3	0.0112104
SIDM00444	9.3	7.76	0.0162301
SIDM00205	11.75	5.93	0.0168377
SIDM00352	14.15	14.96	0.0177232
SIDM00669	36.34	9.47	0.0185195
SIDM00574	49.1	17.67	0.0196232
SIDM00591	18.76	18.9	0.0233657
SIDM01024	37.845	6.765	0.0257874
SIDM01055	26.71	14.96	0.0283248
SIDM00753	19.3	13.53	0.0369615
SIDM00489	29.12	22.92	0.0384954
SIDM00379	35.18	11.13	0.0395151
SIDM01029	17.29	8.91	0.041241
SIDM00577	0.24	4.63	0.0421248
SIDM00541	56.69	2.63	0.0425907
SIDM00040	32.49	5.52	0.0506838
SIDM00264	19.55	5.7	0.0514626
SIDM00875	31.405	8.955	0.0532108
SIDM01031	40.17	8.595	0.0534695
SIDM00967	36.49	12.25	0.0534721
SIDM00477	30.18	11.31	0.0560866
SIDM00312	0.08	0.075	0.0636251
SIDM00738	31.7	9.01	0.0637701
SIDM00225	41.66	54.6	0.063779
SIDM00349	24.65	15.08	0.0657693
SIDM00257	2.79	0.08	0.0659649
SIDM01025	35.5	6.34	0.0663022
SIDM01130	11.72	5.705	0.0677842
SIDM00457	0.3	0.065	0.0701493
SIDM01220	31.34	48.56	0.074367
SIDM01147	25.975	8.615	0.0756725
SIDM00628	35.365	11.88	0.0780533
SIDM00819	19.56	42.67	0.0811822
SIDM00095	27.66	24.7	0.0822367
SIDM00490	13.88	15.11	0.0831886
SIDM00254	45.27	7.95	0.0939427
SIDM01099	0.17	0.07	0.0996555
SIDM00581	16.26	4.95	0.102621
SIDM00324	0.02	0.03	0.106301
SIDM00091	39.85	19.855	0.113181
SIDM01081	19.47	7.86	0.113598
SIDM00758	12.39	13.89	0.116112
SIDM00708	30.14	18.18	0.117919
SIDM00182	55.47	8.56	0.123634
SIDM00596	31.59	17.84	0.127325
SIDM00583	39.96	29.03	0.127777
SIDM00382	30.62	12.27	0.129854
SIDM00651	0.115	0.05	0.13307
SIDM00326	20.985	15.35	0.145228
SIDM00571	35.31	17.05	0.146244
SIDM00588	25.32	9.76	0.148684
SIDM00842	8.3	16.06	0.15151
SIDM00077	35.34	14.95	0.153444
SIDM00347	20.3	11.39	0.154344
SIDM01050	42.15	10.74	0.154696
SIDM00551	20.98	11.49	0.157275
SIDM00538	15.75	16.64	0.161003
SIDM00910	28.775	7.065	0.170971
SIDM00884	24.275	25.94	0.175237
SIDM00155	21.73	11.75	0.178145
SIDM00044	31.42	9.49	0.203412
SIDM00718	29.25	17.76	0.214005
SIDM00133	27.075	7.675	0.223562
SIDM00270	19.12	11.07	0.227417
SIDM00686	19.215	9.82	0.227813
SIDM00649	29.38	14.865	0.229718
SIDM00354	25.36	16.73	0.233297
SIDM00465	37.07	27.75	0.234735
SIDM00673	27.05	32.27	0.235209
SIDM00950	32.31	31.79	0.236455
SIDM00512	22.5	18.98	0.244154
SIDM00325	16.2	5	0.245055
SIDM01186	12.385	7.32	0.246363
SIDM00803	14.3	51.735	0.251601
SIDM00866	18.13	21.8	0.264341
SIDM00759	22.285	11.545	0.268335
SIDM00455	40.58	12.1	0.273713
SIDM00120	31.86	10.95	0.291324
SIDM01112	13.34	10.92	0.294005
SIDM00237	26.11	11.51	0.29724
SIDM00604	15.28	12.87	0.29967
SIDM00042	22.58	17.67	0.311859
SIDM00606	26.26	16.38	0.317245
SIDM00478	9.7	4.14	0.336866
SIDM00212	22.77	19.81	0.338032
SIDM00968	37.9	17.74	0.338649
SIDM00278	14.34	6.68	0.342206
SIDM00607	24.16	26.5	0.344192
SIDM01124	57.26	34.67	0.344582
SIDM00998	12.57	12.72	0.345114
SIDM00564	18.37	70.81	0.360314
SIDM00083	14.37	9.135	0.367925
SIDM00982	40.62	7.54	0.377687
SIDM00321	30.78	25.04	0.38044
SIDM00469	19.68	31.535	0.381507
SIDM00598	8.92	9.68	0.386258
SIDM01037	26.725	11.95	0.396558
SIDM01068	25.25	7.14	0.397829
SIDM00947	48.95	39.93	0.402945
SIDM00339	34.605	15.67	0.404776
SIDM00483	44.86	14.55	0.467801
SIDM00645	32.155	12.44	0.498511
SIDM00082	11.675	44.025	0.516401
SIDM00684	13.125	30.955	0.526883
SIDM00208	29.36	76.4	0.528978
SIDM00797	19.66	38.98	0.53403
SIDM00903	14.835	18.865	0.53791
SIDM00501	25.02	10.84	0.558539
SIDM00612	35.1	80.34	0.565628
SIDM00344	18.76	29.425	0.576205
SIDM00763	29.9	33.825	0.617583
SIDM00874	32.19	17.01	0.637411
SIDM00575	34.51	62.15	0.661456
SIDM01044	17.595	13.83	0.671494
SIDM00867	21.94	32.4	0.679327
SIDM00335	11.29	12.13	0.70932
SIDM00105	17.79	15.6	0.739965
SIDM00111	19.18	43.89	0.76868
SIDM01052	42.57	49.29	0.826941
SIDM00799	13.1	33.755	0.900615
SIDM00675	28.935	49.875	1.12728
SIDM00486	22.365	50.255	1.60266
SIDM01103	22.37	24.22	1.82178

## Sheet: Figure 3 - figure supplement 3B
Figure 3 - figure supplement 3B
Cell lines	WWTR1 CRISPR Score	WWTR1 gene expression (RPKM)
OSC-20	0.00215979	8.29
ES-2	0.0544944	4.52
SW626	-0.0758366	6.79
AM-38	0.11184	3.68
COLO-678	0.343995	2.16
SW837	0.0734191	0.21
DOK	-0.0390329	4.94
CL-11	0.200396	0.195
NCI-H226	-0.0359976	3.01
MKN28	-0.0356884	3.11
LOU-NH91	-0.238002	2
IM-95	0.0496007	0.05
NB69	-0.0430386	0.05
SNU-61	0.113958	0.27
C2BBe1	-0.0273383	9.24
LS-513	0.130861	0.01
NCI-H1568	-0.126057	3.46
HCE-4	0.179599	15.34
JHU-022	0.0403993	6.86
BHY	-0.309229	6.78
RL95-2	-0.164673	4.39
JHOS-2	-0.40131	5.69
SNU-81	0.168393	0.405
SNU-1	0.00700336	0.37
HCC2998	-0.012895	0.47
SAS	0.0267915	8.05
SNU-16	-0.0017537	0.01
MFM-223	0.095512	5.805
SCH	-0.0210808	11.48
OVCAR-8	-0.145799	2.44
MDA-MB-415	0.106104	3.635
OCUB-M	0.152117	3.17
SNU-C1	0.00661467	0.02333
NB7	-0.0498145	7.36
T84	0.171872	1.085
SW48	0.106262	1.19
SW620	0.0604155	1.535
FLO-1	-0.072073	8.91
COLO-680N	-0.11271	4.93
BB30-HNC	0.0660305	11.16
AsPC-1	0.0193798	5.68
EW-16	-0.147967	8.06
ROS-50	0.14476	0.01
IGROV-1	-0.0631313	39.81
RCM-1	-0.0439527	0.22
HCC1187	0.105401	4.77333
NCI-H1869	-0.10326	11.495
PCI-4B	-0.000289575	9.77
SW1573	-0.111366	9.91
AGS	-0.0766359	2.885
HCC1954	-0.136962	7.295
OV-90	-0.113607	6.72
PEO1	-0.631617	7.85
HCT-15	0.0696299	1.61
HSC-3	-0.133828	9.38
LS-180	0.088017	2.67
LoVo	0.0822899	1.755
ESO26	-0.00691464	3.85
MFE-296	0.100264	5.5
MC-IXC	0.0930685	3.13
SNG-M	0.0823312	9.04
T98G	-0.111504	9.685
NUGC-3	0.087348	3.405
SCC-9	-0.236629	3.995
HCC-15	-0.0894774	11.1
MDA-MB-453	0.123622	2.765
HSC-39	-0.0173721	0.1
MCF7	0.116637	1.32
SKN-3	0.0528486	6.99
SNU-C5	0.128431	8.255
KYAE-1	-0.0226646	4.15
COLO-205	0.0619119	2.23
PCI-6A	0.146768	6.51
DOV13	-0.475324	86.74
MDA-MB-361	-0.0330432	4.10667
TE-4	-0.120017	3.72
MDST8	-0.273784	12.6767
MDA-MB-436	-0.0467596	10.16
SK-PN-DW	0.0767849	5.48
PA-TU-8988T	-0.087018	2.85
SW1088	-0.164301	14.06
EW-7	0.10934	5.73
CAL-51	-0.371846	9.77
MHH-ES-1	0.0106987	6.655
COLO-824	0.143976	7.25
JHOS-4	-0.202221	13.97
NCI-H1650	-0.201937	7.925
GP5d	0.000201623	1.35
JHU-011	-0.456188	6.61
EFO-27	0.0123268	8.405
KYSE-510	-0.0464284	4.855
A2780	0.107177	8.715
OSC-19	-0.734401	8.86
RKO	-0.0420821	6.21333
no-11	-0.0479909	23.22
D-423MG	-0.151874	9.27
AU565	-0.0819025	5.73
D-542MG	-0.0409723	22.52
OCI-AML3	0.170127	0.405
SCC90	0.123518	10.44
NB10	0.0431178	0.14
SUIT-2	-0.101862	22.0967
YH-13	-0.184654	29.4
TOV-21G	-0.0513834	10.51
CAL-72	-0.0706166	6.82
OCI-AML2	0.0836233	0.03
KYSE-140	-0.0210423	2.74
KP-N-YS	0.0768893	2.29
NCI-H2170	-0.0118637	1.305
LK-2	0.0879176	7.68
LB1047-RCC	-0.580628	23.7
NB6	0.087614	0.09
GI-1	-0.0951065	7.33
NCI-H1944	-0.0990416	4.415
HCT-116	-0.00665751	11.16
HGC-27	-0.0568657	3.605
EVSA-T	0.0546934	4.52
SK-N-AS	-0.0254694	6.32
LC-1-sq	-0.074827	3.74
KM12	-0.0150371	1.45
NB17	0.177358	0.02
NCI-H3122	0.00242369	7.97
TOV-112D	0.0278311	8.76
RERF-GC-1B	-0.183179	6.235
Caov-4	-0.759043	6.43
KURAMOCHI	-0.135922	17.285
EW-22	0.0225744	3.31
OCI-LY-19	0.00970867	0.015
SU-DHL-8	0.0417708	0.08
BE2-M17	-0.0965438	0.41
TC-71	0.0223131	5.355
MOG-G-UVW	-0.123896	20.41
SK-N-DZ	0.127148	0.085
ESS-1	-0.0755344	18.5
MDA-MB-231	-0.11492	11.98
SK-N-SH	0.243103	6.06
CAL-33	0.0489254	14.23
KP-N-YN	0.0323495	0.12
KMS-11	0.0114574	0.33
SU-DHL-10	-0.0382969	0.075
NCI-H23	-0.153526	7.11
JHU-029	-0.10887	8.58
VMRC-LCD	0.0627424	0.045
SU-DHL-5	0.127878	0.06333
KYSE-410	0.0244974	15.13
LP-1	0.102286	0.385
BxPC-3	-0.115666	13.855
KYSE-450	-0.027063	9.095
ES8	0.112958	5.01
RKN	-0.328115	8.125
ES5	-0.0820761	10.3
OACM5-1	-0.108564	7.76
EW-1	0.0290413	5.93
RMG-I	-0.254958	14.96
HPAF-II	-0.0793394	9.47
no-10	-0.0907333	17.67
HO-1-u-1	0.0640331	18.9
KYSE-70	-0.0675071	6.765
GAMG	-0.245303	14.96
NCI-H2023	-0.126766	13.53
Ca9-22	-0.135323	22.92
SK-MG-1	-0.333559	11.13
KYSE-270	-0.166951	8.91
NH-12	-0.144054	4.63
HT55	0.0100893	2.63
TMK-1	-0.0641831	5.52
ES4	-0.332167	5.7
HCC1806	-0.270416	8.955
KYSE-150	-0.0106242	8.595
OVCA420	-0.182507	12.25
OE33	-0.0984534	11.31
L-363	0.0527871	0.075
NCI-H1755	-0.177171	9.01
IST-MEL1	-0.0758596	54.6
TE-10	-0.00903722	15.08
NB13	0.0889494	0.08
KYSE-520	0.0518777	6.34
NCI-H520	-0.0665286	5.705
OPM-2	-0.0131204	0.065
LNZTA3WT4	-0.0104379	48.56
NCI-N87	-0.151962	8.615
MDA-MB-468	-0.0645127	11.88
RCC-FG2	-0.22747	42.67
SNB75	-0.273781	24.7
Becker	-0.0411471	15.11
NB5	0.0187766	7.95
SK-N-FI	-0.0552536	0.07
GB-1	-0.0640697	4.95
TGW	-0.0211608	0.03
OVCAR-5	-0.365888	19.855
SCC-4	-0.218244	7.86
NCI-H1993	-0.162678	13.89
NCI-H2087	-0.13544	18.18
LB771-HNC	-0.0794962	8.56
HEC-1	-0.0596796	17.84
KP-1N	-0.156316	29.03
SF126	-0.169584	12.27
NCI-H1155	-0.0698554	0.05
TE-8	-0.187194	15.35
KP-3	-0.185797	17.05
HSC-4	-0.0934715	9.76
COLO-320-HSR	-0.0535538	16.06
BICR10	-0.358311	14.95
TE-5	-0.31595	11.39
EGI-1	-0.382956	10.74
KYSE-220	-0.185919	11.49
ESO51	-0.136899	16.64
CHP-212	-0.168202	7.065
HCC1395	-0.08291	25.94
PCI-38	-0.149659	11.75
PCI-30	-0.324841	9.49
NCI-H358	-0.233783	17.76
HOP-62	-0.363239	7.675
PCI-15A	-0.257775	11.07
KLE	-0.242108	9.82
NCI-H1299	-0.131857	14.865
RERF-LC-Sq1	-0.0693531	16.73
OVMIU	-0.580391	27.75
HCC70	-0.0939843	32.27
DAN-G	-0.132624	31.79
COR-L23	-0.21633	18.98
TE-9	-0.189486	5
UACC-893	-0.175407	7.32
769-P	-0.298462	51.735
HCC1143	-0.227362	21.8
NCI-H1975	-0.438041	11.545
PA-TU-8902	-0.279831	12.1
DU-145	-0.388032	10.95
SJSA-1	-0.282656	10.92
PC-14	-0.568853	11.51
KON	-0.230507	12.87
PL4	-0.630442	17.67
KNS-62	-0.337909	16.38
OE21	-0.48071	4.14
CAS-1	-0.477487	19.81
Hey	-0.494463	17.74
EC-GI-10	-0.433847	6.68
KNS-42	-0.329198	26.5
NCI-H650	-0.616919	34.67
8-MG-BA	-0.42436	12.72
OVISE	-0.535018	70.81
SF539	-0.518524	9.135
42-MG-BA	-0.370723	7.54
TYK-nu	-0.290245	25.04
PSN1	-0.250131	31.535
HARA	-0.394425	9.68
JIMT-1	-0.504055	11.95
HCC-78	-0.327585	7.14
DK-MG	-0.850205	39.93
LXF-289	-0.679156	15.67
SK-GT-4	-0.52955	14.55
NCI-H1355	-0.530277	12.44
SK-MEL-2	-0.459668	44.025
LN-229	-0.584028	30.955
D-502MG	-0.902424	76.4
A2058	-0.559358	38.98
A549	-0.341133	18.865
BICR78	-0.565121	10.84
KINGS-1	-0.613071	80.34
LCLC-97TM1	-0.510583	29.425
NCI-H1915	-0.573162	33.825
HCC1937	-0.967349	17.01
NMC-G1	-0.858875	62.15
EPLC-272H	-0.674377	13.83
DBTRG-05MG	-0.684968	32.4
MFE-280	-0.69402	12.13
OVCAR-3	-0.767977	15.6
U251	-0.696185	43.89
EFO-21	-0.823604	49.29
A172	-0.915546	33.755
HCC38	-1.07026	49.875
EBC-1	-1.53906	50.255
SK-MES-1	-1.82202	24.22

[truncated: 5 more sheets: Figure 3 - figure supplement 3C, Figure 3 - figure supplement 3D, Figure 3 - figure supplement 4B, Figure 3 - figure supplement 4D, Figure 3 - figure supplement 4F]
