# Supplementary material for: Genome-wide CRISPR screens of oral squamous cell carcinoma reveal fitness genes in the Hippo pathway
Source: eLife. 2020 Sep 29;9:e57761. doi: 10.7554/eLife.57761 (PMC7591259; doi:10.7554/eLife.57761)
Supplement: Figure 4—source data 1. [file elife-57761-fig4-data1.xlsx]

## Sheet: Figure 4A
Figure 4A
ORL-48	NT						PLK1						Y1K						Y2B						W1K						W2B
	Rep 1			Rep 2			Rep 1			Rep 2			Rep 1			Rep 2			Rep 1			Rep 2			Rep 1			Rep 2			Rep 1			Rep 2
% viable cells	92	92	116	101	121	78	58	68	65	51	48	59	53	54	54	25	30	31	62	54	48	51	27	48	99	92	80	91	105	98	84	101	85	89	82	101
ORL-214	NT						PLK1						Y1K						Y2B						W1K						W2B
	Rep 1			Rep 2			Rep 1			Rep 2			Rep 1			Rep 2			Rep 1			Rep 2			Rep 1			Rep 2			Rep 1			Rep 2
% viable cells	91	101	109	96	104	-	36	57	55	17	23	13	78	91	97	65	86	68	86	105	107	70	78	92	58	69	64	49	50	60	60	74	80	59	55	58
HSC-2	NT						PLK1						Y1K						Y2B						W1K						W2B
	Rep 1			Rep 2			Rep 1			Rep 2			Rep 1			Rep 2			Rep 1			Rep 2			Rep 1			Rep 2			Rep 1			Rep 2
% viable cells	89	103	108	92	105	103	62	65	65	58	65	61	95	110	115	98	104	100	95	111	134	109	116	106	109	108	122	93	92	107	99	95	93	106	115	124

## Sheet: Figure 4B
Figure 4B
ORL-48	NT			PLK1			Y1K			Y2B			W1K			W2B
% apoptotic cells	14.3	14.9	14.8	23.1	22.4	23.5	25.6	20.3	23.2	24.7	24.6	23.9	16.1	18.5	19	15.9	15.7	18
ORL-214	NT			PLK1			Y1K			Y2B			W1K			W2B
% apoptotic cells	20.4	22.6	23.7	36.7	41.3	39.5	22.2	24.5	23.3	26	21.2	27.8	33.6	37.6	34.8	35.8	34.2	37.2
HSC-2	NT			PLK1			Y1K			Y2B			W1K			W2B
% apoptotic cells	20.5	21.8	25.6	39.2	36.4	41.1	17.1	20.8	16.5	20.8	21.3	18.1	21.9	18.6	20.6	22.4	22.1	18.7
