# Supplementary material for: Genome-wide CRISPR screens of oral squamous cell carcinoma reveal fitness genes in the Hippo pathway
Source: eLife. 2020 Sep 29;9:e57761. doi: 10.7554/eLife.57761 (PMC7591259; doi:10.7554/eLife.57761)
Supplement: Figure 5—source data 1. [file elife-57761-fig5-data1.xlsx]

## Sheet: Figure 5B
Figure 5B - Co-competition assay
n (biological replicates) = 2
BICR10 Cas9	%BFP/mCherry double positive cells relative to day 4
	Day 4		Day 8		Day 12		Day 15		Day 18
PLK1	100	100	73.5	73.0422	66.4	65.1958	67.6	59.5482	63.2	59.2
CHAT	100	100	101.6	104.972	99.9	105.649	99.9	104.061	102.8	104.6
NT	100	100	107.1	105	108.3	102.7	109.2	106	106.1	108.5
Y1K + W1K	100	100	70.5	74.1	51	54.3	42.7	41.4	36.1	38.3
Y1K + W2B	100	100	72	78.1	51.6	58.6	40.3	42.2	31.7	35.1
Y2B + W1K	100	100	55.8	53.5	40.6	36.6	38	35.4	38.3	35.8
Y2B + W2B	100	100	60.8	66.3	41	49.2	32.4	35	28.9	32.6
HSC2 Cas9	%BFP/mCherry double positive cells relative to day 4
	Day 4		Day 8		Day 12		Day 15		Day 18
PLK1	100	100	84.9	67.1	71.6	48.5	57.1	34.4	49.1	25.4
CHAT	100	100	108.3	105.9	104.6	106	103.3	103.5	99.4	106.2
NT	100	100	108.1	104	112.6	101.7	108.4	105.2	104	107.4
Y1K + W1K	100	100	67.1	84.1	44.7	58.1	32.1	46.3	18.5	38.5
Y1K + W2B	100	100	76.2	89.2	53.2	62	35.9	53	21.1	46.1
Y2B + W1K	100	100	41	57.2	21.5	32.4	24.7	23.1	9.7	20.7
Y2B + W2B	100	100	53	76.9	28.4	43.6	21.1	32.6	10.3	28.8

## Sheet: Figure 5C
Figure 5C - qPCR raw data
n (biological replicates) = 1
n (technical replicates) = 3
BICR10 Cas9	Log2 Fold Change
	CTGF			CYR61
NT	-0.104697	0	0.111031	-0.0439433	0.0703893	-0.0291463
Y1K	-0.0439433	0.0285692	0.0426443	0	0.111031	0.0840643
Y2B	-0.473931	-0.494109	-0.434403	-0.395929	-0.37707	-0.494109
W1K	-0.0740006	-0.0740006	-0.0291463	-0.0892673	-0.0291463	-0.0291463
W2B	-0.0439433	-0.104697	-0.104697	0.367371	0.321928	0.298658
Y1K + W1K	-1.08927	-1.12029	-1.05889	-1.68966	-1.8365	-1.59946
Y1K + W2B	-0.915936	-1.05889	-0.971431	-1.02915	-1.18442	-1.152
Y2B + W1K	-1.51457	-1.51457	-1.51457	-	-1.68966	-1.68966
Y2B + W2B	-1.39593	-1.51457	-1.39593	-1.88897	-2.05889	-1.94342
HSC2 Cas9	Log2 Fold Change
	CTGF			CYR61
NT	0.0285692	-0.0588937	0.0285692	-0.120294	0.0426443	0.0840643
Y1K	-1.21759	-1.25154	-1.18442	-0.643856	-0.556393	-0.666576
Y2B	-2	-1.51457	-1.73697	-0.599462	-0.836501	-0.666576
W1K	-0.434403	-0.434403	-0.395929	-0.340075	-0.268817	-0.514573
W2B	-0.599462	-0.68966	-0.736966	-0.304006	-0.395929	-0.340075
Y1K + W1K	-3.47393	-3.47393	-3.47393	-1.73697	-1.73697	-1.8365
Y1K + W2B	-2.39593	-2.47393	-2.47393	-1	-0.785875	-0.862496
Y2B + W1K	-5.05889	-5.05889	-4.64386	-2	-1.88897	-2
Y2B + W2B	-4.05889	-4.64386	-4.64386	-1.94342	-1.88897	-2.18442
