# Supplementary material for: Genome-wide CRISPR screens of oral squamous cell carcinoma reveal fitness genes in the Hippo pathway
Source: eLife journal article supplement (doi:10.7554/elife.57761), 2020-09-29
Supplement: supp [file elife-57761-supp-v1.zip]

Supplementary file 13 – All uncropped western blot images.

For Figure 3B: Single Knockout (1)

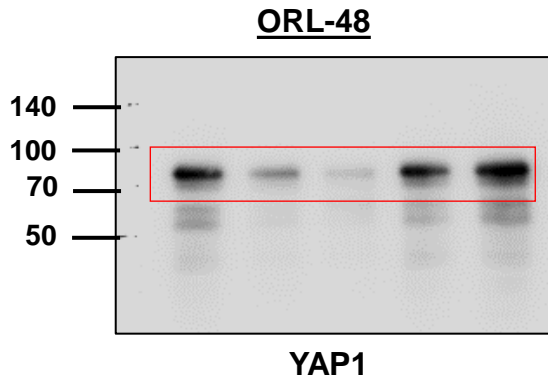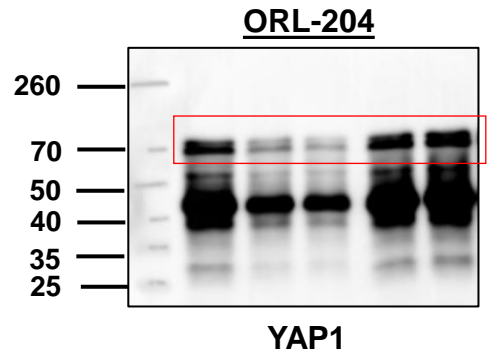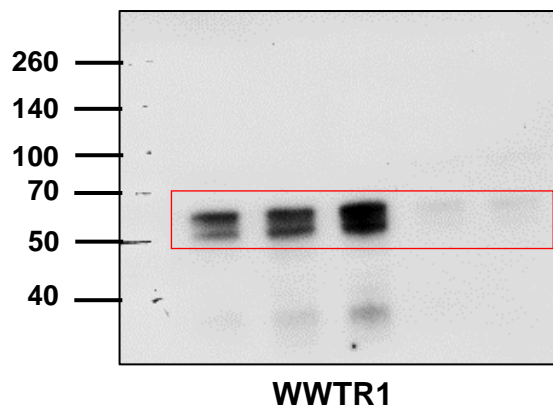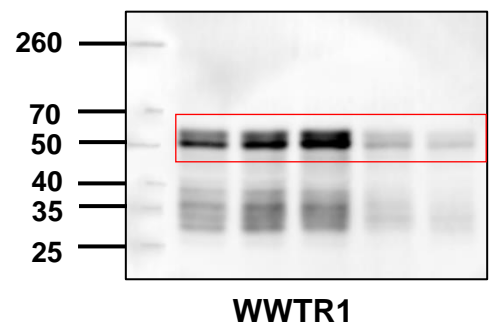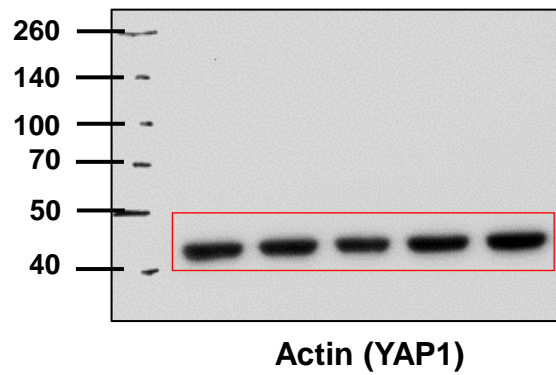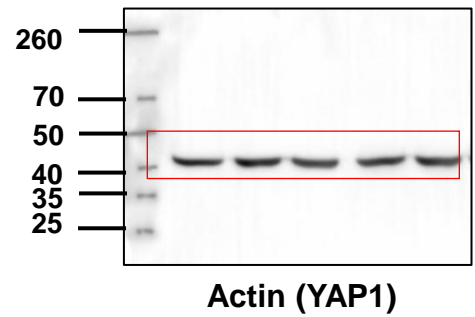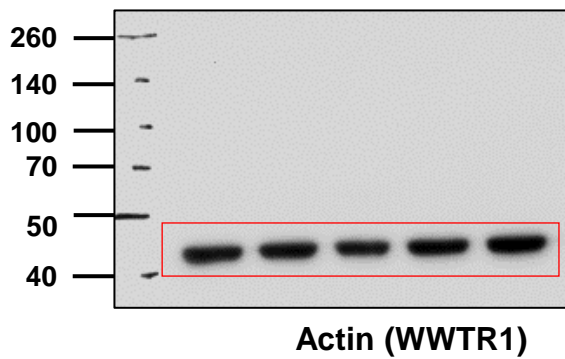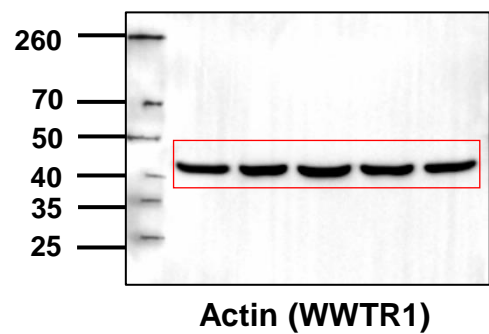

For Figure 3B: Single Knockout (2)

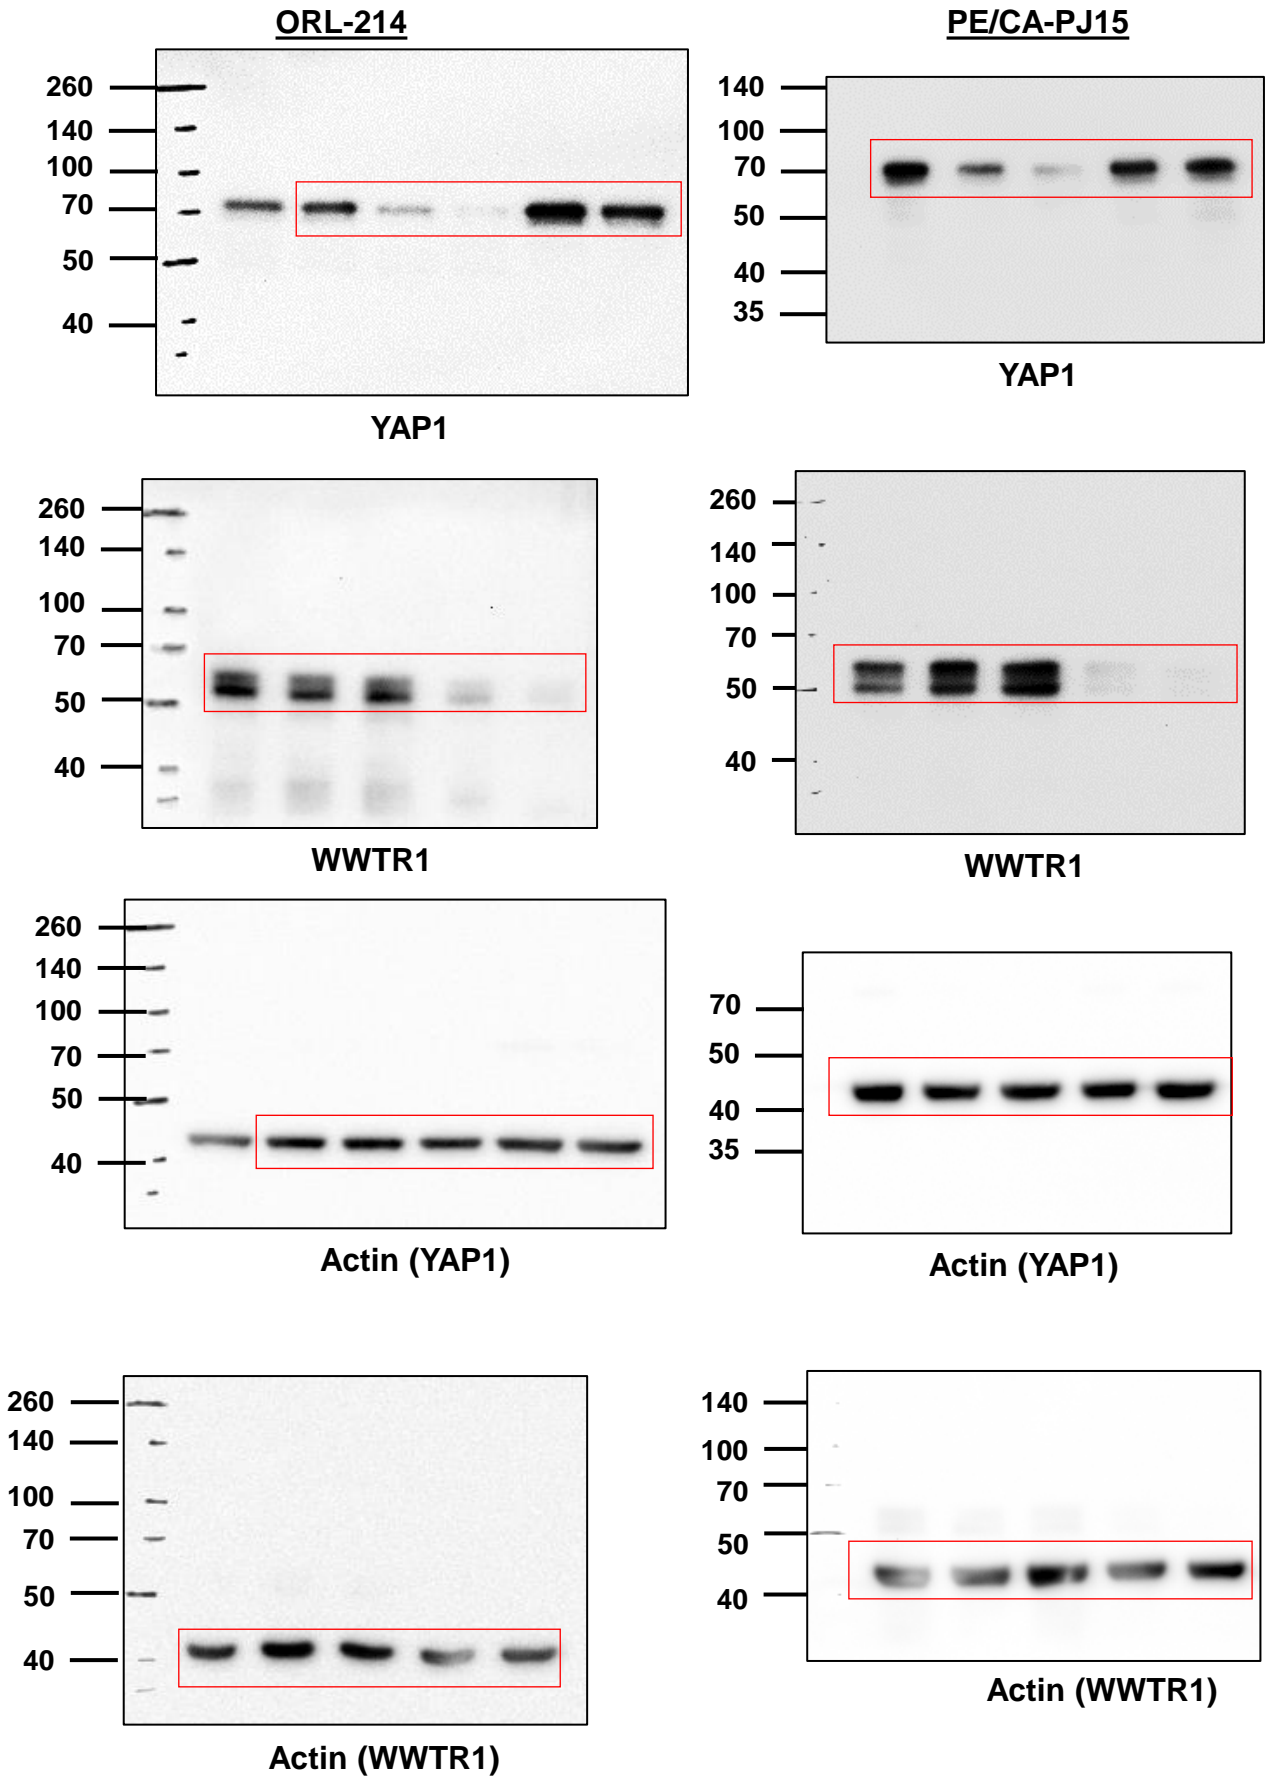

For Figure 3B: Single Knockout (3)

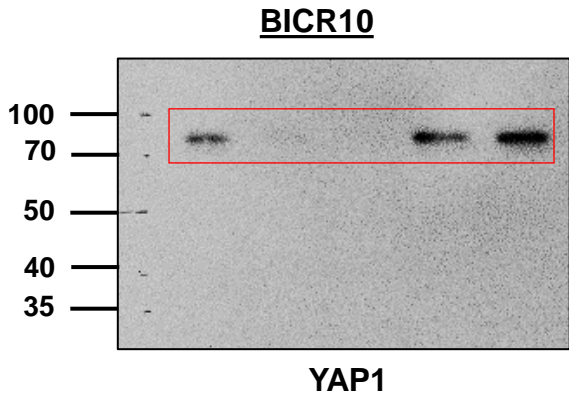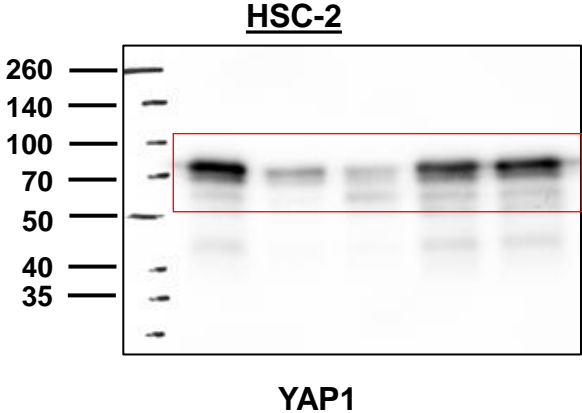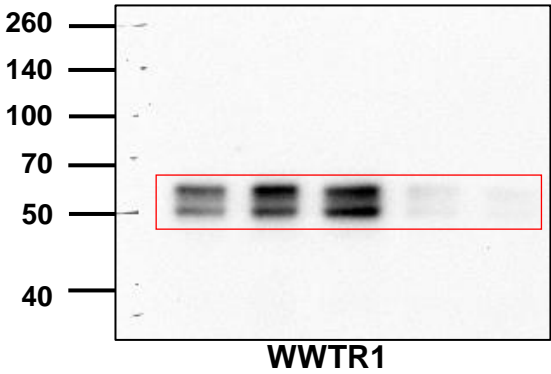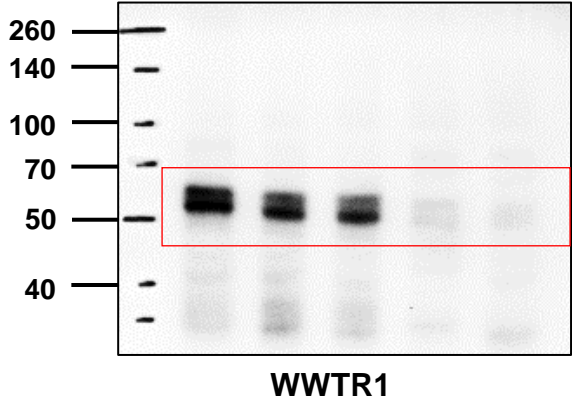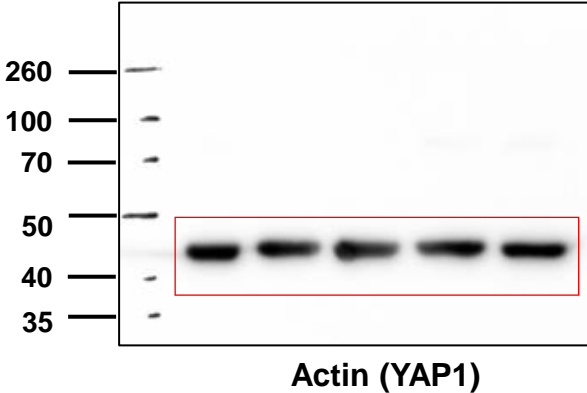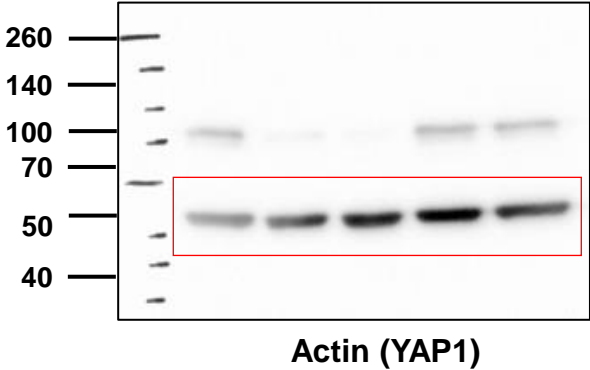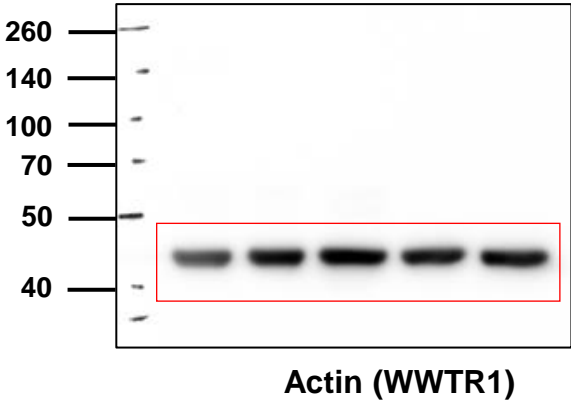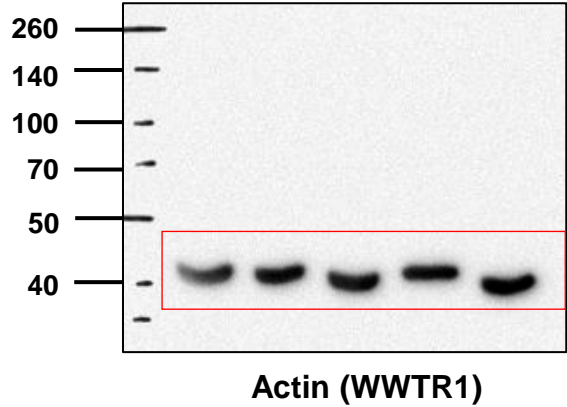

For Figure 3-figure supplement 2F: Parental Baseline

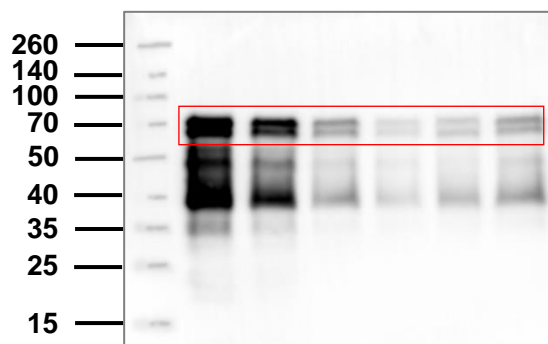

YAP1

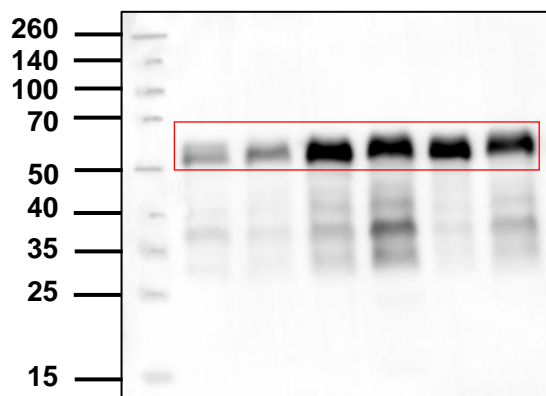

WWTR1

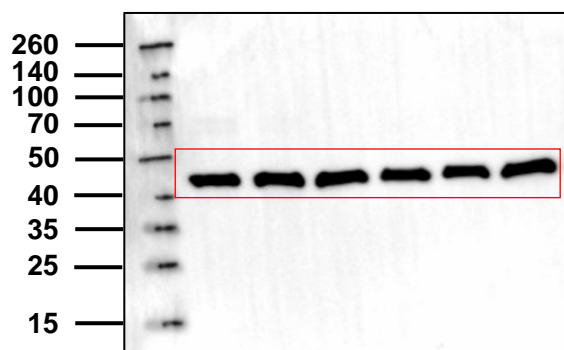

Actin (YAP1)

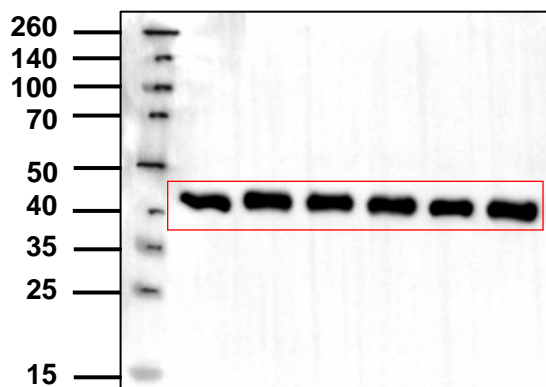

Actin (WWTR1)

For Figure 3-figure supplement 4C: Single Knockout

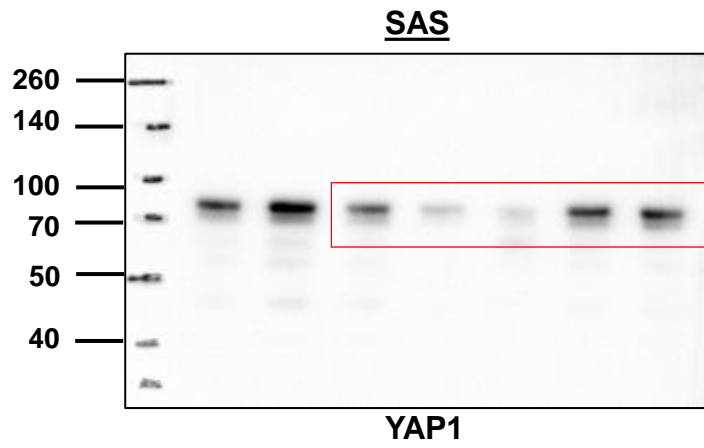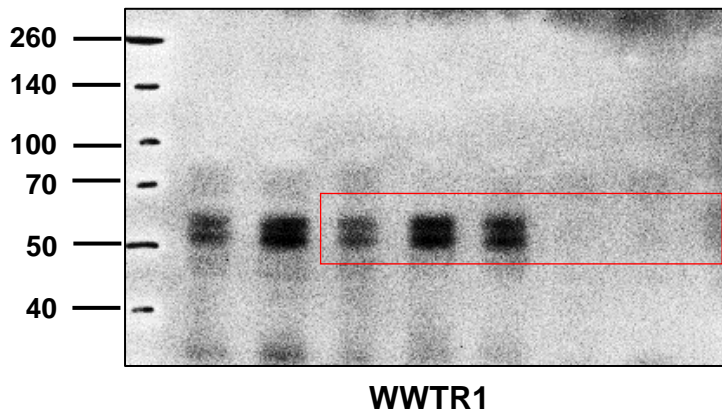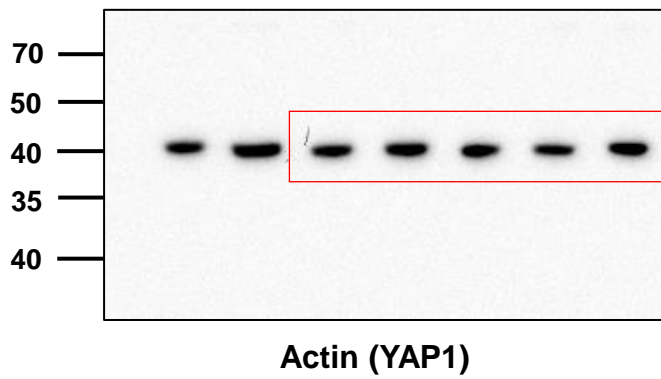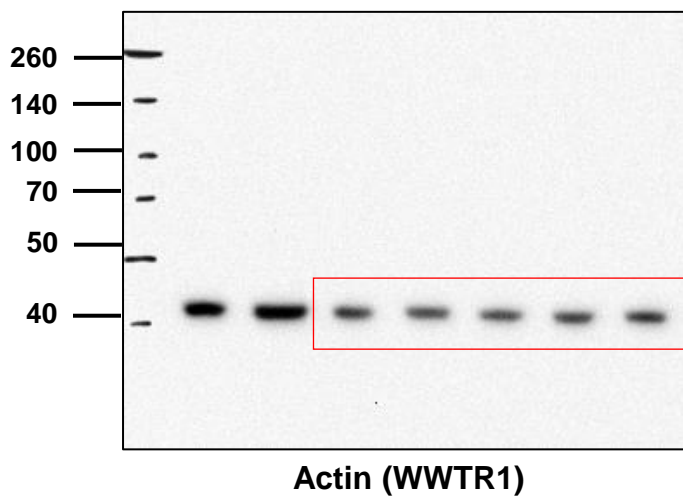

For Figure 5: Double Knockout

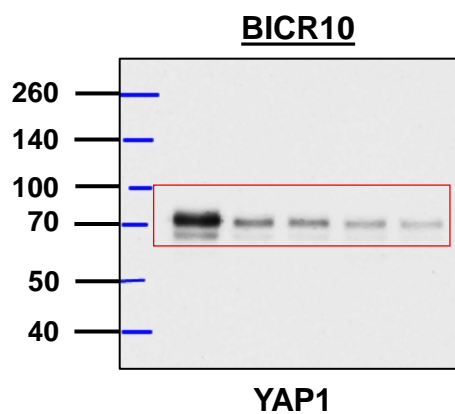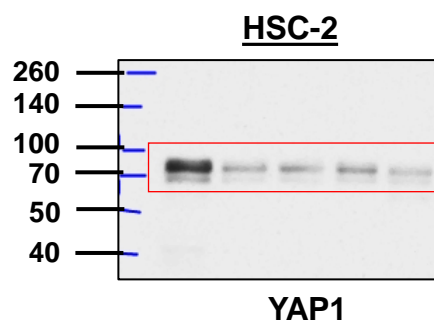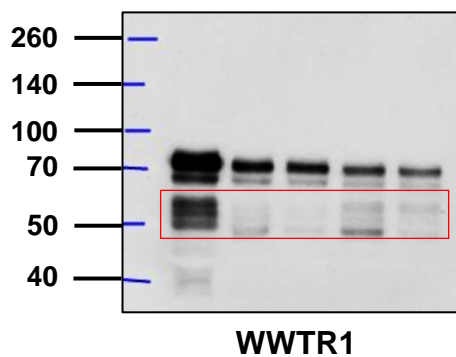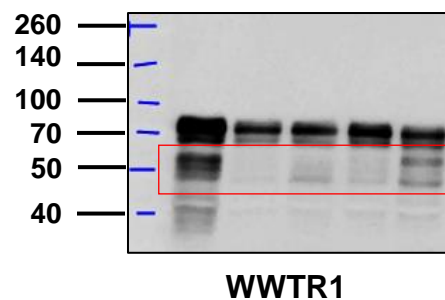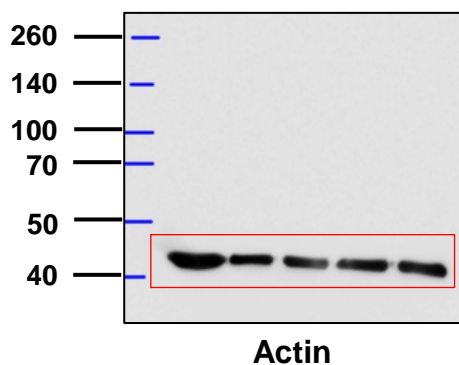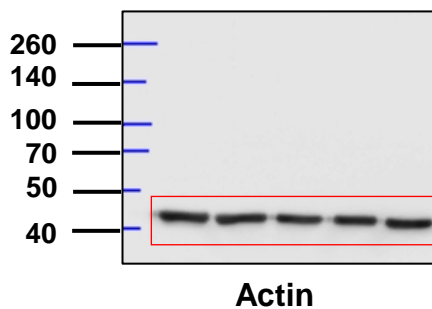

Actin was only probed on YAP1-probed blots
