# Supplementary material for: Genome-wide CRISPR screens of oral squamous cell carcinoma reveal fitness genes in the Hippo pathway
Source: eLife journal article supplement (doi:10.7554/elife.57761), 2020-09-29
Supplement: supp [file elife-57761-supp-v1.zip]

## Sheet: Figure 6A
Figure 6A - Signature scores for plotting heatmap
	ORL-48	ORL-204	SAS	ORL-188	ORL-214	PE/CA-PJ15	BICR10	HSC-2	HSC-4
YAP1 dependency signature score	2.19634	1.99384	1.80771	-0.893146	-1.27417	-0.952534	-0.617904	-0.993856	-1.26628
WWTR1 dependency signature score	-1.33898	-1.24929	-0.442807	1.50968	2.26604	1.7194	-1.25706	-0.775115	-0.431865
Compensable signature score	-0.73294	-0.607509	-1.45613	-1.32769	-0.749864	-0.650061	2.03845	1.55148	1.93427

## Sheet: Figure 6B
Figure 6B - Signature scores for plotting heatmap
OSCC samples from TCGA	YAP1 dependency signature score	WWTR1 dependency signature score	Compensable signature score
TCGA-4P-AA8J-01	-0.764725	0.0767606	0.46579
TCGA-BA-4074-01	0.865516	-0.84235	0.173089
TCGA-BA-4075-01	0.492316	-1.26748	-0.0783509
TCGA-BA-5149-01	0.798483	0.0279007	-1.09756
TCGA-BA-5151-01	0.112581	0.190526	-0.231503
TCGA-BA-5152-01	-0.241241	0.518125	-0.0318921
TCGA-BA-5556-01	-0.250675	0.729819	-0.301039
TCGA-BA-5557-01	-0.284452	0.221132	-0.0398789
TCGA-BA-5558-01	0.301295	0.266778	-0.525789
TCGA-BA-6872-01	0.190366	0.0295266	-0.33283
TCGA-BA-6873-01	0.597897	-0.174879	-0.424023
TCGA-BA-7269-01	-0.538842	-0.415888	0.459718
TCGA-BA-A6D8-01	-0.114114	-0.581747	0.282532
TCGA-BA-A6DB-01	-0.409736	0.159495	0.446231
TCGA-BA-A6DD-01	-0.263809	0.536537	-0.148501
TCGA-BA-A6DE-01	0.295356	0.167668	-0.121081
TCGA-BA-A6DG-01	-0.424697	-0.186733	-0.0362798
TCGA-BA-A6DJ-01	-0.300976	0.684143	-0.634843
TCGA-BB-4224-01	0.580156	-0.222713	0.428529
TCGA-BB-7863-01	-0.201328	0.0183795	0.0112134
TCGA-BB-7872-01	-0.896484	0.334082	0.603164
TCGA-BB-8601-01	0.466059	-0.705212	0.159185
TCGA-BB-A5HU-01	0.171632	-0.37136	-0.11731
TCGA-BB-A5HZ-01	0.0871403	0.382933	-0.600369
TCGA-BB-A6UO-01	0.0149093	-0.135143	-0.444193
TCGA-C9-A47Z-01	-0.11755	0.073699	0.189611
TCGA-C9-A480-01	-0.165689	0.303791	-0.136907
TCGA-CN-4725-01	0.678954	-0.289399	-0.13474
TCGA-CN-4726-01	-0.450186	-0.101217	0.680952
TCGA-CN-4728-01	-0.166217	-0.776981	0.675994
TCGA-CN-4729-01	0.370839	0.00019122	-0.566089
TCGA-CN-4730-01	0.996859	-0.43648	-0.75082
TCGA-CN-4731-01	0.00339702	0.0739385	-0.179424
TCGA-CN-4733-01	-0.15402	-0.0134123	-0.0519302
TCGA-CN-4734-01	0.0203496	0.229027	-0.0666531
TCGA-CN-4736-01	-0.504852	0.0725162	0.348066
TCGA-CN-4737-01	0.0567426	-0.519834	0.363704
TCGA-CN-4740-01	0.090956	-0.668727	0.656023
TCGA-CN-4741-01	0.211789	0.243967	0.471063
TCGA-CN-4742-01	-0.0335865	-0.116369	0.110739
TCGA-CN-5358-01	0.0568543	-0.515298	0.308774
TCGA-CN-5359-01	0.26616	-0.55262	0.429943
TCGA-CN-5364-01	0.296392	0.293764	0.239865
TCGA-CN-5367-01	0.513451	-0.280118	-0.547678
TCGA-CN-5369-01	0.0497211	0.31164	-0.145602
TCGA-CN-5370-01	0.20712	-0.270301	0.14611
TCGA-CN-5373-01	-0.694938	0.349639	0.54135
TCGA-CN-6011-01	-0.34936	0.463754	-0.298144
TCGA-CN-6013-01	-1.18662	0.97861	0.0545786
TCGA-CN-6016-01	-0.94735	-0.404877	1.15849
TCGA-CN-6017-01	-0.131844	-0.112539	0.148279
TCGA-CN-6018-01	0.300182	-0.339065	0.330193
TCGA-CN-6019-01	-0.557886	-0.773065	0.845009
TCGA-CN-6020-01	0.0199746	0.355471	-0.165791
TCGA-CN-6024-01	0.0657801	-0.463723	0.307677
TCGA-CN-6994-01	-0.550252	0.115928	0.237009
TCGA-CN-6995-01	-0.224156	0.912184	-1.00206
TCGA-CN-6996-01	0.0487131	0.109934	0.0607389
TCGA-CN-6998-01	-0.346952	0.625524	-0.145289
TCGA-CN-A49A-01	0.413589	-0.842262	0.55874
TCGA-CN-A63V-01	-0.143161	-0.19	0.0942491
TCGA-CN-A642-01	-0.000573965	0.200132	-0.442846
TCGA-CQ-5323-01	0.544783	0.124454	-0.0258426
TCGA-CQ-5324-01	-0.377815	0.350958	-0.230115
TCGA-CQ-5325-01	-0.177801	0.18677	0.315871
TCGA-CQ-5326-01	0.837048	-0.337992	-0.740402
TCGA-CQ-5327-01	0.0272967	0.406219	-0.436571
TCGA-CQ-5329-01	0.346973	-0.371452	0.233388
TCGA-CQ-5330-01	0.291528	-0.171956	-0.305768
TCGA-CQ-5331-01	0.000828941	0.328782	0.115066
TCGA-CQ-5332-01	0.109059	-0.412698	-0.0182095
TCGA-CQ-5333-01	-0.50904	0.234553	0.228974
TCGA-CQ-5334-01	0.215662	0.0320158	0.149512
TCGA-CQ-6218-01	-0.293113	0.347714	0.0384368
TCGA-CQ-6219-01	-0.060375	0.0684371	0.360895
TCGA-CQ-6220-01	-0.0815381	0.468344	-0.306489
TCGA-CQ-6221-01	-0.215244	-1.8518	1.58712
TCGA-CQ-6222-01	-0.373188	0.338034	0.288912
TCGA-CQ-6223-01	-0.625476	0.871376	-0.0871451
TCGA-CQ-6224-01	-0.156547	-0.732423	0.649978
TCGA-CQ-6225-01	-0.112687	0.265177	-0.133963
TCGA-CQ-6227-01	-0.051717	-0.371683	-0.157308
TCGA-CQ-6228-01	-0.207983	-0.484897	0.63262
TCGA-CQ-6229-01	-0.0673286	0.179033	0.234599
TCGA-CQ-7063-01	-0.410198	0.335805	-0.290908
TCGA-CQ-7065-01	-0.700965	0.101904	0.442178
TCGA-CQ-7067-01	-0.234873	0.278603	-0.282757
TCGA-CQ-7068-01	-0.446143	0.612084	-0.013784
TCGA-CQ-7069-01	-0.428262	0.378198	-0.984678
TCGA-CQ-7071-01	-0.0454833	0.0389454	0.118257
TCGA-CQ-7072-01	-0.124068	-1.17768	1.48091
TCGA-CQ-A4C6-01	-0.297413	0.343978	-0.0970498
TCGA-CQ-A4C7-01	0.169436	-0.213468	-0.11348
TCGA-CQ-A4C9-01	-0.00112254	0.290688	0.0373554
TCGA-CQ-A4CA-01	-0.701012	0.333859	0.26207
TCGA-CQ-A4CB-01	0.798898	0.0722455	-1.03953
TCGA-CQ-A4CD-01	0.335678	0.160214	-1.77899
TCGA-CQ-A4CE-01	-0.104518	0.353033	0.0377363
TCGA-CQ-A4CG-01	0.193999	-0.320562	0.332934
TCGA-CQ-A4CH-01	0.368541	0.00489631	-0.247924
TCGA-CQ-A4CI-01	1.03687	-1.15177	0.118362
TCGA-CR-6471-01	0.350479	0.235268	0.0649922
TCGA-CR-6484-01	-0.107032	0.0878947	0.465199
TCGA-CR-6488-01	-0.152144	-0.220502	0.221144
TCGA-CR-6491-01	0.171891	0.200154	-0.457299
TCGA-CR-6492-01	-0.166711	0.558742	-0.122492
TCGA-CR-6493-01	0.994614	-0.394804	-0.782404
TCGA-CR-7365-01	0.04095	0.110675	-0.0967074
TCGA-CR-7367-01	0.496618	-0.62004	0.129024
TCGA-CR-7368-01	0.533161	0.152684	0.347594
TCGA-CR-7369-01	0.463646	0.191944	0.303556
TCGA-CR-7372-01	0.380436	-0.479539	0.386358
TCGA-CR-7373-01	0.741026	-0.0764958	-0.660771
TCGA-CR-7376-01	-0.230976	-0.44043	0.760873
TCGA-CR-7377-01	0.0846425	-0.0588009	0.0286019
TCGA-CR-7379-01	0.746469	-0.510113	-0.331412
TCGA-CR-7380-01	0.180922	-0.409293	0.396222
TCGA-CR-7382-01	0.505042	-0.681769	0.254039
TCGA-CR-7386-01	-0.718173	-0.484752	1.15197
TCGA-CR-7390-01	0.744687	-0.247784	-0.421038
TCGA-CR-7391-01	-0.203567	0.222044	0.374436
TCGA-CR-7392-01	-0.00174835	-0.285551	0.511637
TCGA-CR-7393-01	-0.186506	-0.199577	0.422712
TCGA-CR-7394-01	-0.175234	0.196817	0.193838
TCGA-CR-7395-01	-0.0325561	0.140879	0.242977
TCGA-CR-7397-01	-0.11281	-0.456588	0.439218
TCGA-CR-7401-01	-0.397949	-0.38455	0.686466
TCGA-CV-5436-01	0.174896	-0.740137	-0.0223462
TCGA-CV-5442-01	0.654302	0.154335	-0.187214
TCGA-CV-5966-01	1.22022	0.0715838	-1.52007
TCGA-CV-5970-01	0.00215553	0.152428	0.0185332
TCGA-CV-5971-01	-0.0239397	-0.547787	0.767279
TCGA-CV-5973-01	-0.502906	0.621601	-0.405467
TCGA-CV-5976-01	-0.0906943	-0.0252291	-0.311823
TCGA-CV-5977-01	0.359569	0.430125	-0.864447
TCGA-CV-5979-01	0.141377	-0.162808	-0.193731
TCGA-CV-6003-01	0.688824	-0.251596	-0.73113
TCGA-CV-6433-01	0.393268	-0.196957	0.319222
TCGA-CV-6436-01	-0.333702	0.375776	-0.0887256
TCGA-CV-6441-01	-0.112991	0.22757	-0.0192957
TCGA-CV-6933-01	-0.244218	-0.794897	0.484639
TCGA-CV-6934-01	-0.418629	-0.590623	0.779368
TCGA-CV-6936-01	0.436887	0.263148	-0.219216
TCGA-CV-6937-01	-0.615241	0.155693	0.257012
TCGA-CV-6938-01	-0.35451	0.479825	0.0420016
TCGA-CV-6939-01	0.624645	0.0921003	0.396294
TCGA-CV-6940-01	0.418954	-0.360688	0.186778
TCGA-CV-6941-01	0.177873	-0.205181	0.18417
TCGA-CV-6942-01	0.174636	-0.175045	-0.0049819
TCGA-CV-6945-01	-0.383763	0.398637	-0.40981
TCGA-CV-6948-01	0.475042	-0.584947	0.343839
TCGA-CV-6951-01	-0.378115	0.210138	0.532415
TCGA-CV-6952-01	-0.170228	0.397952	-0.363883
TCGA-CV-6953-01	-0.16224	0.282971	-0.458337
TCGA-CV-6954-01	-0.0540623	-0.153365	0.40054
TCGA-CV-6955-01	-0.674629	0.667444	0.435277
TCGA-CV-6956-01	0.286998	0.154674	-0.469818
TCGA-CV-6959-01	0.44324	-0.219664	-0.216696
TCGA-CV-6960-01	0.368902	-0.699192	-0.000575274
TCGA-CV-6961-01	0.206977	-0.0627773	-0.481228
TCGA-CV-7090-01	-0.157912	0.0823059	0.228522
TCGA-CV-7091-01	0.166307	0.016336	0.270689
TCGA-CV-7095-01	-0.107941	0.256297	-0.349194
TCGA-CV-7097-01	0.630199	-0.159403	-0.187637
TCGA-CV-7099-01	-0.131905	0.541233	-0.401692
TCGA-CV-7100-01	0.354413	-0.0295892	-0.536519
TCGA-CV-7102-01	0.551033	-0.896748	-0.048302
TCGA-CV-7103-01	-0.0662031	-1.00402	1.13668
TCGA-CV-7104-01	-0.511779	0.219611	0.17013
TCGA-CV-7178-01	0.144851	-0.506389	0.184316
TCGA-CV-7180-01	0.139384	-0.139971	-0.112381
TCGA-CV-7183-01	-0.100965	0.267571	-0.0271216
TCGA-CV-7235-01	0.0901014	-0.0672874	-0.166879
TCGA-CV-7236-01	-0.0416575	-0.167278	-0.302441
TCGA-CV-7238-01	-0.382838	0.212362	0.148496
TCGA-CV-7243-01	-0.350955	-0.259523	0.656673
TCGA-CV-7252-01	0.0653276	-0.219074	-0.172139
TCGA-CV-7253-01	0.0680807	0.232182	-0.134017
TCGA-CV-7254-01	0.0263644	-0.813228	0.98017
TCGA-CV-7255-01	0.0745518	0.0137692	-0.398824
TCGA-CV-7263-01	-0.0321577	-0.315489	0.528079
TCGA-CV-7407-01	-0.403983	0.026971	0.266727
TCGA-CV-7409-01	0.175737	0.146849	-0.0724735
TCGA-CV-7411-01	-0.690832	0.401664	0.0972068
TCGA-CV-7413-01	-0.733369	-0.233626	0.441267
TCGA-CV-7414-01	-0.644604	0.0772383	1.02845
TCGA-CV-7416-01	-0.0167091	-0.426428	0.935301
TCGA-CV-7423-01	0.15667	0.18306	-0.445562
TCGA-CV-7425-01	-0.125998	0.32259	0.295127
TCGA-CV-7427-01	-0.231819	0.730653	-0.323291
TCGA-CV-7428-01	0.210899	0.10323	-0.0991839
TCGA-CV-7429-01	0.545903	-0.626346	-0.104858
TCGA-CV-7432-01	0.716506	-0.266172	-0.699878
TCGA-CV-7434-01	0.229309	0.315421	-0.122407
TCGA-CV-7435-01	-0.0156084	-0.158647	0.562195
TCGA-CV-7438-01	0.26885	-0.350532	0.290439
TCGA-CV-7446-01	0.612807	-0.584398	0.489248
TCGA-CV-7568-01	-0.0227131	-0.751568	0.458044
TCGA-CV-A45O-01	-0.981484	1.4497	-0.461155
TCGA-CV-A45P-01	-0.0934663	0.447644	-0.342327
TCGA-CV-A45Q-01	-0.13419	0.401509	-0.551346
TCGA-CV-A45R-01	-0.477327	0.451866	0.271884
TCGA-CV-A45T-01	-0.044285	0.163558	-0.280644
TCGA-CV-A45U-01	-0.0166575	-0.21399	0.404521
TCGA-CV-A45V-01	-0.476366	0.383326	0.210994
TCGA-CV-A45X-01	0.0312424	0.520427	-0.539989
TCGA-CV-A463-01	-0.111006	0.167714	0.254996
TCGA-CV-A464-01	-0.313317	-0.0600556	0.407651
TCGA-CV-A465-01	0.052122	0.468346	-0.297022
TCGA-CV-A468-01	-0.276464	0.443287	-0.0396956
TCGA-CV-A6JD-01	-0.835823	0.147942	0.468596
TCGA-CV-A6JE-01	-0.409801	0.328705	0.236428
TCGA-CV-A6JN-01	-0.222508	0.460815	-0.616881
TCGA-CV-A6JO-01	-0.509563	0.584903	-0.26686
TCGA-CV-A6JT-01	-1.25727	0.406697	0.994968
TCGA-CV-A6JU-01	-0.767539	0.467276	-0.48804
TCGA-CV-A6JY-01	0.0709783	0.216925	-0.0920285
TCGA-CV-A6JZ-01	0.0864908	0.292972	-0.236301
TCGA-CV-A6K0-01	-0.020292	-0.190692	0.345558
TCGA-CV-A6K2-01	-0.422153	0.371068	0.26341
TCGA-CX-7082-01	0.202282	-0.627419	0.549436
TCGA-CX-7085-01	-0.115327	-0.0016583	-0.0433075
TCGA-CX-7086-01	0.901282	0.366921	-0.625783
TCGA-CX-7219-01	0.29906	-0.0678486	-0.376357
TCGA-CX-A4AQ-01	-0.580219	0.44572	-0.10232
TCGA-D6-6515-01	0.113301	-0.183792	0.366336
TCGA-D6-6516-01	-0.205178	0.334096	0.356105
TCGA-D6-6823-01	1.17609	-0.285024	-0.713901
TCGA-D6-6825-01	0.0328399	0.283805	-0.160921
TCGA-D6-6827-01	1.27027	-0.871353	0.353771
TCGA-D6-8569-01	0.311506	0.259335	-0.263192
TCGA-D6-A4Z9-01	0.69315	-0.0761335	-0.683085
TCGA-D6-A4ZB-01	-0.496138	0.285016	-0.0112699
TCGA-D6-A6EM-01	0.0976115	0.18725	-0.318598
TCGA-D6-A6EN-01	-0.311376	0.725606	-1.49789
TCGA-D6-A6EO-01	0.488747	0.101714	-0.238285
TCGA-DQ-5624-01	-0.420063	-0.0354108	-0.215396
TCGA-DQ-5625-01	-0.523552	0.559063	0.195257
TCGA-DQ-5630-01	-0.942532	0.472263	0.370874
TCGA-DQ-5631-01	0.333588	-0.33354	-0.176406
TCGA-DQ-7588-01	0.925944	-0.810013	-1.30765
TCGA-DQ-7592-01	-0.0318716	0.156078	0.261105
TCGA-F7-8489-01	-0.755743	0.323893	0.263731
TCGA-F7-A50G-01	-0.364218	0.453454	0.239958
TCGA-F7-A50J-01	-0.157766	0.0803071	0.026779
TCGA-F7-A61S-01	-0.258002	0.648523	-0.0114875
TCGA-F7-A61W-01	0.318097	-0.427414	-0.383369
TCGA-F7-A624-01	0.858515	-0.590388	-0.137326
TCGA-H7-7774-01	-0.510621	0.467981	0.462585
TCGA-H7-8501-01	0.430986	0.341154	-1.00235
TCGA-H7-8502-01	0.37091	-0.0251465	-1.01786
TCGA-H7-A6C4-01	-0.478299	0.3597	-0.451113
TCGA-HD-7831-01	-0.226087	-1.40356	1.51805
TCGA-HD-7832-01	0.763222	0.442477	-0.513203
TCGA-HD-7917-01	0.6222	0.13587	-0.322744
TCGA-HD-8634-01	0.110079	0.370607	-0.211302
TCGA-HD-8635-01	0.128729	-0.343777	0.0542601
TCGA-HD-A4C1-01	0.227811	-0.0371765	-0.426351
TCGA-HD-A633-01	0.330401	-0.156848	-0.525365
TCGA-HD-A6HZ-01	-0.0490172	-0.243372	0.078188
TCGA-HD-A6I0-01	-0.194063	0.165685	-0.485696
TCGA-HL-7533-01	0.430627	0.482423	0.0774342
TCGA-IQ-7631-01	-1.55031	0.130727	0.473139
TCGA-IQ-7632-01	-0.0651893	-0.157809	-0.0409151
TCGA-IQ-A61E-01	0.375064	-0.0727446	-0.546065
TCGA-IQ-A61G-01	0.113584	-0.189335	-0.367434
TCGA-IQ-A61H-01	0.792056	-0.702082	0.383141
TCGA-IQ-A61J-01	-0.471852	0.0157301	0.564084
TCGA-IQ-A6SG-01	0.31338	-0.29132	-0.0367974
TCGA-IQ-A6SH-01	-0.811712	0.286405	0.0684341
TCGA-KU-A66T-01	0.041812	-0.145865	-0.2258
TCGA-KU-A6H8-01	-0.178756	-0.115203	0.656907
TCGA-MT-A51X-01	-0.05251	-0.0649889	0.182599
TCGA-MT-A67A-01	-0.142815	0.171814	0.489118
TCGA-MT-A67D-01	0.296537	0.122321	-0.658678
TCGA-MT-A67F-01	-0.639663	1.46118	-1.39669
TCGA-MT-A7BN-01	-0.529743	0.0277868	0.187197
TCGA-P3-A5QA-01	0.636891	-1.33406	0.323967
TCGA-P3-A5QF-01	0.134233	0.549125	0.316154
TCGA-P3-A6T0-01	-0.102669	-0.340885	0.342455
TCGA-P3-A6T2-01	0.553991	-0.0196088	-0.773392
TCGA-P3-A6T3-01	-0.0653746	0.29464	-0.752198
TCGA-P3-A6T4-01	-0.203705	0.281475	-0.123037
TCGA-P3-A6T5-01	-0.374893	0.168783	0.274329
TCGA-P3-A6T6-01	0.294833	0.169199	0.0591794
TCGA-P3-A6T7-01	-0.156463	0.783986	-0.669379
TCGA-P3-A6T8-01	-0.252987	-0.116722	0.0379459
TCGA-QK-A64Z-01	-0.410782	0.175678	0.283194
TCGA-QK-A652-01	-0.512858	0.576013	0.180529
TCGA-QK-A6IG-01	1.06366	-0.372382	-1.15663
TCGA-QK-A6IH-01	-0.243233	0.187725	0.0268766
TCGA-QK-A6II-01	-0.616809	1.05074	-1.162
TCGA-QK-A6IJ-01	-0.4811	0.67626	-0.354897
TCGA-QK-A6VB-01	0.788972	0.0184271	0.479311
TCGA-QK-A8Z7-01	0.790188	-1.03158	0.0621914
TCGA-QK-A8Z9-01	-0.348571	-0.666403	0.954962
TCGA-QK-AA3K-01	0.104451	-1.02067	0.404206
TCGA-RS-A6TO-01	-0.046204	0.557941	-0.924981
TCGA-T2-A6WX-01	-0.324668	0.592547	-0.352161
TCGA-T2-A6WZ-01	-0.144702	0.0181117	-0.220049
TCGA-T2-A6X2-01	-0.160683	0.328813	-0.268496
TCGA-T3-A92N-01	0.352744	0.188181	-0.469696
TCGA-UF-A719-01	0.439127	0.595051	-0.260676
TCGA-UF-A71A-01	0.00955102	-0.762603	0.63568
TCGA-UF-A71B-01	0.364166	-0.613215	0.240383
TCGA-UF-A71E-01	-0.327804	0.146204	0.386069
TCGA-UF-A7JA-01	-0.0824566	-0.107714	0.276457
TCGA-UF-A7JC-01	0.160336	-0.00353425	-0.52524
TCGA-UF-A7JD-01	0.832293	-1.1839	0.280746
TCGA-UF-A7JO-01	-0.236055	0.0763483	0.181786
TCGA-UF-A7JS-01	-0.70241	1.06735	-0.90168
TCGA-UF-A7JT-01	-0.106692	0.381393	-0.106438
TCGA-UP-A6WW-01	-0.0212445	0.120119	0.516858
TCGA-WA-A7GZ-01	0.141812	-0.181401	0.261485
TCGA-WA-A7H4-01	0.243374	-0.445968	0.454157

## Sheet: Figure 6D
Figure 6D - Stromal and immune signature scores (Thorsson et al.)
Stromal signature enrichment score			Immune signature enrichment score
YAP1-dependent	WWTR1-dependent	Compensable	YAP1-dependent	WWTR1-dependent	Compensable
5388.68	3757.63	5197.38	4559.05	7622.35	6394
3231.75	3506.83	5963.26	5398.94	8356.88	6998.82
3368.24	3944.59	8776.79	5560.59	7618.85	7658.17
826.425	2312.64	8642.83	4664.29	7635.92	7796.46
2494.94	3657.45	6435.06	4096.92	8672.15	7178.86
1077.6	2418.62	8484.51	2600.49	7919.48	5809.09
3965.01	1023.53	8796.9	5330.74	6496.14	7435.76
2058.84	992.177	5385.38	6242.37	7053.22	2238.84
3444.49	1683.94	8966.12	6127.82	8117.03	4982.52
6085.9	2201.94	8075.19	6133.75	6875.49	5961.73
4082.45	1366.48	3434.3	697.51	6243.93	3304.05
28.5323	-388.992	8003.2	4253.64	7919.76	3013.84
1932.42	823.599	9104.42	6805.49	6831.05	8774.66
2541.47	2290.66	8491.85	7406.77	8291.03	7756.01
6165.37	1033.01	7447.37	4841.54	7475.25	7808.52
8343.45	-3.99509	6697.87	7816.57	6226.64	5829.02
4932.17	1630.45	7428.62	3861.22	7773.52	6883.49
-1943.19	1317.42	8623.39	4445.72	8104.59	7043.34
3130.34	4751.25	2041.68	7064.07	8032.58	3635.15
-1.98975	675.412	7868.81	4118.93	7570.28	2144.33
3513.01	3640.44	6076.94	6533.9	9077.51	3734.37
5894.31	34.1638	7604.14	6257.41	5640.15	7684.72
6336.69	2173.05	6511.34	5391.52	6357.89	5809.41
4682.12	3687.08	4482.67	4552.74	7209.66	4126.49
202.296	-891.952	6353.75	4793.9	7024.07	4221.08
3374.87	310.861	8099.82	3476.94	7890.46	5996.87
46.0287	4215.98	4510.65	5723.46	5545.91	7122.48
2381.3	1437.32	3290.95	3462.43	8053.53	3277.74
1836.32	25.3292	8781.78	3676.72	5806.38	3931.61
2272.14	1883.64	5361.88	5521.19	7270.23	6515.69
-1023.03		2744.89	2349.94		5768.54
2141.58		8065.67	8461.2		5679.08
2021.36		5275.38	5561.42		2150.5
1711.19		2571.02	5155.61		6604.09
3555.58			3446.4
5199.11			2490.96
2597.85			4357.24
1630.69			5486.36
1990.29			2994.49
1884.08			1728.5
7266.43			2682.28

## Sheet: Figure 6E
Figure 6E - Immune expression signatures from Thorsson et al.
IFN-gamma response				CD-8 T cells				TGF-beta response
YAP1-dependent	WWTR1-dependent	Compensable		YAP1-dependent	WWTR1-dependent	Compensable		YAP1-dependent	WWTR1-dependent	Compensable
1.0226	2.005	2.8734		0.030503	0.131193	0.072147		0.3959	0.3191	0.6438
0.7947	2.4389	0.618		0.06008	0.24636	0.041365		0.5347	0.4684	0.6361
1.7672	2.2355	0.841		0.127993	0.187168	0.052796		0.6386	0.503	1.1231
0.738	1.8429	0.532		0.030751	0.148677	0.071347		-0.1906	0.3524	0.9402
0.0268	1.6177	2.6668		0.074743	0.153506	0.055833		0.5405	0.3572	0.872
-0.5772	0.9232	1.2075		0.036771	0.189008	0.018536		0.1072	0.3112	1.2322
1.923	1.8766	-0.1719		0.023987	0.088389	0.064363		0.5709	0.2789	1.195
1.425	1.5941	-0.0056		0.194587	0.098566	0.063784		0.1984	0.1739	0.7094
1.2384	2.5661	N/A		0	0.294719	N/A		0.6705	0.062	N/A
1.8407	1.9478	2.0115		0.02404	0.068317	0.031827		0.7089	0.4312	1.0604
-1.0542	0.8832	0.5828		0.04567	0.039197	0.011065		0.4009	0.1434	0.3404
1.4571	1.4511	-0.693		0.06008	0.124727	0.062286		0.2993	-0.3283	1.1409
1.3484	2.0715	1.4962		0.090748	0.139408	0.090902		0.3017	0.3715	1.1565
2.2786	2.0502	2.2227		0.142663	0.174464	0.097516		0.4453	0.1193	1.1486
-0.0976	1.9657	2.0186		0.049928	0.238544	0.112176		0.7705	-0.0037	0.9724
2.1538	0.5598	1.3052		0.05017	0.022841	0.079895		1.1	0.1018	0.9523
-1.3638	2.3542	0.3749		0	0.240621	0.072575		0.8332	0.2325	0.6731
-2.6224	1.7561	1.3054		0.108944	0.329063	0.145172		-0.5378	-0.1808	1.1896
2.3885	2.1622	0.9416		0.10248	0.348827	0.085479		0.2211	0.4357	0.3368
1.6777	2.7732	-0.6322		0.04146	0.159599	0.029555		0.2797	0.1061	1.0619
0.4015	2.2284	0.946		0.123051	0.30739	0.045496		0.4587	0.3904	0.9015
1.6607	1.1495	0.0373		0.017161	0.112158	0.07567		0.7015	-0.2727	0.8082
0.2013	1.9643	0.5065		0.029117	0.085178	0.06283		0.8361	0.4517	0.6773
0.8519	2.3215	0.7912		0.219569	0.074033	0.045727		0.6423	0.5117	0.6228
0.8996	0.7952	1.1388		0.055905	0.134068	0.003823		0.0755	-0.0916	0.7656
0.6414	1.1794	1.8835		0.058966	0.057167	0.036198		0.463	0.0741	1.0858
1.6215	1.8545	2.1839		0.067187	0.133023	0.156189		-0.0253	0.6518	0.7404
1.4267	2.3509	N/A		0.017763	0.403562	N/A		0.4793	0.1014	N/A
-0.1828	2.1317	-0.7741		0.109807	0.091831	0.042923		0.2005	-0.17	1.3826
1.2263	2.3208	1.0841		0.051522	0.091139	0.069846		0.3889	0.1354	0.8161
-1.4599		-0.0026		0.025524		0.334585		-0.0209		0.0287
0.873		1.5811		0.348657		0.096135		-0.6254		1.0632
2.8652		-1.1074		0.113733		0.007037		0.0963		0.6308
1.6714		0.2727		0.073023		0.128598		0.2338		0.1993
-0.2764				0.117971				0.413
0.3679				0				0.9915
1.1555				0.057837				0.4159
1.786				0.165512				0.26
0.2018				0.021822				0.1628
-0.9337				0.127267				0.1285
-0.1158				0.034539				0.9357

## Sheet: Figure 6F
Figure 6F - PD-L1 (CD-274) MRNA expression
YAP1-dependent	WWTR1-dependent	Compensable
5.48234	6.73478	6.95406
7.29853	8.56174	6.36336
7.6775	5.36234	7.51754
4.08315	8.84347	6.92934
5.32612	8.96348	9.79119
3.7892	7.12149	6.28533
3.87483	8.85248	6.35151
6.82422	6.85446	4.93286
7.01918	9.58956	3.06688
6.4741	7.48677	6.18915
6.95525	5.02208	4.53533
7.33629	7.826	4.31523
5.78221	8.29144	8.44405
8.4992	9.83996	6.86941
7.01303	8.67808	7.72611
9.50374	3.75308	5.29529
4.7012	9.18849	6.58605
6.27664	7.68209	6.66564
8.21732	9.44058	5.2672
6.26676	7.77026	5.13042
7.65712	10.5683	3.13865
7.22554	5.08885	9.04745
4.92759	7.4756	4.93491
6.99739	6.77034	6.26287
6.06499	7.20373	5.9545
5.64231	4.49614	6.20565
6.08904	7.26303	5.87628
4.91891	8.11852	5.16696
4.65763	5.87489	7.04066
6.44359	3.74985	6.82294
4.11831		5.0879
9.00493		5.72864
7.59182		6.54888
7.00413		4.85449
9.20786
9.68698
6.93376
7.75302
3.42508
1.98674
5.7346

## Sheet: Figure 6G
Figure 6G - 18-gene T-cell inflammed GEP
YAP1-dependent	WWTR1-dependent	Compensable
3532.59	7972.79	7917.62
6890.55	9084.9	4348.57
7837.7	7733.72	7490.84
2221.45	8271.91	6493.41
2740.48	9179.57	8125.51
2155.87	8922.37	6321.79
5892.92	6754.34	6735.98
6840.52	6087.37	1138.91
6386.39	9620.85	4266.32
7048.96	6852.32	7189.87
1827.93	1518.8	2255.71
5517.31	7036.52	2381.22
6478.67	7960.23	9465.67
8745.28	9113.3	8443.63
4071.48	6572.51	8620.99
8914.07	2754.88	5087.71
2074.7	8506.93	6749.06
2131.34	9268.29	7540.18
8173.97	9243.7	3206.17
5673.54	8062.39	3243.18
7186.06	9552.33	4645.65
6977.96	4564.05	7885.91
5801.65	5975.53	4831.59
5373.06	6978.27	4002.6
4980.15	6770.3	4857.2
5165.6	7165.84	6646.91
5121.01	7409.51	6257.57
4430.23	9341.71	5634.41
2170.98	4657.65	4045.67
5721.89	7663.05	6112.37
2526.58		3912.74
9415.59		7033.06
7269.32		1942.34
4470.31		4784.12
4743.69
4649.66
4983.1
6939.3
988.12
1393.54
2568.98

## Sheet: Figure 6 - figure supplement 1B
Figure 6 - figure supplement 1B
Gene	ORL-48	ORL-204	SAS	ORL-188	ORL-214	PE/CA-PJ15	BICR10	HSC-2	HSC-4
DNAJC6	6.0743	9.80074	9.92571	1.72322	5.4336	2.68403	3.80382	2.53697	4.62188
URB2	13.8411	11.2949	10.8494	7.83885	6.39738	6.91583	4.51992	6.37391	4.66218
CHPT1	6.71164	3.28032	5.17691	2.2522	1.53284	2.36953	3.34701	1.78311	2.00419
ZNF695	2.14642	2.92072	2.51529	0.993335	1.79023	1.11231	1.09264	1.36406	1.55058
DACT2	1.54926	4.81529	2.8693	1.81247	1.05939	1.09209	1.09997	1.09209	1.36482
SKA3	25.4225	22.1794	12.6912	8.28046	6.59689	9.95811	5.43843	13.7133	6.20806
DIAPH3	22.6607	18.621	14.7484	9.52617	5.64837	5.38442	13.7434	10.4861	4.08874
ITPK1	26.8103	21.2715	33.8108	25.4865	5.67449	12.608	11.0137	11.2931	10.0735
NUP155	27.0829	22.6094	25.9988	12.7545	15.0476	10.8605	13.2985	11.7575	10.0348
TRIO	49.9164	38.3232	49.2032	23.3894	31.4041	17.2918	26.9612	18.936	19.2734
ALOXE3	2.5009	5.07755	2.74927	1.94512	1.31593	1.90954	1.44853	1.74981	1.69502
NOCT	8.02019	10.7197	11.9418	3.78289	7.41671	3.56891	8.00156	3.43468	2.67328
TOP3A	11.5272	11.5726	13.7831	7.10473	7.96265	6.96489	7.79837	6.53827	6.5306
TCHP	11.9522	6.2867	6.29124	3.71312	4.70097	4.17111	5.34282	3.33745	3.76327
AXL	129.526	168.931	96.5519	40.5658	24.8352	38.4728	222.253	29.403	12.3786
KRT80	122.79	34.9887	57.5597	19.9102	39.9083	36.611	27.1071	7.61599	26.6994
TFAM	30.5469	18.8279	27.5058	11.4139	10.7357	10.4433	14.0039	12.7759	14.3847
BRCA2	7.62661	9.32811	7.56672	3.49223	5.09344	3.36971	3.78582	4.51012	2.42232
MYH15	2.78015	6.93415	1.35357	1.06916	0.995332	1.38582	1.40337	1.50627	1.34587
MRPL1	16.0771	17.4072	9.02583	4.65082	6.63746	5.37415	4.0103	10.7862	6.05263
CALB1	14.6134	7.24722	3.48465	5.00678	1.82125	2.85365	2.61985	2.89239	2.40328
ZNF718	7.14718	2.88272	3.7858	1.49211	2.72748	1.22812	1.22924	2.55277	2.16841
RFC3	28.8262	30.1545	29.4264	17.4945	16.253	18.0111	14.0886	17.8899	13.8318
PRAG1	20.3229	5.47316	25.4738	3.54558	5.00687	6.89572	3.5392	6.5479	4.20904
MIR548L	2.54075	3.81762	3.61318	1.82038	1.50853	1.40124	1.53146	2.62894	2.0522
GEN1	6.5273	7.76789	5.37746	3.16345	3.57312	4.67197	3.28462	3.92323	3.1768
BRCA1	19.8782	14.6395	16.1196	9.01359	10.1426	12.1602	9.38331	5.68508	6.25463
GINS1	32.0663	22.1246	18.5633	14.0454	8.33459	12.3495	10.6301	9.66025	10.3067
LOC100506178	1.11829	4.46274	4.03241	1.00283	0.974208	1.18454	1.22053	1.13018	1.34962
ANXA3	32.975	59.5191	43.8973	20.9541	16.1616	13.2985	16.1484	20.8104	9.27663
ATAD2	65.7612	41.3797	63.0342	18.7363	22.9622	28.2092	36.1082	12.8649	17.6825
LRRK1	15.8753	28.6226	10.9089	8.7132	6.4002	4.72305	9.77187	5.50988	7.47383
PPP1R14B	87.7805	73.0618	62.5481	36.7835	21.8155	31.022	49.9109	51.8865	30.0983
PTPN11	118.64	56.8964	57.3849	35.0025	35.2365	35.1309	56.1792	36.3143	27.0596
TAF5	7.51059	5.6024	6.40545	3.71009	2.95098	2.94304	4.44853	3.25154	3.11065
EIF5	51.4439	53.2196	59.3785	26.4786	37.9436	28.2488	28.148	34.5498	28.2361
SLC7A5	1688.33	1515.26	842.99	807.372	398.909	494.713	241.23	1208	350.419
GPRC5D	3.7967	2.96327	19.5238	1.60274	3.42396	1.75138	1.79622	2.3761	1.78797
PUSL1	7.72296	8.02574	6.92628	3.86065	4.56696	4.48959	5.38976	4.41537	2.69592
LIFR	6.13329	4.40331	4.03401	1.62052	1.74268	2.02754	4.04032	1.42972	2.77405
KLHL23	4.24005	7.0029	7.01589	2.7716	2.02154	4.70154	2.79674	3.56921	2.2794
KNTC1	24.9073	15.7028	18.715	9.57483	10.1011	11.768	7.81431	6.5642	9.33956
FAM173B	10.3354	6.24898	7.05618	2.82533	3.31509	3.31616	2.3748	5.56115	2.9047
CHML	16.0577	20.0587	11.5296	5.53854	7.06073	8.94976	8.9157	7.5966	4.28962
RAB3B	4.70281	14.613	5.03604	4.30323	1.88774	1.64744	6.37178	1.19842	1.50668
BDNF	4.06238	4.5158	4.62564	1.11992	1.41457	1.77283	3.26119	1.53241	1.31275
MOK	4.89214	4.74903	6.68389	2.52289	3.46989	2.27235	3.65877	2.49929	1.45127
STAG1	18.8717	12.7627	14.0391	9.52099	5.13412	5.38622	5.9423	10.0346	8.66914
RPS6KA4	102.132	81.7496	43.0868	27.3341	28.4417	24.9667	18.6903	50.8208	34.5615
TONSL	20.2154	13.1207	8.6093	6.4763	7.464	9.88103	4.77076	4.62775	5.98034
STARD13	11.5995	16.4267	16.545	4.49372	9.06657	5.81942	8.57719	4.32797	5.95971
WDR43	34.3655	36.2793	45.6751	17.6997	23.3939	20.8148	16.3044	27.2851	19.573
ESRG	51.774	119.344	21.7375	24.937	15.1322	12.6984	30.6362	15.493	12.2891
CCT2	91.1275	88.2677	59.8925	32.9524	50.4288	45.6676	44.2301	40.2207	26.2902
C12orf75	33.9365	20.6324	13.016	9.28422	5.25381	6.94363	17.5017	8.87534	3.66644
IARS	95.9957	58.6765	95.7862	48.3206	32.6055	47.8245	45.8874	55.4766	37.1388
CLCN4	7.331	1.88486	4.26732	1.20846	1.47083	1.68245	1.49118	2.17112	1.8288
DDIAS	5.54881	15.7077	7.64251	3.46421	3.64123	3.34592	6.26371	6.14153	2.09255
CST6	12.7821	21.1759	11.6373	1.41673	9.06085	12.1532	8.35984	2.15913	2.14235
CTPS1	36.9948	24.9893	24.2	12.4828	16.6129	13.0762	17.3092	12.1746	8.95885
SCML2	2.38135	2.41736	3.52565	1.66382	1.29009	1.83753	1.10946	1.78224	1.36727
RAD18	11.5572	10.5703	9.71798	5.38122	5.30293	6.46106	7.8119	4.35002	3.03694
THBS1	591.765	3428.23	418.699	506.689	122.394	101.838	992.612	124.401	175.694
LINC01436	1.17671	2.22104	3.8574	1.38921	0.991935	1.0092	1.00992	1.0092	1.01424
FAM216A	13.783	7.36002	8.32921	5.46265	4.33479	3.06465	7.66009	4.98117	1.99903
E2F1	25.5512	49.1248	23.38	11.8503	10.6874	16.2621	10.1529	10.4849	14.5579
KIAA1549	5.61809	3.92282	4.34449	1.89678	2.88085	2.37019	2.95008	2.38279	2.62665
RAD54L	17.9069	11.5197	10.074	7.06695	5.44413	7.83635	5.39124	5.90188	4.55997
CYP1B1-AS1	9.14345	11.8037	5.79722	4.59488	2.27995	3.05534	5.6646	2.97319	3.00024
SUV39H2	9.62638	11.535	11.4748	5.63878	5.25373	5.31511	4.38591	6.41537	4.00557
STIP1	213.04	151.398	86.8772	56.2376	50.5235	60.0117	48.4983	66.7046	54.8917
NT5DC2	17.739	20.3795	13.1825	8.45591	6.81265	5.26685	12.1724	9.77742	8.81098
HYI	6.76179	11.3792	16.0631	6.03038	3.90189	4.13097	7.85078	2.76531	6.41765
FLNC	64.862	20.8933	5.06287	8.77465	2.72741	5.7801	14.1759	2.07948	3.37875
CDC6	34.4002	27.8836	12.0341	7.96824	13.8521	15.7295	8.21969	9.97236	9.90255
FUT4	2.79624	3.79619	3.53258	1.84995	1.87481	1.70059	1.4208	1.62649	1.63683
COPS3	42.975	41.8148	34.4552	17.6626	20.5402	22.7648	14.9651	34.0622	22.3165
TERT	3.64203	4.28322	4.33486	3.49679	1.89229	1.69177	1.48035	1.94885	2.06815
MCM2	80.1568	51.6956	64.0318	38.3355	19.4803	41.1872	18.7535	27.2607	41.0903
KRT18	246.887	236.067	194.805	63.9965	63.5882	146.138	61.6305	48.4623	164.356
NEURL1	7.36297	2.11938	15.6272	5.94244	2.44071	1.75002	1.56929	1.82594	1.48383
HGH1	16.1465	10.5453	17.2651	7.35832	11.1345	6.79395	8.04426	6.21662	7.51115
MCM4	92.8496	59.0602	75.8374	31.8074	39.425	40.6508	25.6139	40.7921	30.8341
MYBL2	125.76	65.2777	37.437	31.6455	14.7275	55.3802	30.7703	16.0458	35.5385
DCUN1D5	130.497	92.212	20.3907	13.3327	20.5482	22.0006	35.2018	44.3853	16.6764
CENPO	10.2832	9.82308	7.56721	3.71618	3.70316	6.69633	4.34771	5.25001	3.14852
SF3A3	41.1818	37.6515	34.123	20.041	24.2188	19.6168	22.2382	19.3694	26.939
C11orf68	58.2855	141.654	22.2361	25.6044	11.8843	20.4873	28.8865	21.7184	35.3342
CRY1	11.2263	11.5397	7.92147	4.33954	4.56334	4.33589	7.40071	3.22112	2.94405
NUP107	20.0045	16.2655	19.1581	9.41683	11.2351	13.1723	9.43025	9.93586	9.77124
CHMP2B	36.7389	18.0087	52.2438	8.90723	22.2942	17.8986	10.6592	12.2868	12.0373
ALYREF	60.1445	48.0389	32.4749	23.2047	20.9725	22.8003	25.675	28.6103	18.3398
NKX1-2	3.11473	5.62896	3.79436	2.57541	2.09424	2.54769	1.87701	2.00875	2.4136
FAM169A	6.70579	5.10627	7.80925	3.02149	4.26484	3.21492	3.91559	4.31473	3.53896
RNASEH1-AS1	4.41057	4.48188	7.13243	2.39356	2.15458	3.02694	2.64268	2.53562	2.75899
E2F2	6.1667	3.86551	4.94212	2.11718	2.89623	4.06595	2.34876	2.3723	2.54004
TMPO	65.0444	37.0495	24.5235	15.8575	16.4518	24.174	23.1697	16.9491	17.4801
OXCT1	22.379	20.9052	18.3706	8.35904	10.1437	9.9871	8.0243	18.7667	8.20341
PRKAR1B	12.1405	10.6207	13.7986	8.27518	6.34605	4.69648	5.85195	5.63007	8.41366
VPS9D1-AS1	5.63826	11.3853	18.531	3.78261	6.03224	6.00094	2.59654	5.50859	5.24835
SLC43A3	17.7432	13.8971	9.33087	4.85088	3.85473	11.7125	3.16802	3.11395	8.64403
NUP54	20.7768	23.9197	15.8614	11.7025	11.1244	10.9326	10.4718	13.2527	10.0566
TMEM123	607.483	213.231	59.2054	40.6675	85.2367	91.7729	110.741	78.8763	49.1925
CLSPN	24.0728	16.625	9.22763	4.18473	8.65505	7.6437	7.60703	3.96451	4.16903
DTL	21.9311	18.2998	15.614	9.00779	10.4558	11.3696	12.4836	6.08137	8.30567
PPP6R3	74.5573	44.4804	41.047	29.0584	20.6391	26.846	19.4078	23.6093	44.4025
SPAG1	10.6911	10.8807	13.9019	2.0769	7.90198	5.82965	4.50513	3.45088	3.85976
NOL9	10.861	6.60834	7.44428	4.14132	4.3784	3.67811	6.82853	4.02371	2.78368
ANKRD13A	34.6537	32.1342	23.2177	8.24198	18.0346	17.3641	18.2508	8.05797	10.4248
RAF1	20.7837	24.6549	29.9802	10.9546	17.2185	15.8725	14.6026	11.2277	14.4257
WWC1	29.7416	32.1531	47.0359	8.71115	12.9682	11.2267	11.4178	7.55632	13.5661
FRMD6	38.8426	38.3785	44.7905	20.2121	20.3297	16.5031	31.4057	21.5442	18.2965
CTNNAL1	119.162	79.2874	55.8205	34.2596	21.3474	34.9123	68.0865	24.1093	11.9107
RASAL2	17.0614	21.5444	22.1437	8.63575	11.7433	8.9775	9.5698	8.40549	13.0741
CERKL	3.57856	2.84293	2.66213	1.08718	1.05044	1.00939	3.46396	0.970045	1.28347
SGK1	8.69968	19.6037	29.6451	8.81633	10.7952	3.81636	6.66021	4.30906	6.60614
TRIML2	10.9848	13.9523	6.04562	0.992759	4.58683	1.24879	5.5085	1.38831	1.17072
CXCL5	4.39809	2.88551	1.1908	0.982436	1.00197	1.24503	1.1908	1.25753	1.23754
KRT8	291.032	170.254	150.478	47.8451	58.1903	123.527	58.4707	8.69645	171.21
EXO1	16.2367	15.3484	10.1134	4.77331	4.52824	6.79276	10.4303	5.04436	5.1236
SNORD48	2.5292	1.85791	4.76579	1.20694	1.20694	1.17454	1.94873	1.40304	1.15212
ANKRD33B	17.5341	6.28936	29.7678	6.52924	10.4228	6.21063	5.5107	6.44942	2.82044
KLC2	17.0352	26.9742	17.6399	9.70391	10.3283	8.42571	6.16708	12.8639	11.5183
H19	336.999	1.43947	1309.91	46.749	2.11126	12.7406	1.10764	39.4584	29.3178
PRKDC	185.224	124.386	121.513	66.6544	50.3347	50.7254	83.9411	60.477	43.4814
TRAIP	6.04387	6.40362	6.45149	4.08793	3.376	3.62158	3.73904	4.14246	2.72798
CCDC85B	21.9691	51.6699	21.5612	15.575	5.65364	6.57685	29.334	9.54138	9.08375
SNORD93	11.3923	28.7439	8.74524	5.041	3.26	2.67426	6.05921	4.77487	3.39171
DLEU2	4.56766	4.32061	4.70967	2.45218	2.01769	2.80908	2.06629	3.02342	3.00405
CSE1L	182.556	137.046	154.842	122.714	75.3566	73.9381	92.4113	88.9284	70.2627
DHX37	34.2498	19.2196	13.0959	9.47266	11.31	8.11708	11.8868	9.44201	7.29071
KPNB1	139.066	112.913	83.7011	61.751	61.869	55.9444	66.8307	56.3252	56.6889
PTX3	3.91423	11.7021	2.78033	1.38581	1.51921	1.30927	1.05078	6.29024	2.21836
ITGB2	2.4982	4.08946	4.48284	1.02439	1.60684	2.48972	1.70173	1.71246	1.3831
NMT2	9.39773	8.09813	19.3355	6.39759	3.58514	4.34137	9.02704	5.24431	3.58617
IFRD2	25.6631	26.5185	25.9348	15.7311	12.6813	11.6162	13.6163	18.0781	8.01874
SNORA71C	14.6445	30.0114	8.70468	6.97541	6.2129	9.27029	3.35863	10.5054	6.76087
AIF1L	10.09	3.28025	5.35035	1.49368	1.44688	6.12858	0.912999	2.37173	2.56496
NANOS1	5.45365	1.8841	18.3434	2.0791	1.28519	1.53046	2.6626	1.88388	1.42711
TRNP1	15.2567	8.52593	13.1211	7.49898	8.77331	3.76269	4.10736	5.51818	7.1391
AMOTL2	94.5645	60.1085	137.541	65.662	31.7363	36.3747	38.9641	34.3701	69.8274
AKT3	10.2299	6.42072	17.6324	1.7521	4.24916	2.85751	1.8217	7.00025	2.65728
BMPER	2.22455	5.49637	2.2509	1.03855	1.03855	0.959338	1.43865	0.948806	1.35469
MRPL37	45.8633	45.994	43.5675	23.8821	22.8534	23.8289	33.6811	26.7652	27.1391
POLA2	23.5419	20.8409	12.3005	9.24513	9.08415	13.7395	8.85123	9.36002	6.41753
CYP24A1	7.82997	10.631	36.4556	8.49792	2.49962	6.99286	2.38868	2.80873	7.43263
SURF2	21.3076	13.3193	24.1764	8.46522	9.59661	12.086	4.20565	11.5726	9.93551
TNFRSF10D	13.4806	10.112	8.01255	3.77995	4.2481	4.22103	1.46152	13.389	3.00561
FOSL1	112.706	243.808	50.6473	75.7378	24.9745	51.6868	80.7255	32.8014	3.63465
FSD1	2.488	5.75621	2.34494	1.10206	1.15127	1.8968	1.44813	1.13476	0.99524
TRIP13	37.9331	25.5684	23.6218	16.5737	11.7785	14.6084	15.8195	21.2087	6.31556
USP1	54.1505	44.7481	45.8274	20.1924	26.0597	23.6023	29.8216	17.1258	23.0943
USP37	5.79169	5.08921	7.70325	2.83746	4.28634	3.58955	3.13956	3.32653	2.57378
RBL1	15.3361	21.4433	12.697	4.68513	7.28188	9.02283	4.46571	6.92166	8.41471
DGCR11	2.71156	3.30462	3.03134	1.67185	1.79477	1.601	1.46621	2.04643	1.60146
HEATR1	33.8533	25.9771	22.7701	15.4775	12.3284	14.2773	17.711	15.8214	13.0136
TEAD4	20.5974	18.0938	18.0422	10.009	7.59801	9.49611	14.3907	4.47207	11.3293
FANCD2	17.3657	15.6683	12.3394	6.35807	6.80592	8.32174	8.92775	5.78187	4.15692
PARP1	65.3656	60.977	39.6476	17.0322	18.0426	32.3303	31.5828	30.1217	39.2654
IGFL1	2.60363	1.55533	47.5334	2.56867	3.34927	1.43562	0.958914	1.46266	1.2832
POLR3B	17.1226	8.02702	9.43323	3.36572	5.93271	3.35559	5.61792	6.38348	3.31349
DHX9	95.9673	91.2313	51.2901	30.4006	46.6941	47.8998	36.7106	35.1845	46.6874
DARS2	32.6788	37.5429	29.6888	20.8081	14.5548	21.4278	20.918	15.0405	15.09
SLC7A2	6.06307	5.9881	2.45502	1.16921	1.42252	1.36499	4.53064	1.41359	1.40247
CDC25A	15.7426	12.1519	19.4356	3.74028	6.9353	4.45391	5.01436	5.08732	2.8641
XRCC2	12.6208	7.56552	8.08632	5.4236	4.35558	7.70332	3.63055	4.68024	3.59495
SPINDOC	29.5281	20.39	26.6048	14.575	11.3624	11.0132	9.66955	13.1741	14.8088
HSPB1	44.9025	9.09216	100.425	110.986	70.7252	87.8843	80.9423	141.087	252.519
MPZL2	4.60737	2.68771	5.36776	6.50516	37.7664	18.955	2.09124	44.4587	14.4315
BBS2	3.61397	3.60017	4.20451	10.0089	5.88662	6.88823	6.72211	6.14884	7.37253
C1R	2.59236	2.97673	3.89079	16.107	15.8845	10.3922	10.4123	5.61701	26.1287
C1RL	3.50571	4.20983	5.88858	10.3353	17.3563	14.2423	10.1469	9.92756	22.6602
DTX2	6.41206	5.40932	6.87911	13.552	14.0863	9.20507	9.98603	17.7771	11.0535
REEP6	1.38414	1.59236	1.5387	1.74689	2.50992	4.05622	2.58366	2.94379	3.92062
COL4A5	6.28968	6.73751	6.60461	20.245	25.3609	12.1004	9.96496	37.3447	39.0634
PTPRS	7.50694	9.97265	5.71959	28.0421	13.7662	22.058	21.3123	10.6237	17.4281
ARHGEF37	2.93086	1.59796	1.91157	3.72509	15.7126	5.31998	2.22555	13.046	5.56512
PIR	4.33464	2.17403	1.53887	9.29052	4.35555	12.3309	17.0808	9.22037	7.85598
OCIAD2	6.10111	6.62982	11.577	19.0441	13.5104	22.0887	15.761	21.1616	8.59926
PROM2	24.1635	16.9167	16.1627	71.2884	44.4863	62.876	10.5368	117.927	81.8814
CD24	90.29	35.9796	9.1456	91.9665	284.22	102.696	113.049	60.5412	121.271
CHMP2A	9.22484	8.47985	9.73432	12.2921	12.7371	22.5228	21.3875	17.298	20.3656
DDIT4	73.9493	25.4045	39.0661	240.396	131.737	49.5499	71.9833	176.964	209.001
BST2	7.66903	9.65337	4.07002	7.27864	183.424	98.9886	16.6509	18.0358	137.361
AKR1B10	3.51638	1.13201	1.27439	11.0099	6.23062	6.12583	8.80036	5.49553	9.87403
SCPEP1	9.49306	13.7213	10.377	12.9416	74.9368	45.6804	27.7183	57.5315	53.1701
ITM2B	14.8242	10.6576	15.7919	19.7536	42.1912	22.5215	20.684	33.8174	35.207
MFGE8	2.49875	5.04894	3.24513	19.4849	7.38635	14.6893	12.2919	11.3176	10.0449
SLC22A18	1.60557	2.25237	1.70819	4.92829	2.87186	4.95261	3.42042	4.65795	3.57763
KIAA0513	2.53434	2.709	1.70171	3.56586	4.39689	5.69483	6.51117	4.15312	3.03959
DNASE2	4.7343	9.20565	5.39104	13.1757	15.2739	25.086	12.1608	23.866	19.9508
PIGZ	1.69402	1.80855	2.29912	4.79124	4.71348	6.3029	1.99116	3.21715	5.85322
ABCG1	1.24028	1.21875	2.57868	4.91767	3.57559	2.7909	2.22534	8.05914	2.68728
ATP9A	10.5432	7.24316	12.483	18.3914	22.2701	22.8502	12.4183	22.2626	15.6418
TSKU	8.73735	16.9439	19.872	26.1078	34.7827	20.9671	36.9507	36.2478	22.4323
PDIA3	45.6997	70.1466	39.0756	126.012	116.273	166.572	85.1914	118.493	174.045
LRP1	8.02023	4.26358	3.49004	35.7118	20.4414	10.953	30.4417	19.2441	14.9576
NLRC5	1.89235	2.41013	2.86017	6.26794	9.85894	6.76182	11.1741	2.2364	5.07573
NAGLU	6.98805	6.6963	5.37412	12.7874	13.6373	13.3268	9.36177	13.7263	9.67599
MMP14	61.7302	47.2475	103.535	196.366	136.234	103.246	207.614	134.982	106.792
LRRC23	1.24927	1.74416	1.5475	2.59594	1.97268	3.19079	3.34929	2.68808	3.38057
STARD5	1.49024	1.49253	1.36498	2.67407	3.34814	1.79606	2.46778	3.14309	2.84083
DHRS7	8.88749	10.9473	5.95806	13.6073	21.1464	19.7696	15.962	19.3988	31.2388
PAQR6	1.07947	2.61024	2.14686	3.49683	7.59191	4.22925	6.08887	3.0172	13.235
GSTK1	8.17737	6.30409	5.42582	10.9734	11.0814	17.9134	8.6697	13.3193	17.0986
ARRDC3	6.00962	3.49992	2.08721	8.0553	19.7132	11.0873	19.6005	6.84052	9.34599
BTN3A2	2.07552	2.70173	2.95017	3.92277	11.1518	7.47602	3.89881	5.55053	8.57297
GSTA4	1.55361	1.48057	0.81856	2.91039	2.00771	2.44511	6.83841	1.68246	5.55015
UBA7	1.54071	1.73899	5.36484	8.09983	30.1751	8.98089	9.96483	6.01393	20.2257
BTN3A1	1.68449	2.65739	3.53463	7.81479	15.3574	8.79762	5.68313	6.93662	9.66697
SLC37A2	4.73672	4.33477	5.99061	22.4211	67.2314	7.7421	25.5626	49.1387	8.56267
DGLUCY	3.54322	3.07275	3.03308	4.75778	6.07783	5.53501	6.00258	5.50103	6.35854
THBS3	2.7761	3.03808	3.6778	9.43953	7.31491	7.43853	6.62324	6.77437	13.0238
CHMP1B	8.70407	12.3004	14.3795	25.0018	18.0265	26.4356	24.4619	17.3299	19.1675
CD82	12.1639	13.6033	11.594	20.4452	30.8891	31.2667	14.4225	56.6521	50.18
GBP1	3.09688	4.20001	5.86827	9.97773	38.2891	14.7508	18.6191	4.6597	14.1281
ORAI3	1.86016	1.65325	2.78829	5.53288	3.56145	4.52981	3.67863	5.28005	5.18674
CLU	4.92997	1.88926	1.77207	4.17463	7.56766	7.45886	10.3275	12.5891	5.25634
SDR42E1	1.50246	0.983411	1.17861	2.07686	3.50176	2.7486	2.05046	2.93323	2.84352
TMEM173	3.90835	5.45532	4.68148	8.75781	13.8266	13.173	10.4934	13.8553	8.30703
ING4	3.46675	2.12065	5.67431	5.51388	8.6092	5.86226	5.99578	9.24348	9.5466
TRPV4	3.06188	1.35513	1.58617	2.04535	8.56482	7.15318	4.70743	4.83595	5.90232
GPCPD1	4.17619	5.59667	4.7713	20.9141	9.67166	16.6156	4.97776	17.6838	9.9802
GJB2	6.91582	1.53846	3.08172	8.68507	30.7689	4.73763	2.50081	88.4845	18.6776
STARD4	7.05772	8.88996	5.46628	10.1148	18.0486	11.1875	18.0233	21.8448	10.6229
PGAP3	3.56087	2.71818	3.19554	5.44963	6.9323	5.17207	4.09617	5.54892	7.43518
NUCB1	16.5392	17.7493	13.646	26.9977	25.8874	49.0604	36.4183	31.6495	30.2512
RNF145	18.9977	19.2529	11.7259	35.155	70.9691	30.9399	29.1275	51.0573	32.6609
GBP6	2.71385	0.947926	2.70553	9.537	22.6531	2.11045	1.69085	16.7756	14.8632
VSNL1	2.03186	1.04132	1.16103	2.16636	4.87504	2.8948	1.10539	9.04704	8.53488
TSC22D3	3.51487	4.03171	5.5877	88.8894	14.0154	14.356	19.345	30.9402	18.7196
APLP2	40.5972	48.9212	44.3353	63.0048	193.842	109.932	124.834	154.061	99.8178
PLCH2	1.3023	2.8295	1.93513	9.99901	9.22994	2.89682	1.70062	12.0295	5.22775
HIST1H2AC	6.71994	6.4279	2.3877	17.6885	19.5926	15.8019	5.79597	18.0179	34.7654
CRELD1	2.91526	4.48495	4.15301	6.27167	10.3705	5.81596	5.3665	8.30996	9.20603
DMPK	4.71641	3.52593	6.54528	7.20241	12.199	12.4959	9.57624	5.96307	10.1325
BTN3A3	1.71964	1.7098	2.65799	5.20104	12.2886	4.56741	3.02748	3.78122	8.03933
CMTM3	2.61687	5.33232	2.59215	14.7257	6.46263	4.45963	15.3625	6.45417	5.17091
FAM234A	5.36311	4.25454	4.36283	7.99515	7.78769	10.8092	8.84323	7.73878	8.14185
SMIM14	2.20109	2.00129	2.77244	4.70971	6.66812	6.88567	14.9821	2.87957	2.84757
UBE2L6	5.4764	6.0597	29.5606	15.7165	102.766	55.6353	24.7157	18.0415	55.3994
ATP2B4	13.1095	13.3106	13.1059	22.6478	31.3161	28.1224	34.8793	16.5258	39.9463
TAPBP	26.2528	20.6995	37.0772	54.0402	81.9551	58.9003	50.0681	42.6316	50.7577
CYP4F3	1.42682	1.06451	1.05307	1.95529	2.46257	3.26967	1.63599	2.12015	3.18255
GPRC5C	1.50298	1.34052	2.09183	1.82737	4.20811	5.16389	3.22017	7.07924	3.32555
HIST1H2BK	7.18113	5.95373	1.77462	17.6792	9.22494	22.8114	6.40566	27.9194	23.9254
KRT15	3.54161	3.83817	8.69168	15.8066	173.707	76.2132	5.18496	146.627	205.189
PSORS1C3	1.85906	1.10063	1.35256	2.96655	4.72333	7.09406	2.32943	10.3868	1.89882
UBQLN2	8.45826	6.47178	2.7554	8.12428	22.3258	10.605	16.8763	11.5556	13.3031
IFITM10	1.13817	1.18481	1.14509	2.22151	1.72471	3.43538	2.08549	2.88079	3.9862
TSPAN9	3.84903	3.96928	4.20875	5.98626	9.54866	6.40555	6.34691	10.2176	7.17113
NOL3	4.1255	5.1829	4.31647	9.98168	8.54484	8.41772	8.53301	5.85334	10.4955
FAAH	1.26107	1.38375	3.99194	5.06492	7.80938	7.42899	2.51981	4.16205	13.2605
ATP6AP2	18.953	17.0671	16.2493	19.3023	36.2739	49.3203	42.9788	27.1909	44.469
TP53TG1	3.88301	2.35488	5.1665	8.90873	6.95622	9.41238	4.29899	13.6075	16.709
NCOA3	25.2985	17.1993	17.4735	45.6943	30.4241	30.4782	34.0435	32.5993	38.9351
STAT2	7.036	15.8369	10.4636	17.3967	54.3056	35.5417	21.1292	14.051	24.2475
PORCN	8.57498	6.62741	5.05787	23.1049	15.1086	10.0988	11.5901	14.4611	11.5311
MAN2B2	6.56434	3.9578	4.4703	10.7013	12.5967	12.4856	9.30101	9.89063	7.11892
RAB27B	3.56106	2.58321	2.92184	6.39174	13.048	4.54979	18.0502	5.26044	5.52386
LPAR6	1.32142	2.06545	1.36751	4.29797	4.04984	2.92735	3.3201	5.4034	3.83173
DTX2P1-UPK3BP1-PMS2P11	1.82923	1.28775	1.47095	2.73271	3.16748	2.9235	2.07498	3.02738	2.39291
ST6GALNAC2	2.31765	1.2926	8.69321	12.6628	15.731	9.4891	2.05049	17.1638	7.12199
ZC3H12A	5.28523	8.2444	7.80489	20.6669	19.6085	19.9068	8.98746	20.818	17.1621
MIR570	14.8034	8.56905	11.3862	32.9321	36.2217	27.2503	14.5691	19.5199	37.1654
TMEM8B	1.45649	1.78022	1.6647	4.12057	3.55002	2.08622	3.47767	3.30234	3.74819
PBXIP1	4.75313	4.79203	9.36386	14.5114	18.0172	15.3567	17.1667	9.42427	22.8441
TMEM219	4.82883	7.08021	7.76163	17.7395	12.9774	16.5867	13.6006	10.4677	13.1627
TMEM229B	1.20025	1.29901	1.56318	2.97133	3.75838	1.90379	2.24378	2.24153	2.79311
YPEL5	5.89665	8.18238	10.9707	12.3711	18.2654	14.5578	19.3524	11.8576	18.0172
UPK3B	4.21341	2.81335	2.44942	16.7925	4.07604	15.5517	2.70413	6.17647	18.1997
CDKN1A	7.94013	17.1336	13.2195	19.0527	67.8626	29.3789	12.3157	38.5535	46.2775
RADX	1.84146	1.21035	1.19517	2.738	3.0346	4.44072	5.34264	3.12158	2.21086
LAMP2	32.4944	23.4279	23.3543	36.7959	37.5524	54.2488	70.134	54.1761	48.0348
CCDC146	2.05359	1.25261	1.66175	3.30744	4.04137	2.19438	3.59354	3.44331	2.83515
PTK7	12.86	19.6143	15.7113	28.9595	38.2268	26.21	26.3424	32.4867	23.5391
MIR548AN	1.00972	1.00972	1.01323	1.90464	2.47287	2.29821	2.58588	2.33483	1.36753
SLC25A28	7.35839	11.1332	10.1311	21.7854	19.277	13.0562	18.7887	15.417	16.3574
SCD	58.2654	106.031	92.1044	570.539	211.929	239.694	315.602	290.404	215.379
DCAKD	6.68373	4.35144	7.17407	17.1641	8.58068	11.6325	13.7672	10.4027	14.4389
TMPRSS4	1.25902	1.03697	1.47361	1.31123	15.3637	12.4734	1.13228	8.94036	5.2036
GM2A	9.97188	7.42732	5.49935	19.6155	30.0508	17.6265	20.2334	47.8638	14.4717
PLD3	6.41284	6.60847	6.4267	21.9188	17.4757	19.3663	22.3634	19.8531	15.7713
APOBEC3G	1.24622	1.3539	1.49118	2.44486	4.42966	3.56998	3.47245	2.97751	3.02592
CRYL1	1.94679	2.09708	2.77619	3.94826	4.32867	4.70086	3.18037	5.71868	10.7654
PPIC	10.9673	9.63813	5.11022	14.2903	22.085	26.6852	22.5779	16.1598	18.8721
FAM114A1	6.40987	5.91573	4.57347	16.586	14.3111	11.9802	26.2954	10.9902	7.16537
LOC101928837	1.21197	1.37222	1.7259	2.12386	3.05719	2.56665	2.15225	3.14119	4.33084
LYPD3	4.85782	4.89933	1.94008	5.0473	27.3008	46.975	7.69245	11.611	15.7839
MANBA	2.26092	1.86739	2.48727	4.98598	3.74765	4.09434	3.08415	7.31328	4.90684
SEMA3F	8.44587	5.21269	5.21488	18.3999	19.1738	18.6292	8.9209	24.3101	23.1127
GBP2	1.20934	1.4771	3.2453	2.78252	7.60036	5.9097	4.30755	2.06851	8.49015
HIST1H2BD	6.16515	5.7413	1.64659	10.9665	10.9547	10.7094	5.2532	11.8999	25.47
H2BFS	4.02805	4.14449	1.53	9.60978	6.30487	9.82521	4.88314	12.0001	10.557
RRAS	6.43681	10.2616	5.63946	18.3776	12.2068	18.4291	33.373	19.0649	21.129
DUSP16	4.14155	5.93457	6.74816	11.1209	14.3539	11.3031	8.84469	9.09137	10.388
SAA2	1.18028	1.32953	3.86083	5.473	17.5288	6.10181	2.32202	14.9917	2.51136
SREBF1	18.0833	14.705	10.0582	59.114	42.1916	38.1539	21.1954	50.2204	30.0969
PPIB	36.634	53.8385	27.574	63.7468	63.1248	89.46	51.6967	80.5025	108.766
NINJ1	4.5721	2.28156	7.61572	10.3922	15.3891	13.8517	16.7635	8.37655	10.5633
GPX2	2.80091	1.42197	1.26527	8.93988	3.04577	11.8543	1.09634	6.4423	7.04762
ALDH3B1	5.02647	3.73378	5.2519	20.1863	3.79946	15.8974	11.5966	7.02495	23.1102
RALGDS	8.05749	5.09265	7.2211	15.5603	22.1681	13.2525	7.56518	16.8533	16.1441
AKR1A1	7.84637	7.62215	8.47088	17.3351	16.5271	19.2973	12.429	19.1626	20.5411
TRANK1	1.43079	2.35272	2.66968	3.33434	26.186	5.76866	7.15493	2.22836	5.57551
ODF3B	1.52527	1.9123	2.45323	3.91523	12.2988	5.10711	3.50055	3.30386	6.33711
CTSD	50.3655	46.3672	47.4677	119.751	218.326	258.039	69.6846	249.728	129.648
APOL1	4.44189	7.63621	9.45118	7.28127	69.4555	39.7266	20.1316	8.70302	17.8888
PER3	2.80036	1.24087	2.52683	10.0204	4.24946	10.1829	9.1612	3.73026	4.3548
TMSB4X	37.265	48.964	55.2787	88.6749	91.7706	275.537	209.578	197.849	108.918
S100A6	41.1006	57.7778	51.0225	131.73	66.68	183.266	375.843	101.579	160.347
MAGED2	8.45548	12.0702	4.80433	21.6676	17.6351	19.1642	31.9159	16.9075	19.5773
TRPS1	1.60824	1.85661	1.35914	3.11743	3.55346	2.58258	5.9658	2.15526	2.9321
TM4SF19	1.64076	2.25382	1.64698	6.78888	2.21403	4.9912	5.3149	3.52412	2.66506
ANXA4	4.74113	4.08363	4.1029	7.03353	8.38	10.6791	7.42067	9.71018	11.6407
ARSA	3.4573	6.25934	4.76485	7.11761	13.2391	12.5404	6.86276	9.08565	7.67407
MT1X	3.5266	3.13074	4.30054	31.7337	7.53827	16.6948	1.95524	34.5917	39.2358
DNASE1L1	3.18896	3.3339	2.5647	7.50499	5.25581	6.08963	7.4109	8.64812	5.28636
TIMP1	6.54097	9.5995	9.91755	23.5234	19.2979	28.262	42.8837	15.7306	17.5223
TMEM63B	12.4624	11.4456	7.8439	25.6363	41.605	16.4634	22.7139	25.6037	19.9988
PCSK9	9.57536	4.77564	1.53139	7.0544	27.7462	27.9508	5.77422	29.6153	16.9268
APOBEC3F	1.31084	1.38961	2.35149	2.07561	5.49055	4.38605	3.72077	3.08003	3.70999
HSPG2	17.6036	12.4947	13.7776	31.365	77.415	47.5683	41.9828	45.0725	15.0695
DEPP1	1.33786	1.84291	4.51542	6.67146	49.1614	2.77435	16.7087	2.89178	7.38251
PRNP	38.1995	89.189	79.4768	222.098	142.221	122.145	93.8384	181.589	113.855
INSIG1	9.97074	19.3112	10.0782	32.7789	22.4363	44.2644	56.3253	16.7701	19.7084
TRIM5	5.68607	11.5949	4.17368	17.2173	26.1907	17.1911	8.15307	16.0278	17.1731
HIST2H2BE	3.09598	2.08097	2.14086	7.10844	10.3455	9.23107	2.22462	5.24227	13.9126
BLVRB	6.2916	6.75178	4.7649	9.45421	7.28786	22.1454	22.7469	9.15463	15.6906
TOB1	14.7309	10.3468	8.57362	33.0887	20.1293	15.8658	20.7496	20.1518	31.9766
IVD	1.24364	1.24149	7.06697	8.83665	7.86853	7.34005	3.414	4.09927	13.5569
SAT1	16.2306	14.4011	24.2265	46.8026	120.77	58.9641	28.552	59.0948	125.63
TEF	3.70424	3.16882	3.98095	9.58137	5.26406	6.56804	6.83196	11.5173	7.73027
MVP	8.95693	15.6219	9.12335	19.2572	39.2011	27.4521	38.7914	16.2825	23.8069
TCEAL9	11.0313	22.6554	15.5481	26.9787	28.4961	32.7314	37.6476	50.6605	43.3481
TRPM4	3.65075	3.83904	1.91094	7.18008	5.09248	6.8925	6.01632	10.4705	5.49902
SPRR1B	10.3682	0.850698	1.28262	6.71064	12.0416	26.2031	1.27405	15.7982	14.2977
LTB4R	4.51267	3.9852	4.0715	7.25503	9.13539	10.2029	5.98125	5.91472	15.8038
ZP3	2.0567	1.63867	1.6894	9.58537	2.36609	4.47948	5.63404	3.10313	6.42028
CERS4	1.43212	1.88747	2.10808	2.2219	4.47369	3.18942	2.48229	5.34359	8.57428
AMTN	1.4575	1.11435	1.34189	5.87796	2.64666	1.57673	4.13468	5.13664	2.52107
PIK3IP1	1.3609	2.24846	1.44298	4.52822	9.60409	3.71213	2.9869	2.92128	10.2985
B3GNT5	14.2316	12.1935	12.6411	41.211	42.5514	16.891	8.50059	14.2977	21.7716
CDH3	59.8028	45.9333	99.6761	162.403	469.355	140.011	7.14777	115.98	134.093
ITGA5	25.1527	39.9748	13.48	159.192	65.5829	45.1257	59.2603	18.6834	18.3114
TGM1	7.41599	2.07282	5.89234	20.8362	23.4971	14.9081	2.01026	3.02827	14.0224
KPNA7	1.08042	1.37698	1.10567	2.91743	3.80308	1.91806	1.2345	1.61822	1.3606
ARSI	9.12989	2.75606	7.56628	35.5955	13.6161	13.5557	6.14724	13.2774	4.22468
PDZK1IP1	1.1053	1.13769	1.38973	1.35052	7.39352	8.8266	1.76383	1.72992	3.58063
HES2	4.35975	2.75839	7.09063	7.92706	37.7125	14.7636	2.21324	13.2585	9.01245
FAM3C	21.4907	21.9652	61.0962	75.3607	139.896	60.4542	15.9602	54.6121	41.4199
CALML5	1.11686	1.02148	1.2528	17.6335	1.32956	3.94421	1.2528	1.33625	1.58815
S100P	2.06491	1.26669	1.13326	1.28088	14.7501	37.644	1.01692	6.59718	1.22916
C15orf48	1.46632	0.992324	1.03969	1.19124	5.99397	17.2573	1.0463	1.09993	1.21868
SERPINB5	60.4321	23.7364	19.8986	164.19	147.056	52.2106	21.2026	60.9605	43.0828
TMBIM1	20.6179	27.1511	33.4982	59.0984	74.2689	65.8188	25.2006	54.4507	40.0096
CEACAM6	1.23981	1.05724	0.965421	1.06944	4.58378	4.88254	0.965421	1.19965	1.13588
PCDH1	17.651	4.23354	36.1985	14.1003	103.005	42.5035	4.11488	16.7138	16.5615
ALOX15B	0.935807	0.923966	1.24763	23.9478	6.32495	1.25971	1.24863	1.41112	1.25166
PLCG2	1.30769	1.67681	1.70704	4.38372	2.36789	3.36651	1.91408	2.09973	1.83563
ANGPTL4	4.98982	10.7067	1.92148	12.0379	74.6497	3.39677	3.6572	2.31253	2.9984
SMURF1	14.8532	13.9026	12.6168	24.7145	26.9167	27.3031	12.6639	19.1291	16.051
CMPK2	1.05587	2.01754	2.3286	2.75089	38.4971	18.0816	2.02185	1.70683	2.81351
IRAK2	2.87468	8.28795	4.90013	8.14793	21.2535	15.4134	4.75631	5.07733	5.53377
CLDN4	6.57503	3.41003	7.39028	7.07049	49.455	42.8566	2.25937	2.81364	32.7897
ACP5	1.56163	2.04873	1.8468	2.18192	5.27962	9.42739	1.21949	2.20415	2.1368
USP31	7.92675	4.89258	3.37835	19.6391	11.704	10.766	6.98344	9.68972	4.56437
KRTCAP3	1.90956	1.73281	1.53386	10.1102	2.02064	10.5474	1.1914	1.35398	8.13682
KLK7	3.36771	1.22953	3.65285	4.62969	156.67	17.887	1.43011	1.66573	4.09554
RNF223	1.67271	2.13021	2.47094	1.44007	6.55449	7.92666	1.16724	1.5084	1.70682
SUSD3	1.40261	2.17428	2.00288	2.55158	3.23574	16.4871	1.29949	1.1709	3.46308
KLK8	2.62133	1.56723	4.10437	11.1946	22.2191	25.6198	1.1225	2.42063	8.91943
MAOA	2.74928	4.67647	3.20054	23.8756	11.7882	7.69871	3.98805	2.7202	8.52001
GRB7	3.95722	3.95574	28.203	25.7546	30.0177	12.9681	1.85121	4.98063	8.77867
CYB5R1	7.39085	5.45333	5.28154	9.75367	22.4251	12.3576	6.92605	8.60232	8.93123
FOXA1	2.93712	2.05455	2.27042	5.80193	6.96338	7.07809	2.02562	3.98253	5.49937
IGFBP6	17.3805	14.4061	16.1764	76.8522	68.8624	76.2382	22.104	33.9569	12.7003
TRIM31	1.07265	1.01156	1.10222	1.1467	2.49655	20.7416	1.06768	1.29745	1.13528
GRIN2D	2.81563	1.75378	1.25482	5.03249	1.62194	9.94342	1.92293	1.21119	1.61851
DDX3Y	1.14514	4.2656	0.884512	29.1757	1.12205	6.05317	0.884512	3.99469	0.918698
MELTF	5.04636	4.93972	12.3957	16.1265	11.4331	25.0439	7.52752	3.63415	5.6901
B3GNT7	2.01042	1.23303	1.22205	2.12898	3.72025	3.08532	1.37671	1.15159	1.24838
NECTIN4	2.92657	1.85153	8.22544	7.95814	33.559	16.1562	1.54486	7.08646	25.3583
TFCP2L1	2.97975	2.16392	6.15519	51.9226	9.85208	8.31293	2.78661	3.78441	4.2177
CALML3	2.45869	1.41852	5.07505	6.04668	14.2926	8.20844	1.16207	1.2389	7.88708
ZSCAN16	1.06071	2.4715	1.11163	3.18353	1.98149	3.24631	1.19658	1.48418	1.16824
CD74	1.06331	4.39177	11.2706	3.8756	18.9652	9.57886	2.14635	2.31065	2.36792
PLSCR1	10.6065	22.3396	19.4836	45.0801	71.3121	70.7103	15.0293	21.0987	41.0641
DBNDD1	1.70819	1.76655	2.28362	7.86185	3.31851	3.0789	2.20629	1.75566	2.02208
TACSTD2	59.7324	55.6706	258.63	406.249	821.938	430.851	59.7819	144.838	217.126
KLK5	11.1574	3.14082	64.9082	34.7618	189.764	30.6226	2.7356	92.3106	4.05386
POMT1	4.24851	3.41856	2.74637	6.04421	8.16595	7.92695	3.60181	3.5291	4.51713
LRRC8A	30.5632	19.9882	20.5078	53.6798	71.524	42.4783	36.0168	44.3058	22.0834
CD40	0.920184	6.64201	2.39966	5.30824	11.5997	18.843	1.42801	3.08978	17.7817
LGALS9	1.03232	1.14097	1.04254	1.4302	8.38655	6.44813	1.2104	1.21059	4.36578
CTSV	16.2161	8.83575	4.02396	11.1782	24.8602	26.0578	2.33954	10.9538	8.57718
MOCOS	8.07562	4.96176	9.53205	14.7655	10.5808	22.4417	10.9882	4.19583	5.31838
RAET1G	2.9772	1.67996	1.62333	8.96047	9.70505	3.50082	2.44827	5.34591	2.56913
TAP1	13.5751	18.6904	13.8825	31.658	118.724	46.2406	11.5214	15.5572	38.9432
NRIP1	8.13208	12.2158	12.3106	24.6505	40.3157	23.884	2.84826	16.2504	6.89783
CA2	14.7936	2.49941	4.03233	19.53	22.0334	42.2239	2.2704	16.16	9.01838
PMAIP1	10.1473	21.0386	22.4302	56.3279	43.5834	29.4859	31.8589	10.6907	17.8201
ISG20	1.09699	1.52728	1.53672	2.37562	5.23011	3.25024	1.7358	1.3182	1.66944
GCA	2.04829	2.69117	1.74107	2.923	8.93747	9.1803	4.43431	2.78301	2.50773
RAPGEFL1	4.01174	3.76108	6.0087	12.3607	13.7987	14.2187	3.28574	7.12664	12.81
HSH2D	1.0742	2.85622	1.4159	2.83768	10.5851	8.59023	1.28767	1.41539	3.36326
CXCL11	0.958594	1.74793	1.68409	2.55853	59.4554	2.07633	1.66581	2.73333	1.70997
PRKY	1.05898	2.15507	0.962039	8.04683	1.05898	3.33716	0.949048	1.50425	0.949048
LIPH	1.56056	1.07863	3.0194	1.16212	14.1987	9.22028	2.19765	1.35564	1.62125
EGR1	12.7115	39.4143	87.9641	138.207	111.239	50.5844	8.47556	20.4939	66.457
CLDN7	16.9654	6.91237	19.6956	53.726	29.5188	60.9487	2.29667	14.4659	21.9553
NOMO2	4.41971	4.78929	3.81183	7.53259	11.9451	10.1854	3.97504	7.55967	4.4866
ST14	8.78066	12.4935	29.2668	16.9731	193.807	80.2172	3.1986	45.2491	56.6111
SAA1	7.95212	14.0711	18.5019	99.9313	146.704	52.5193	6.25387	77.3121	11.9622
RTN4RL1	2.14758	1.48028	2.03998	5.31931	2.34758	4.92602	1.70565	2.47928	2.31973
COX6B2	1.14351	1.42188	1.88787	10.2527	2.28571	5.29351	2.86101	1.44333	1.40786
IFIT2	3.16923	21.9235	105.031	52.4671	211.024	43.6521	14.294	11.7356	19.8278
TMEM171	4.94239	4.11654	2.41193	8.29419	10.5317	9.0582	7.12485	6.25278	1.88526
TMEM140	7.20415	6.33083	8.50612	10.2073	18.7901	14.5672	6.62188	5.7516	8.78977
CALML3-AS1	1.40721	1.34917	3.27765	2.58737	7.84474	6.1088	1.20837	1.28809	2.1458
SGSH	1.8802	5.52595	6.7052	7.98198	10.4859	6.30201	4.12235	2.09229	3.46491
PPL	38.5559	11.6625	24.457	76.9051	56.4032	58.7571	7.37809	22.1458	54.4551
HERC5	2.68461	3.45782	3.24256	15.7462	17.6847	15.3937	10.3053	1.74445	2.30323
VMP1	22.9411	38.485	35.9963	51.9598	58.8216	51.0922	35.8217	21.1729	25.2398
STEAP4	1.7557	1.15094	3.20637	5.42353	5.17142	4.88061	1.30076	1.20404	2.10476
SLC17A9	1.16198	1.04257	0.980502	9.21149	1.02281	1.96254	0.980502	0.999057	1.0479
IL4R	14.4114	10.9547	14.7026	23.4828	57.2896	28.6704	15.4782	19.4113	8.25941
RNF225	1.13611	1.07555	1.32382	2.85268	2.57726	1.64244	1.34359	1.36593	1.4592
ALDH1A3	8.17483	12.7129	19.483	65.2694	48.4981	103.778	5.00036	55.3208	10.2783
ADAM8	5.5241	5.8931	3.72863	7.4582	12.5878	24.7543	4.9384	3.32322	8.89397
OAS3	9.78949	70.9065	14.3462	74.1544	338.397	152.552	11.9638	29.8914	126.847
CHRNB1	3.28592	3.42768	1.65752	6.70611	10.2888	5.34047	2.48781	3.11776	3.8252
FBLN1	8.94055	5.9082	8.08647	12.8949	19.9243	39.2396	6.32727	9.91743	18.8333
LOXL4	3.26857	1.94805	11.7463	44.672	1.86451	64.0609	1.82272	2.73637	4.75168
LARGE2	3.81644	2.69573	3.24768	24.2359	10.3038	6.18733	1.62524	16.5519	3.41671
KLK10	14.2206	1.39316	9.55475	12.8207	32.8625	30.5089	1.11231	10.3238	8.88506
IL32	3.42265	4.70923	2.87909	8.52247	12.9801	11.855	3.39919	2.42191	6.58875
LINC01629	1.11271	1.01804	1.18668	2.38947	3.8617	2.61331	0.996503	1.24727	1.00071
ITGB6	18.8602	11.2258	5.04103	71.6784	40.5407	49.446	3.05925	38.997	23.5035
HLA-B	6.27127	14.4176	30.3663	101.45	420.829	138.746	5.521	6.72415	125.208
SDC4	70.5394	100.848	163.459	295.341	193.89	189.369	82.2518	143.73	135.567
KRT87P	1.25656	1.46349	3.01697	3.54817	3.29085	4.57371	1.39813	1.37968	1.35628
LAMC2	86.294	365.317	131.125	258.306	1823.54	257.047	107.086	214.093	118.676
RNF19B	15.7537	9.29026	16.3941	33.797	36.5975	24.1156	13.177	26.1895	10.8289
LY6E	27.9548	41.7341	180.521	156.59	267.247	210.613	40.8849	32.546	93.7671
S100A14	29.873	10.8673	93.6334	76.6455	196.488	129.576	2.99324	97.4012	72.5568
IRF7	2.4652	16.1368	5.74423	11.3678	51.8875	21.8602	2.46955	4.55722	27.8495
SERPINB13	12.5748	1.461	8.75228	42.0077	28.3801	16.7269	1.70798	12.2163	21.2194
DUOXA1	5.48401	5.56857	2.18248	11.8718	11.1794	15.8627	2.41955	4.26753	10.2046
SCNN1A	35.3776	12.797	26.5771	51.7842	86.684	87.2985	5.93385	17.6254	39.7157
N4BP1	9.09184	11.2872	9.11526	15.4468	25.3298	15.7094	7.47892	9.19589	11.1574
MAPK15	1.80522	1.26964	3.25869	6.9663	3.94417	3.66478	1.48745	1.33879	2.27806
DPP7	7.00696	4.44614	15.304	30.1725	10.0098	32.2598	8.23817	5.24348	16.7818
DDX58	5.46037	34.9618	4.47798	24.9423	105.85	26.2307	13.4409	9.01369	48.5014
LRG1	1.30598	1.16621	1.35496	1.69629	8.17081	6.94188	1.05609	1.18208	4.13869
NFKBIZ	3.50694	6.119	5.36612	11.3725	11.1102	16.2779	4.53818	9.29499	6.55676
ETV7	1.09553	1.14472	3.43174	1.96977	9.35719	7.51391	1.48249	1.36985	3.88303
HERC6	3.39314	6.85429	4.75641	10.773	46.5352	16.3068	5.26444	4.59664	13.9738
PLEKHA4	2.11014	2.78732	7.84625	10.688	14.1411	12.7881	4.83758	2.02161	5.31294
CA9	1.77276	0.911958	2.20285	12.4509	22.0484	1.46307	2.11981	1.48733	3.17187
HCAR2	9.73024	1.85635	10.4944	36.011	106.931	22.7728	2.33063	10.0221	43.5398
UNC93B1	12.282	16.7782	11.5544	36.8564	26.9191	31.1935	9.79941	16.5939	27.8156
MXD1	4.15295	3.38285	11.0894	10.7368	13.6735	10.8857	6.46709	6.05175	3.30605
AIM2	3.69222	1.91083	2.1553	5.43164	32.7457	11.0204	3.04298	1.68967	3.62669
SLFN5	12.6472	18.3998	20.1338	26.4578	68.1004	33.2125	18.0236	17.8186	30.5055
TDRD7	7.48158	9.87097	10.3015	11.9348	37.3638	21.5855	9.46553	7.32374	10.2044
USP18	1.45383	6.91321	2.29233	3.4344	51.4285	18.9138	2.37473	4.10171	14.8304
MYO18A	12.0806	14.7935	13.3092	27.379	30.8889	28.6208	18.2987	24.8002	13.118
NET1	29.2925	36.411	36.432	49.9614	72.44	48.1731	29.9022	32.2187	22.5453
PRSS8	5.7049	7.15071	4.50638	30.7868	30.5136	35.9326	3.14893	3.67388	34.2511
SAMD9	14.764	24.4405	14.4712	20.0611	238.875	176.822	16.9775	14.6715	41.9765
KRT6B	7.39937	11.0655	2.63525	21.2628	94.792	3.95481	2.5699	12.2632	4.22857
CPT1C	1.12182	1.1208	0.980455	5.19992	1.11369	3.02791	1.25871	0.981253	1.54749
GPR87	19.5492	12.8519	46.5591	47.0391	100.92	49.918	7.47759	48.5742	34.5574
CTSH	5.38741	2.33825	9.60207	19.5347	9.57023	44.7237	1.64772	7.28638	9.9872
PTK6	4.70879	5.79912	15.8639	15.5621	21.9196	28.4136	4.35996	3.95247	16.432
CEACAM1	1.04052	1.15911	1.29644	1.49788	5.55129	8.33661	1.19391	1.48666	1.33082
IL15RA	3.12794	3.0252	6.76883	6.94094	10.3693	10.9071	6.44059	2.68573	3.27726
MUC20	1.50059	1.01712	1.12346	1.08823	4.88054	8.30654	1.20244	1.10611	2.00397
SCNN1G	3.29789	0.92281	1.73531	4.64911	2.47521	7.58982	1.73531	1.97812	2.68977
CASTOR3	2.52843	1.55721	2.1459	4.82052	4.70888	7.4417	2.07529	2.88231	5.44862
NCOA7	6.33479	7.40804	15.5355	20.5034	26.5066	19.366	9.67932	11.8499	11.5168
SEMA3B	2.57709	2.95527	11.3093	8.25513	24.5681	16.9076	3.70322	2.45588	2.73061
TINAGL1	26.031	26.7425	65.3278	48.207	158.192	89.8415	20.8151	92.319	12.9846
PSCA	5.93869	1.35466	3.70128	3.11875	11.2718	48.0645	3.31859	1.88884	2.01076
B4GALT5	24.8287	22.7994	34.1121	70.6493	75.3882	67.1869	23.4474	57.9521	48.7133
OR2A7	1.47277	2.068	3.05484	7.46762	4.71112	4.1597	1.57973	2.92067	2.54767
CYP4F11	6.95485	1.17533	2.06395	26.7139	12.3632	3.50606	7.89342	2.40082	5.06806
RPS4Y1	1.29556	13.8964	0.770452	96.2031	1.27829	23.2071	0.770452	18.6877	0.966009
PARP9	4.68191	10.3445	12.2757	16.4264	45.9699	25.4249	7.51344	6.97016	22.2408
CXCL16	9.17637	6.93015	16.858	12.8063	47.4746	27.3047	3.45405	15.5946	17.078
ESPN	3.41566	1.28413	5.23642	4.34799	10.4143	7.82153	1.63929	5.056	3.04882
SDCBP2	1.18465	2.10747	1.71674	4.53929	8.18227	9.35664	2.07774	2.42104	1.91813
PLAUR	3.10549	4.59348	2.62571	3.87887	20.1601	13.7929	8.96191	4.50839	1.99218
DHRS3	9.2384	5.46655	35.1855	55.2228	38.1527	41.1995	4.01535	56.8702	7.56803
SPAG4	2.06136	2.41262	2.6132	4.34447	5.58296	6.18648	2.63518	2.87062	4.30876
THEMIS2	2.09458	2.6085	1.71549	8.9723	18.6013	5.23594	4.50329	1.52393	1.97842
GJB4	1.4416	1.0553	1.44904	2.14514	4.84312	5.355	1.38388	1.72705	1.64153
CTSF	2.0305	1.58313	6.65069	15.7445	5.32084	6.25407	3.93361	1.4105	3.0412
KRT6A	892.805	198.524	58.6732	616.845	3987.11	452.541	16.4229	776.495	715.669
GCNT1	10.3835	5.93171	1.83505	39.539	9.25791	12.1751	12.7957	3.83548	3.52965
SERPINA5	0.970319	1.06471	1.47108	2.92884	6.87632	1.53022	1.26343	1.37319	1.26343
TMC7	2.12068	2.08769	1.70725	4.84576	5.42088	4.30842	3.30633	3.82087	1.94764
TXNIP	25.5194	18.9181	114.458	124.063	156.306	89.3817	23.1088	3.44278	101.152
STAT1	23.0886	58.4836	39.3165	44.8644	237.416	105.263	49.2776	28.8012	77.5141
RAP2B	14.7229	7.48222	10.8064	30.4344	30.4966	15.9089	12.9153	13.9575	9.33372
FAM131A	2.90767	2.88655	2.95197	5.71135	6.11852	4.11547	1.7222	1.5655	3.35404
DISP3	1.04059	1.04251	1.60365	6.92659	2.47333	1.65738	1.55738	1.63782	1.62642
TMEM154	2.21884	3.03415	3.00767	4.27292	8.55198	5.6998	2.68135	5.24469	2.14581
FGFBP1	49.8903	38.3504	10.2164	158.078	60.9277	109.197	6.04765	106.136	51.0296
DYRK1B	2.10274	1.63652	1.53625	2.62699	3.12484	3.03978	1.47136	1.64181	1.47199
MMP9	1.71112	1.01286	1.45538	2.70908	20.5597	1.70845	1.56071	2.57631	1.51677
RNF213	8.74215	15.5906	10.7706	28.9578	75.4198	32.2472	36.9386	11.9547	14.4696
SLC39A6	27.8367	19.1395	39.8674	44.9195	58.6313	62.3572	22.3094	18.2568	17.9824
CD14	1.54304	1.40566	5.4118	6.46198	8.52539	3.81489	2.50791	1.79098	2.35238
FSTL1	48.3112	33.7247	10.2781	2.74091	10.8613	12.8866	94.9505	15.0502	21.2211
LINC01963	4.69165	4.37719	3.07659	1.3814	1.81073	1.57107	1.64544	4.86145	2.50522
CERK	17.4336	17.2425	10.6745	6.26966	4.64894	5.93407	13.3691	16.756	6.7615
B3GALNT1	6.31892	10.1709	5.21537	2.4071	3.00649	3.4638	10.4194	3.08467	6.55551
BASP1	56.5159	62.2656	51.3125	30.5616	23.2718	21.1168	94.1784	38.3986	28.5053
GLT8D2	2.6919	4.13137	1.377	1.06749	1.35351	1.14158	1.39137	3.58885	3.67851
FBN2	40.1731	25.0998	0.829431	1.20589	1.20753	1.62611	5.96885	12.6442	1.17924
CACHD1	4.1321	3.18246	5.38515	1.13676	2.00092	2.50151	1.82654	4.7646	6.22479
NECTIN3	7.1309	3.65651	0.947955	1.13148	1.17587	1.00533	6.6836	2.69724	1.97502
PSAT1	41.5215	44.3522	71.1614	18.6062	14.0203	29.6345	35.4637	71.4691	48.64
MRPL48	4.00167	7.7269	6.61675	3.5774	3.24002	2.79866	4.16552	7.86088	8.65794
TSEN15	22.9055	23.063	13.7995	8.60752	7.14535	13.5004	18.1055	14.8279	20.1839
ATP5PB	39.7847	39.5633	26.4919	19.5069	19.0413	11.9262	19.4564	43.674	39.6259
MFAP5	6.29649	8.28358	1.39017	1.29857	1.04973	1.43061	1.39565	2.59772	4.67559
CACNG4	14.9099	1.43185	9.52798	2.79492	1.60122	1.61375	10.9451	10.0885	7.68845
ALDH1L2	5.15461	9.53592	6.37087	10.0867	1.13257	1.07697	7.73566	4.85968	7.81951
POLD2	50.118	56.677	36.9986	27.846	22.1701	28.0366	45.284	39.7267	45.0189
LANCL2	7.54462	10.2023	5.55414	2.66282	4.1293	2.82734	4.13165	19.5511	5.10971
NUAK1	15.3804	10.3044	6.53605	4.57049	3.54419	3.52948	7.2716	6.54037	8.55705
ARHGAP42	15.0579	9.18412	1.55819	1.08703	1.40544	1.57116	6.84886	1.87162	2.39159
MAP1B	6.29695	6.8253	1.82604	0.970917	0.960044	1.49444	21.4334	2.07026	1.79724
EVA1A	6.94247	8.31705	7.74504	2.33615	1.77582	4.19916	7.64431	5.98591	2.60426
MPP1	4.12394	4.12855	3.28339	1.39855	1.94434	2.64033	6.07734	2.66413	4.03185
PHGDH	5.92006	11.6973	14.6551	1.86363	1.97715	3.75397	3.26448	27.8905	30.4437
OLR1	12.9055	6.73989	35.6857	2.91232	1.39315	2.21686	1.75444	33.0596	12.1002
CRIM1	48.7137	55.6021	95.4541	25.1804	15.2163	32.368	57.7013	27.1566	59.4859
STC2	11.243	20.3362	17.9773	6.76209	9.04952	3.99577	25.7925	16.4765	9.32563
TOP2B	27.3235	23.7267	22.0026	11.0618	16.1593	13.0275	29.5599	18.8738	23.8884
ANKRD1	11.9699	11.1356	4.43114	1.51263	1.08401	2.52329	1.58214	2.0272	26.5032
LRIG1	3.24187	3.84794	2.24216	1.33191	1.90086	1.1708	5.65429	4.99893	2.95559
NUDT15	45.0432	34.9585	22.6061	14.6485	9.75617	13.0819	21.5793	33.8595	13.5863
DLX1	3.3353	2.43403	2.44961	1.58471	1.82196	1.29427	2.94416	3.56908	3.33767
DTWD2	4.47933	3.35795	3.035	1.46788	1.9123	2.20844	4.12845	3.02821	2.96469
PBK	31.1803	19.5518	12.4613	12.4556	5.45637	3.39559	24.6131	18.3838	9.12993
ATL3	35.4137	27.8664	25.2896	12.1981	9.7676	15.4804	31.782	18.6563	15.9257
DPYSL3	7.0252	1.92784	1.3634	1.26633	1.07472	1.11945	20.5337	4.25625	1.28488
PDGFC	4.82091	6.77759	6.62956	4.68971	4.5352	2.41073	9.37963	8.2103	8.02246
TRIM58	6.84902	22.1901	1.12954	1.04679	1.06057	1.0738	32.6534	1.52948	1.06398
ADAMTS12	11.3603	6.2687	1.65461	0.996416	0.964866	1.20832	11.1147	1.2178	1.77015
PSPH	12.1408	14.9552	14.2725	8.32451	7.81052	7.78586	14.1875	47.4107	17.3035
MMP2	3.2029	4.49218	2.79494	8.98083	1.92563	4.82826	65.3354	14.9952	4.60478
BBOX1	1.09608	1.09608	1.02789	1.38377	1.20508	1.051	1.32764	2.07691	6.43948
SH3RF2	5.07436	4.72479	3.89635	5.99107	8.15687	4.09471	6.37369	21.3762	13.2429
COL3A1	1.61862	1.16908	0.858914	1.47124	1.15392	1.09297	15.7549	1.34221	5.78064
GPC4	1.32198	1.42959	0.863523	1.14966	1.18885	0.887461	2.16179	5.2086	4.12775
EPB41L4A	1.22593	1.04452	1.08293	1.02728	1.08192	1.16601	1.81032	1.55639	5.81004
BMF	1.54947	1.5428	1.92575	2.53736	2.49832	2.60888	3.25721	2.33275	19.3506
HMGN5	1.2872	1.56181	1.13616	1.85143	1.28017	1.08079	4.86571	2.7472	1.6387
EDIL3	2.61735	1.31782	0.758301	1.31782	1.35024	2.156	19.0337	4.29629	4.49328
SESN3	1.34802	1.50439	0.87174	1.75691	1.33458	1.03496	1.86698	7.52453	9.2029
GJA1	32.6148	1.76885	0.925172	27.978	4.10404	1.34272	18.2745	17.0568	66.1747
GPNMB	2.96397	1.50975	3.11771	2.48714	1.74932	5.9333	16.6186	72.1792	4.123
HS3ST3B1	1.42881	1.33929	1.04158	1.11395	1.38951	1.04377	5.70597	3.58819	1.10151
ADM2	1.17721	1.50263	1.30514	1.21659	1.64405	1.4825	2.65657	3.00438	2.69586
COL1A1	25.8296	6.70902	1.46475	11.4638	3.70802	4.14057	158.015	6.91721	22.1372
SLC1A4	3.19123	3.10817	4.70422	5.16005	3.56247	4.00448	8.80093	13.7638	4.54256
HSPB3	1.05928	1.0253	0.987354	1.4154	1.0253	1.03275	1.85139	2.41053	3.85962
SLC2A3	1.39412	1.45223	1.25784	1.36783	1.3072	0.808947	7.33917	1.92055	2.95647
G6PD	30.8886	18.6554	9.77692	28.4123	11.8733	30.088	196.82	33.1715	25.3427
SCARA3	9.1008	3.49761	3.47465	6.94244	4.71048	3.69493	12.6172	11.3767	8.42491
CFH	1.48279	1.25816	0.970383	1.25597	1.21003	1.83563	2.60866	4.043	1.62607
NDUFA1	23.3354	18.5889	13.926	17.1873	12.8104	34.5981	43.1006	47.152	36.7303
ADGRL2	9.38674	2.50493	1.24876	1.25147	2.97877	0.91116	9.70999	2.36812	11.7363
NUPR1	1.09321	1.07973	1.91505	1.62009	1.19916	1.12264	3.81845	2.38505	2.2746
HRAT92	1.20824	1.2938	1.57973	1.33718	1.35737	1.37624	4.02487	1.77081	2.43018
PLA2R1	3.0429	2.50067	1.32013	2.84155	2.27356	3.26759	5.72169	4.35417	8.38091
AKR1C2	1.21502	1.17786	0.914638	5.79118	1.20362	1.11234	15.3644	6.92842	1.01133
COL16A1	7.75518	6.53713	9.16622	15.8451	5.40019	5.78143	32.1642	21.9147	17.6893
C1orf21	3.00118	1.32079	1.12162	1.98573	1.0468	1.54284	2.5469	3.11666	5.37164
HEY1	1.76631	1.86695	1.22275	1.05501	1.4304	1.10371	2.90666	3.0277	3.80485
GOLGA8N	1.27692	1.83547	1.35038	1.51879	1.49324	1.64442	3.2295	1.95365	3.20826
ZNF711	1.84373	1.12992	0.895514	1.17703	1.21555	0.940129	2.5845	1.39497	5.66042
MAFB	2.929	3.40277	1.31578	1.52868	2.14404	1.32116	4.67213	4.63747	8.31238
ZSCAN31	2.33314	1.22249	1.19376	4.7757	2.09177	1.53325	7.20599	3.22062	5.90319
SH3BGRL	3.20313	8.19369	3.82478	10.2644	4.99951	1.29405	35.3965	16.2241	15.4023
ANXA6	1.43396	1.18381	0.909056	1.19827	1.38737	1.16571	8.56457	4.8819	1.10523
RDX	27.29	16.0693	17.4683	17.7003	20.8197	25.1682	36.9438	30.0553	47.1947
PLGRKT	3.49305	8.91228	4.12851	4.15163	4.81688	6.01583	11.7382	11.8489	11.0816
WNT6	2.10484	1.10007	2.19985	1.712	1.67673	1.15256	3.29636	4.25241	2.43105
NREP	1.49029	3.10825	1.28362	3.94314	1.7125	1.19636	9.4769	2.16696	5.51435
FABP4	1.39393	1.17272	0.813489	1.35409	1.15007	0.883546	0.812102	5.10507	12.5831
WNT5A	2.11339	1.70889	0.957591	1.33118	1.0857	1.00392	27.3481	1.29268	4.77698
COX7B	6.90053	7.38975	5.99044	9.12975	6.8178	13.4719	19.9024	21.941	12.4772
RGCC	1.52734	1.65143	2.32085	1.65486	2.83544	1.53273	6.31046	2.84477	6.9772
TPM1	7.75859	10.5253	9.69329	17.9604	4.75133	7.1332	20.8799	17.4798	30.3858
BCL11A	1.15781	1.23217	1.16136	1.33462	1.00512	1.05385	1.66257	1.87687	3.86443
SYT7	2.08774	1.5609	5.50342	6.24615	3.67734	3.97704	4.82579	8.44015	21.1403
AKR1C3	1.62767	1.26262	0.818634	1.89128	1.61385	1.53871	39.3116	3.37859	1.97395
SUMF2	23.2163	44.155	21.3507	30.2981	26.5619	31.1524	36.4721	156.481	47.3164
SNCA	3.22777	1.1166	1.39227	2.21372	1.24008	1.72676	2.85841	6.53869	3.27151
JDP2	4.88832	3.28907	3.40163	3.75823	1.33104	3.2	5.15121	6.82161	11.258
NDUFB6	10.4003	14.0674	9.20415	10.8817	8.20259	9.93536	19.371	17.146	19.5867
SCARF2	1.32222	1.26604	1.25317	1.22073	1.1757	0.936058	5.26725	2.72527	1.45173
SPTLC3	1.69923	3.23896	2.25357	1.41479	2.27362	1.76679	6.36262	3.46083	3.64553
MLLT3	1.58317	1.96415	1.48787	2.09273	1.84523	1.49653	3.06222	3.40182	3.52869
CYBRD1	8.7688	7.69156	13.6267	8.50481	6.83154	4.70596	34.4101	11.527	22.0776
SLITRK6	1.67635	1.67088	1.02021	1.54218	1.12966	1.2965	1.12592	10.4848	4.75916
COL1A2	4.24234	1.08863	0.918641	1.16105	1.12401	1.14851	20.5392	1.8511	10.5854
MMP1	2.7652	2.56729	0.966435	1.4618	9.80206	1.90896	0.951605	65.0443	54.6624
IGFBP5	1.24254	1.21038	0.833879	1.24177	1.21038	0.954633	1.73903	1.34972	12.8204
SOX2	1.54939	1.47979	0.749635	1.47979	1.47979	0.882913	1.89981	4.2003	10.4835
SMARCA1	5.66149	12.9048	2.451	30.9069	2.85604	8.76912	37.9858	23.5265	16.5935
PLXND1	2.46192	1.92388	1.88457	2.08516	1.37858	3.20051	7.10267	4.34584	5.36332
ABCA13	1.16318	1.18228	1.05553	1.13404	1.11025	1.18963	1.09064	4.22492	3.5525
PLCXD1	5.88219	3.17343	6.91348	6.94172	3.5725	4.7464	1.9926	1.83889	3.6547
SNORD83A	6.43436	12.0326	16.4265	12.9242	11.9342	9.28891	7.67684	5.03026	3.68389
ANKRD13B	9.10968	5.91108	9.47872	11.1452	10.0391	6.98175	4.11251	5.52723	4.25946
ZNF114	27.4044	2.89358	7.22436	3.5995	18.4955	4.82068	2.30489	2.40733	3.26161
MET	97.5913	52.5532	162.242	128.8	76.4823	62.502	44.8866	45.8244	30.982
INPP4B	12.1369	9.22712	7.83148	8.79472	13.3909	13.5544	5.53855	5.46555	3.19472
PLK3	7.02682	5.21511	13.5857	11.2403	11.5326	4.07386	3.94972	4.27509	2.48896
DUSP5	5.93409	13.0971	39.69	19.9769	12.8822	11.5403	6.63571	8.90184	2.59721
TNS4	89.5506	155.431	51.8489	336.84	75.3011	62.439	9.6629	74.6106	54.9914
PKMYT1	17.8249	12.8121	12.9459	11.7123	6.92876	14.891	6.25574	5.23269	4.38188
SLC29A1	18.5291	21.874	17.0777	36.2648	26.1972	23.746	13.6342	14.3936	6.55174
DKK1	66.7099	35.355	97.1864	141.954	82.1091	76.3603	2.34137	45.7134	17.2615
CYSRT1	4.19418	2.49575	5.61659	2.18964	6.64839	8.69175	1.38813	1.44966	2.65148
ARL10	5.67146	4.28457	6.50343	6.76635	3.93123	3.54245	1.53463	1.52274	2.87898
PROSER2	15.8435	27.3249	44.4252	37.2555	21.2906	16.621	10.6828	15.3096	6.45005
SOWAHC	16.2656	20.4886	28.9054	37.1547	22.2911	17.3299	14.1349	8.07872	11.8666
ETV4	11.8278	11.8102	7.6862	8.90834	3.97681	7.20414	5.67946	3.83804	1.80457
ECHDC3	4.37167	3.03653	9.2958	11.4955	2.99184	4.29416	2.97789	1.28393	1.34878
F3	304.778	284.6	408.631	201.007	239.315	185.7	85.9442	220.049	90.6397
KCNK5	2.67835	4.09655	7.49003	5.13319	4.0382	7.5635	1.54021	1.55715	3.75933
CBLC	5.77562	13.7354	22.9714	27.0143	13.8493	21.9513	1.30362	8.15457	12.9019
SCARB1	31.9191	7.92411	15.6864	15.1859	28.7011	22.9094	7.47719	7.78495	6.9485
AREG	41.6157	171.802	46.759	191.076	25.121	76.0126	4.37189	46.9152	9.47152
SHANK3	5.88083	6.36827	4.1224	8.32658	4.16149	3.79016	3.78759	1.69646	2.55165
HMGA1	265.176	294.573	579.144	299.142	249.144	132.059	204.485	105.967	74.8198
NAGS	3.53784	4.58094	5.72622	5.97058	3.60461	3.60573	1.80191	1.6714	2.16815
CLCF1	9.67176	10.4619	16.0196	21.9688	10.8841	9.70377	5.25068	5.00745	6.20587
EVPL	17.603	13.5436	12.7249	12.6855	22.279	20.5584	3.05248	6.30505	14.3375
CMTM7	2.6287	1.08973	7.89907	10.8863	2.4181	2.64327	1.01669	1.12613	1.03314
AJAP1	2.31609	5.2918	4.30008	3.72299	3.13313	1.44526	1.37403	1.37403	1.37403
BIRC3	197.924	75.8106	5.73138	23.7211	28.6461	30.3893	9.49946	9.05168	11.3741
CDIP1	7.88584	5.27319	7.4383	8.11207	3.35609	5.79761	3.62614	2.38206	2.29724

## Sheet: Figure 6 - figure supplement 2A
Figure 6 - figure supplement 2A
YAP1-dependent	WWTR1-dependent	Compensable
0.251457	0.457038	0.223027
0.487918	0.596873	0.220788
0.385016	0.60985	0.27459
0.255906	0.30496	0.301182
0.298084	0.530957	0.590757
0.333739	0.562355	0.258596
0.233689	0.312037	0.24134
0.542055	0.530862	0.406275
0.064743	0.630992	N/A
0.339646	0.546433	0.291724
0.353664	0.316721	0.327049
0.296196	0.449747	0.312345
0.532256	0.392422	0.520915
0.430835	0.482807	0.401997
0.355271	0.444421	0.536511
0.453374	0.212473	0.368236
0.213758	0.476838	0.403618
0.50792	0.696748	0.430833
0.250378	0.602914	0.432983
0.248226	0.430654	0.381003
0.618213	0.638471	0.249517
0.279615	0.355566	0.481919
0.173853	0.264585	0.380807
0.451387	0.322712	0.585598
0.349938	0.394985	0.199489
0.395984	0.485794	0.347365
0.529819	0.287481	0.442978
0.335883	0.63858	N/A
0.680295	0.498851	0.322925
0.467887	0.336354	0.292505
0.278673		0.636878
0.678654		0.428274
0.282773		0.21504
0.423117		0.462174
0.318629
0.373873
0.294061
0.46519
0.204879
0.432169
0.271378

## Sheet: Figure 6 - figure supplement 2B
Figure 6 - figure supplement 2B
T Cells CD4 Memory Activated			T Cells CD4 Memory Resting			T Cells CD4 Naive			T Cells CD8			T Cells Follicular Helper			T Cells Regulatory Tregs
YAP1-dependent	WWTR1-dependent	Compensable	YAP1-dependent	WWTR1-dependent	Compensable	YAP1-dependent	WWTR1-dependent	Compensable	YAP1-dependent	WWTR1-dependent	Compensable	YAP1-dependent	WWTR1-dependent	Compensable	YAP1-dependent	WWTR1-dependent	Compensable
0.000265	0.021619	0.005411	0.153787	0.137943	0.037966	0.007582	0	0	0.030503	0.131193	0.072147	0	0.047734	0.080564	0	0.049134	0
0	0.014824	0	0.296387	0.038715	0.160361	0	0	0	0.06008	0.24636	0.041365	0.023418	0.076883	0.006544	0	0.057287	0
0	0.039723	0	0.169323	0	0.083098	0	0	0	0.127993	0.187168	0.052796	0.012582	0.070195	0.042655	0	0.024988	0.039538
0	0.031275	0	0	0	0.078558	0.029515	0	0	0.030751	0.148677	0.071347	0.107848	0.068142	0.050527	0	0.003044	0.021649
0	0.04594	0	0.13568	0.09194	0.184225	0	0	0	0.074743	0.153506	0.055833	0.006152	0.099625	0.146845	0.005303	0.016734	0.031745
0.01585	0.01919	0	0.060853	0.12636	0.030759	0	0	0	0.036771	0.189008	0.018536	0.140609	0.085048	0.068111	0	0.04298	0.079848
0	0	0	0.13419	0.155852	0.046045	0	0	0	0.023987	0.088389	0.064363	0.008934	0.008006	0.036859	0	0	0.023363
0	0.020579	0	0.068225	0.042829	0.09043	0	0	0	0.194587	0.098566	0.063784	0.126071	0.071987	0.100374	0.054385	0	0.019631
0	0.025727		0.029674	0		0	0		0	0.294719		0.007792	0.125401		0.003115	0.077259
0	0.004492	0	0.159297	0.058326	0.179724	0	0	0	0.02404	0.068317	0.031827	0.029773	0.081259	0.001753	0	0.018888	0.032436
0	0	0	0.01267	0.086772	0.031552	0	0	0	0.04567	0.039197	0.011065	0.121779	0.030076	0.050692	0.017936	0.113494	0.01993
0.005822	0	0	0.091358	0.129934	0.062751	0	0	0	0.06008	0.124727	0.062286	0.026796	0.065788	0.049447	0	0.048347	0.044311
0	0.002978	0.021578	0.188433	0.037123	0.235552	0	0	0	0.090748	0.139408	0.090902	0.05574	0.060303	0.063784	0.027578	0.017041	0.002045
0.096822	0.044472	0	0.011412	0.119694	0.160968	0	0	0	0.142663	0.174464	0.097516	0.043826	0.07145	0.072109	0.038706	0.006191	0.031105
0	0	0	0.164905	0	0.227574	0	0	0	0.049928	0.238544	0.112176	0	0.183078	0.038979	0	0.004916	0.006346
0.028193	0	0	0.157391	0	0.119685	0	0.000529	0	0.05017	0.022841	0.079895	0.078663	0.034117	0.035391	0.010867	0.020991	0.064745
0	0.004354	0	0.125275	0	0.125055	0.057902	0	0	0	0.240621	0.072575	0	0.164835	0.062297	0	0.022203	0.048702
0.060448	0.075795	0	0	0	0.161138	0	0	0	0.108944	0.329063	0.145172	0.218282	0.122068	0.043591	0	0.041606	0.028608
0.003329	0.04471	0.026603	0.06996	0	0.09301	0	0	0	0.10248	0.348827	0.085479	0.036927	0.112899	0.142219	0.003962	0.028747	0.003514
0	0.016505	0	0.065542	0	0.143981	0.071333	0	0	0.04146	0.159599	0.029555	0	0.089901	0.035622	0	0.02625	0.072495
0.012244	0.105095	0	0.107467	0	0.069898	0	0	0	0.123051	0.30739	0.045496	0.130595	0.094034	0.045743	0	0.048539	0.039437
0	0	0	0.184799	0	0.105937	0	0	0	0.017161	0.112158	0.07567	0	0.141956	0.078057	0.018476	0.002115	0.034124
0.004614	0	0	0.085763	0	0.072015	0	0	0	0.029117	0.085178	0.06283	0.015727	0.121708	0.05229	0.010337	0.001467	0.05232
0	0	0	0.1485	0.00429	0.201937	0	0	0	0.219569	0.074033	0.045727	0.011302	0.126845	0.042364	0.011524	0.035388	0.09017
0.123612	0.116944	0	0	0	0.15232	0	0	0	0.055905	0.134068	0.003823	0.012115	0	0	0.025879	0	0
0.051913	0	0.007373	0.024621	0.033328	0.10033	0	0	0	0.058966	0.057167	0.036198	0.058506	0.070036	0.01364	0.011861	0.198012	0.021499
0	0.049929	0.014671	0.189029	0	0	0	0	0	0.067187	0.133023	0.156189	0.099602	0.0667	0.083808	0.041592	0.004158	0.071344
0.058967	0.100293		0.080819	0		0	0		0.017763	0.403562		0.039516	0.064052		0	0.013242
0.016544	0	0.02242	0.161749	0.092515	0.188905	0	0	0	0.109807	0.091831	0.042923	0.028284	0.110632	0.006256	0.083714	0.012275	0
0	0.021753	0	0.301864	0	0	0	0.017326	0	0.051522	0.091139	0.069846	0	0.014957	0.127811	0	0.01561	0.028745
0.008088		0.004109	0.133421		0	0.088483		0	0.025524		0.334585	0		0.168019	0		0.002426
0.121928		0.002845	0		0.125696	0		0	0.348657		0.096135	0.033374		0.094198	0		0.033336
0.013797		0	0.045805		0.109487	0		0.042593	0.113733		0.007037	0.064277		0	0		0
0.00429		0	0.166062		0.008171	0		0	0.073023		0.128598	0.077502		0.138506	0.029164		0.096661
0			0.001989			0			0.117971			0.07063			0
0			0.201005			0.045212			0			0			0
0.014792			0.116759			0.025994			0.057837			0			0
0			0.037013			0			0.165512			0.136764			0.002549
0			0			0			0.021822			0.109057			0
0			0			0			0.127267			0.120715			0.018762
0			0.068849			0			0.034539			0.053323			0

## Sheet: Figure 6 - figure supplement 2C
Figure 6 - figure supplement 2C
YAP1-dependent	WWTR1-dependent	Compensable
4.6	14.9	N/A
4	4.6	2.7
2.3	2	4.5
2.7	8.6	5
2	6.1	4.8
5.4	6.9	3.8
3.4	2.2	4.4
2.5	2.7	3.5
6.2	3	3.7
3	1.9	2.1
3.1	1.9	3.6
1.5	4	4.2
6.2	8.6	1.9
3.2	12.9	5.4
4	4.8	1.2
2.7	3	2.5
3.7	2.4	0.9
7.6	3.3	3
3.6	6.2	3.9
3.5	3.5	1.4
1.5	9.8	2.3
3	11.1	7.8
4.3	4.2	3.5
1.7	1.7	7.8
4.8	5.2	2.2
4.8	2.5	2.6
7	5.4	1.7
3.3	6	2.9
0.5	4.1	1.2
2.8	2.1	1.7
3.2		1.1
106*		3.7
2.9		5.9
N/A		1.3
4.5
2.5
1.6
3.7
15.4
4.9
3.7

[truncated: 2 more sheets: Figure 6 -figure supplement 3A, Figure 6 -figure supplement 3B]
