# Supplementary material for: Genome-wide CRISPR screens of oral squamous cell carcinoma reveal fitness genes in the Hippo pathway
Source: eLife journal article supplement (doi:10.7554/elife.57761), 2020-09-29

A

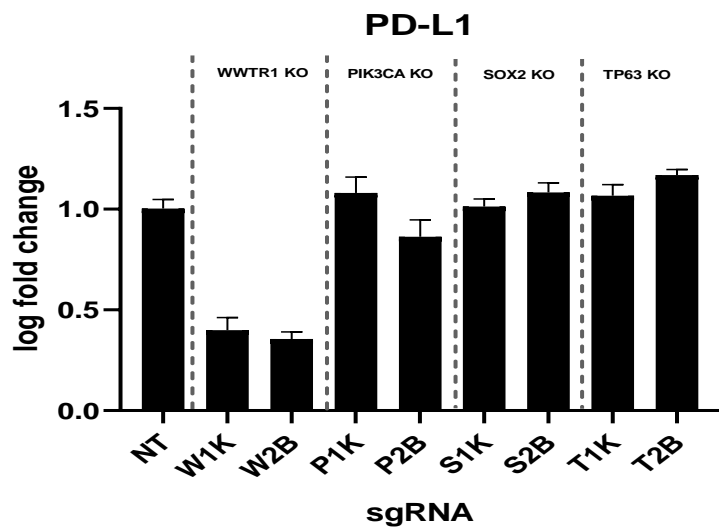

**Legends:**

NT – Non targeting  
W1K/W2B – sgRNAs targeting WWTR1  
P1K/P2B - sgRNAs targeting PIK3CA  
S1K/S2B - sgRNAs targeting SOX2  
T1K/T2B - sgRNAs targeting TP63

B

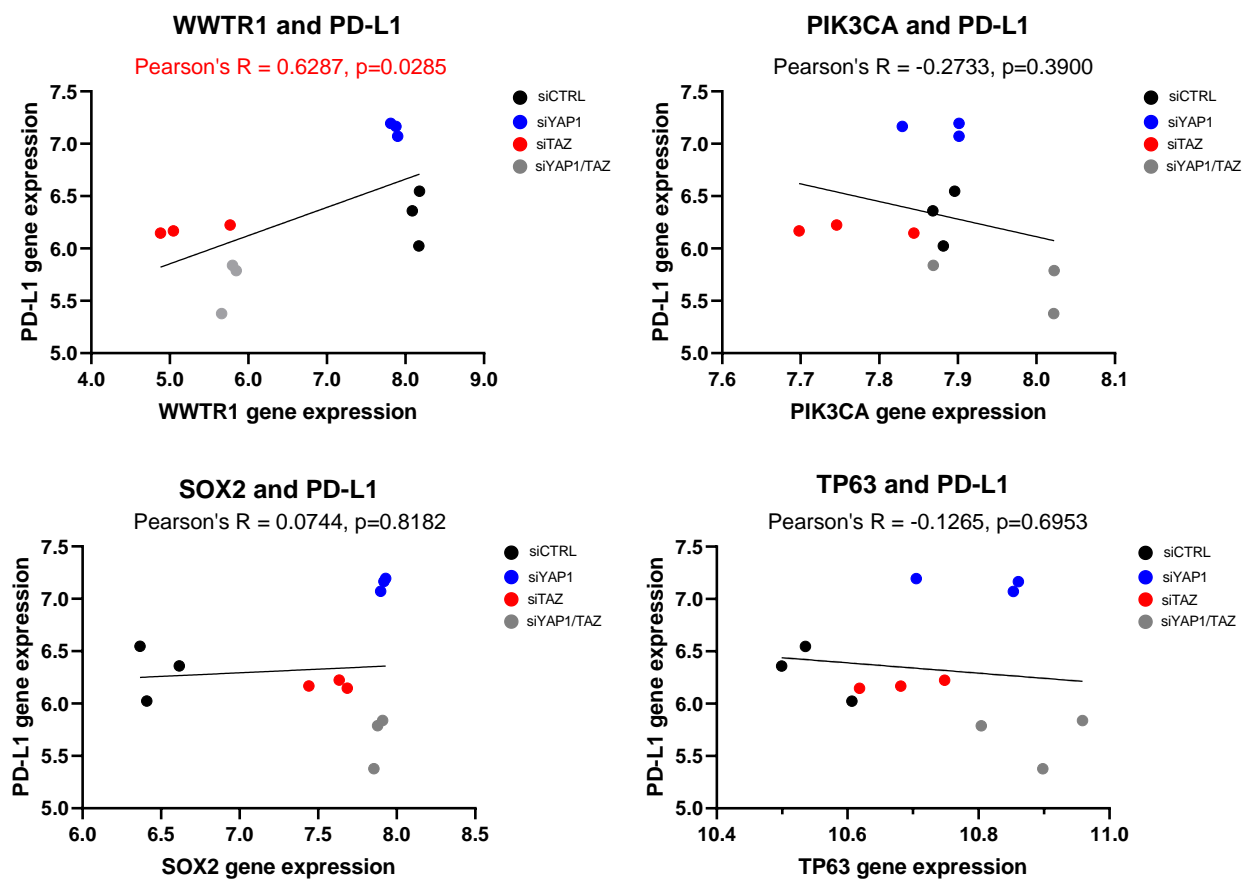

Supplement: supp [file elife-57761-supp-v1.zip]
