# Supplementary material for: Genome-wide CRISPR screens of oral squamous cell carcinoma reveal fitness genes in the Hippo pathway
Source: eLife journal article supplement (doi:10.7554/elife.57761), 2020-09-29

A

## Differential essentiality of YAP1/WWTR1 and correlation with gene expression

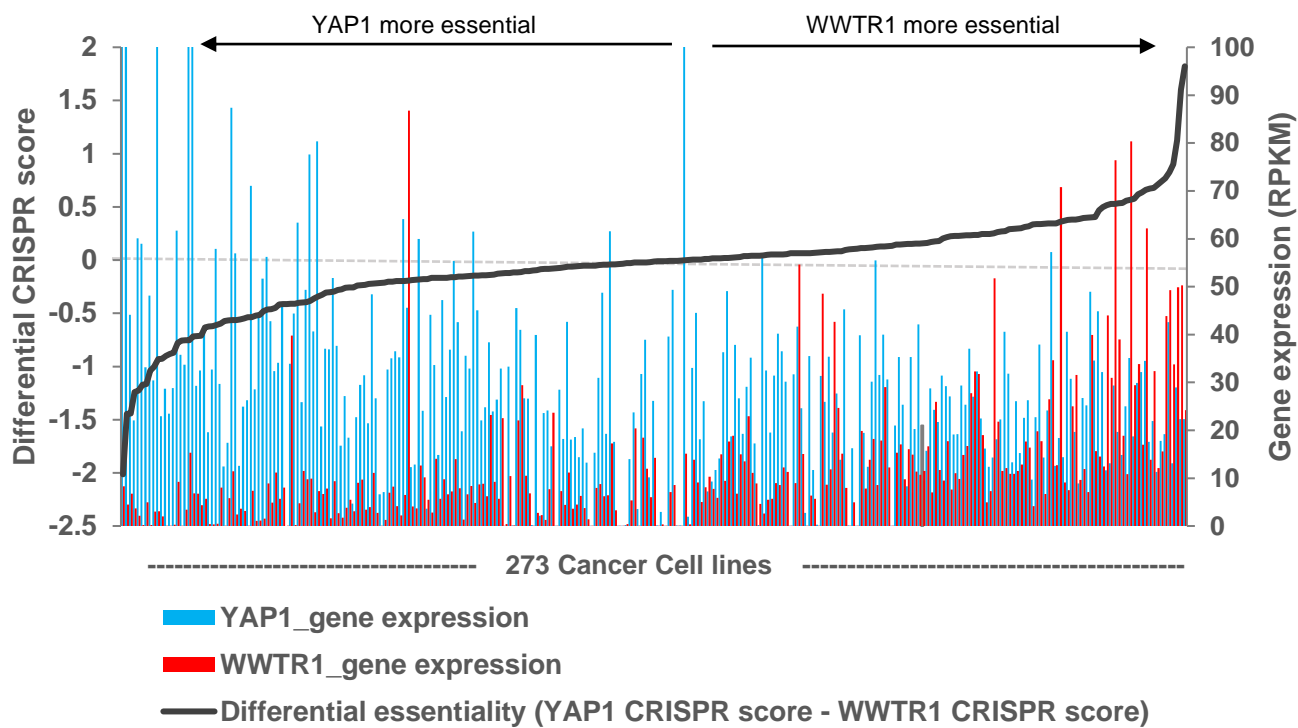

B

## Pan-cancer cell lines (Project Score)

Pearson's R = -0.570, p-value = 3e-25

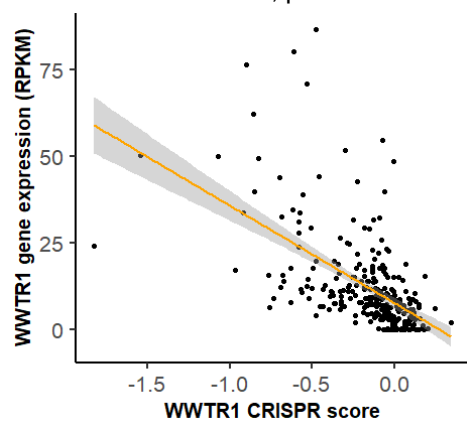

C

## 21 OSCC cell lines

Pearson's R = -0.354, p-value = 0.116

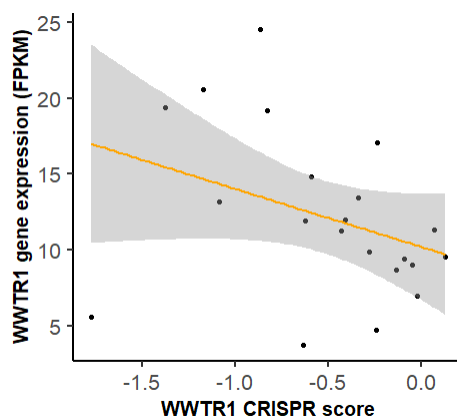

D

## Non-small cell lung carcinoma

Pearson's R = -0.934, p-value = 0.0021

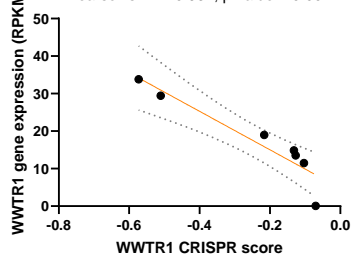

## Squamous cell lung carcinoma

Pearson's R = -0.793, p-value = 0.0036

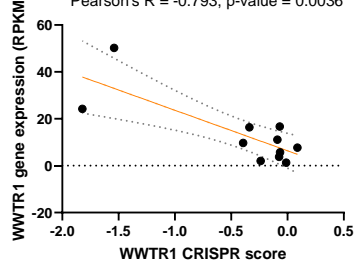

## Glioblastoma

Pearson's R = -0.708, p-value = 0.0002

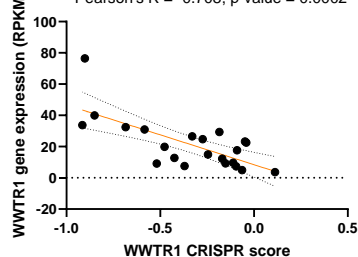

## Breast carcinoma

Pearson's R = -0.675, p-value = 0.0004

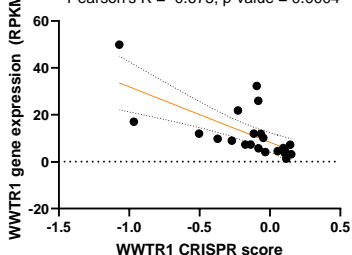

## Lung adenocarcinoma

Pearson's R = -0.586, p-value = 0.0084

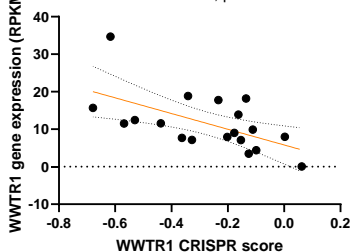

Supplement: supp [file elife-57761-supp-v1.zip]
