# Supplementary material for: Genome-wide CRISPR screens of oral squamous cell carcinoma reveal fitness genes in the Hippo pathway
Source: eLife. 2020 Sep 29;9:e57761. doi: 10.7554/eLife.57761 (PMC7591259; doi:10.7554/eLife.57761)
Supplement: Supplementary file 1. [file elife-57761-supp1.xlsx]

## Sheet: Supplementary file 1
Supplementary file 1 - Number of MAGeCK defined essential genes and percentage overlap with core fitness gene
Table showing the number of essential genes identified using MAGECK at FDR of 0.05 in each of the 21 OSCC cell lines (a) and proportion of non-expressing genes (b)/high expressing genes (a-b), common core fitness genes identified from other studies (c,d,e,f) [Please refer to Supplementary file 2 for gene list] and the final number of essential genes for each cell line considered for downstream an…
OSCC cell line	All MAGECK hits (FDR<0.05)	Gene expression ≤ 0.5 FPKM		Gene expression > 0.5 FPKM		No. of overlapping genes in CEG1 (n=360)			No. of overlapping genes in CEG2 (n=684)			No. of overlapping genes in PCEG (n=582)			No. of overlapping genes in DepMapEG (n=1825)			Total number of overlapping genes to be filtered out		Final number of essential genes for downstream analysis
	n	n	%	n	%	n	%	% of CEG1	n	%	% of CEG2	n	%	% of PCEG	n	%	% of DepMapEG	n	%
ORL-48	1140	14	0.012	1126	0.99	217	0.19	0.6	531	0.47	0.78	486	0.43	0.84	929	0.83	0.51	979	0.87	147
ORL-115	993	13	0.013	980	0.99	207	0.21	0.58	485	0.49	0.71	474	0.48	0.81	794	0.81	0.44	843	0.86	137
ORL-136	1109	21	0.019	1088	0.98	223	0.2	0.62	513	0.47	0.75	497	0.46	0.85	906	0.83	0.5	952	0.88	136
ORL-150	1192	26	0.022	1166	0.98	217	0.19	0.6	538	0.46	0.79	487	0.42	0.84	913	0.78	0.5	968	0.83	198
ORL-153	1082	18	0.017	1064	0.98	220	0.21	0.61	508	0.48	0.74	483	0.45	0.83	881	0.83	0.48	928	0.87	136
ORL-156	525	12	0.023	513	0.98	131	0.26	0.36	309	0.6	0.45	318	0.62	0.55	455	0.89	0.25	479	0.93	34
ORL-166	554	7	0.013	547	0.99	145	0.27	0.4	308	0.56	0.45	329	0.6	0.57	466	0.85	0.26	499	0.91	48
ORL-174	1234	20	0.016	1214	0.98	211	0.17	0.59	544	0.45	0.8	491	0.4	0.84	955	0.79	0.52	1005	0.83	209
ORL-188	1133	19	0.017	1114	0.98	222	0.2	0.62	529	0.47	0.77	498	0.45	0.86	900	0.81	0.49	949	0.85	165
ORL-195	1033	14	0.014	1019	0.99	214	0.21	0.59	501	0.49	0.73	501	0.49	0.86	837	0.82	0.46	885	0.87	134
ORL-204	779	17	0.022	762	0.98	172	0.23	0.48	410	0.54	0.6	413	0.54	0.71	638	0.84	0.35	674	0.88	88
ORL-207	1269	27	0.021	1242	0.98	227	0.18	0.63	553	0.45	0.81	505	0.41	0.87	995	0.8	0.55	1051	0.85	191
ORL-214	1131	15	0.013	1116	0.99	211	0.19	0.59	503	0.45	0.74	479	0.43	0.82	871	0.78	0.48	922	0.83	194
ORL-215	1399	18	0.013	1381	0.99	234	0.17	0.65	562	0.41	0.82	515	0.37	0.88	1049	0.76	0.57	1099	0.8	282
BICR10	1383	4	0.003	1379	1	243	0.18	0.68	574	0.42	0.84	521	0.38	0.9	1101	0.8	0.6	1159	0.84	220
Ho-1-u-1	1028	4	0.004	1024	1	199	0.19	0.55	502	0.49	0.73	475	0.46	0.82	840	0.82	0.46	885	0.86	139
HSC-2	1188	4	0.003	1184	1	227	0.19	0.63	564	0.48	0.82	514	0.43	0.88	968	0.82	0.53	1022	0.86	162
HSC-4	1361	6	0.004	1355	1	242	0.18	0.67	577	0.43	0.84	519	0.38	0.89	1069	0.79	0.59	1129	0.83	226
PE/CA-PJ15	1229	12	0.01	1217	0.99	233	0.19	0.65	558	0.46	0.82	508	0.42	0.87	991	0.81	0.54	1051	0.86	166
SAS	1321	4	0.003	1317	1	224	0.17	0.62	559	0.42	0.82	504	0.38	0.87	1014	0.77	0.56	1079	0.82	238
SCC-9	961	7	0.007	954	0.99	201	0.21	0.56	478	0.5	0.7	485	0.51	0.83	800	0.84	0.44	839	0.88	115
	(a)	(b)		(a-b)		( c )			(d)			( e )			( f )			(g)		[(a-b)-(g)]
