# Supplementary material for: Genome-wide CRISPR screens of oral squamous cell carcinoma reveal fitness genes in the Hippo pathway
Source: eLife. 2020 Sep 29;9:e57761. doi: 10.7554/eLife.57761 (PMC7591259; doi:10.7554/eLife.57761)
Supplement: Supplementary file 2. [file elife-57761-supp2.xlsx]

## Sheet: Supplementary file 2
Supplementary file 2 - List of core fitness genes from four different sources.
CEG1 (n= 360) - Hart et al. 2014	CEG2 (n= 684) - Hart et al. 2017	PCEG (n=582) - Behan et al. 2019	DepMapEG (n= 1825) - Meyers et al. 2017 (18Q3 release)	Combined unique core fitness gene
ACTL6A	AARS	AAMP	AAAS	AAAS
ACTR6	ABCE1	ABCB7	AAMP	AAMP
ALYREF	ABCF1	ABCE1	AARS	AARS
ANAPC4	ACTB	ACTR10	AARS2	AARS2
ANAPC5	ACTL6A	ACTR2	AATF	AATF
AP2S1	ACTR10	ALG11	ABCE1	ABCB7
AQR	ACTR2	ALG1L	ABCF1	ABCE1
ARCN1	ADSL	ALG2	ABHD11	ABCF1
ARL5B	ADSS	ALYREF	ABT1	ABHD11
ATP6V0D1	AHCY	ANAPC1	ACD	ABT1
ATXN7	ALG1	ANAPC10	ACIN1	ACD
BIRC6	ALG14	ANAPC2	ACOT12	ACIN1
BOP1	ALG2	ANAPC4	ACTB	ACOT12
BPTF	ANAPC2	ANKLE2	ACTL6A	ACTB
BRIX1	ANAPC4	AQR	ACTR10	ACTL6A
C11orf24	ANAPC5	ARCN1	ACTR1A	ACTR10
C12orf66	AQR	ARIH1	ACTR1B	ACTR1A
C14orf166	ARCN1	ARL2	ACTR2	ACTR1B
C19orf43	ARIH1	ATP2A2	ACTR6	ACTR2
CAP1	ARL2	ATP6V0C	ACTR8	ACTR6
CCNG1	ATP2A2	ATP6V0D1	ADAT2	ACTR8
CCNK	ATP5A1	ATP6V1A	ADRM1	ADAT2
CCT3	ATP5B	ATP6V1B2	ADSL	ADRM1
CCT4	ATP5C1	ATP6V1D	AFG3L2	ADSL
CCT5	ATP5D	ATP6V1E1	AGAP5	ADSS
CCT6A	ATP5J2-PTCD1	AURKB	AGAP6	AFG3L2
CCT7	ATP5L	BANF1	AHCTF1	AGAP5
CCT8	ATP5O	BCAS2	AHCY	AGAP6
CDC40	ATP6V0B	BCL2L2-PABPN1	AK6	AHCTF1
CDC5L	ATP6V0C	BIRC5	AKIRIN2	AHCY
CDK17	ATP6V1A	BRF1	ALDOA	AK6
CHD4	ATP6V1D	BRF2	ALG1	AKIRIN2
CHMP2A	ATP6V1E1	BUB3	ALG11	ALDOA
CLTC	ATR	C21orf59	ALG14	ALG1
COPA	AURKB	C9orf114	ALG1L	ALG11
COPB1	BANF1	CACTIN	ALG2	ALG14
COPB2	BIRC5	CARS	ALYREF	ALG1L
COPE	BUB1B	CBWD1	ANAPC1	ALG2
COPS2	BUB3	CCDC94	ANAPC11	ALYREF
COPS4	BUD31	CCNH	ANAPC13	ANAPC1
COPS6	BYSL	CCNK	ANAPC15	ANAPC10
COPS8	C10orf2	CCT2	ANAPC2	ANAPC11
COPZ1	C1orf109	CCT3	ANAPC4	ANAPC13
COX10	C21orf59	CCT5	ANAPC5	ANAPC15
CPSF2	C3orf17	CCT6A	ANKLE2	ANAPC2
CPSF3	C9orf114	CCT7	ANKRD11	ANAPC4
CSE1L	CCDC84	CCT8	ANKRD20A2	ANAPC5
CTDNEP1	CCDC94	CDC123	ANKRD36	ANKLE2
DARS	CCNA2	CDC16	ANLN	ANKRD11
DDB1	CCNH	CDC20	AP2M1	ANKRD20A2
DDX18	CCNK	CDC23	AP2S1	ANKRD36
DDX21	CCT2	CDC27	AQP7	ANLN
DDX46	CCT3	CDC37	AQR	AP2M1
DDX49	CCT4	CDC45	ARCN1	AP2S1
DDX51	CCT5	CDC5L	ARF4	AQP7
DDX54	CCT6A	CDC6	ARFRP1	AQR
DKC1	CCT7	CDC7	ARGFX	ARCN1
DLG5	CCT8	CDC73	ARGLU1	ARF4
DNAJC1	CDC123	CDK1	ARIH1	ARFRP1
DNM2	CDC16	CDK11A	ARL2	ARGFX
DNTTIP2	CDC20	CDK7	ARL4D	ARGLU1
DYNC1H1	CDC27	CDK9	ARMC6	ARIH1
DYNC1I2	CDC37	CDT1	ARMC7	ARL2
EEF2	CDC5L	CENPC	ARPC3	ARL4D
EFTUD2	CDC73	CENPE	ARPC4	ARL5B
EIF1AX	CDK1	CENPK	ASF1B	ARMC6
EIF2B2	CDK7	CENPM	ASNA1	ARMC7
EIF2B3	CDK9	CENPN	ASUN	ARPC3
EIF2B4	CDT1	CENPW	ATF4	ARPC4
EIF2S2	CEBPZ	CHAF1A	ATL2	ASF1B
EIF3A	CENPA	CHAF1B	ATP1A1	ASNA1
EIF3B	CENPC	CHEK1	ATP2A2	ASUN
EIF3C	CFL1	CHERP	ATP5B	ATF4
EIF3D	CHAF1A	CHMP2A	ATP5C1	ATL2
EIF3E	CHAF1B	CHMP6	ATP5D	ATP1A1
EIF3F	CHEK1	CKAP5	ATP5E	ATP2A2
EIF3G	CHERP	CLNS1A	ATP5I	ATP5A1
EIF3H	CHMP2A	CLP1	ATP5J2	ATP5B
EIF3I	CHMP6	COPA	ATP6V0B	ATP5C1
EIF4A3	CIAO1	COPB1	ATP6V0C	ATP5D
EIF4E	CINP	COPB2	ATP6V1A	ATP5E
EIF5B	CIRH1A	COPS2	ATP6V1B2	ATP5I
EIF6	CKAP5	COPS5	ATP6V1C1	ATP5J2
ERAP1	CLNS1A	COPS8	ATP6V1D	ATP5J2-PTCD1
ERH	CLP1	COPZ1	ATP6V1E1	ATP5L
ETF1	CLTC	CPSF2	ATP6V1F	ATP5O
EXOSC10	CMPK1	CPSF3	ATP6V1G1	ATP6V0B
FDPS	CMTR1	CPSF3L	ATP6V1H	ATP6V0C
FLAD1	CNOT3	CRNKL1	ATR	ATP6V0D1
FTSJ3	COA5	CSE1L	ATRIP	ATP6V1A
GABPA	COPA	CSTF3	AURKA	ATP6V1B2
GAPDH	COPB1	CTCF	AURKAIP1	ATP6V1C1
GAR1	COPB2	CTDP1	AURKB	ATP6V1D
GEMIN2	COPS3	CWC22	BANF1	ATP6V1E1
GLYR1	COPS6	DAD1	BANP	ATP6V1F
GMPS	COPZ1	DARS	BAP1	ATP6V1G1
GNL3	COQ4	DBR1	BARD1	ATP6V1H
GTF3C4	COX10	DDB1	BCAR1	ATR
HAUS1	COX11	DDX10	BCAS2	ATRIP
HAUS7	COX15	DDX18	BCL2L1	ATXN7
HEATR1	COX4I1	DDX20	BCLAF1	AURKA
HNRNPC	COX5B	DDX47	BCS1L	AURKAIP1
HNRNPK	COX6B1	DDX54	BDP1	AURKB
HNRNPL	CPSF1	DDX56	BIRC5	BANF1
HNRNPM	CPSF2	DHDDS	BMS1	BANP
HNRNPU	CPSF3	DHFRL1	BOP1	BAP1
HPS5	CPSF4	DHX15	BORA	BARD1
HSPA9	CRNKL1	DHX16	BRCA1	BCAR1
HSPB11	CSE1L	DHX37	BRCA2	BCAS2
HSPE1	CTDP1	DHX8	BRD4	BCL2L1
IARS2	CTPS1	DIMT1	BRD8	BCL2L2-PABPN1
ICK	CTR9	DONSON	BRF1	BCLAF1
IMP4	CYCS	DTL	BRF2	BCS1L
IMPAD1	DAD1	DTYMK	BRIX1	BDP1
INCENP	DBR1	DUT	BRK1	BIRC5
INTS9	DCTN5	DYNC1H1	BTF3L4	BIRC6
IQGAP1	DDB1	DYNC1I2	BUB1	BMS1
ISCU	DDOST	DYNLRB1	BUB1B	BOP1
JMJD1C	DDX10	ECD	BUB3	BORA
KARS	DDX18	EEF1A1	BUD13	BPTF
KPNB1	DDX20	EEF2	BUD31	BRCA1
KRAS	DDX21	EFTUD2	BYSL	BRCA2
LARS2	DDX27	EIF1	C11orf57	BRD4
LIAS	DDX41	EIF1AX	C12orf45	BRD8
LSM4	DDX47	EIF2B2	C14orf166	BRF1
LSM6	DDX49	EIF2B3	C14orf80	BRF2
LUC7L3	DDX55	EIF2B4	C17orf82	BRIX1
LZIC	DDX56	EIF2B5	C17orf89	BRK1
MAPK6	DGCR8	EIF2S1	C17orf96	BTF3L4
MAPKAP1	DHODH	EIF2S2	C19orf52	BUB1
MED12	DHPS	EIF2S3	C19orf53	BUB1B
MED14	DHX15	EIF3A	C1D	BUB3
MED30	DHX33	EIF3B	C1QBP	BUD13
MMAB	DHX37	EIF3D	C1QTNF4	BUD31
MRPS31	DHX8	EIF3F	C1orf109	BYSL
MSANTD3	DHX9	EIF3I	C21orf59	C10orf2
MTFMT	DIEXF	EIF4A1	C2orf27A	C11orf24
MTX1	DIMT1	EIF4A3	C3orf17	C11orf57
NAA10	DIS3	EIF4E	C7orf26	C12orf45
NAA38	DKC1	EIF5	C9orf114	C12orf66
NACA	DLST	EIF6	C9orf78	C14orf166
NAPA	DMAP1	EPRS	CACNB3	C14orf80
NAPG	DNAJA3	ERCC3	CACTIN	C17orf82
NCBP1	DNAJC9	ERH	CADM4	C17orf89
NEDD8	DNM2	ESPL1	CAMLG	C17orf96
NHP2L1	DNMT1	EXOSC3	CAP1	C19orf43
NPTN	DOLK	EXOSC9	CAPZB	C19orf52
NT5C2	DONSON	FAM86B1	CARS	C19orf53
NUDT21	DPAGT1	FARSA	CASC5	C1D
NUP133	DTL	FARSB	CBLL1	C1orf109
NUP205	DTYMK	FBXO5	CBLN1	C1QBP
NUP54	DYNC1I2	FCF1	CBWD2	C1QTNF4
NUP93	ECD	GARS	CBWD3	C21orf59
NUP98	EEF2	GGTLC2	CBWD5	C2orf27A
NUPL1	EFTUD2	GINS1	CBX1	C3orf17
NUTF2	EIF2B1	GINS2	CCAR1	C7orf26
NXF1	EIF2B3	GINS4	CCDC101	C9orf114
OPA1	EIF2B5	GNB2L1	CCDC115	C9orf78
PABPN1	EIF2S1	GNL3	CCDC130	CACNB3
PAFAH1B1	EIF2S2	GOLGA6A	CCDC137	CACTIN
PAPOLA	EIF2S3	GPN1	CCDC174	CADM4
PARN	EIF3A	GPN2	CCDC59	CAMLG
PCBP1	EIF3B	GRPEL1	CCDC84	CAP1
PCBP2	EIF3C	GSPT1	CCDC86	CAPZB
PDE8A	EIF3D	GTF2A2	CCDC94	CARS
PDHA1	EIF3G	GTF2B	CCNA2	CASC5
PFDN2	EIF3I	GTF2E1	CCNB1	CBLL1
PFN1	EIF4A3	GTF2E2	CCND1	CBLN1
PHB	EIF5A	GTPBP4	CCNH	CBWD1
PHB2	EIF5B	HAUS1	CCNK	CBWD2
PHF16	EIF6	HAUS3	CCNL1	CBWD3
PHF5A	ELAC2	HAUS4	CCT2	CBWD5
PHYH	ELL	HAUS5	CCT3	CBX1
PLAGL2	EPRS	HAUS6	CCT4	CCAR1
POLR1B	ERCC2	HCFC1	CCT5	CCDC101
POLR2D	ERCC3	HEATR1	CCT6A	CCDC115
POLR2F	ERH	HINFP	CCT8	CCDC130
POLR2I	EXOSC2	HIST1H2AJ	CDAN1	CCDC137
POP5	EXOSC3	HIST1H2AM	CDC123	CCDC174
PPIE	EXOSC4	HIST1H2BB	CDC16	CCDC59
PPP2R1A	EXOSC6	HIST1H2BC	CDC20	CCDC84
PPP2R2D	EXOSC7	HIST1H2BF	CDC23	CCDC86
PPP5C	EXOSC8	HIST1H2BH	CDC26	CCDC94
PREB	FAM96B	HIST1H2BJ	CDC27	CCNA2
PRKAA1	FARS2	HIST1H2BN	CDC37	CCNB1
PRKAB2	FARSA	HMGCS1	CDC40	CCND1
PRKDC	FARSB	HNRNPC	CDC42	CCNG1
PRPF18	FAU	HNRNPK	CDC45	CCNH
PRPF19	FNTA	HNRNPL	CDC5L	CCNK
PRPF3	FNTB	HSPA9	CDC6	CCNL1
PRPF31	FTSJ3	IGBP1	CDC7	CCT2
PRPF38A	GABPA	IMP3	CDC73	CCT3
PRPF8	GAPDH	INCENP	CDCA5	CCT4
PRUNE	GART	INTS2	CDCA8	CCT5
PSMA1	GEMIN5	INTS4	CDIPT	CCT6A
PSMA2	GEMIN8	INTS9	CDK1	CCT7
PSMA3	GFM1	ISCU	CDK11A	CCT8
PSMA4	GGPS1	KANSL2	CDK2	CDAN1
PSMA6	GINS2	KARS	CDK7	CDC123
PSMB2	GINS3	KAT8	CDK9	CDC16
PSMB3	GINS4	KIF11	CDT1	CDC20
PSMB5	GMPPB	KIF23	CEBPZ	CDC23
PSMB6	GMPS	KIN	CENPA	CDC26
PSMC1	GNB2L1	KPNB1	CENPC	CDC27
PSMC2	GNL3	KRTAP4-11	CENPE	CDC37
PSMC3	GPN3	KRTAP5-10	CENPH	CDC40
PSMC4	GPS1	KRTAP5-6	CENPK	CDC42
PSMD1	GRPEL1	KRTAP9-4	CENPN	CDC45
PSMD11	GRWD1	LARS	CENPT	CDC5L
PSMD12	GSPT1	LAS1L	CENPW	CDC6
PSMD13	GTF2B	LCE1E	CEP131	CDC7
PSMD2	GTF2H1	LSM2	CEP192	CDC73
PSMD4	GTF2H2C	LSM3	CEP68	CDCA5
PSMD7	GTF2H4	LSM4	CEP85	CDCA8
QARS	GTF3A	LSM5	CFAP20	CDIPT
RAN	GTF3C1	LSM7	CFDP1	CDK1
RANBP2	GTF3C2	LUC7L3	CFL1	CDK11A
RBM14	GTF3C5	MAD2L1	CHAF1A	CDK17
RBM17	GTPBP4	MAK16	CHAF1B	CDK2
RBM22	GUK1	MARS	CHCHD1	CDK7
RBM25	HARS	MAT2A	CHCHD2	CDK9
RBMX	HAUS1	MCM2	CHCHD4	CDT1
RILPL2	HAUS5	MCM3	CHD4	CEBPZ
RNF139	HCFC1	MCM3AP	CHEK1	CENPA
RPA1	HDAC3	MCM5	CHERP	CENPC
RPA2	HEATR1	MCM7	CHMP1A	CENPE
RPL10	HINFP	MDN1	CHMP2A	CENPH
RPL10A	HIST1H2AJ	MED11	CHMP4B	CENPK
RPL11	HIST2H2AA3	MED14	CHMP5	CENPM
RPL12	HJURP	MED20	CHMP6	CENPN
RPL13	HNRNPC	MED27	CHMP7	CENPT
RPL13A	HNRNPK	MED28	CHORDC1	CENPW
RPL14	HNRNPL	MED30	CHTF8	CEP131
RPL18	HNRNPU	MED31	CHTOP	CEP192
RPL18A	HSD17B10	MED4	CIAO1	CEP68
RPL19	HSPA9	MED6	CIAPIN1	CEP85
RPL23A	HSPD1	MEPCE	CINP	CFAP20
RPL24	HUWE1	MFAP1	CIRH1A	CFDP1
RPL26	HYPK	MPHOSPH10	CKAP5	CFL1
RPL27	IARS	MTBP	CLK2	CHAF1A
RPL3	IGBP1	MYC	CLNS1A	CHAF1B
RPL30	ILF3	MZT1	CLP1	CHCHD1
RPL31	IMP3	NAA38	CLSPN	CHCHD2
RPL32	IMP4	NAA50	CLTC	CHCHD4
RPL34	INTS1	NAPA	CMPK1	CHD4
RPL35	INTS3	NARFL	CMTR1	CHEK1
RPL35A	INTS8	NARS	CNIH4	CHERP
RPL36	INTS9	NAT10	CNN2	CHMP1A
RPL37	IPO13	NCAPG	CNOT1	CHMP2A
RPL37A	ISCU	NCBP1	CNOT2	CHMP4B
RPL38	ISG20L2	NCBP2	CNOT3	CHMP5
RPL4	KANSL3	NEDD1	COA7	CHMP6
RPL5	KARS	NEDD8	COASY	CHMP7
RPL6	KAT8	NHP2L1	COG1	CHORDC1
RPL7	KIF11	NIFK	COG2	CHTF8
RPL7A	KIF23	NIP7	COG3	CHTOP
RPLP0	KPNB1	NKAP	COG4	CIAO1
RPLP2	KRI1	NMD3	COG6	CIAPIN1
RPN2	KRR1	NOL10	COG8	CINP
RPP38	LARS	NOP16	COPA	CIRH1A
RPP40	LAS1L	NOP56	COPB1	CKAP5
RPS11	LONP1	NOP58	COPB2	CLK2
RPS12	LRR1	NPIPA5	COPE	CLNS1A
RPS13	LSG1	NPLOC4	COPG1	CLP1
RPS14	LSM11	NRDE2	COPS2	CLSPN
RPS15	LSM12	NRF1	COPS3	CLTC
RPS15A	LSM2	NSA2	COPS4	CMPK1
RPS17	LSM7	NSF	COPS5	CMTR1
RPS18	LUC7L3	NSL1	COPS6	CNIH4
RPS19	MAD2L1	NUBP1	COPS8	CNN2
RPS20	MAGOH	NUDT21	COPZ1	CNOT1
RPS24	MAK16	NUF2	COQ4	CNOT2
RPS25	MARS	NUP133	COX15	CNOT3
RPS26	MARS2	NUP155	COX17	COA5
RPS27A	MASTL	NUP160	COX5A	COA7
RPS3	MCM3	NUP214	COX5B	COASY
RPS3A	MCM3AP	NUP85	COX6C	COG1
RPS4X	MCM4	NUS1	COX7C	COG2
RPS5	MCM5	NUTF2	CPNE7	COG3
RPS6	MCM7	NVL	CPOX	COG4
RPS7	MDN1	OGT	CPSF1	COG6
RPS8	MED11	ORAOV1	CPSF2	COG8
RPS9	MED12	ORC6	CPSF3	COPA
RPSA	MED18	PAFAH1B1	CPSF3L	COPB1
RRM1	MED27	PAM16	CPSF4	COPB2
RRM2B	MED30	PCID2	CPSF6	COPE
RTF1	MEPCE	PCNA	CRCP	COPG1
RUVBL1	METTL16	PDCD7	CRLS1	COPS2
RUVBL2	MMS22L	PES1	CRNKL1	COPS3
SARS	MPHOSPH10	PFDN2	CS	COPS4
SDAD1	MRP63	PGAM4	CSE1L	COPS5
SF3A1	MRPL18	PHAX	CSNK1A1	COPS6
SF3A2	MRPL28	PHB	CSNK2B	COPS8
SF3B1	MRPL38	PHB2	CSTF1	COPZ1
SF3B2	MRPL4	PHF5A	CSTF3	COQ4
SF3B3	MRPL43	PISD	CTCF	COX10
SF3B4	MRPL45	PKMYT1	CTDP1	COX11
SF3B5	MRPL46	PLK1	CTNNBL1	COX15
SFPQ	MRPL53	PLK4	CTPS1	COX17
SHFM1	MRPS14	PLRG1	CTR9	COX4I1
SKIV2L2	MRPS24	POLA2	CTU2	COX5A
SLC25A43	MRPS34	POLD1	CUL1	COX5B
SMC1A	MSTO1	POLD2	CUL2	COX6B1
SMC3	MTG2	POLD3	CWC22	COX6C
SNRNP200	MVK	POLR1B	CWF19L2	COX7C
SNRNP27	MYBBP1A	POLR1C	CXXC1	CPNE7
SNRPB	MYC	POLR2A	CYC1	CPOX
SNRPC	NAA10	POLR2B	CYCS	CPSF1
SNRPD1	NAA38	POLR2C	CYP2A13	CPSF2
SNRPD2	NAA50	POLR2D	CYP4F11	CPSF3
SNW1	NAMPT	POLR2E	CYS1	CPSF3L
SON	NAPA	POLR2F	DAD1	CPSF4
SRBD1	NARFL	POLR2G	DAP3	CPSF6
SRCAP	NARS	POLR2H	DARS	CRCP
SRFBP1	NAT10	POLR2I	DBF4	CRLS1
SRRT	NCBP1	POLR2K	DBR1	CRNKL1
SRSF1	NCBP2	POLR2L	DCLRE1B	CS
SRSF3	NDC80	POLR3A	DCTN1	CSE1L
SSR1	NDUFA13	POLR3B	DCTN2	CSNK1A1
STRN	NEDD8	POLR3F	DCTN3	CSNK2B
SUPT5H	NELFB	PPIL2	DCTN4	CSTF1
SUPT6H	NHP2	PPWD1	DCTN5	CSTF3
SUPV3L1	NHP2L1	PRAMEF6	DCTN6	CTCF
TBC1D25	NIP7	PRC1	DDB1	CTDNEP1
TBCE	NKAP	PRELID1	DDN	CTDP1
TCERG1	NLE1	PRIM1	DDOST	CTNNBL1
TDRD3	NMD3	PRPF19	DDX1	CTPS1
TFIP11	NMT1	PRPF38A	DDX10	CTR9
THOP1	NOC4L	PRPF38B	DDX11	CTU2
TIMM10	NOL10	PRPF40A	DDX18	CUL1
TOMM40	NOL11	PRPF6	DDX19A	CUL2
TPR	NOL6	PRPF8	DDX20	CWC22
TRRAP	NOL9	PSMA1	DDX21	CWF19L2
TSEN2	NOP16	PSMA2	DDX23	CXXC1
TSTA3	NOP2	PSMA3	DDX24	CYC1
TUBA1B	NOP56	PSMA4	DDX27	CYCS
TUBB	NOP9	PSMA5	DDX41	CYP2A13
TUBGCP2	NPLOC4	PSMA6	DDX42	CYP4F11
U2AF1	NSA2	PSMA7	DDX46	CYS1
U2AF2	NSF	PSMB1	DDX47	DAD1
UBA1	NUDC	PSMB2	DDX49	DAP3
UBB	NUDCD3	PSMB3	DDX5	DARS
UBL4A	NUDT21	PSMB4	DDX51	DBF4
USP39	NUDT4	PSMB5	DDX52	DBR1
VCP	NUF2	PSMB6	DDX54	DCLRE1B
VTA1	NUP133	PSMB7	DDX55	DCTN1
WDR12	NUP155	PSMC1	DDX56	DCTN2
WDR33	NUP160	PSMC3	DDX59	DCTN3
WDR60	NUP214	PSMC4	DDX6	DCTN4
WDR61	NUP85	PSMC6	DENR	DCTN5
XAB2	NUP88	PSMD11	DGCR14	DCTN6
XIAP	NUP93	PSMD12	DHDDS	DDB1
XPO1	NUS1	PSMD14	DHFR	DDN
YY1	NUTF2	PSMD2	DHODH	DDOST
ZBTB48	NVL	PSMD3	DHPS	DDX1
ZC3H13	NXF1	PSMD6	DHX15	DDX10
ZC3H18	OGDH	PUF60	DHX16	DDX11
ZFR	OGT	PWP2	DHX33	DDX18
ZNF160	ORAOV1	QARS	DHX36	DDX19A
ZNF207	ORC6	RABGGTB	DHX37	DDX20
	OSGEP	RACGAP1	DHX8	DDX21
	PABPC1	RAD51	DHX9	DDX23
	PAFAH1B1	RAN	DICER1	DDX24
	PAICS	RANGAP1	DIEXF	DDX27
	PAK1IP1	RBBP6	DIMT1	DDX41
	PCID2	RBM14	DIS3	DDX42
	PCNA	RBM17	DMAP1	DDX46
	PFDN2	RBM25	DNAJA3	DDX47
	PFN1	RBMX	DNAJC11	DDX49
	PGAM1	RBX1	DNAJC17	DDX5
	PGGT1B	RCC1	DNAJC8	DDX51
	PGK1	RCL1	DNAJC9	DDX52
	PHB	RFC3	DNM1	DDX54
	PHB2	RFC4	DNM1L	DDX55
	PHF5A	RFC5	DNM2	DDX56
	PKMYT1	RGPD6	DNTTIP2	DDX59
	PLK1	RHEB	DOHH	DDX6
	PLRG1	RIOK1	DOLK	DENR
	PMPCA	RIOK2	DONSON	DGCR14
	PMPCB	RNF113A	DPAGT1	DGCR8
	PNKP	RNGTT	DPH3	DHDDS
	POLA2	RPA1	DPH6	DHFR
	POLR1A	RPA2	DPM2	DHFRL1
	POLR1B	RPA3	DPPA2	DHODH
	POLR1C	RPAP1	DPPA5	DHPS
	POLR2A	RPF2	DPY19L2	DHX15
	POLR2B	RPL10A	DR1	DHX16
	POLR2C	RPL11	DRAP1	DHX33
	POLR2D	RPL12	DRG1	DHX36
	POLR2E	RPL13	DSN1	DHX37
	POLR2G	RPL13A	DTL	DHX8
	POLR2H	RPL14	DTYMK	DHX9
	POLR2I	RPL15	DUT	DICER1
	POLR2L	RPL17	DYNC1H1	DIEXF
	POLR3A	RPL18	DYNC1I2	DIMT1
	POLR3C	RPL18A	DYNLL1	DIS3
	POLR3H	RPL19	DYNLRB1	DKC1
	POLR3K	RPL21	E2F6	DLG5
	POLRMT	RPL22	E4F1	DLST
	POP1	RPL23	EARS2	DMAP1
	POP5	RPL23A	EBNA1BP2	DNAJA3
	PPA1	RPL26	ECD	DNAJC1
	PPAN	RPL27	ECT2	DNAJC11
	PPAT	RPL27A	EDC4	DNAJC17
	PPIL2	RPL3	EEF1A1	DNAJC8
	PPP2CA	RPL30	EEF1B2	DNAJC9
	PPP2R4	RPL31	EEF1G	DNM1
	PPP4C	RPL32	EEF2	DNM1L
	PPWD1	RPL34	EFTUD1	DNM2
	PREB	RPL35	EFTUD2	DNMT1
	PRELID1	RPL35A	EIF1	DNTTIP2
	PRIM1	RPL36	EIF1AD	DOHH
	PRMT1	RPL36A	EIF2B1	DOLK
	PRMT5	RPL37A	EIF2B2	DONSON
	PRPF19	RPL38	EIF2B3	DPAGT1
	PRPF31	RPL4	EIF2B4	DPH3
	PRPF38A	RPL5	EIF2B5	DPH6
	PRPF38B	RPL6	EIF2S1	DPM2
	PRPF4	RPL7	EIF2S2	DPPA2
	PRPF8	RPL7L1	EIF3A	DPPA5
	PSMA1	RPL8	EIF3B	DPY19L2
	PSMA2	RPLP0	EIF3CL	DR1
	PSMA3	RPLP1	EIF3D	DRAP1
	PSMA4	RPLP2	EIF3E	DRG1
	PSMA5	RPP38	EIF3F	DSN1
	PSMA6	RPS11	EIF3G	DTL
	PSMA7	RPS12	EIF3H	DTYMK
	PSMB1	RPS13	EIF3I	DUT
	PSMB2	RPS14	EIF3L	DYNC1H1
	PSMB3	RPS15	EIF3M	DYNC1I2
	PSMB4	RPS15A	EIF4A1	DYNLL1
	PSMB7	RPS16	EIF4A3	DYNLRB1
	PSMC2	RPS18	EIF4B	E2F6
	PSMC3	RPS19	EIF4E	E4F1
	PSMC5	RPS2	EIF4G1	EARS2
	PSMC6	RPS20	EIF4G2	EBNA1BP2
	PSMD1	RPS21	EIF5	ECD
	PSMD11	RPS23	EIF5A	ECT2
	PSMD12	RPS24	EIF6	EDC4
	PSMD13	RPS27A	ELAC2	EEF1A1
	PSMD14	RPS28	ELL	EEF1B2
	PSMD3	RPS3	ELP2	EEF1G
	PSMD4	RPS4X	ELP3	EEF2
	PSMG3	RPS5	ELP5	EFTUD1
	PTPN23	RPS6	ELP6	EFTUD2
	PUF60	RPS7	EMC1	EIF1
	PWP2	RPS8	EMC3	EIF1AD
	QARS	RPS9	EMC4	EIF1AX
	RABGGTB	RPSA	EMC7	EIF2B1
	RACGAP1	RRM1	ENO1	EIF2B2
	RAD21	RRM2	ENTHD2	EIF2B3
	RAD51C	RRN3	EP400	EIF2B4
	RAD51D	RRP9	EPRS	EIF2B5
	RAE1	RSL1D1	ERCC2	EIF2S1
	RAN	RSL24D1	ERCC3	EIF2S2
	RANGAP1	RTFDC1	ERH	EIF2S3
	RARS2	RUVBL2	ERVW-1	EIF3A
	RBBP6	SACM1L	ESF1	EIF3B
	RBM14	SARS	ESPL1	EIF3C
	RBM17	SART3	ESPN	EIF3CL
	RBM8A	SBDS	ETF1	EIF3D
	RBMX	SCFD1	EWSR1	EIF3E
	RBX1	SDAD1	EXOC1	EIF3F
	RCC1	SDE2	EXOC2	EIF3G
	RCL1	SEC13	EXOC3	EIF3H
	RFC2	SEC61G	EXOC4	EIF3I
	RFC4	SENP6	EXOC5	EIF3L
	RFC5	SF1	EXOC7	EIF3M
	RFK	SF3A1	EXOC8	EIF4A1
	RHEB	SF3A2	EXOSC1	EIF4A3
	RIOK2	SF3A3	EXOSC10	EIF4B
	RNF20	SF3B14	EXOSC2	EIF4E
	RNGTT	SF3B2	EXOSC3	EIF4G1
	ROMO1	SF3B3	EXOSC4	EIF4G2
	RPA1	SF3B4	EXOSC5	EIF5
	RPA2	SF3B5	EXOSC6	EIF5A
	RPF2	SFPQ	EXOSC7	EIF5B
	RPL10A	SKIV2L2	EXOSC8	EIF6
	RPL11	SLMO2	EXOSC9	ELAC2
	RPL12	SLU7	FAF2	ELL
	RPL13	SMC1A	FAM133B	ELP2
	RPL14	SMC2	FAM136A	ELP3
	RPL18	SMC4	FAM231A	ELP5
	RPL18A	SMU1	FAM25G	ELP6
	RPL19	SNAPC1	FAM32A	EMC1
	RPL23	SNAPC3	FAM60A	EMC3
	RPL24	SNRNP200	FAM63B	EMC4
	RPL27	SNRNP27	FAM72B	EMC7
	RPL27A	SNRNP70	FAM86A	ENO1
	RPL3	SNRPA1	FAM86B1	ENTHD2
	RPL30	SNRPB	FAM96B	EP400
	RPL35	SNRPD1	FARS2	EPRS
	RPL35A	SNRPD2	FARSA	ERAP1
	RPL36	SNRPD3	FARSB	ERCC2
	RPL37A	SNRPE	FASTKD5	ERCC3
	RPL4	SNRPF	FAU	ERH
	RPL6	SNRPG	FBL	ERVW-1
	RPL8	SNW1	FBLIM1	ESF1
	RPLP0	SPC24	FBXO5	ESPL1
	RPLP1	SPC25	FCF1	ESPN
	RPLP2	SPDL1	FDPS	ETF1
	RPP21	SRBD1	FDXR	EWSR1
	RPP38	SRP19	FEN1	EXOC1
	RPS11	SRP54	FGFR1OP	EXOC2
	RPS12	SRSF1	FIP1L1	EXOC3
	RPS13	SRSF2	FNBP4	EXOC4
	RPS15A	SRSF3	FNTA	EXOC5
	RPS16	SRSF7	FNTB	EXOC7
	RPS18	SS18L2	FOXD4	EXOC8
	RPS19	SSRP1	FOXD4L6	EXOSC1
	RPS2	SSU72	FOXL2	EXOSC10
	RPS20	SUPT16H	FRG2	EXOSC2
	RPS21	SUPT5H	FTSJ3	EXOSC3
	RPS23	SUPT6H	FXN	EXOSC4
	RPS3	SYMPK	GABPA	EXOSC5
	RPS4X	TARS	GALP	EXOSC6
	RPS5	TBC1D3F	GAPDH	EXOSC7
	RPS6	TCEB1	GAR1	EXOSC8
	RPS7	TCEB2	GARS	EXOSC9
	RPS8	TCP1	GBF1	FAF2
	RRM1	TFIP11	GCN1L1	FAM133B
	RRP1	THOC2	GEMIN4	FAM136A
	RRP12	THOC3	GEMIN5	FAM231A
	RRS1	THOC5	GEMIN6	FAM25G
	RTCB	TICRR	GEMIN7	FAM32A
	RUVBL2	TIMELESS	GFER	FAM60A
	SACM1L	TNPO3	GFM1	FAM63B
	SAE1	TONSL	GGPS1	FAM72B
	SAMM50	TOP1	GGTLC2	FAM86A
	SAP18	TOP2A	GINS1	FAM86B1
	SARS	TOPBP1	GINS2	FAM96B
	SARS2	TRAPPC2	GINS3	FARS2
	SART3	TRAPPC3	GINS4	FARSA
	SBNO1	TRAPPC8	GJA3	FARSB
	SDAD1	TRMT112	GLE1	FASTKD5
	SDHC	TSG101	GLRX5	FAU
	SEC13	TSR2	GLTSCR2	FBL
	SEH1L	TTC27	GMPPB	FBLIM1
	SF1	TUBA1B	GMPS	FBXO5
	SF3A2	TUBA1C	GNB1L	FCF1
	SF3A3	TUBB	GNB2L1	FDPS
	SF3B1	TUBGCP2	GNL2	FDXR
	SF3B2	TUBGCP3	GNL3	FEN1
	SF3B3	TUBGCP4	GOLGA6A	FGFR1OP
	SF3B5	TUT1	GOLGA6L1	FIP1L1
	SKP1	TWISTNB	GOLGA6L6	FLAD1
	SLC35B1	TXNL4A	GOLGA8K	FNBP4
	SLMO2	U2AF1	GOSR2	FNTA
	SLU7	U2AF2	GPN1	FNTB
	SMC1A	U2SURP	GPN2	FOXD4
	SMC2	UBA1	GPN3	FOXD4L6
	SMC4	UBA52	GPR61	FOXL2
	SMU1	UBB	GPS1	FRG2
	SNAPC1	UBE2I	GRB2	FTSJ3
	SNAPC2	UBL5	GRPEL1	FXN
	SNAPC4	UBTF	GRSF1	GABPA
	SNRNP200	UFD1L	GRWD1	GALP
	SNRNP25	UPF1	GSDMA	GAPDH
	SNRNP27	UPF2	GSPT1	GAR1
	SNRNP35	URI1	GSTT2B	GARS
	SNRNP70	USP39	GTF2A1	GART
	SNRPA1	USPL1	GTF2A2	GBF1
	SNRPD1	UTP15	GTF2B	GCN1L1
	SNRPD2	UTP20	GTF2E1	GEMIN2
	SNRPD3	VARS	GTF2E2	GEMIN4
	SNRPF	VCP	GTF2F2	GEMIN5
	SNW1	VPS25	GTF2H1	GEMIN6
	SPATA5L1	VPS28	GTF2H2	GEMIN7
	SPC24	WARS	GTF2H2C	GEMIN8
	SPC25	WBSCR22	GTF2H3	GFER
	SRBD1	WDR12	GTF2H4	GFM1
	SRP19	WDR33	GTF3A	GGPS1
	SRRM1	WDR43	GTF3C1	GGTLC2
	SRRT	WDR70	GTF3C2	GINS1
	SRSF1	WDR75	GTF3C4	GINS2
	SRSF2	WEE1	GTF3C5	GINS3
	SRSF3	XAB2	GTF3C6	GINS4
	SRSF7	XRCC6	GTPBP4	GJA3
	SS18L2	YAE1D1	GUK1	GLE1
	SSU72	YARS	H2AFX	GLRX5
	SUPT5H	YBX1	H2AFZ	GLTSCR2
	SUPT6H	ZNF131	H3F3A	GLYR1
	SUPV3L1		HAMP	GMPPB
	SYMPK		HARS	GMPS
	SYS1		HARS2	GNB1L
	TAF1B		HAUS1	GNB2L1
	TAF6		HAUS3	GNL2
	TANGO6		HAUS4	GNL3
	TARS		HAUS5	GOLGA6A
	TBCD		HAUS6	GOLGA6L1
	TBL3		HAUS8	GOLGA6L6
	TCP1		HDAC3	GOLGA8K
	TELO2		HEATR1	GOSR2
	TFAM		HECTD1	GPN1
	TFRC		HGS	GPN2
	THOC2		HINFP	GPN3
	THOC3		HIRA	GPR61
	THOC5		HIST1H2AB	GPS1
	TICRR		HIST1H2AE	GRB2
	TIMM10		HIST1H2AI	GRPEL1
	TIMM13		HIST1H2BC	GRSF1
	TIMM23		HIST1H2BE	GRWD1
	TIMM44		HIST1H2BJ	GSDMA
	TMEM258		HIST1H2BL	GSPT1
	TNPO3		HIST1H2BM	GSTT2B
	TOMM22		HIST1H2BN	GTF2A1
	TOMM40		HIST2H2AC	GTF2A2
	TONSL		HIST2H2BF	GTF2B
	TOP1		HIST2H3A	GTF2E1
	TOP2A		HIST2H3D	GTF2E2
	TPT1		HJURP	GTF2F2
	TPX2		HLA-C	GTF2H1
	TRAPPC1		HMGA1	GTF2H2
	TRAPPC3		HMGB1	GTF2H2C
	TRIAP1		HMGCR	GTF2H3
	TRMT112		HMGCS1	GTF2H4
	TRMT5		HMGN2	GTF3A
	TRNAU1AP		HNRNPC	GTF3C1
	TRRAP		HNRNPH1	GTF3C2
	TSR1		HNRNPK	GTF3C4
	TTC1		HNRNPL	GTF3C5
	TTC27		HNRNPM	GTF3C6
	TTI1		HNRNPR	GTPBP4
	TTI2		HNRNPU	GUK1
	TUBB		HOXC10	H2AFX
	TUBG1		HS6ST1	H2AFZ
	TUBGCP2		HSCB	H3F3A
	TUBGCP3		HSD17B12	HAMP
	TUBGCP6		HSF1	HARS
	TUFM		HSP90B1	HARS2
	TUT1		HSPA5	HAUS1
	TXN		HSPA9	HAUS3
	TXNL4A		HSPD1	HAUS4
	U2AF1		HSPE1	HAUS5
	U2AF2		HYOU1	HAUS6
	UBA1		HYPK	HAUS7
	UBA52		IARS	HAUS8
	UBE2L3		IARS2	HCFC1
	UBE2M		ICE1	HDAC3
	UBE2N		ICE2	HEATR1
	UBL5		IFITM2	HECTD1
	UBTF		IFITM3	HGS
	UPF1		IK	HINFP
	UPF2		IKBKAP	HIRA
	UQCRC1		ILF2	HIST1H2AB
	UQCRFS1		ILF3	HIST1H2AE
	UROD		IMP3	HIST1H2AI
	USP39		IMP4	HIST1H2AJ
	USP5		INCENP	HIST1H2AM
	USPL1		ING3	HIST1H2BB
	UTP15		INO80	HIST1H2BC
	UTP20		INTS1	HIST1H2BE
	UTP23		INTS2	HIST1H2BF
	UXT		INTS3	HIST1H2BH
	VARS		INTS4	HIST1H2BJ
	VARS2		INTS5	HIST1H2BL
	VCP		INTS6	HIST1H2BM
	VPS25		INTS7	HIST1H2BN
	VPS28		INTS8	HIST2H2AA3
	WARS		INTS9	HIST2H2AC
	WBSCR22		IPO11	HIST2H2BF
	WDR12		IPO13	HIST2H3A
	WDR25		IPO7	HIST2H3D
	WDR3		IPO9	HJURP
	WDR33		ISCA2	HLA-C
	WDR43		ISCU	HMGA1
	WDR61		ISG20L2	HMGB1
	WDR70		ISY1	HMGCR
	WDR74		JAZF1	HMGCS1
	WDR75		JMJD6	HMGN2
	WDR77		KANSL2	HNRNPC
	WDR92		KANSL3	HNRNPH1
	WEE1		KARS	HNRNPK
	XAB2		KAT5	HNRNPL
	XPO1		KAT8	HNRNPM
	XRCC6		KATNB1	HNRNPR
	YARS		KCMF1	HNRNPU
	YARS2		KCNA10	HOXC10
	YRDC		KDM2A	HPS5
	ZBTB8OS		KDM8	HS6ST1
	ZMAT5		KIAA0391	HSCB
	ZNF131		KIAA1429	HSD17B10
	ZNF259		KIF11	HSD17B12
	ZNF574		KIF14	HSF1
			KIF18A	HSP90B1
			KIF23	HSPA5
			KIN	HSPA9
			KLC2	HSPB11
			KLHL11	HSPD1
			KPNA6	HSPE1
			KPNB1	HUWE1
			KRI1	HYOU1
			KRR1	HYPK
			KRT10	IARS
			KRT8	IARS2
			KRTAP4-2	ICE1
			KRTAP5-7	ICE2
			KTI12	ICK
			LAMTOR2	IFITM2
			LAMTOR3	IFITM3
			LAMTOR4	IGBP1
			LARS	IK
			LCE1C	IKBKAP
			LCE1E	ILF2
			LENG8	ILF3
			LETM1	IMP3
			LONP1	IMP4
			LPA	IMPAD1
			LRPPRC	INCENP
			LRR1	ING3
			LRRC37A3	INO80
			LRRC37B	INTS1
			LSG1	INTS2
			LSM11	INTS3
			LSM2	INTS4
			LSM3	INTS5
			LSM4	INTS6
			LSM5	INTS7
			LSM6	INTS8
			LSM7	INTS9
			LSM8	IPO11
			LTBP3	IPO13
			LTV1	IPO7
			LUC7L3	IPO9
			LYRM4	IQGAP1
			MAD2L1	ISCA2
			MAD2L2	ISCU
			MAGOH	ISG20L2
			MAK16	ISY1
			MANF	JAZF1
			MARS	JMJD1C
			MARS2	JMJD6
			MASTL	KANSL2
			MAT2A	KANSL3
			MAU2	KARS
			MAX	KAT5
			MBTPS1	KAT8
			MCM2	KATNB1
			MCM3	KCMF1
			MCM3AP	KCNA10
			MCM4	KDM2A
			MCM5	KDM8
			MCM6	KIAA0391
			MCM7	KIAA1429
			MCMBP	KIF11
			MCRS1	KIF14
			MDN1	KIF18A
			MED1	KIF23
			MED10	KIN
			MED11	KLC2
			MED17	KLHL11
			MED18	KPNA6
			MED20	KPNB1
			MED21	KRAS
			MED22	KRI1
			MED26	KRR1
			MED28	KRT10
			MED29	KRT8
			MED30	KRTAP4-11
			MED31	KRTAP4-2
			MED4	KRTAP5-10
			MED6	KRTAP5-6
			MED7	KRTAP5-7
			MED8	KRTAP9-4
			MED9	KTI12
			MEPCE	LAMTOR2
			METAP2	LAMTOR3
			METTL1	LAMTOR4
			METTL14	LARS
			METTL16	LARS2
			METTL17	LAS1L
			METTL3	LCE1C
			MEX3A	LCE1E
			MFAP1	LENG8
			MINOS1	LETM1
			MIOS	LIAS
			MIS12	LONP1
			MIS18A	LPA
			MIS18BP1	LRPPRC
			MKRN1	LRR1
			MLST8	LRRC37A3
			MMS19	LRRC37B
			MMS22L	LSG1
			MNAT1	LSM11
			MOB4	LSM12
			MOCS3	LSM2
			MOG	LSM3
			MPHOSPH10	LSM4
			MRGBP	LSM5
			MRPL10	LSM6
			MRPL12	LSM7
			MRPL13	LSM8
			MRPL14	LTBP3
			MRPL15	LTV1
			MRPL16	LUC7L3
			MRPL18	LYRM4
			MRPL19	LZIC
			MRPL2	MAD2L1
			MRPL21	MAD2L2
			MRPL27	MAGOH
			MRPL28	MAK16
			MRPL3	MANF
			MRPL32	MAPK6
			MRPL33	MAPKAP1
			MRPL34	MARS
			MRPL35	MARS2
			MRPL36	MASTL
			MRPL38	MAT2A
			MRPL39	MAU2
			MRPL4	MAX
			MRPL41	MBTPS1
			MRPL43	MCM2
			MRPL45	MCM3
			MRPL49	MCM3AP
			MRPL50	MCM4
			MRPL53	MCM5
			MRPL54	MCM6
			MRPL55	MCM7
			MRPL57	MCMBP
			MRPL9	MCRS1
			MRPS10	MDN1
			MRPS11	MED1
			MRPS12	MED10
			MRPS14	MED11
			MRPS16	MED12
			MRPS18B	MED14
			MRPS21	MED17
			MRPS22	MED18
			MRPS23	MED20
			MRPS24	MED21
			MRPS25	MED22
			MRPS26	MED26
			MRPS27	MED27
			MRPS34	MED28
			MRPS35	MED29
			MRPS5	MED30
			MRPS6	MED31
			MRPS7	MED4
			MRPS9	MED6
			MRTO4	MED7
			MSRB1	MED8
			MST1	MED9
			MSTO1	MEPCE
			MT2A	METAP2
			MTBP	METTL1
			MTOR	METTL14
			MTPAP	METTL16
			MTRNR2L1	METTL17
			MTRNR2L8	METTL3
			MVD	MEX3A
			MVK	MFAP1
			MYBBP1A	MINOS1
			MYBL2	MIOS
			MYC	MIS12
			MYCBP	MIS18A
			MYO1H	MIS18BP1
			MZF1	MKRN1
			MZT1	MLST8
			N6AMT1	MMAB
			NAA15	MMS19
			NAA20	MMS22L
			NAA25	MNAT1
			NAA35	MOB4
			NAA50	MOCS3
			NACA	MOG
			NAE1	MPHOSPH10
			NAF1	MRGBP
			NAGLU	MRP63
			NAPA	MRPL10
			NAPG	MRPL12
			NARFL	MRPL13
			NARS	MRPL14
			NASP	MRPL15
			NAT10	MRPL16
			NBAS	MRPL18
			NBPF11	MRPL19
			NBPF3	MRPL2
			NCAPD2	MRPL21
			NCAPD3	MRPL27
			NCAPG	MRPL28
			NCAPG2	MRPL3
			NCAPH	MRPL32
			NCAPH2	MRPL33
			NCBP1	MRPL34
			NCBP2	MRPL35
			NCKAP1	MRPL36
			NCL	MRPL38
			NDC1	MRPL39
			NDC80	MRPL4
			NDNL2	MRPL41
			NDOR1	MRPL43
			NDUFA11	MRPL45
			NDUFA2	MRPL46
			NDUFA6	MRPL49
			NDUFAB1	MRPL50
			NDUFAF3	MRPL53
			NDUFB4	MRPL54
			NDUFB6	MRPL55
			NDUFB8	MRPL57
			NDUFS5	MRPL9
			NEDD1	MRPS10
			NEDD8	MRPS11
			NELFA	MRPS12
			NELFB	MRPS14
			NELFE	MRPS16
			NFATC2IP	MRPS18B
			NFKBIE	MRPS21
			NFRKB	MRPS22
			NFS1	MRPS23
			NFYB	MRPS24
			NFYC	MRPS25
			NHLRC2	MRPS26
			NHP2	MRPS27
			NHP2L1	MRPS31
			NIFK	MRPS34
			NIP7	MRPS35
			NLE1	MRPS5
			NMD3	MRPS6
			NMT1	MRPS7
			NOB1	MRPS9
			NOC2L	MRTO4
			NOC3L	MSANTD3
			NOC4L	MSRB1
			NOL10	MST1
			NOL11	MSTO1
			NOL12	MT2A
			NOL6	MTBP
			NOL7	MTFMT
			NOL8	MTG2
			NOL9	MTOR
			NOLC1	MTPAP
			NOM1	MTRNR2L1
			NOMO3	MTRNR2L8
			NOP10	MTX1
			NOP14	MVD
			NOP16	MVK
			NOP2	MYBBP1A
			NOP56	MYBL2
			NOP58	MYC
			NOP9	MYCBP
			NOS1AP	MYO1H
			NOTCH2NL	MZF1
			NPAT	MZT1
			NPB	N6AMT1
			NPEPPS	NAA10
			NPIPA1	NAA15
			NPIPA5	NAA20
			NPLOC4	NAA25
			NPM1	NAA35
			NPM3	NAA38
			NR2C2AP	NAA50
			NRBP1	NACA
			NRDE2	NAE1
			NRF1	NAF1
			NSA2	NAGLU
			NSF	NAMPT
			NSL1	NAPA
			NSMCE1	NAPG
			NUBP1	NARFL
			NUBP2	NARS
			NUDC	NASP
			NUDCD3	NAT10
			NUDT21	NBAS
			NUDT4	NBPF11
			NUF2	NBPF3
			NUMA1	NCAPD2
			NUP107	NCAPD3
			NUP133	NCAPG
			NUP153	NCAPG2
			NUP155	NCAPH
			NUP160	NCAPH2
			NUP205	NCBP1
			NUP214	NCBP2
			NUP35	NCKAP1
			NUP43	NCL
			NUP54	NDC1
			NUP62	NDC80
			NUP85	NDNL2
			NUP88	NDOR1
			NUP93	NDUFA11
			NUP98	NDUFA13
			NUS1	NDUFA2
			NUTF2	NDUFA6
			NVL	NDUFAB1
			NXF1	NDUFAF3
			OGFOD1	NDUFB4
			OIP5	NDUFB6
			OLFML3	NDUFB8
			OR11H1	NDUFS5
			OR1D2	NEDD1
			OR2T29	NEDD8
			OR2T5	NELFA
			OR4F21	NELFB
			OR4F4	NELFE
			OR4K1	NFATC2IP
			OR4N2	NFKBIE
			OR7A10	NFRKB
			OR7A17	NFS1
			ORAOV1	NFYB
			ORC1	NFYC
			ORC3	NHLRC2
			ORC4	NHP2
			ORC6	NHP2L1
			OSGEP	NIFK
			OSTC	NIP7
			OTOP1	NKAP
			PABPC1	NLE1
			PABPN1	NMD3
			PAF1	NMT1
			PAFAH1B1	NOB1
			PAK1IP1	NOC2L
			PAM16	NOC3L
			PARS2	NOC4L
			PAXBP1	NOL10
			PC	NOL11
			PCBP1	NOL12
			PCBP2	NOL6
			PCF11	NOL7
			PCID2	NOL8
			PCNA	NOL9
			PDAP1	NOLC1
			PDCD11	NOM1
			PDCD2	NOMO3
			PDCD5	NOP10
			PDCD6	NOP14
			PDCD7	NOP16
			PDE4DIP	NOP2
			PDPK1	NOP56
			PDRG1	NOP58
			PEF1	NOP9
			PELO	NOS1AP
			PELP1	NOTCH2NL
			PES1	NPAT
			PFDN1	NPB
			PFDN2	NPEPPS
			PFDN4	NPIPA1
			PFDN5	NPIPA5
			PFDN6	NPLOC4
			PFN1	NPM1
			PGAM1	NPM3
			PGD	NPTN
			PGS1	NR2C2AP
			PHAX	NRBP1
			PHB	NRDE2
			PHB2	NRF1
			PHF12	NSA2
			PHF5A	NSF
			PI4KA	NSL1
			PIGH	NSMCE1
			PIK3C3	NT5C2
			PIK3R4	NUBP1
			PKM	NUBP2
			PKMYT1	NUDC
			PLA2G10	NUDCD3
			PLK1	NUDT21
			PLK4	NUDT4
			PLRG1	NUF2
			PMF1	NUMA1
			PMPCA	NUP107
			PMPCB	NUP133
			PNKP	NUP153
			PNN	NUP155
			PNO1	NUP160
			PNPT1	NUP205
			POGZ	NUP214
			POLA2	NUP35
			POLD1	NUP43
			POLD2	NUP54
			POLD3	NUP62
			POLE	NUP85
			POLE2	NUP88
			POLG2	NUP93
			POLR1A	NUP98
			POLR1B	NUPL1
			POLR1C	NUS1
			POLR1E	NUTF2
			POLR2A	NVL
			POLR2B	NXF1
			POLR2C	OGDH
			POLR2D	OGFOD1
			POLR2E	OGT
			POLR2F	OIP5
			POLR2G	OLFML3
			POLR2H	OPA1
			POLR2I	OR11H1
			POLR2J	OR1D2
			POLR2K	OR2T29
			POLR2L	OR2T5
			POLR3A	OR4F21
			POLR3B	OR4F4
			POLR3C	OR4K1
			POLR3D	OR4N2
			POLR3E	OR7A10
			POLR3F	OR7A17
			POLR3H	ORAOV1
			POLR3K	ORC1
			POLRMT	ORC3
			POP1	ORC4
			POP5	ORC6
			POP7	OSGEP
			POTEG	OSTC
			POU5F1B	OTOP1
			PPA1	PABPC1
			PPAN	PABPN1
			PPARGC1B	PAF1
			PPIA	PAFAH1B1
			PPIE	PAICS
			PPIH	PAK1IP1
			PPIL1	PAM16
			PPIL2	PAPOLA
			PPIL4	PARN
			PPP1CA	PARS2
			PPP1CB	PAXBP1
			PPP1R10	PC
			PPP1R11	PCBP1
			PPP1R12A	PCBP2
			PPP1R15B	PCF11
			PPP1R2	PCID2
			PPP1R7	PCNA
			PPP1R8	PDAP1
			PPP2CA	PDCD11
			PPP2R1A	PDCD2
			PPP2R3C	PDCD5
			PPP2R4	PDCD6
			PPP4C	PDCD7
			PPP4R2	PDE4DIP
			PPP6C	PDE8A
			PPRC1	PDHA1
			PPWD1	PDPK1
			PPY	PDRG1
			PRAMEF5	PEF1
			PRAMEF6	PELO
			PRC1	PELP1
			PRDM10	PES1
			PREB	PFDN1
			PRELID1	PFDN2
			PRIM1	PFDN4
			PRKRA	PFDN5
			PRKRIP1	PFDN6
			PRKRIR	PFN1
			PRMT1	PGAM1
			PRMT5	PGAM4
			PRPF18	PGD
			PRPF19	PGGT1B
			PRPF3	PGK1
			PRPF31	PGS1
			PRPF38A	PHAX
			PRPF38B	PHB
			PRPF4	PHB2
			PRPF40A	PHF12
			PRPF6	PHF16
			PRPF8	PHF5A
			PRRC2A	PHYH
			PSAT1	PI4KA
			PSMA1	PIGH
			PSMA2	PIK3C3
			PSMA3	PIK3R4
			PSMA4	PISD
			PSMA5	PKM
			PSMA6	PKMYT1
			PSMA7	PLA2G10
			PSMB1	PLAGL2
			PSMB2	PLK1
			PSMB3	PLK4
			PSMB4	PLRG1
			PSMB5	PMF1
			PSMB6	PMPCA
			PSMB7	PMPCB
			PSMC1	PNKP
			PSMC2	PNN
			PSMC3	PNO1
			PSMC4	PNPT1
			PSMC5	POGZ
			PSMC6	POLA2
			PSMD1	POLD1
			PSMD11	POLD2
			PSMD12	POLD3
			PSMD13	POLE
			PSMD14	POLE2
			PSMD2	POLG2
			PSMD3	POLR1A
			PSMD4	POLR1B
			PSMD6	POLR1C
			PSMD7	POLR1E
			PSMD8	POLR2A
			PSME1	POLR2B
			PSMG1	POLR2C
			PSMG2	POLR2D
			PSMG3	POLR2E
			PSMG4	POLR2F
			PSTK	POLR2G
			PTBP1	POLR2H
			PTCD3	POLR2I
			PTK2	POLR2J
			PTMA	POLR2K
			PTPMT1	POLR2L
			PTPN23	POLR3A
			PUF60	POLR3B
			PWP1	POLR3C
			PWP2	POLR3D
			PYROXD1	POLR3E
			QARS	POLR3F
			RAB6A	POLR3H
			RABGGTA	POLR3K
			RABGGTB	POLRMT
			RAC1	POP1
			RAC3	POP5
			RACGAP1	POP7
			RAD17	POTEG
			RAD21	POU5F1B
			RAD51	PPA1
			RAD51C	PPAN
			RAD51D	PPARGC1B
			RAD9A	PPAT
			RAE1	PPIA
			RAN	PPIE
			RANBP2	PPIH
			RANGAP1	PPIL1
			RARS	PPIL2
			RARS2	PPIL4
			RBBP4	PPP1CA
			RBBP5	PPP1CB
			RBBP6	PPP1R10
			RBBP8	PPP1R11
			RBM14	PPP1R12A
			RBM17	PPP1R15B
			RBM19	PPP1R2
			RBM22	PPP1R7
			RBM25	PPP1R8
			RBM28	PPP2CA
			RBM39	PPP2R1A
			RBM4	PPP2R2D
			RBM42	PPP2R3C
			RBM48	PPP2R4
			RBM8A	PPP4C
			RBMXL1	PPP4R2
			RCC1	PPP5C
			RCL1	PPP6C
			RCOR1	PPRC1
			REV3L	PPWD1
			REXO2	PPY
			RFC2	PRAMEF5
			RFC3	PRAMEF6
			RFC4	PRC1
			RFC5	PRDM10
			RFT1	PREB
			RGPD6	PRELID1
			RHOQ	PRIM1
			RIC1	PRKAA1
			RINT1	PRKAB2
			RIOK1	PRKDC
			RIOK2	PRKRA
			RMI1	PRKRIP1
			RNF14	PRKRIR
			RNF168	PRMT1
			RNF20	PRMT5
			RNF4	PRPF18
			RNF40	PRPF19
			RNF8	PRPF3
			RNGTT	PRPF31
			RNMT	PRPF38A
			RNPC3	PRPF38B
			RNPS1	PRPF4
			ROMO1	PRPF40A
			RPA1	PRPF6
			RPA2	PRPF8
			RPA3	PRRC2A
			RPAIN	PRUNE
			RPAP1	PSAT1
			RPAP2	PSMA1
			RPAP3	PSMA2
			RPE	PSMA3
			RPF1	PSMA4
			RPF2	PSMA5
			RPL10A	PSMA6
			RPL11	PSMA7
			RPL12	PSMB1
			RPL13	PSMB2
			RPL14	PSMB3
			RPL15	PSMB4
			RPL17	PSMB5
			RPL18	PSMB6
			RPL18A	PSMB7
			RPL19	PSMC1
			RPL23	PSMC2
			RPL23A	PSMC3
			RPL24	PSMC4
			RPL26	PSMC5
			RPL27	PSMC6
			RPL27A	PSMD1
			RPL28	PSMD11
			RPL29	PSMD12
			RPL3	PSMD13
			RPL30	PSMD14
			RPL31	PSMD2
			RPL32	PSMD3
			RPL34	PSMD4
			RPL35	PSMD6
			RPL36	PSMD7
			RPL36AL	PSMD8
			RPL37	PSME1
			RPL37A	PSMG1
			RPL38	PSMG2
			RPL4	PSMG3
			RPL41	PSMG4
			RPL5	PSTK
			RPL6	PTBP1
			RPL7	PTCD3
			RPL7A	PTK2
			RPL7L1	PTMA
			RPL8	PTPMT1
			RPL9	PTPN23
			RPLP0	PUF60
			RPLP1	PWP1
			RPLP2	PWP2
			RPN1	PYROXD1
			RPN2	QARS
			RPP14	RAB6A
			RPP21	RABGGTA
			RPP30	RABGGTB
			RPP40	RAC1
			RPS11	RAC3
			RPS12	RACGAP1
			RPS13	RAD17
			RPS14	RAD21
			RPS15	RAD51
			RPS15A	RAD51C
			RPS16	RAD51D
			RPS17	RAD9A
			RPS18	RAE1
			RPS19	RAN
			RPS19BP1	RANBP2
			RPS2	RANGAP1
			RPS20	RARS
			RPS21	RARS2
			RPS23	RBBP4
			RPS24	RBBP5
			RPS25	RBBP6
			RPS27	RBBP8
			RPS27A	RBM14
			RPS28	RBM17
			RPS29	RBM19
			RPS3	RBM22
			RPS3A	RBM25
			RPS5	RBM28
			RPS6	RBM39
			RPS7	RBM4
			RPS8	RBM42
			RPS9	RBM48
			RPSA	RBM8A
			RPTOR	RBMX
			RQCD1	RBMXL1
			RRM1	RBX1
			RRM2	RCC1
			RRN3	RCL1
			RRP1	RCOR1
			RRP12	REV3L
			RRP15	REXO2
			RRP7A	RFC2
			RRP9	RFC3
			RRS1	RFC4
			RSL1D1	RFC5
			RSL24D1	RFK
			RSRC2	RFT1
			RTCB	RGPD6
			RTF1	RHEB
			RTFDC1	RHOQ
			RTTN	RIC1
			RUVBL1	RILPL2
			RUVBL2	RINT1
			SACM1L	RIOK1
			SAE1	RIOK2
			SAP130	RMI1
			SAP18	RNF113A
			SAP30BP	RNF139
			SARNP	RNF14
			SARS	RNF168
			SARS2	RNF20
			SART1	RNF4
			SART3	RNF40
			SASS6	RNF8
			SBDS	RNGTT
			SBNO1	RNMT
			SCAP	RNPC3
			SCFD1	RNPS1
			SCGB1C1	ROMO1
			SDAD1	RPA1
			SDC1	RPA2
			SDE2	RPA3
			SDHAF2	RPAIN
			SDHC	RPAP1
			SDHD	RPAP2
			SEC13	RPAP3
			SEC16A	RPE
			SEC61A1	RPF1
			SEC61B	RPF2
			SEC61G	RPL10
			SEC62	RPL10A
			SEC63	RPL11
			SEH1L	RPL12
			SENP6	RPL13
			SEPHS2	RPL13A
			SERBP1	RPL14
			SETD1A	RPL15
			SETD2	RPL17
			SETDB1	RPL18
			SF1	RPL18A
			SF3A1	RPL19
			SF3A2	RPL21
			SF3A3	RPL22
			SF3B1	RPL23
			SF3B2	RPL23A
			SF3B3	RPL24
			SF3B4	RPL26
			SF3B5	RPL27
			SF3B6	RPL27A
			SFPQ	RPL28
			SFSWAP	RPL29
			SGOL1	RPL3
			SGPP1	RPL30
			SHFM1	RPL31
			SHQ1	RPL32
			SIGLEC14	RPL34
			SIN3A	RPL35
			SKA1	RPL35A
			SKA3	RPL36
			SKIV2L2	RPL36A
			SKP1	RPL36AL
			SKP2	RPL37
			SLBP	RPL37A
			SLC25A10	RPL38
			SLC25A26	RPL4
			SLC25A3	RPL41
			SLC35B1	RPL5
			SLC39A7	RPL6
			SLC4A5	RPL7
			SLC7A5	RPL7A
			SLC7A6OS	RPL7L1
			SLC9B1	RPL8
			SLMO2	RPL9
			SLU7	RPLP0
			SMARCB1	RPLP1
			SMARCE1	RPLP2
			SMC2	RPN1
			SMC3	RPN2
			SMC4	RPP14
			SMC5	RPP21
			SMG1	RPP30
			SMG5	RPP38
			SMG6	RPP40
			SMN2	RPS11
			SMNDC1	RPS12
			SMU1	RPS13
			SNAPC1	RPS14
			SNAPC2	RPS15
			SNAPC3	RPS15A
			SNAPC4	RPS16
			SNAPC5	RPS17
			SNF8	RPS18
			SNIP1	RPS19
			SNRNP200	RPS19BP1
			SNRNP25	RPS2
			SNRNP27	RPS20
			SNRNP35	RPS21
			SNRNP40	RPS23
			SNRNP48	RPS24
			SNRNP70	RPS25
			SNRPA1	RPS26
			SNRPB	RPS27
			SNRPC	RPS27A
			SNRPD1	RPS28
			SNRPD2	RPS29
			SNRPD3	RPS3
			SNRPE	RPS3A
			SNRPF	RPS4X
			SNRPG	RPS5
			SNUPN	RPS6
			SNW1	RPS7
			SOD1	RPS8
			SOD2	RPS9
			SON	RPSA
			SP2	RPTOR
			SPATA31A6	RQCD1
			SPATA5	RRM1
			SPATA5L1	RRM2
			SPC24	RRM2B
			SPC25	RRN3
			SPCS2	RRP1
			SPCS3	RRP12
			SPDL1	RRP15
			SPRTN	RRP7A
			SPTLC1	RRP9
			SPTSSA	RRS1
			SRBD1	RSL1D1
			SRCAP	RSL24D1
			SRF	RSRC2
			SRFBP1	RTCB
			SRP14	RTF1
			SRP19	RTFDC1
			SRP54	RTTN
			SRP68	RUVBL1
			SRP72	RUVBL2
			SRP9	SACM1L
			SRPR	SAE1
			SRPRB	SAMM50
			SRRM1	SAP130
			SRRM2	SAP18
			SRRT	SAP30BP
			SRSF1	SARNP
			SRSF10	SARS
			SRSF11	SARS2
			SRSF2	SART1
			SRSF3	SART3
			SRSF6	SASS6
			SRSF7	SBDS
			SS18L2	SBNO1
			SSBP3	SCAP
			SSRP1	SCFD1
			SSU72	SCGB1C1
			STARD7	SDAD1
			STAT5A	SDC1
			STIL	SDE2
			STRAP	SDHAF2
			STRIP1	SDHC
			STX18	SDHD
			STX5	SEC13
			SUGP1	SEC16A
			SUGT1	SEC61A1
			SUMO2	SEC61B
			SUPT16H	SEC61G
			SUPT4H1	SEC62
			SUPT5H	SEC63
			SUPT6H	SEH1L
			SUPV3L1	SENP6
			SURF6	SEPHS2
			SYF2	SERBP1
			SYMPK	SETD1A
			SYS1	SETD2
			TACC3	SETDB1
			TADA2A	SF1
			TADA3	SF3A1
			TAF10	SF3A2
			TAF1B	SF3A3
			TAF1C	SF3B1
			TAF1D	SF3B14
			TAF2	SF3B2
			TAF5	SF3B3
			TAF6	SF3B4
			TAF7	SF3B5
			TAF8	SF3B6
			TAMM41	SFPQ
			TANGO6	SFSWAP
			TARDBP	SGOL1
			TARS	SGPP1
			TARS2	SHFM1
			TBC1D3B	SHQ1
			TBC1D3C	SIGLEC14
			TBC1D3H	SIN3A
			TBCA	SKA1
			TBCB	SKA3
			TBCC	SKIV2L2
			TBCD	SKP1
			TBCE	SKP2
			TBL3	SLBP
			TBP	SLC25A10
			TCEB2	SLC25A26
			TCEB3CL	SLC25A3
			TCERG1	SLC25A43
			TCOF1	SLC35B1
			TCP1	SLC39A7
			TDGF1	SLC4A5
			TELO2	SLC7A5
			TEN1	SLC7A6OS
			TERF1	SLC9B1
			TERF2	SLMO2
			TEX10	SLU7
			TFAM	SMARCB1
			TFB2M	SMARCE1
			TFDP1	SMC1A
			TFIP11	SMC2
			TFRC	SMC3
			TGS1	SMC4
			THAP1	SMC5
			THAP11	SMG1
			THG1L	SMG5
			THOC1	SMG6
			THOC3	SMN2
			THOC5	SMNDC1
			THOC6	SMU1
			THOC7	SNAPC1
			TICRR	SNAPC2
			TIMELESS	SNAPC3
			TIMM10	SNAPC4
			TIMM13	SNAPC5
			TIMM22	SNF8
			TIMM23	SNIP1
			TIMM44	SNRNP200
			TIMM9	SNRNP25
			TINF2	SNRNP27
			TIPIN	SNRNP35
			TLN1	SNRNP40
			TM7SF2	SNRNP48
			TMA16	SNRNP70
			TMED2	SNRPA1
			TMEM127	SNRPB
			TMEM199	SNRPC
			TMEM240	SNRPD1
			TMEM258	SNRPD2
			TMSB10	SNRPD3
			TNNT2	SNRPE
			TNPO3	SNRPF
			TOE1	SNRPG
			TOMM20	SNUPN
			TOMM22	SNW1
			TOMM40	SOD1
			TONSL	SOD2
			TOP1	SON
			TOP2A	SP2
			TOP3A	SPATA31A6
			TOPBP1	SPATA5
			TOR2A	SPATA5L1
			TP53RK	SPC24
			TPI1	SPC25
			TPR	SPCS2
			TPT1	SPCS3
			TPX2	SPDL1
			TRA2B	SPRTN
			TRAIP	SPTLC1
			TRAPPC1	SPTSSA
			TRAPPC11	SRBD1
			TRAPPC3	SRCAP
			TRAPPC4	SRF
			TRAPPC5	SRFBP1
			TRAPPC8	SRP14
			TREML2	SRP19
			TRIAP1	SRP54
			TRIM49C	SRP68
			TRMT112	SRP72
			TRMT5	SRP9
			TRNP1	SRPR
			TRNT1	SRPRB
			TRRAP	SRRM1
			TSEN2	SRRM2
			TSEN34	SRRT
			TSEN54	SRSF1
			TSFM	SRSF10
			TSG101	SRSF11
			TSPYL5	SRSF2
			TSR1	SRSF3
			TTC1	SRSF6
			TTC27	SRSF7
			TTC4	SS18L2
			TTF2	SSBP3
			TTI1	SSR1
			TTI2	SSRP1
			TTK	SSU72
			TUBA1B	STARD7
			TUBA1C	STAT5A
			TUBB	STIL
			TUBB8	STRAP
			TUBE1	STRIP1
			TUBG1	STRN
			TUBGCP2	STX18
			TUBGCP3	STX5
			TUBGCP4	SUGP1
			TUBGCP5	SUGT1
			TUBGCP6	SUMO2
			TUT1	SUPT16H
			TVP23C	SUPT4H1
			TWF1	SUPT5H
			TWISTNB	SUPT6H
			TXN	SUPV3L1
			TXNL4A	SURF6
			TXNL4B	SYF2
			U2AF1	SYMPK
			U2AF2	SYS1
			U2SURP	TACC3
			UBA2	TADA2A
			UBA3	TADA3
			UBA5	TAF10
			UBAP1	TAF1B
			UBC	TAF1C
			UBE2D3	TAF1D
			UBE2I	TAF2
			UBE2L3	TAF5
			UBE2M	TAF6
			UBE2N	TAF7
			UBL5	TAF8
			UBQLN4	TAMM41
			UBR4	TANGO6
			UBR5	TARDBP
			UBTF	TARS
			UFD1L	TARS2
			UFL1	TBC1D25
			UFM1	TBC1D3B
			UNC45A	TBC1D3C
			UNC50	TBC1D3F
			UPF1	TBC1D3H
			UPF2	TBCA
			UPF3A	TBCB
			UQCC2	TBCC
			UQCRB	TBCD
			UQCRC2	TBCE
			UQCRFS1	TBL3
			UQCRH	TBP
			UQCRQ	TCEB1
			URB1	TCEB2
			URB2	TCEB3CL
			URI1	TCERG1
			URM1	TCOF1
			UROD	TCP1
			USF2	TDGF1
			USP10	TDRD3
			USP17L5	TELO2
			USP36	TEN1
			USP37	TERF1
			USP5	TERF2
			USP7	TEX10
			USP8	TFAM
			USPL1	TFB2M
			UTP11L	TFDP1
			UTP15	TFIP11
			UTP18	TFRC
			UTP20	TGS1
			UTP23	THAP1
			UTP3	THAP11
			VARS	THG1L
			VARS2	THOC1
			VCP	THOC2
			VHL	THOC3
			VMP1	THOC5
			VPS13D	THOC6
			VPS18	THOC7
			VPS25	THOP1
			VPS28	TICRR
			VPS33A	TIMELESS
			VPS35	TIMM10
			VPS41	TIMM13
			VPS51	TIMM22
			VPS72	TIMM23
			VWA9	TIMM44
			WARS	TIMM9
			WBP1	TINF2
			WBP11	TIPIN
			WBSCR16	TLN1
			WBSCR22	TM7SF2
			WDHD1	TMA16
			WDR1	TMED2
			WDR12	TMEM127
			WDR18	TMEM199
			WDR24	TMEM240
			WDR25	TMEM258
			WDR26	TMSB10
			WDR3	TNNT2
			WDR33	TNPO3
			WDR43	TOE1
			WDR46	TOMM20
			WDR5	TOMM22
			WDR55	TOMM40
			WDR61	TONSL
			WDR7	TOP1
			WDR70	TOP2A
			WDR74	TOP3A
			WDR75	TOPBP1
			WDR77	TOR2A
			WDR82	TP53RK
			WDR92	TPI1
			WEE1	TPR
			WIBG	TPT1
			WNK1	TPX2
			WTAP	TRA2B
			XAB2	TRAIP
			XPO1	TRAPPC1
			XPO5	TRAPPC11
			XRCC1	TRAPPC2
			XRCC3	TRAPPC3
			XRCC5	TRAPPC4
			XRCC6	TRAPPC5
			XRN2	TRAPPC8
			YAE1D1	TREML2
			YARS	TRIAP1
			YARS2	TRIM49C
			YBX1	TRMT112
			YEATS2	TRMT5
			YEATS4	TRNAU1AP
			YKT6	TRNP1
			YPEL1	TRNT1
			YPEL5	TRRAP
			YRDC	TSEN2
			YTHDC1	TSEN34
			YY1	TSEN54
			ZBTB11	TSFM
			ZBTB17	TSG101
			ZC3H18	TSPYL5
			ZC3H8	TSR1
			ZCCHC9	TSR2
			ZCRB1	TSTA3
			ZFC3H1	TTC1
			ZFP69B	TTC27
			ZMAT2	TTC4
			ZMAT5	TTF2
			ZNF131	TTI1
			ZNF133	TTI2
			ZNF207	TTK
			ZNF253	TUBA1B
			ZNF284	TUBA1C
			ZNF317	TUBB
			ZNF335	TUBB8
			ZNF407	TUBE1
			ZNF468	TUBG1
			ZNF492	TUBGCP2
			ZNF559	TUBGCP3
			ZNF574	TUBGCP4
			ZNF676	TUBGCP5
			ZNF687	TUBGCP6
			ZNF720	TUFM
			ZNF763	TUT1
			ZNF830	TVP23C
			ZNHIT2	TWF1
			ZNHIT3	TWISTNB
			ZNHIT6	TXN
			ZNRD1	TXNL4A
			ZPR1	TXNL4B
			ZRANB2	U2AF1
			ZW10	U2AF2
				U2SURP
				UBA1
				UBA2
				UBA3
				UBA5
				UBA52
				UBAP1
				UBB
				UBC
				UBE2D3
				UBE2I
				UBE2L3
				UBE2M
				UBE2N
				UBL4A
				UBL5
				UBQLN4
				UBR4
				UBR5
				UBTF
				UFD1L
				UFL1
				UFM1
				UNC45A
				UNC50
				UPF1
				UPF2
				UPF3A
				UQCC2
				UQCRB
				UQCRC1
				UQCRC2
				UQCRFS1
				UQCRH
				UQCRQ
				URB1
				URB2
				URI1
				URM1
				UROD
				USF2
				USP10
				USP17L5
				USP36
				USP37
				USP39
				USP5
				USP7
				USP8
				USPL1
				UTP11L
				UTP15
				UTP18
				UTP20
				UTP23
				UTP3
				UXT
				VARS
				VARS2
				VCP
				VHL
				VMP1
				VPS13D
				VPS18
				VPS25
				VPS28
				VPS33A
				VPS35
				VPS41
				VPS51
				VPS72
				VTA1
				VWA9
				WARS
				WBP1
				WBP11
				WBSCR16
				WBSCR22
				WDHD1
				WDR1
				WDR12
				WDR18
				WDR24
				WDR25
				WDR26
				WDR3
				WDR33
				WDR43
				WDR46
				WDR5
				WDR55
				WDR60
				WDR61
				WDR7
				WDR70
				WDR74
				WDR75
				WDR77
				WDR82
				WDR92
				WEE1
				WIBG
				WNK1
				WTAP
				XAB2
				XIAP
				XPO1
				XPO5
				XRCC1
				XRCC3
				XRCC5
				XRCC6
				XRN2
				YAE1D1
				YARS
				YARS2
				YBX1
				YEATS2
				YEATS4
				YKT6
				YPEL1
				YPEL5
				YRDC
				YTHDC1
				YY1
				ZBTB11
				ZBTB17
				ZBTB48
				ZBTB8OS
				ZC3H13
				ZC3H18
				ZC3H8
				ZCCHC9
				ZCRB1
				ZFC3H1
				ZFP69B
				ZFR
				ZMAT2
				ZMAT5
				ZNF131
				ZNF133
				ZNF160
				ZNF207
				ZNF253
				ZNF259
				ZNF284
				ZNF317
				ZNF335
				ZNF407
				ZNF468
				ZNF492
				ZNF559
				ZNF574
				ZNF676
				ZNF687
				ZNF720
				ZNF763
				ZNF830
				ZNHIT2
				ZNHIT3
				ZNHIT6
				ZNRD1
				ZPR1
				ZRANB2
				ZW10
