# Supplementary material for: Genome-wide CRISPR screens of oral squamous cell carcinoma reveal fitness genes in the Hippo pathway
Source: eLife. 2020 Sep 29;9:e57761. doi: 10.7554/eLife.57761 (PMC7591259; doi:10.7554/eLife.57761)
Supplement: Supplementary file 3. — (A) KEGG pathway analysis results for all 2539 essential genes identified from CRISPR screen of 21 OSCC cell lines. (B) KEGG pathway analysis results for 918 essential genes after filtering out core fitness genes. [file elife-57761-supp3.xlsx]

## Sheet: Supplementary file 3A
Supplementary file 3A - KEGG pathway analysis results for all 2539 essential genes identified from CRISPR screen of 21 OSCC cell lines
p-value	q-value	pathway	source	external_id	members_input_overlap	members_input_overlap_geneids	size	effective_size
2.25396e-62	5.88282e-60	Spliceosome - Homo sapiens (human)	KEGG	path:hsa03040	NCBP1; NCBP2; HSPA8; PRPF8; PUF60; DHX16; SRSF10; DHX15; PRPF3; PRPF4; PRPF6; SNRNP200; DDX39B; PRPF31; CCDC12; MAGOH; DHX8; ACIN1; USP39; CHERP; THOC3; THOC2; THOC1; SNRPD3; SNRPD2; SNRPD1; PPIL1; DDX42; PQBP1; DDX46; DDX5; SNRNP27; SYF2; DHX38; SRSF7; SRSF6; SRSF1; SRSF3; SRSF2; U2AF1; U2AF2; SRSF9; EFTUD2; SF3A1; SF3A2; SF3A3; ALYREF; SART1; SNRPB2; XAB2; RBM25; RBM22; BUD31; PHF5A; EIF4A3; TC…	26121; 51729; 4116; 10262; 494115; 10285; 10286; 9775; 10291; 9785; 11325; 4670; 11338; 4686; 24148; 23658; 3183; 56949; 3190; 1655; 3192; 10772; 27258; 1659; 9343; 1665; 55660; 7307; 51340; 10946; 58517; 9879; 10907; 8683; 51362; 10915; 27316; 57461; 8896; 9410; 9416; 27339; 25804; 10450; 5356; 7919; 3312; 9984; 8449; 11017; 22916; 6426; 10523; 6428; 6431; 6432; 6434; 22827; 23350; 10569; 55119;…	134	134
3.29912e-49	4.30536e-47	RNA transport - Homo sapiens (human)	KEGG	path:hsa03013	NCBP1; NCBP2; EIF3I; EIF3J; DDX39B; RAN; EIF3A; EIF3B; EIF3C; EIF1AX; EIF1AY; EIF3F; STRAP; SAP18; NUP214; RPP30; EIF3CL; NUP98; ACIN1; NUP93; RANGAP1; PRMT5; TPR; THOC3; THOC2; THOC1; THOC7; THOC6; THOC5; EIF4G2; EIF4G1; POP1; POP7; POP5; POP4; NUP205; NUP88; POM121C; SEH1L; PABPC1; NUP85; POM121; GEMIN5; EIF5B; XPOT; XPO1; NMD3; CLNS1A; NXF1; RPP21; SEC13; ALYREF; RPP25L; EIF4E; EIF4B; UBE2I; N…	7175; 10248; 81929; 10762; 4116; 10775; 79897; 79902; 10284; 3646; 4686; 23636; 51808; 8664; 80145; 8892; 60528; 728689; 10250; 53371; 23165; 100101267; 9883; 7329; 57510; 51367; 10921; 79023; 54960; 10419; 1207; 8890; 8891; 10940; 8893; 8894; 10460; 79228; 11260; 23279; 10482; 9972; 3837; 9470; 8661; 9984; 22794; 8663; 5901; 5903; 5905; 8665; 9775; 8480; 57122; 5411; 8487; 8668; 10556; 10557; 49…	171	171
8.88995e-41	7.73426e-39	Ribosome - Homo sapiens (human)	KEGG	path:hsa03010	RPL22; MRPL36; MRPL34; MRPL32; MRPS7; MRPS6; MRPS5; MRPS2; RPL14; RPL15; RPL17; RPL11; RPL13; RPL18; RPL19; UBA52; MRPL24; MRPL27; RPL37A; MRPL21; MRPL20; MRPL23; MRPL22; RPL6; RPL7; RPL27A; RPS27A; MRPL28; RPL7A; MRPL10; MRPL11; MRPL14; MRPL16; MRPL17; MRPL19; MRPL4; MRPL9; RPL8; MRPS21; RPLP2; RPLP1; RPLP0; RPL18A; RPL35A; RPS15A; RPS7; RPS6; RPS5; RPS3; RPS2; RPS9; RPS8; RPS15; RPL13A; RPL4; R…	6146; 6147; 6150; 6152; 6154; 6156; 6157; 6158; 6155; 6161; 6164; 6165; 6168; 6169; 6173; 6175; 6176; 6181; 6183; 6187; 6188; 6191; 6193; 6194; 6201; 6202; 6203; 6205; 6206; 6207; 51264; 6209; 6210; 124995; 6208; 6217; 6222; 6223; 6224; 6227; 6228; 6229; 6230; 6233; 6234; 6235; 6160; 4736; 9349; 7311; 2197; 54948; 54460; 79590; 55052; 25873; 219927; 10573; 51023; 3921; 9045; 65003; 55168; 51073; …	153	153
5.61076e-26	3.66102e-24	Ribosome biogenesis in eukaryotes - Homo sapiens (human)	KEGG	path:hsa03008	MDN1; UTP6; RPP38; IMP3; RPP30; RRP7A; EIF6; REXO1; NOP10; REXO2; NHP2; MPHOSPH10; TCOF1; GNL3; GNL2; BMS1; NMD3; GNL3L; RAN; RPP25L; NOP56; NOB1; WDR36; UTP15; NAT10; DROSHA; UTP18; GAR1; XPO1; WDR3; NXF1; IMP4; HEATR1; SBDS; SPATA5; DKC1; RCL1; UTP14A; LSG1; TBL3; PWP2; NOL6; POP5; CSNK2A1; NOP58; RIOK2; RIOK1; WDR43; GTPBP4; FCF1; AK6; POP1; NXT1; POP7; XRN1; XRN2; POP4; NVL; WDR75; CSNK2B; RB…	55813; 10248; 10775; 2091; 55341; 23560; 29107; 65083; 10813; 9790; 102157402; 3692; 57455; 23160; 10885; 23195; 84128; 54433; 84135; 92856; 10940; 5822; 29889; 1736; 27341; 55505; 26354; 5901; 22803; 83732; 54552; 134430; 10528; 6949; 54464; 28987; 10556; 10557; 4931; 55127; 7514; 55131; 55651; 10607; 51068; 51077; 25996; 51602; 51096; 10482; 29102; 51119; 1457; 1460; 55226; 10171; 10199; 138716…	105	101
3.51282e-25	1.83369e-23	Cell cycle - Homo sapiens (human)	KEGG	path:hsa04110	MAD2L2; PCNA; MAD2L1; CDC25A; CDK1; BUB1B; PLK1; PKMYT1; WEE1; ATR; SKP2; CDC6; CDC7; ZBTB17; SKP1; MAD1L1; SMC3; STAG2; ANAPC11; ANAPC10; TTK; SMAD4; CDK4; ESPL1; HDAC2; PTTG1; MYC; CUL1; CHEK1; SMC1A; ORC5; BUB1; BUB3; RAD21; ORC6; CDC25B; ORC4; CCNA2; ORC3; ORC1; MCM7; MCM6; MCM5; MCM4; MCM3; MCM2; ANAPC1; CDC16; ANAPC2; ANAPC5; ANAPC4; CCNB1; E2F4; E2F3; E2F1; CCND1; CDC26; FZR1; CDC23; CDC20…	4609; 9232; 7709; 545; 9088; 23594; 23595; 8243; 8697; 4171; 4172; 4173; 4175; 4176; 595; 4998; 1111; 8379; 7272; 8317; 8318; 51343; 10393; 64682; 10926; 8881; 29882; 699; 701; 5347; 51433; 29945; 9978; 5885; 8454; 10459; 7465; 51529; 1869; 1871; 1874; 996; 6500; 6502; 7027; 890; 891; 902; 5000; 5001; 5111; 9126; 246184; 4089; 4174; 983; 990; 991; 9184; 993; 994; 9700; 10735; 4085; 1017; 3066; 10…	124	124
5.27298e-20	2.29375e-18	mRNA surveillance pathway - Homo sapiens (human)	KEGG	path:hsa03015	PPP2R1A; NCBP1; NCBP2; PPP2R3C; BCL2L2-PABPN1; PABPN1; UPF1; SSU72; WDR82; UPF2; CPSF6; RNGTT; CPSF4; CPSF3; CPSF2; CPSF1; RNPS1; SMG5; PCF11; SMG7; SMG6; SMG1; ETF1; PELO; SAP18; PABPC1; FIP1L1; MAGOH; RNMT; GSPT1; SYMPK; NXF1; ACIN1; PPP2R2A; ALYREF; CASC3; DDX39B; NUDT21; PPP1CB; PPP1CA; SRRM1; PPP2CA; CSTF1; CSTF3; CSTF2; CLP1; NXT1; WDR33; PNN; PPP2R5E; EIF4A3; PPP2R5C	23049; 10250; 4116; 8731; 8732; 55339; 10284; 9775; 2107; 4686; 10898; 53918; 9887; 10921; 29894; 81608; 53981; 10978; 55012; 7919; 10482; 23293; 22794; 5411; 11051; 11052; 23381; 5976; 26986; 2935; 5499; 5500; 51585; 22916; 5515; 5518; 5520; 5527; 5529; 26019; 100529063; 8106; 29101; 29107; 1477; 1478; 1479; 22985; 10189; 80335; 51692; 8189	91	91
5.09837e-17	1.90097e-15	RNA polymerase - Homo sapiens (human)	KEGG	path:hsa03020	POLR3F; POLR1A; POLR1B; POLR1C; POLR1D; POLR1E; POLR3A; POLR3K; POLR3H; POLR2E; POLR2D; POLR2G; POLR2F; POLR2A; POLR2C; POLR2B; POLR2L; POLR2I; POLR2H; POLR2K; ZNRD1; POLR3D; POLR3E; TWISTNB; POLR3B; POLR3C	221830; 5441; 51082; 51728; 661; 55703; 25885; 55718; 171568; 5430; 5431; 5432; 5433; 5434; 5435; 5436; 9533; 5438; 5440; 84172; 5437; 30834; 64425; 11128; 10621; 10623	31	31
6.02317e-17	1.96506e-15	Aminoacyl-tRNA biosynthesis - Homo sapiens (human)	KEGG	path:hsa00970	SARS2; KARS; VARS; FARS2; DARS; NARS; CARS2; TARS2; RARS2; LARS2; HARS; AARS2; QRSL1; IARS2; PARS2; WARS2; MARS2; VARS2; RARS; YARS; NARS2; EPRS; GATC; IARS; CARS; WARS; TARS; YARS2; SEPSECS; QARS; GARS; LARS; MTFMT; AARS; FARSB; FARSA; DARS2; MARS; PSTK; SARS	79587; 2617; 92935; 51067; 2058; 55699; 16; 57176; 3735; 54938; 6301; 57038; 57505; 3035; 10667; 7453; 4141; 5917; 3376; 80222; 5859; 25973; 51520; 833; 283459; 4677; 8565; 10056; 1615; 118672; 2193; 55278; 7407; 10352; 6897; 79731; 55157; 23395; 51091; 123263	66	66
9.74375e-16	2.82569e-14	Proteasome - Homo sapiens (human)	KEGG	path:hsa03050	PSMD8; PSMD4; PSMD7; PSMD6; PSMD1; PSMD3; PSMD2; PSMA2; PSMA3; PSMA1; PSMA6; PSMA7; PSMA4; PSMA5; PSMC1; PSMC2; PSMC3; PSMC4; PSMC6; POMP; PSMD14; PSMD11; PSMD13; PSMD12; PSMB7; PSMB6; PSMB5; PSMB4; PSMB3; PSMB2; PSMB1	51371; 9861; 5682; 5683; 5684; 5685; 5686; 5687; 5688; 5689; 5690; 5691; 5692; 5693; 5694; 5695; 5700; 5701; 5702; 5704; 5706; 5707; 5708; 5709; 5710; 5713; 5714; 5717; 5718; 5719; 10213	45	45
2.27991e-15	5.95056e-14	DNA replication - Homo sapiens (human)	KEGG	path:hsa03030	POLA2; POLA1; RFC5; RFC4; RFC3; RFC2; POLE; FEN1; POLD1; POLD2; POLD3; PRIM1; LIG1; PCNA; MCM7; MCM6; MCM5; MCM4; MCM3; MCM2; SSBP1; RNASEH2A; RPA1; RPA3; RPA2; POLE3; POLE2	3978; 10535; 5422; 5424; 5425; 5426; 5427; 5557; 2237; 5985; 4175; 4171; 4172; 4173; 4174; 4176; 6742; 10714; 54107; 5982; 5983; 5984; 23649; 6117; 6118; 6119; 5111	36	36
1.17821e-13	2.79556e-12	Pyrimidine metabolism - Homo sapiens (human)	KEGG	path:hsa00240	POLA2; POLA1; PNPT1; POLR3F; POLR1A; POLE; POLR1C; POLR1D; RRM2; RRM1; POLR3A; POLR3K; POLR3H; CAD; CTPS1; DUT; CMPK1; POLD1; POLD2; POLD3; PRIM1; POLE3; POLR1E; POLR3D; UMPS; POLR2E; POLR2D; POLR2G; POLR2F; POLR2A; POLR2C; POLR2B; POLR2L; POLR2I; POLR2H; POLR2K; ZNRD1; DHODH; POLR1B; TYMS; POLR3E; DTYMK; POLE2; TWISTNB; CANT1; POLR3B; POLR3C	51727; 51728; 6241; 171568; 6240; 23649; 30834; 7298; 221830; 87178; 661; 124583; 1723; 7372; 84172; 790; 25885; 1841; 5422; 5424; 5425; 5426; 5427; 5430; 5431; 5432; 5433; 5434; 5435; 5436; 9533; 5438; 5440; 5441; 54107; 5437; 1854; 11128; 10621; 10623; 51082; 55703; 55718; 64425; 5557; 10714; 1503	101	101
5.256e-12	1.14318e-10	Nucleotide excision repair - Homo sapiens (human)	KEGG	path:hsa03420	RAD23A; RFC5; RFC4; ERCC2; ERCC3; ERCC4; RFC3; RFC2; POLE; POLD1; POLD2; POLD3; LIG1; DDB1; PCNA; GTF2H3; GTF2H2; GTF2H1; GTF2H4; GTF2H2C; RPA1; RPA3; RPA2; POLE3; POLE2; CDK7; RBX1; CCNH	902; 3978; 2071; 2072; 728340; 2965; 2966; 2967; 2968; 54107; 5424; 5425; 5426; 5427; 10714; 5982; 5983; 5984; 5985; 6117; 6118; 6119; 1642; 5886; 5111; 2068; 9978; 1022	47	47
7.42524e-12	1.49076e-10	RNA degradation - Homo sapiens (human)	KEGG	path:hsa03018	PABPC1; HSPA9; EXOSC8; EXOSC9; EDC4; EXOSC2; EXOSC3; EXOSC1; EXOSC6; EXOSC7; DHX36; EXOSC5; DCPS; BTG1; HSPD1; SKIV2L; EXOSC4; CNOT3; CNOT2; CNOT1; WDR61; CNOT7; PNPT1; CNOT4; DCP2; LSM4; LSM5; LSM6; LSM7; LSM2; LSM3; ENO1; PAPD5; DIS3; ZCCHC7; DDX6; XRN1; XRN2	3329; 170506; 5393; 22803; 64282; 28960; 4848; 3313; 80349; 694; 27258; 29883; 118460; 87178; 54464; 51690; 51010; 51013; 25804; 11340; 56915; 167227; 84186; 57819; 23644; 6499; 2023; 23016; 26986; 23019; 23404; 22894; 54512; 4849; 4850; 1656; 23658; 11157	79	79
5.82916e-10	1.08672e-08	Basal transcription factors - Homo sapiens (human)	KEGG	path:hsa03022	ERCC2; ERCC3; TAF12; TAF10; GTF2A1; GTF2A2; GTF2E1; GTF2E2; TAF6L; GTF2B; GTF2H3; GTF2H2; GTF2H1; GTF2H4; TAF7; TAF6; TAF4; GTF2F1; TAF2; TAF1; GTF2F2; GTF2H2C; TAF8; CDK7; CCNH	10629; 902; 2967; 2957; 2958; 2959; 2960; 2961; 2962; 2963; 129685; 2966; 6873; 2968; 2068; 6872; 6874; 6878; 6879; 6881; 6883; 2071; 728340; 1022; 2965	45	45
1.02453e-09	1.78268e-08	Ubiquitin mediated proteolysis - Homo sapiens (human)	KEGG	path:hsa04120	FBXW11; BIRC6; HUWE1; TRIM37; UBE2D3; VHL; PPIL2; UBE2L3; CDC16; CDC23; SKP1; PRPF19; ANAPC11; ANAPC10; SYVN1; UBE2G2; DDB1; CUL1; CUL2; CUL3; TRAF6; BIRC2; UBA6; UBA2; UBA3; UBA1; ANAPC1; SKP2; ANAPC2; ANAPC5; ANAPC4; UBR5; UBE2I; UBE2H; UBE2K; UBE2M; SOCS3; UBE2N; CDC27; CDC26; UBE2C; FZR1; UBE2NL; CDC20; KEAP1; SAE1; UBE2Z; RBX1; UBE2S; FBXW7	7189; 9817; 8452; 991; 6500; 57448; 1642; 3093; 51343; 7317; 7323; 7327; 7328; 7329; 7332; 7334; 64682; 8881; 29882; 27338; 27339; 23759; 51433; 65264; 29945; 9978; 7428; 8453; 8454; 389898; 11065; 9021; 10055; 329; 9039; 9040; 10075; 6502; 10393; 10054; 246184; 51529; 55236; 84447; 23291; 996; 51366; 4591; 8697; 55294	137	137
8.75639e-09	1.42839e-07	Viral carcinogenesis - Homo sapiens (human)	KEGG	path:hsa05203	HDAC3; HDAC2; HIST1H4K; NFKBIA; KAT2A; USP7; CDC42; GTF2A1; GTF2A2; CDC20; RHOA; GTF2E1; GTF2E2; SKP2; CHD4; MAD1L1; PIK3CA; JUN; ATP6V0D1; GTF2B; HNRNPK; JAK1; PSMC1; NFKB2; DDB1; RANBP1; PKM; TRAF2; SRF; RAC1; GTF2H3; GTF2H2; GTF2H1; MRPS18B; GTF2H4; HIST1H2BD; HIST1H2BE; HIST1H2BF; HIST1H2BG; CREB1; HIST1H2BB; HIST1H2BC; HIST1H2BL; CCNA2; HIST1H2BN; HIST1H2BH; RELA; HIST1H2BJ; UBR4; DNAJA3; SN…	1111; 7186; 578; 5700; 595; 1108; 2648; 1642; 3716; 8339; 8340; 8341; 8343; 8344; 8345; 8347; 5290; 4791; 4792; 8379; 7874; 5315; 3190; 6722; 5879; 8970; 983; 5902; 728340; 8841; 28973; 2885; 3725; 23352; 5970; 6502; 1385; 890; 387; 9093; 2957; 2958; 2959; 2960; 2961; 2965; 2966; 2967; 2968; 22938; 9114; 8517; 3017; 3018; 23513; 5594; 991; 998; 1021; 1017; 3066; 1019; 8362	201	201
2.77016e-07	4.25302e-06	Oxidative phosphorylation - Homo sapiens (human)	KEGG	path:hsa00190	NDUFA6; ATP6V1F; ATP6V1A; COX5A; NDUFB9; NDUFB8; NDUFB7; NDUFB4; NDUFB3; NDUFB2; SDHC; PPA2; UQCRH; COX6B1; NDUFAB1; NDUFV1; ATP6AP1; PPA1; NDUFA11; NDUFA13; ATP6V1B2; ATP6V0B; ATP6V0C; NDUFC2; NDUFA2; NDUFA3; NDUFA8; NDUFA9; ATP6V1H; COX4I1; COX11; UQCRFS1; ATP6V1D; ATP6V1E1; NDUFS2; ATP6V0D1; NDUFS5; ATP6V1G1; NDUFS7; ATP6V0E1; ATP6V1C1; COX17; UQCRC2; UQCRC1	523; 526; 527; 528; 529; 374291; 533; 537; 9296; 4708; 4695; 4696; 4700; 4702; 4704; 4706; 4709; 4710; 4713; 4714; 4715; 4718; 4720; 4723; 4725; 9377; 51382; 7384; 7385; 7386; 7388; 8992; 1327; 1340; 1353; 9550; 10063; 5464; 27068; 126328; 51079; 51606; 9114; 6391	133	133
8.37531e-07	1.21442e-05	Protein export - Homo sapiens (human)	KEGG	path:hsa03060	SRP54; SRPRB; SPCS2; SPCS3; SRP9; SEC63; SRP68; SEC62; SRP14; SEC61G; SRP19; SRP72; SEC61B; SEC61A1	10952; 7095; 23480; 9789; 6726; 6727; 6728; 6729; 6730; 6731; 60559; 11231; 29927; 58477	23	23
9.92263e-07	1.36306e-05	Huntington disease - Homo sapiens (human)	KEGG	path:hsa05016	HDAC2; UQCRH; NDUFB9; NDUFB8; NDUFB7; NDUFB4; NDUFB3; NDUFB2; SDHC; CLTC; DCTN2; COX6B1; VDAC1; DCTN4; COX5A; NDUFAB1; NDUFV1; SOD2; AP2M1; NDUFA11; NDUFA13; TFAM; SIN3A; NDUFA6; NDUFC2; NDUFA2; NDUFA3; SOD1; CREB1; AP2S1; SLC25A5; NDUFA9; POLR2E; POLR2D; COX4I1; POLR2F; AP2A1; NDUFA8; POLR2C; POLR2B; POLR2L; POLR2I; POLR2H; POLR2K; TAF4; GNAQ; POLR2G; GRIN2B; NDUFS2; NDUFS5; NDUFS7; POLR2A; UQCR…	4696; 374291; 1340; 292; 4695; 4700; 4702; 4704; 4706; 4708; 4709; 4710; 4713; 4714; 4718; 4720; 4725; 1173; 1175; 160; 4723; 1213; 2776; 7385; 6874; 7388; 7384; 1327; 7386; 4899; 10540; 5430; 5431; 5432; 5433; 5434; 5435; 5436; 5437; 5438; 5440; 5441; 25942; 2904; 1385; 7019; 126328; 51079; 4715; 9377; 6391; 6648; 51164; 7416; 6647; 3066	193	193
2.70532e-06	3.53044e-05	Homologous recombination - Homo sapiens (human)	KEGG	path:hsa03440	RBBP8; TOPBP1; BARD1; TOP3A; PALB2; RPA1; RPA3; RPA2; BLM; POLD1; POLD2; POLD3; XRCC2; RAD51; SSBP1; XRCC3; RAD51D; RAD51C; RAD51B	5888; 5889; 5890; 5892; 641; 5932; 5424; 5425; 11073; 580; 6742; 10714; 7516; 7517; 6117; 6118; 6119; 79728; 7156	41	41
3.35253e-06	4.16672e-05	Terpenoid backbone biosynthesis - Homo sapiens (human)	KEGG	path:hsa00900	FDPS; DHDDS; FNTA; FNTB; HMGCS1; IDI1; PMVK; PDSS1; MVD; HMGCR; GGPS1; MVK; NUS1	10654; 2339; 2224; 116150; 79947; 3156; 3157; 23590; 3422; 2342; 9453; 4597; 4598	22	22
4.19755e-06	4.83032e-05	Purine metabolism - Homo sapiens (human)	KEGG	path:hsa00230	POLA2; POLA1; ADSS; PNPT1; POLR3F; POLR1A; POLR1B; POLR1C; POLR1D; RRM2; RRM1; POLR3A; ADSL; POLR3K; POLR3H; PAPSS1; IMPDH2; GUK1; POLD1; POLD2; POLD3; PRIM1; PKM; POLR1E; POLR3D; CANT1; POLR2E; POLR2D; POLR2G; POLR2F; POLR2A; POLR2C; POLR2B; POLR2L; GART; POLR2I; POLR2H; POLR2K; GMPS; POLR3E; ZNRD1; POLE; AK6; PPAT; POLE3; POLE2; TWISTNB; POLR3B; PDE4D; POLR3C	51728; 5144; 3615; 171568; 2618; 23649; 102157402; 6240; 6241; 30834; 8833; 221830; 661; 158; 159; 124583; 5315; 84172; 87178; 25885; 5422; 5424; 5425; 5426; 5427; 5430; 5431; 5432; 5433; 5434; 5435; 5436; 9533; 5438; 5440; 5441; 54107; 5471; 9061; 5437; 11128; 10621; 10623; 51082; 55703; 55718; 64425; 2987; 5557; 10714	174	173
4.2566e-06	4.83032e-05	mTOR signaling pathway - Homo sapiens (human)	KEGG	path:hsa04150	ATP6V1D; ATP6V1F; ATP6V1A; SEH1L; SLC7A5; ATP6V1H; IKBKB; RPS6; MIOS; RICTOR; TSC2; RPTOR; SKP2; PIK3CA; TBC1D7; MAPKAP1; WDR24; MAPK1; ATP6V1B2; FLCN; IGF1R; RRAGA; RRAGC; SEC13; CHUK; MTOR; EIF4E; TELO2; RHOA; MLST8; EIF4B; EIF4E2; SOS1; TTI1; SLC3A2; ATP6V1E1; INS; GRB2; ATP6V1G1; LAMTOR4; PDPK1; ATP6V1C1; RHEB; LAMTOR2; LAMTOR3	81929; 523; 526; 528; 529; 79109; 3630; 6194; 51256; 9296; 7249; 64121; 1147; 5170; 9894; 5290; 57521; 51382; 9675; 54468; 64223; 84219; 6396; 9470; 28956; 2885; 253260; 9550; 6502; 6520; 6009; 387; 51606; 3480; 389541; 2475; 10670; 1975; 1977; 8649; 201163; 8140; 5594; 3551; 6654	151	150
6.51077e-06	6.9134e-05	Oocyte meiosis - Homo sapiens (human)	KEGG	path:hsa04114	MAD2L2; PPP2R1A; FBXW11; PLK1; PKMYT1; MAD2L1; FBXO5; CDC20; CDC16; SKP1; MAD1L1; SMC3; CDC27; ANAPC11; ANAPC10; MAPK1; ESPL1; AURKA; PTTG1; CUL1; SMC1A; IGF1R; BUB1; PPP2R5E; ANAPC1; ANAPC2; ANAPC5; ANAPC4; CCNB1; PPP1CB; PPP1CA; PPP2CA; CDC26; CDC23; INS; CDK1; CDK2; RBX1; PPP2R5C	9232; 3630; 8243; 8379; 6790; 891; 10393; 26271; 64682; 8881; 29882; 699; 5347; 51433; 29945; 9978; 23291; 8454; 983; 10459; 5515; 51529; 9700; 6500; 5499; 5500; 9088; 5527; 5518; 3480; 5529; 9126; 246184; 1017; 5594; 991; 996; 4085; 8697	125	125
6.62203e-06	6.9134e-05	Mismatch repair - Homo sapiens (human)	KEGG	path:hsa03430	PCNA; RFC5; RFC4; RPA1; RFC3; RFC2; POLD1; POLD2; POLD3; LIG1; SSBP1; RPA3; RPA2	3978; 5424; 5425; 6742; 10714; 5982; 5983; 5984; 5985; 6117; 6118; 6119; 5111	23	23
4.22148e-05	0.000423771	Epithelial cell signaling in Helicobacter pylori infection - Homo sapiens (human)	KEGG	path:hsa05120	ATP6V1D; ATP6V1F; ATP6V1A; ATP6AP1; NFKBIA; EGFR; ATP6V1H; IKBKB; IKBKG; JUN; RELA; ATP6V0B; ATP6V0C; CSK; RAC1; CHUK; ATP6V1B2; PTPN11; ATP6V1E1; ATP6V0D1; ATP6V1G1; ATP6V0E1; ATP6V1C1; CDC42	537; 51606; 9296; 523; 3725; 526; 527; 1147; 5781; 9114; 51382; 1956; 1445; 4792; 3551; 8992; 8517; 9550; 5970; 998; 529; 528; 5879; 533	68	68
6.76033e-05	0.000653499	Epstein-Barr virus infection - Homo sapiens (human)	KEGG	path:hsa05169	MYC; PSMD8; PSMD4; PSMD7; NFKBIA; PSMD1; PSMD3; PSMD2; RIPK1; CIR1; MAP2K7; IKBKG; PSMD12; CD44; USP7; PIK3CA; JUN; MAP3K7; ISG15; IKBKB; JAK1; HDAC2; PSMC1; NFKB2; PSMC3; PSMC4; PSMC6; SIN3A; TRAF2; PSMD6; TRAF6; RAC1; FADD; CCNA2; CHUK; MAP2K3; SNW1; SKP2; NFKBIE; PSMC2; TNFAIP3; RELA; E2F3; E2F1; CCND1; PSMD14; PSMD11; PSMD13; BAK1; CDK2; CDK4; CDK6	4609; 7186; 7189; 578; 5700; 5701; 5704; 5706; 5707; 5708; 5714; 595; 5717; 5718; 5719; 1147; 3716; 9861; 3725; 5290; 4791; 4792; 4794; 7874; 8737; 6885; 5879; 8517; 9541; 1869; 5970; 25942; 6502; 890; 8772; 22938; 9636; 5702; 960; 5709; 5710; 1017; 7128; 1871; 3551; 10213; 5606; 5713; 5609; 3066; 1019; 1021	201	200
8.33884e-05	0.000750597	Vibrio cholerae infection - Homo sapiens (human)	KEGG	path:hsa05110	ATP6V0B; ATP6V0C; ATP6V1F; ATP6V1A; ACTB; ATP6V1D; ATP6AP1; ARF1; ATP6V1E1; ATP6V1H; SEC61A1; ATP6V0D1; ATP6V1G1; SEC61G; ATP6V0E1; ATP6V1C1; SEC61B; ATP6V1B2; ACTG1	51606; 523; 526; 527; 528; 529; 533; 537; 9114; 8992; 51382; 23480; 60; 71; 10952; 9550; 9296; 29927; 375	50	50
8.33996e-05	0.000750597	Fanconi anemia pathway - Homo sapiens (human)	KEGG	path:hsa03460	RAD51; WDR48; RPA1; PALB2; ERCC4; TOP3A; RPA3; RPA2; BLM; ATRIP; UBE2T; ATR; RMI2; FANCD2; TELO2; FANCA; RAD51C; RMI1; FANCI; SLX4	2177; 5889; 80010; 2072; 84126; 545; 9894; 55215; 641; 6118; 116028; 5888; 29089; 6117; 6119; 79728; 7156; 84464; 2175; 57599	54	54
0.000104464	0.000908837	Cytosolic DNA-sensing pathway - Homo sapiens (human)	KEGG	path:hsa04623	NFKBIA; POLR3F; POLR3D; POLR1C; POLR3B; IKBKG; POLR3A; POLR3K; POLR3H; RIPK1; ADAR; RELA; CHUK; POLR2E; POLR2F; POLR2L; POLR2H; POLR2K; IKBKB; POLR3E; POLR1D; POLR3C	51082; 51728; 661; 55703; 8517; 8737; 55718; 171568; 4792; 5434; 5435; 5437; 5440; 5441; 5970; 3551; 1147; 103; 9533; 11128; 10621; 10623	63	63
0.000132254	0.0011135	Progesterone-mediated oocyte maturation - Homo sapiens (human)	KEGG	path:hsa04914	MAD2L2; MAD2L1; PLK1; PKMYT1; INS; CCNA2; MAD1L1; PIK3CA; ANAPC11; ANAPC10; HSP90AB1; MAPK1; AURKA; IGF1R; BUB1; CDC25B; CDC25A; ANAPC1; CDC16; ANAPC2; ANAPC5; ANAPC4; CCNB1; CDC27; CDC26; FZR1; CDC23; KIF22; CDK1; CDK2	3630; 8697; 8379; 6790; 51343; 10393; 5290; 8881; 29882; 699; 10459; 5347; 51433; 29945; 3835; 3326; 51529; 996; 64682; 890; 891; 9088; 3480; 246184; 983; 5594; 993; 994; 4085; 1017	99	99
0.000176395	0.00143872	Shigellosis - Homo sapiens (human)	KEGG	path:hsa05131	MAD2L2; FBXW11; ACTG1; CRKL; NFKBIA; IKBKB; IKBKG; CRK; U2AF1; MAPK1; ARPC2; RELA; ITGB1; DIAPH1; RAC1; ARPC3; CD44; CHUK; ARPC4; PFN1; ACTB; CDC42	7307; 8517; 10459; 4792; 3551; 60; 960; 1729; 71; 1399; 5970; 5594; 5216; 998; 3688; 10093; 10094; 1398; 5879; 23291; 1147; 10109	65	65
0.000220186	0.00174147	Human T-cell leukemia virus 1 infection - Homo sapiens (human)	KEGG	path:hsa05166	BCL2L1; MAD2L1; BUB1B; SMAD4; ANAPC11; NFKBIA; KAT2A; IKBKB; ATR; IKBKG; VDAC1; ESPL1; XPO1; GPS2; CDC16; MAD1L1; PIK3CA; EGR1; JUN; ANAPC10; ANAPC4; MAPK1; FOSL1; JAK1; PTTG1; MYC; RANBP1; RANBP3; CHEK1; SRF; BUB3; CREB1; CHUK; TRRAP; SLC25A5; ANAPC1; CCNA2; ANAPC2; ANAPC5; NFKB2; FDPS; RELA; E2F3; E2F1; CCND1; CDC26; CDC23; SLC2A1; CDC20; RAN; CDK2; ELK1; CDK4; CDC27	4609; 9232; 598; 6722; 595; 1111; 2648; 8295; 1147; 3716; 3725; 3551; 10393; 64682; 2224; 8881; 4791; 4792; 29882; 8379; 701; 545; 51433; 7416; 5901; 5902; 292; 8498; 2874; 8517; 51529; 1869; 1871; 5970; 1017; 7514; 1385; 6513; 890; 8061; 1958; 246184; 4089; 2002; 29945; 5594; 991; 9184; 996; 9700; 4085; 8697; 1019; 5290	219	219
0.000677734	0.0052026	N-Glycan biosynthesis - Homo sapiens (human)	KEGG	path:hsa00510	DOLK; RPN1; RPN2; DPAGT1; ALG2; DAD1; ALG1; ALG6; ALG8; DOLPP1; DDOST; DPM3; ALG11; STT3A; ALG13; ALG14; DPM2	1798; 6184; 6185; 1650; 199857; 22845; 1603; 54344; 440138; 79053; 29929; 8818; 57171; 56052; 85365; 3703; 79868	49	49
0.000787799	0.00587473	Chronic myeloid leukemia - Homo sapiens (human)	KEGG	path:hsa05220	BCL2L1; HDAC2; CRKL; SMAD4; NFKBIA; IKBKB; IKBKG; CRK; PIK3CA; MAPK1; MYC; SHC1; CHUK; RELA; E2F3; SOS1; E2F1; CCND1; PTPN11; BAK1; GRB2; CDK4; CDK6	4609; 1871; 1019; 5781; 2885; 5290; 4792; 6464; 578; 8517; 1869; 5970; 595; 598; 4089; 5594; 3551; 1398; 1399; 3066; 1147; 1021; 6654	76	76
0.000907178	0.00657704	Non-alcoholic fatty liver disease (NAFLD) - Homo sapiens (human)	KEGG	path:hsa04932	COX5A; NDUFB9; NDUFB8; NDUFB7; NDUFB4; NDUFB3; NDUFB2; IKBKB; UQCRH; COX6B1; EIF2S1; NDUFAB1; NDUFV1; PIK3CA; JUN; NDUFA11; NDUFA13; RELA; NDUFA6; TRAF2; NDUFA2; NDUFA3; RAC1; NDUFA8; NDUFA9; NDUFC2; COX4I1; SDHC; SOCS3; INS; NDUFS2; SREBF1; NDUFS5; NDUFS7; UQCRFS1; CDC42; UQCRC2; UQCRC1	7186; 374291; 3630; 6720; 4695; 4696; 4700; 4702; 4704; 4706; 4708; 4709; 4710; 4713; 4714; 4715; 4718; 4723; 4725; 3725; 4720; 5290; 7384; 7385; 7386; 7388; 5879; 1327; 1340; 9021; 5970; 126328; 51079; 1965; 9377; 6391; 3551; 998	149	149
0.00120783	0.00852012	Renal cell carcinoma - Homo sapiens (human)	KEGG	path:hsa05211	FLCN; RBX1; CRKL; SOS1; RAC1; PRCC; PIK3CA; PTPN11; JUN; RAP1B; SLC2A1; GAB1; VHL; GRB2; PAK2; CRK; FH; MAPK1; CDC42; CUL2; RAPGEF1	7428; 8453; 5781; 3725; 5908; 6654; 5290; 5879; 201163; 2885; 5062; 2889; 5594; 2271; 998; 6513; 2549; 1398; 1399; 9978; 5546	69	69
0.00175441	0.01205	Herpes simplex infection - Homo sapiens (human)	KEGG	path:hsa05168	SRSF9; NFKBIA; USP7; IKBKB; TAF10; IKBKG; MED8; EIF2S1; DAXX; SRSF7; SRSF6; SRSF1; SRSF3; SRSF2; JUN; MAP3K7; C1QBP; HNRNPK; JAK1; RELA; CUL1; TRAF2; NXF1; TRAF6; FADD; CHUK; ALYREF; POLR2A; SKP2; MCRS1; SRPK1; CSNK2A1; TAF6; TAF4; PPP1CB; TAF6L; SOCS3; PPP1CA; PTPN11; SKP1; CDK1; CDK2; HCFC1; CSNK2B	7186; 7189; 112950; 8772; 6732; 1616; 3190; 1147; 3716; 3725; 5781; 4792; 7874; 708; 10445; 6874; 6878; 6881; 6885; 10482; 8454; 6426; 6427; 6428; 6431; 6432; 5430; 3551; 9021; 8517; 5970; 6500; 6502; 5499; 5500; 10629; 1965; 1457; 1460; 10189; 983; 8683; 3054; 1017	185	185
0.00206085	0.0137919	Selenocompound metabolism - Homo sapiens (human)	KEGG	path:hsa00450	PAPSS1; SEPHS2; SEPHS1; MARS2; SEPSECS; MARS; PSTK; TXNRD1	7296; 118672; 9061; 22929; 4141; 22928; 92935; 51091	17	17
0.00226488	0.014506	Phagosome - Homo sapiens (human)	KEGG	path:hsa04145	ATP6V1D; NCF1; ATP6V1F; ATP6V1A; ACTG1; ATP6V1H; FCGR1A; TUBA3D; TUBA1C; TUBA1B; DYNC1I2; ATP6AP1; TFRC; ATP6V1B2; ATP6V0B; ATP6V0C; RAB7A; ATP6V0E1; ITGB5; RAB5C; RAC1; HGS; ITGB1; DYNC1H1; SEC61G; PIK3C3; SEC61B; ATP6V1C1; TUBB4B; ATP6V1E1; TUBB; ITGAV; ATP6V0D1; ATP6V1G1; STX18; ACTB; SEC61A1	523; 526; 527; 528; 529; 533; 537; 653361; 60; 71; 9296; 3685; 3688; 10376; 10383; 53407; 2209; 5289; 51382; 7879; 10952; 29927; 1778; 1781; 5878; 8992; 113457; 84790; 203068; 3693; 9550; 7037; 51606; 9114; 23480; 9146; 5879	152	151
0.00227872	0.014506	Synaptic vesicle cycle - Homo sapiens (human)	KEGG	path:hsa04721	ATP6V0B; ATP6V0C; AP2S1; ATP6V1F; ATP6V1A; NAPA; ATP6V1D; ATP6V1E1; ATP6V1H; NSF; AP2M1; ATP6V0D1; AP2A1; CLTC; DNM2; ATP6V0E1; ATP6V1B2; ATP6V1G1; ATP6V1C1	526; 527; 528; 529; 1173; 1175; 9114; 160; 4905; 51606; 51382; 1213; 8992; 523; 8775; 9550; 9296; 1785; 533	63	63
0.00303183	0.0188406	Small cell lung cancer - Homo sapiens (human)	KEGG	path:hsa05222	BCL2L1; PTK2; ITGA3; BIRC2; IKBKB; IKBKG; ZBTB17; PIK3CA; MYC; ITGB1; TRAF2; NFKBIA; TRAF6; CHUK; SKP2; RELA; E2F3; E2F1; CCND1; MAX; ITGAV; BAK1; CDK2; CDK4; CDK6	4609; 7186; 7189; 7709; 4149; 578; 595; 598; 3675; 3685; 3688; 5747; 1147; 5290; 4792; 329; 1869; 1871; 5970; 6502; 8517; 3551; 1017; 1019; 1021	93	93
0.00321571	0.0195186	Sulfur relay system - Homo sapiens (human)	KEGG	path:hsa04122	MOCS3; CTU2; URM1; CTU1; NFS1	81605; 27304; 90353; 348180; 9054	8	8
0.00374465	0.0222126	Pancreatic cancer - Homo sapiens (human)	KEGG	path:hsa05212	ERBB2; BCL2L1; E2F3; CDK6; E2F1; RAC1; SMAD4; PIK3CA; EGFR; CHUK; BAK1; IKBKB; CCND1; MAPK1; MTOR; IKBKG; RAD51; JAK1; CDK4; RELA; CDC42	5888; 1871; 2475; 3716; 1956; 2064; 5290; 4089; 578; 8517; 1869; 5970; 595; 598; 5594; 3551; 1019; 998; 5879; 1147; 1021	75	75
0.00501386	0.0290804	Collecting duct acid secretion - Homo sapiens (human)	KEGG	path:hsa04966	ATP6V0C; ATP6V1F; ATP6V1A; ATP6V1D; ATP6V1E1; ATP6V1C1; ATP6V1G1; ATP6V0E1; ATP6V1B2; ATP6V0D1	523; 526; 527; 528; 529; 9114; 8992; 51382; 9550; 9296	27	27
0.00580769	0.0329523	Thermogenesis - Homo sapiens (human)	KEGG	path:hsa04714	COX5A; NDUFB9; NDUFB8; NDUFB7; NDUFB4; NDUFB3; NDUFB2; MAP2K3; RPS6; NDUFAF7; SMARCE1; UQCRH; COX6B1; TSC2; ACTG1; NDUFAB1; NDUFV1; SMARCB1; COX20; NDUFA11; NDUFA13; NDUFS5; NDUFA6; RPTOR; NDUFC2; NDUFA2; NDUFA3; COA5; NDUFA8; NDUFA9; COX4I1; MTOR; CREB1; SMARCD1; MLST8; SDHC; FGFR1; RHEB; UQCRFS1; SOS1; ACSL3; NDUFS2; GRB2; ACTL6A; NDUFS7; COX11; ACTB; COX17; UQCRC2; UQCRC1	116228; 9377; 374291; 55471; 6194; 60; 71; 86; 4695; 4696; 4700; 4702; 4704; 4706; 4723; 4709; 4710; 4714; 4718; 4725; 4713; 4715; 2181; 4720; 57521; 2260; 7384; 7385; 64223; 6391; 7388; 1327; 1340; 2885; 1353; 10063; 1385; 126328; 6009; 51079; 4708; 2475; 6598; 6602; 6605; 7386; 5606; 7249; 493753; 6654	229	229
0.00822266	0.045662	Base excision repair - Homo sapiens (human)	KEGG	path:hsa03410	PCNA; POLE; POLD1; POLD2; POLD3; POLE3; LIG1; LIG3; XRCC1; FEN1; POLE2	3978; 3980; 54107; 5424; 5425; 5426; 5427; 2237; 10714; 7515; 5111	33	33
0.00884834	0.04785	Parkinson disease - Homo sapiens (human)	KEGG	path:hsa05012	COX5A; NDUFB9; NDUFB8; NDUFB7; NDUFB4; NDUFB3; NDUFB2; UBE2L3; UQCRH; COX6B1; VDAC1; NDUFAB1; NDUFV1; UBE2G2; NDUFA13; NDUFA11; NDUFA6; NDUFC2; NDUFA2; NDUFA3; NDUFA8; NDUFA9; COX4I1; SLC25A5; UBA1; SDHC; NDUFS2; NDUFS5; UBB; NDUFS7; UQCRFS1; UQCRC2; UQCRC1	374291; 4695; 4696; 4700; 4702; 4704; 4706; 4708; 4709; 4710; 4713; 4714; 4715; 4718; 4720; 4723; 4725; 7314; 7317; 7327; 9377; 7332; 7384; 7385; 7386; 7388; 6391; 292; 1327; 1340; 126328; 51079; 7416	142	142
0.00898334	0.04785	Thyroid hormone signaling pathway - Homo sapiens (human)	KEGG	path:hsa04919	HDAC3; HDAC2; ACTG1; ATP2A2; MED24; MED27; MED1; ITGAV; MED4; TSC2; NCOR1; PIK3CA; MED12; MAPK1; MED14; MED16; MED17; MYC; SIN3A; MED30; MTOR; KAT2A; CCND1; SLC2A1; ATP1A1; PDPK1; ACTB; RHEB	4609; 5170; 71; 7249; 595; 2648; 3685; 9862; 8841; 5290; 9440; 9442; 9968; 90390; 10025; 25942; 5469; 60; 6513; 6009; 9611; 9282; 29079; 2475; 5594; 476; 488; 3066	116	116
0.0105113	0.0537402	Protein processing in endoplasmic reticulum - Homo sapiens (human)	KEGG	path:hsa04141	RPN1; RPN2; RAD23A; HSPA8; UBE2D3; SEC62; SEC63; DDOST; MAP2K7; SEC61G; NPLOC4; PREB; DAD1; PLAA; SEC31A; SYVN1; SKP1; NFE2L2; HSP90AB1; DNAJB11; NSFL1C; CUL1; UBE2G2; TRAF2; SEC13; VCP; SAR1A; STT3A; SEC61B; EIF2S1; BCAP31; DNAJA1; MBTPS1; BAK1; RBX1; SEL1L; SEC61A1	51726; 7186; 6184; 6185; 578; 1603; 8720; 1650; 3703; 5886; 6500; 7323; 9373; 55968; 4780; 10952; 3301; 29927; 3312; 7415; 9978; 6396; 3326; 6400; 8454; 11231; 22872; 56681; 55666; 10113; 7327; 10134; 1965; 7095; 23480; 84447; 5609	165	165
0.0107727	0.0537402	Autophagy - animal - Homo sapiens (human)	KEGG	path:hsa04140	BCL2L1; VMP1; IGF1R; IGBP1; RB1CC1; TSC2; RPTOR; MLST8; TRAF6; PIK3CA; UVRAG; MAP3K7; GABARAP; CFLAR; PIK3R4; ATG9A; MTMR4; EIF2S1; RAB7A; RRAGA; RRAGC; AMBRA1; MTOR; PIK3C3; BNIP3; PPP2CA; INS; MAPK1; PDPK1; RHEB	7189; 3630; 5170; 11337; 7879; 7249; 598; 9821; 64121; 30849; 664; 5289; 5290; 57521; 79065; 64223; 6885; 7405; 81671; 8837; 55626; 6009; 5515; 3476; 9110; 3480; 2475; 1965; 10670; 5594	128	128
0.0109017	0.0537402	Cellular senescence - Homo sapiens (human)	KEGG	path:hsa04218	FBXW11; RAD9A; MAP2K3; FOXM1; RAD1; VDAC1; MYBL2; TSC2; CCNA2; PIK3CA; MAPK1; MYC; TRPM7; LIN37; CHEK1; CDC25A; ZFP36L1; SLC25A5; MTOR; PPP1CB; RELA; CCNB1; E2F4; E2F3; E2F1; PPP1CA; CCND1; RBBP4; CDK1; CDK2; CDK4; CDK6; HUS1; ATR; RHEB; LIN52	4609; 2305; 54822; 5883; 7249; 595; 1111; 91750; 55957; 677; 5290; 5810; 545; 292; 891; 7416; 23291; 3364; 5928; 1869; 1871; 1874; 6009; 890; 5499; 5500; 2475; 983; 5594; 993; 5606; 5970; 1021; 1017; 1019; 4605	160	160
0.0109128	0.0537402	Prostate cancer - Homo sapiens (human)	KEGG	path:hsa05215	NFKBIA; EGFR; IGF1R; IKBKB; IKBKG; PIK3CA; HSP90AB1; MAPK1; RELA; ERBB2; TCF7; PDGFD; CHUK; CREB1; MTOR; FGFR1; E2F3; SOS1; E2F1; CCND1; INS; CDK2; GRB2; PDPK1	2064; 3630; 5170; 595; 1147; 4792; 2260; 3326; 6932; 2885; 1869; 1871; 5970; 1385; 3480; 8517; 1956; 2475; 80310; 5594; 3551; 1017; 5290; 6654	97	97
0.0149272	0.0721482	Bacterial invasion of epithelial cells - Homo sapiens (human)	KEGG	path:hsa05100	MAD2L2; ITGB1; PTK2; SHC1; CRKL; RAC1; ARPC3; ARPC2; GAB1; ILK; ARPC4; PIK3CA; CLTC; DNM2; CRK; RHOA; CDC42; ACTB; ACTG1	387; 5747; 10109; 3611; 60; 1213; 10459; 6464; 71; 1399; 998; 10093; 10094; 3688; 2549; 1398; 5879; 1785; 5290	74	74
0.0167656	0.0795602	Legionellosis - Homo sapiens (human)	KEGG	path:hsa05134	HSF1; HSPA8; BCL2L13; RAB1A; EEF1G; ARF1; NFKBIA; NAIP; VCP; HSPD1; EEF1A1; SAR1A; NFKB2; RELA; BNIP3	3329; 1937; 664; 4791; 56681; 375; 4792; 3297; 5861; 23786; 5970; 3312; 7415; 4671; 1915	55	55
0.0192136	0.0895489	Endocytosis - Homo sapiens (human)	KEGG	path:hsa04144	TSG101; CAPZB; CHMP4B; HSPA8; EGFR; IGF1R; IST1; CHMP2A; ARRB2; CLTC; DNM2; CHMP3; HGS; CHMP7; CHMP6; CHMP5; VPS45; AP2S1; RAB5C; VPS25; ARF1; VPS37A; AP2M1; TFRC; RNF103-CHMP3; RAB10; CHMP1A; RAB7A; STAMBP; VPS28; TRAF6; ARPC3; ARPC2; RAB35; ARPC4; LDLR; AP2A1; VPS4A; VPS4B; CHMP1B; RHOA; USP8; VPS35; PIP5K1A; PDCD6IP; UBB; CDC42; GBF1; FOLR1; SNF8	11267; 7189; 8729; 100526767; 27183; 9798; 7251; 27243; 91782; 10890; 10093; 7314; 1173; 1175; 51652; 160; 1213; 7879; 8394; 10015; 7037; 3312; 1785; 11311; 2348; 11021; 137492; 79643; 57132; 9525; 832; 51510; 84313; 128866; 3949; 10094; 375; 10109; 10617; 387; 9101; 3480; 409; 1956; 55737; 9146; 5878; 51160; 998; 5119	244	244
0.0240353	0.110056	Human papillomavirus infection - Homo sapiens (human)	KEGG	path:hsa05165	ATP6V1D; HDAC3; PTK2; ATP6V1A; PPP2R1A; PPP2R3C; ITGA3; EGFR; ATP6V1H; IKBKB; ATP6V1F; ATR; IKBKG; TSC2; SCRIB; CCNA2; CHD4; AXIN1; PTGER4; PIK3CA; ATP6AP1; ATP6V0D1; GRB2; ISG15; SOS1; FADD; MTOR; PSMC1; ATP6V1B2; JAG1; HDAC2; MAPK1; PKM; ATP6V0B; ATP6V0C; TCF7; ITGB5; CDK6; JAK1; PPP2R2A; CHUK; CREB1; ITGB1; PPP2R5E; CDC42; VWF; UBR4; BCAP31; RELA; CSNK1A1; E2F1; CCND1; ATP6V1E1; ITGAV; BAK1; T…	523; 526; 527; 528; 529; 533; 545; 578; 8772; 51382; 7249; 595; 1108; 3675; 3685; 5734; 3688; 3693; 5747; 8312; 1147; 8841; 3551; 537; 9636; 5290; 7283; 5315; 55012; 10474; 27175; 6932; 7450; 8992; 5529; 1869; 23352; 5970; 5518; 182; 1385; 5700; 6009; 890; 1956; 10134; 5515; 5520; 5527; 9114; 8517; 2475; 1452; 51606; 2885; 9550; 23513; 5594; 9296; 998; 3716; 1017; 3066; 1019; 1021; 6654	339	339
0.035085	0.155207	Mitophagy - animal - Homo sapiens (human)	KEGG	path:hsa04137	USP8; BCL2L1; RAB7A; BCL2L13; E2F1; AMBRA1; JUN; GABARAP; MFN2; FIS1; UBB; ATG9A; RELA; CSNK2B; CSNK2A1; BNIP3	3725; 7314; 664; 7879; 1457; 1460; 1869; 9927; 11337; 55626; 9101; 51024; 5970; 598; 79065; 23786	65	65
0.035085	0.155207	Central carbon metabolism in cancer - Homo sapiens (human)	KEGG	path:hsa05230	ERBB2; SLC7A5; HK2; PIK3CA; G6PD; EGFR; SLC2A1; PGAM4; MAPK1; MTOR; SCO2; PGAM1; MYC; FGFR1; LDHA; PKM	4609; 9997; 2064; 3099; 1956; 2475; 5223; 5315; 3939; 2260; 5594; 441531; 2539; 8140; 6513; 5290	65	65
0.0360553	0.156841	Pathogenic Escherichia coli infection - Homo sapiens (human)	KEGG	path:hsa05130	ITGB1; TUBA3D; ARPC3; TUBA1B; ARPC2; TUBB; ARPC4; TUBA1C; NCL; TUBB4B; RHOA; CDC42; ACTB; ACTG1	10093; 10376; 10383; 387; 10094; 113457; 84790; 203068; 71; 60; 4691; 998; 3688; 10109	55	55
0.0418962	0.179261	AMPK signaling pathway - Homo sapiens (human)	KEGG	path:hsa04152	PPP2R1A; ELAVL1; PPP2R3C; TSC2; RPTOR; CCNA2; SCD; MAP3K7; FASN; RAB10; IGF1R; ACACA; PPP2R2A; CREB1; MTOR; HMGCR; PPP2R5E; CCND1; INS; PPP2CA; SREBF1; PIK3CA; PDPK1; RHEB; EEF2; PPP2R5C	6319; 31; 57521; 3630; 5170; 6720; 3480; 7249; 595; 3156; 5527; 2194; 5290; 6009; 55012; 6885; 10890; 1385; 890; 5515; 5518; 5520; 1938; 5529; 2475; 1994	120	120
0.0448583	0.188839	Alzheimer disease - Homo sapiens (human)	KEGG	path:hsa05010	HSD17B10; COX5A; NDUFB9; NDUFB8; NDUFB7; NDUFB4; NDUFB3; NDUFB2; UQCRH; COX6B1; NDUFAB1; NDUFV1; ATP2A2; MAPK1; NDUFA11; FADD; NAE1; NDUFA6; NDUFC2; NDUFA2; NDUFA3; NDUFA13; NDUFA8; GAPDH; COX4I1; NDUFA9; SDHC; GNAQ; GRIN2B; NDUFS2; NDUFS5; NDUFS7; UQCRFS1; UQCRC2; UQCRC1	2904; 374291; 2597; 8772; 4708; 4695; 4696; 4700; 4702; 4704; 4706; 4709; 4710; 4713; 4714; 4715; 4718; 4720; 4723; 4725; 9377; 8883; 7384; 7385; 7386; 7388; 1327; 1340; 126328; 51079; 2776; 6391; 3028; 5594; 488	171	171
0.045585	0.188852	Systemic lupus erythematosus - Homo sapiens (human)	KEGG	path:hsa05322	HIST1H2AK; HIST1H4K; HIST1H2AM; HIST1H2AL; FCGR1A; HIST1H2AJ; HIST1H2AC; HIST2H2AA3; HIST1H2BD; HIST1H2BE; HIST1H2BF; HIST2H3D; SNRPB; HIST1H3G; HIST1H2BB; HIST1H2BC; HIST1H2BL; HIST1H2BN; HIST1H2BH; HIST1H2BJ; SNRPD3; SNRPD1; H2AFZ; GRIN2B; HIST1H2BG; HIST2H3C; HIST3H3; SSB	6741; 8290; 8330; 8331; 8332; 8334; 8336; 8337; 8339; 8340; 8341; 8343; 8344; 8345; 8347; 8355; 8362; 8970; 653604; 2209; 2904; 3015; 3017; 3018; 6628; 6632; 6634; 126961	133	132
0.0477161	0.194592	Autophagy - other - Homo sapiens (human)	KEGG	path:hsa04136	RPTOR; IGBP1; MLST8; PPP2CA; GABARAP; PIK3R4; MTOR; ATG9A; PIK3C3	30849; 5515; 3476; 5289; 2475; 57521; 11337; 79065; 64223	32	32
0.0499143	0.200425	HIF-1 signaling pathway - Homo sapiens (human)	KEGG	path:hsa04066	EGFR; GAPDH; VHL; TFRC; PIK3CA; EIF4E; MAPK1; RELA; LDHA; CUL2; PGK1; ERBB2; IGF1R; HK2; ENO1; MTOR; ALDOA; EIF4E2; RPS6; SLC2A1; INS; RBX1	2064; 3099; 2597; 3630; 6194; 5230; 5290; 226; 9978; 7428; 8453; 5970; 3939; 6513; 7037; 3480; 1956; 2475; 1977; 5594; 2023; 9470	100	100

## Sheet: Supplementary file 3B
Supplementary file 3B - KEGG pathway analysis results for 918 essential genes after filtering out core fitness genes
p-value	q-value	-log10 Q	pathway	source	external_id	members_input_overlap	members_input_overlap_geneids	size	effective_size
9.14747e-09	2.21369e-06	5.65488	Chronic myeloid leukemia - Homo sapiens (human)	KEGG	path:hsa05220	SOS1; HDAC2; E2F3; SHC1; E2F1; SMAD4; PIK3CA; PTPN11; NFKBIA; CHUK; BAK1; IKBKB; MAPK1; CDK4; IKBKG; CRKL; CDK6; CRK; RELA	1871; 1019; 5781; 5290; 4792; 6464; 578; 8517; 1869; 5970; 4089; 5594; 3551; 1398; 1399; 3066; 1147; 1021; 6654	76	76
2.38218e-07	2.88244e-05	4.54024	TNF signaling pathway - Homo sapiens (human)	KEGG	path:hsa04668	TNFAIP3; TRAF2; NFKBIA; SOCS3; PIK3CA; JUNB; JUN; CHUK; CREB1; MAP3K7; RIPK1; CFLAR; MAP2K3; MAPK1; MAP2K7; IKBKG; IKBKB; FADD; BIRC2; RELA; JAG1	7186; 8737; 8772; 182; 1385; 1147; 8837; 3725; 3726; 5290; 4792; 6885; 9021; 8517; 5970; 329; 7128; 5594; 3551; 5606; 5609	110	110
2.29575e-06	0.000185191	3.73238	Renal cell carcinoma - Homo sapiens (human)	KEGG	path:hsa05211	FLCN; CRKL; SOS1; PRCC; PIK3CA; PTPN11; JUN; RAP1B; SLC2A1; GAB1; MAPK1; RAPGEF1; FH; CRK; PAK2	5781; 3725; 5908; 6654; 5290; 201163; 5062; 2889; 5594; 2271; 6513; 2549; 1398; 1399; 5546	69	69
5.59235e-06	0.000237705	3.62396	Shigellosis - Homo sapiens (human)	KEGG	path:hsa05131	ITGB1; FBXW11; ACTG1; CRKL; CD44; NFKBIA; CHUK; IKBKB; MAPK1; IKBKG; ARPC2; CRK; RELA; DIAPH1	8517; 4792; 3551; 960; 1729; 71; 1399; 5970; 5594; 3688; 1398; 23291; 1147; 10109	65	65
6.16341e-06	0.000237705	3.62396	Small cell lung cancer - Homo sapiens (human)	KEGG	path:hsa05222	ITGB1; TRAF2; NFKBIA; E2F3; E2F1; TRAF6; PIK3CA; ITGA3; CHUK; ITGAV; BAK1; IKBKB; CDK4; IKBKG; CDK6; BIRC2; RELA	7186; 7189; 578; 3675; 3685; 3688; 1147; 5290; 4792; 329; 1869; 1871; 5970; 8517; 3551; 1019; 1021	93	93
6.35039e-06	0.000237705	3.62396	Hepatitis C - Homo sapiens (human)	KEGG	path:hsa05160	NFKBIA; EGFR; IKBKB; IKBKG; PIK3CA; CFLAR; MAPK1; SOS1; JAK1; RELA; TRAF2; TRAF6; FADD; PPP2R2A; CHUK; LDLR; RIPK1; E2F3; E2F1; SOCS3; BAK1; CDK4; CDK6	7186; 7189; 8737; 578; 8772; 1147; 3716; 8837; 5290; 4792; 9021; 8517; 1869; 5970; 3949; 5520; 1956; 1871; 5594; 3551; 1019; 1021; 6654	155	155
6.87577e-06	0.000237705	3.62396	Pancreatic cancer - Homo sapiens (human)	KEGG	path:hsa05212	ERBB2; E2F3; E2F1; SMAD4; PIK3CA; EGFR; CHUK; BAK1; IKBKB; MAPK1; CDK4; IKBKG; CDK6; JAK1; RELA	1871; 3716; 1956; 2064; 5290; 4089; 578; 8517; 1869; 5970; 5594; 3551; 1019; 1147; 1021	75	75
8.49147e-06	0.000256867	3.59029	Apoptosis - Homo sapiens (human)	KEGG	path:hsa04210	DAXX; TRAF2; ACTG1; ENDOG; PIK3CA; NFKBIA; JUN; CHUK; BAK1; RIPK1; CFLAR; MAPK1; MCL1; IKBKB; FADD; BIRC2; RELA; AIFM1; IKBKG; LMNA; TUBA3D	7186; 578; 8772; 71; 4170; 1616; 1147; 8837; 5290; 4792; 8737; 113457; 3551; 329; 3725; 5970; 2021; 8517; 4000; 9131; 5594	136	136
1.02544e-05	0.000268219	3.57151	Osteoclast differentiation - Homo sapiens (human)	KEGG	path:hsa04380	RELA; TRAF2; NFKBIA; SOCS3; TRAF6; PIK3CA; JUNB; JUN; NCF1; CREB1; CHUK; IKBKB; MAPK1; FOSL1; IKBKG; FCGR1A; JAK1; MAP2K7; NFKB2; MAP3K7	7186; 7189; 653361; 4791; 1147; 3716; 3725; 3726; 2209; 5290; 4792; 6885; 3551; 9021; 8517; 5970; 1385; 8061; 5594; 5609	128	127
1.10834e-05	0.000268219	3.57151	Prostate cancer - Homo sapiens (human)	KEGG	path:hsa05215	ERBB2; IKBKB; IGF1R; E2F3; SOS1; E2F1; PIK3CA; NFKBIA; EGFR; CHUK; CREB1; INS; HSP90AB1; MAPK1; IKBKG; RELA; FGFR1	2064; 3630; 1147; 4792; 2260; 3326; 1869; 1871; 5970; 1385; 3480; 8517; 1956; 5594; 3551; 5290; 6654	97	97
1.86461e-05	0.000410214	3.38699	Epstein-Barr virus infection - Homo sapiens (human)	KEGG	path:hsa05169	CIR1; NFKBIA; IKBKB; HDAC2; MAP2K7; IKBKG; PIK3CA; JUN; MAP3K7; ISG15; FADD; RELA; TRAF2; TRAF6; CD44; JAK1; CHUK; MAP2K3; NFKB2; RIPK1; E2F3; E2F1; TNFAIP3; BAK1; CDK4; CDK6	7186; 7189; 578; 1147; 3716; 3725; 5290; 4791; 4792; 8737; 6885; 8517; 9541; 1869; 5970; 8772; 9636; 960; 7128; 1871; 3551; 5606; 5609; 3066; 1019; 1021	201	200
2.04657e-05	0.000412726	3.38434	Human cytomegalovirus infection - Homo sapiens (human)	KEGG	path:hsa05163	CRKL; NFKBIA; EGFR; RIPK1; IKBKG; CRK; TSC2; PTGER4; PIK3CA; MAPK1; SOS1; JAK1; RELA; TRAF2; FADD; CHUK; CREB1; RHOA; IKBKB; E2F3; GNAQ; E2F1; ITGAV; BAK1; ELK1; CDK4; CDK6; GNA11	7186; 8737; 1399; 578; 8772; 7249; 3685; 5734; 1147; 3716; 5290; 4792; 1398; 2776; 2767; 1871; 5970; 1385; 387; 1019; 8517; 1956; 1869; 2002; 5594; 3551; 1021; 6654	225	225
2.43587e-05	0.000421058	3.37566	NOD-like receptor signaling pathway - Homo sapiens (human)	KEGG	path:hsa04621	NFKBIA; BIRC2; RIPK1; IKBKG; VDAC1; RNF31; JUN; MAP3K7; GABARAP; HSP90AB1; MAPK1; JAK1; RELA; TRPM7; TRAF2; TRAF6; FADD; NAIP; CHUK; RHOA; IKBKB; TNFAIP3; MFN2	7186; 7189; 8737; 54822; 8772; 11337; 1147; 3716; 3725; 4792; 9927; 6885; 7416; 3326; 55072; 3551; 8517; 329; 5970; 387; 7128; 5594; 4671	168	168
2.43587e-05	0.000421058	3.37566	Hepatocellular carcinoma - Homo sapiens (human)	KEGG	path:hsa05225	PHF10; ACTG1; SMAD4; EGFR; GAB1; AXIN1; PIK3CA; MAPK1; TXNRD1; IGF1R; SHC1; ARID2; SMARCD1; BRD7; E2F3; SOS1; E2F1; BAK1; KEAP1; ELK1; CDK4; CDK6; NFE2L2	9817; 578; 71; 8312; 7296; 5290; 4780; 6602; 6464; 1869; 1871; 3480; 1956; 196528; 29117; 2549; 2002; 5594; 55274; 4089; 1019; 1021; 6654	168	168
3.0445e-05	0.00049118	3.30876	Amino sugar and nucleotide sugar metabolism - Homo sapiens (human)	KEGG	path:hsa00520	CYB5R4; GNPNAT1; GPI; HK2; UAP1; PGM3; GALE; PMM2; GFPT1; MPI; UGP2	2821; 6675; 2582; 3099; 64841; 7360; 51167; 2673; 5238; 4351; 5373	48	48
3.38485e-05	0.000511959	3.29077	Human T-cell leukemia virus 1 infection - Homo sapiens (human)	KEGG	path:hsa05166	SMAD4; NFKBIA; KAT2A; IKBKB; IKBKG; VDAC1; GPS2; MAD1L1; PIK3CA; EGR1; JUN; MAPK1; FOSL1; JAK1; PTTG1; RELA; RANBP1; RANBP3; CHUK; CREB1; SLC25A5; NFKB2; E2F3; E2F1; SLC2A1; ELK1; CDK4	9232; 2648; 1147; 3716; 3725; 3551; 4791; 4792; 8379; 7416; 5902; 292; 8498; 2874; 8517; 1869; 1871; 5970; 1385; 6513; 8061; 1958; 4089; 2002; 5594; 1019; 5290	219	219
4.79416e-05	0.000657513	3.1821	Focal adhesion - Homo sapiens (human)	KEGG	path:hsa04510	ITGB1; ACTG1; CRKL; ITGA3; EGFR; ILK; RAPGEF1; CRK; SHC1; PIK3CA; JUN; MAPK1; PARVA; ERBB2; IGF1R; ITGB5; DIAPH1; RAP1B; RHOA; SOS1; ITGAV; ELK1; BIRC2; VWF; PAK2	1398; 2064; 3611; 3675; 3685; 3688; 3693; 5908; 3725; 5290; 1729; 329; 7450; 6464; 1399; 387; 3480; 1956; 71; 2889; 55742; 5062; 2002; 5594; 6654	199	199
4.89059e-05	0.000657513	3.1821	Neurotrophin signaling pathway - Homo sapiens (human)	KEGG	path:hsa04722	SOS1; NTF3; SHC1; TRAF6; PIK3CA; PTPN11; NFKBIA; JUN; RAP1B; CRKL; IKBKB; MAPK1; MAP2K7; RAPGEF1; CRK; RELA; GAB1; RHOA	7189; 3725; 5781; 5290; 4792; 5908; 4908; 3551; 6464; 2889; 5970; 1398; 1399; 387; 5594; 5609; 2549; 6654	119	119
6.35433e-05	0.000809341	3.09187	RIG-I-like receptor signaling pathway - Homo sapiens (human)	KEGG	path:hsa04622	IKBKB; TRAF2; TRAF6; TRIM25; OTUD5; NFKBIA; CHUK; MAP3K7; RIPK1; ISG15; IKBKG; FADD; RELA	7186; 7189; 7706; 8737; 9636; 4792; 8772; 8517; 5970; 3551; 1147; 6885; 55593	70	70
8.47796e-05	0.00102583	2.98892	MAPK signaling pathway - Homo sapiens (human)	KEGG	path:hsa04010	IGF1R; CRKL; HSPA8; EGFR; RAP1B; IKBKB; ARRB2; IKBKG; CRK; DAXX; JUN; MAP3K7; MAPK1; NFKB2; ERBB2; ERBB3; TRAF2; NTF3; TRAF6; CDC25B; EFNA3; CHUK; ECSIT; DUSP10; FGFR1; MAP2K3; RELA; SOS1; INS; ELK1; MAP2K7; PAK2	409; 1398; 2064; 2065; 3630; 4791; 1616; 11221; 51295; 7189; 3725; 2260; 1147; 3312; 7186; 5908; 994; 4908; 3551; 1399; 5970; 6885; 5606; 5609; 3480; 1944; 1956; 5062; 8517; 2002; 5594; 6654	295	295
9.74986e-05	0.00111255	2.95368	IL-17 signaling pathway - Homo sapiens (human)	KEGG	path:hsa04657	IKBKB; TRAF2; ELAVL1; TRAF6; NFKBIA; JUN; CHUK; TNFAIP3; MAP3K7; HSP90AB1; MAPK1; FOSL1; IKBKG; FADD; RELA	7186; 8772; 1147; 7189; 3725; 4792; 6885; 3326; 3551; 8517; 5970; 8061; 1994; 7128; 5594	93	93
0.000101141	0.00111255	2.95368	Cellular senescence - Homo sapiens (human)	KEGG	path:hsa04218	RELA; FBXW11; E2F3; CDK6; E2F1; CDC25A; PIK3CA; LIN37; ZFP36L1; SLC25A5; CDK4; MAP2K3; E2F4; FOXM1; RAD1; HUS1; MAPK1; VDAC1; TRPM7; TSC2; LIN52	2305; 54822; 7249; 91750; 55957; 677; 5290; 5810; 292; 7416; 23291; 3364; 1869; 1871; 1874; 5594; 993; 5606; 5970; 1021; 1019	160	160
0.000110475	0.00116239	2.93465	NF-kappa B signaling pathway - Homo sapiens (human)	KEGG	path:hsa04064	IKBKB; TRAF2; TRAF6; TRIM25; NFKBIA; CHUK; TNFAIP3; MAP3K7; RIPK1; CFLAR; IKBKG; BIRC2; NFKB2; RELA; CSNK2A1	7186; 7189; 7706; 8737; 4791; 1147; 8837; 4792; 6885; 1457; 8517; 329; 5970; 7128; 3551	95	94
0.000128275	0.0012209	2.91332	Mitophagy - animal - Homo sapiens (human)	KEGG	path:hsa04137	RAB7A; BCL2L13; E2F1; AMBRA1; JUN; GABARAP; MFN2; FIS1; ATG9A; RELA; CSNK2A1; BNIP3	3725; 664; 7879; 1457; 1869; 9927; 11337; 55626; 51024; 5970; 79065; 23786	65	65
0.000128825	0.0012209	2.91332	Autophagy - animal - Homo sapiens (human)	KEGG	path:hsa04140	RAB7A; MTMR4; IGF1R; RRAGC; TRAF6; PIK3CA; AMBRA1; UVRAG; MAP3K7; GABARAP; CFLAR; RRAGA; MAPK1; ATG9A; RB1CC1; INS; TSC2; BNIP3	7189; 3630; 11337; 7879; 7249; 9821; 64121; 664; 5290; 79065; 6885; 7405; 8837; 55626; 9110; 3480; 10670; 5594	128	128
0.000131171	0.0012209	2.91332	ErbB signaling pathway - Homo sapiens (human)	KEGG	path:hsa04012	ERBB2; ERBB3; SHC1; CRKL; ELK1; JUN; EGFR; GAB1; MAPK1; MAP2K7; SOS1; PIK3CA; CRK; PAK2	3725; 2064; 2065; 1956; 5290; 6464; 5062; 5594; 5609; 2002; 2549; 1398; 1399; 6654	85	85
0.000237075	0.00212489	2.67266	Human papillomavirus infection - Homo sapiens (human)	KEGG	path:hsa05165	HDAC2; ITGA3; EGFR; IKBKB; IKBKG; TSC2; AXIN1; PTGER4; PIK3CA; ATP6AP1; MAPK1; ISG15; FADD; RELA; JAG1; ITGB1; ITGB5; JAK1; PPP2R2A; CHUK; CREB1; PPP2R5E; BCAP31; SOS1; E2F1; ITGAV; BAK1; SCRIB; TUBG2; CDK4; CDK6; ATP6V0E1; VWF; PPP2R5C	578; 8772; 7249; 3675; 3685; 5734; 3688; 3693; 8312; 1147; 3551; 537; 9636; 5290; 27175; 7450; 8992; 5529; 1869; 5970; 182; 1385; 1956; 10134; 5520; 5527; 8517; 23513; 5594; 3716; 3066; 1019; 1021; 6654	339	339
0.00030637	0.00259452	2.58594	Ubiquitin mediated proteolysis - Homo sapiens (human)	KEGG	path:hsa04120	UBE2H; UBE2K; FBXW11; SOCS3; TRAF6; SYVN1; TRIM37; UBE2C; FZR1; UBE2NL; BIRC2; UBA6; KEAP1; UBE2Z; UBE2G2; UBE2S; FBXW7; CUL3	7189; 9817; 8452; 3093; 51343; 7327; 7328; 27338; 65264; 389898; 11065; 9021; 329; 55236; 84447; 23291; 4591; 55294	137	137
0.000310913	0.00259452	2.58594	Non-alcoholic fatty liver disease (NAFLD) - Homo sapiens (human)	KEGG	path:hsa04932	IKBKB; TRAF2; NDUFA3; NDUFB9; SOCS3; NDUFB7; JUN; NDUFV1; NDUFB3; NDUFB2; NDUFA8; INS; NDUFC2; NDUFS2; SREBF1; PIK3CA; NDUFS7; RELA; NDUFA9	7186; 374291; 3630; 6720; 4696; 4702; 4704; 4708; 4709; 4713; 4715; 4718; 4723; 3725; 4720; 5290; 9021; 5970; 3551	149	149
0.000336828	0.00271708	2.5659	Necroptosis - Homo sapiens (human)	KEGG	path:hsa04217	HSP90AB1; TRAF2; AIFM1; VPS4B; RNF103-CHMP3; FADD; BIRC2; SLC25A5; RIPK1; CFLAR; TNFAIP3; VPS4A; HIST1H2AK; JAK1; CHMP3; CHMP1B; VDAC1; TRPM7; HIST1H2AC; RNF31	7186; 8737; 54822; 27183; 8772; 3716; 8837; 8330; 100526767; 7416; 3326; 55072; 292; 57132; 9525; 8334; 9131; 329; 51652; 7128	162	162
0.000451138	0.00352179	2.45324	Fanconi anemia pathway - Homo sapiens (human)	KEGG	path:hsa03460	SLX4; WDR48; PALB2; ERCC4; BLM; FANCA; FANCI; FANCD2; UBE2T; RMI2	2177; 2072; 55215; 641; 116028; 29089; 79728; 84464; 2175; 57599	54	54
0.00049789	0.00368973	2.433	Pathways in cancer - Homo sapiens (human)	KEGG	path:hsa05200	ITGB1; HDAC2; IGF1R; CRKL; SMAD4; E2F1; NFKBIA; EGFR; BIRC2; IKBKB; IKBKG; FH; CRK; AXIN1; PTGER4; NFE2L2; JUN; HSP90AB1; MAPK1; ITGAV; FADD; NFKB2; JAG1; TXNRD1; ERBB2; TRAF2; ITGA3; TRAF6; JAK1; CHUK; CCDC6; PIK3CA; E2F3; RHOA; RELA; FGFR1; ESR2; GNAQ; SOS1; SLC2A1; BAK1; KEAP1; ELK1; CDK4; CDK6; GNA11	2064; 2100; 8312; 6513; 182; 1398; 2260; 2271; 2776; 8517; 329; 387; 6654; 578; 8772; 4780; 4791; 4792; 2767; 3066; 1019; 1021; 7186; 7189; 1147; 7296; 5290; 1399; 3480; 5594; 3551; 3326; 9817; 3675; 3685; 5734; 3688; 3716; 3725; 1869; 1871; 5970; 8030; 1956; 2002; 4089	526	526
0.000503146	0.00368973	2.433	Endocytosis - Homo sapiens (human)	KEGG	path:hsa04144	STAMBP; EGFR; IGF1R; IST1; ARRB2; CHMP3; VPS45; RAB35; RAB5C; ARF1; VPS37A; RNF103-CHMP3; RAB10; RAB7A; HSPA8; TRAF6; ARPC2; LDLR; AP2A1; VPS4A; VPS4B; CHMP1B; RHOA; PIP5K1A; PDCD6IP; FOLR1	7189; 100526767; 27183; 9798; 10890; 51652; 160; 7879; 8394; 10015; 3312; 11311; 2348; 11021; 137492; 57132; 9525; 3949; 375; 10109; 10617; 387; 3480; 409; 1956; 5878	244	244
0.000525806	0.0037425	2.42684	Legionellosis - Homo sapiens (human)	KEGG	path:hsa05134	HSPA8; BCL2L13; RAB1A; ARF1; NFKBIA; NAIP; SAR1A; NFKB2; RELA; BNIP3	664; 4791; 56681; 375; 4792; 5861; 23786; 5970; 3312; 4671	55	55
0.000565127	0.00390745	2.40811	Hepatitis B - Homo sapiens (human)	KEGG	path:hsa05161	NFKBIA; E2F3; E2F1; SMAD4; ATP6AP1; FADD; JUN; CHUK; CREB1; IKBKB; ELK1; CDK4; PIK3CA; CDK6; JAK1; MAPK1; RELA; IKBKG	537; 8772; 1147; 1385; 3716; 3725; 5290; 4792; 8517; 1869; 1871; 5970; 2002; 5594; 3551; 4089; 1019; 1021	144	144
0.000723806	0.00486559	2.31286	Breast cancer - Homo sapiens (human)	KEGG	path:hsa05224	ERBB2; IGF1R; ESR2; SHC1; AXIN1; CDK4; PIK3CA; JUN; BAK1; E2F1; MAPK1; EGFR; SOS1; CDK6; E2F3; NFKB2; JAG1; FGFR1	2064; 2100; 578; 8312; 3725; 5290; 182; 4791; 2260; 6464; 1869; 1871; 3480; 1956; 5594; 1019; 1021; 6654	147	147
0.000791429	0.00505037	2.29668	Epithelial cell signaling in Helicobacter pylori infection - Homo sapiens (human)	KEGG	path:hsa05120	CSK; ATP6AP1; PTPN11; NFKBIA; JUN; CHUK; IKBKB; IKBKG; ATP6V0E1; EGFR; RELA	537; 3725; 1147; 5781; 1956; 1445; 4792; 3551; 8992; 8517; 5970	68	68
0.000811432	0.00505037	2.29668	Human immunodeficiency virus 1 infection - Homo sapiens (human)	KEGG	path:hsa05170	FBXW11; CRKL; NFKBIA; IKBKB; MAP2K7; IKBKG; AP1S2; CRK; PIK3CA; JUN; MAP3K7; MAPK1; FADD; RELA; TRAF2; TRAF6; CHUK; MAP2K3; RIPK1; GNAQ; BAK1; GNA11; PAK2	7186; 7189; 8737; 578; 8772; 1147; 3725; 5290; 4792; 8905; 2767; 6885; 23291; 2776; 8517; 5970; 1398; 1399; 5062; 5594; 3551; 5606; 5609	212	212
0.000813903	0.00505037	2.29668	T cell receptor signaling pathway - Homo sapiens (human)	KEGG	path:hsa04660	SOS1; PIK3CA; NFKBIA; JUN; CHUK; MAP3K7; IKBKB; MAPK1; MAP2K7; IKBKG; CDK4; RELA; RHOA; PAK2	1147; 3725; 5290; 4792; 6885; 8517; 5970; 387; 5062; 5594; 3551; 5609; 1019; 6654	101	101
0.000865449	0.00523596	2.281	Insulin signaling pathway - Homo sapiens (human)	KEGG	path:hsa04910	SOS1; EIF4E2; ACACA; SHC1; SOCS3; HK2; PIK3CA; INS; IKBKB; SREBF1; FASN; RAPGEF1; CRK; MAPK1; CRKL; TSC2; ELK1	3099; 31; 3630; 6720; 7249; 2194; 5290; 9470; 3551; 9021; 6464; 5594; 2889; 1398; 1399; 2002; 6654	137	137
0.000898762	0.00530489	2.27532	Chagas disease (American trypanosomiasis) - Homo sapiens (human)	KEGG	path:hsa05142	IKBKB; GNAQ; TRAF6; PIK3CA; NFKBIA; JUN; CHUK; PPP2R2A; CFLAR; MAPK1; GNA11; FADD; RELA; IKBKG	7189; 8772; 1147; 8837; 3725; 5290; 4792; 2776; 2767; 8517; 5970; 5520; 5594; 3551	102	102
0.000928956	0.00535256	2.27144	Viral carcinogenesis - Homo sapiens (human)	KEGG	path:hsa05203	HDAC2; HIST1H4K; NFKBIA; KAT2A; IKBKG; MAD1L1; PIK3CA; JUN; MAPK1; JAK1; NFKB2; RANBP1; TRAF2; CREB1; HIST1H2BD; HIST1H2BG; RHOA; RELA; BAK1; SCRIB; CDK4; CDK6	7186; 578; 2648; 3716; 8339; 5290; 4791; 4792; 8379; 5902; 3725; 5970; 1385; 387; 8517; 3017; 23513; 5594; 1021; 3066; 1019; 8362	201	201
0.00109097	0.00613988	2.21184	Toll-like receptor signaling pathway - Homo sapiens (human)	KEGG	path:hsa04620	IKBKB; TRAF6; PIK3CA; NFKBIA; JUN; CHUK; MAP3K7; RIPK1; MAP2K3; MAPK1; MAP2K7; IKBKG; FADD; RELA	7189; 8737; 8772; 1147; 3725; 5290; 4792; 6885; 3551; 8517; 5970; 5594; 5606; 5609	104	104
0.00114554	0.00630044	2.20063	Glioma - Homo sapiens (human)	KEGG	path:hsa05214	IGF1R; E2F3; SHC1; E2F1; PIK3CA; EGFR; BAK1; MAPK1; CDK4; SOS1; CDK6	1871; 3480; 6464; 578; 1869; 1956; 5594; 1019; 1021; 5290; 6654	71	71
0.00123271	0.00662922	2.17854	Ras signaling pathway - Homo sapiens (human)	KEGG	path:hsa04014	EGFR; RAP1B; GAB1; IKBKB; IKBKG; PIK3CA; MAPK1; RELA; IGF1R; NTF3; SHC1; RAB5C; EFNA3; CHUK; RHOA; FGFR1; BRAP; SOS1; PTPN11; INS; GRIN2B; SHOC2; ELK1; PAK2	3630; 8036; 5908; 1147; 5781; 5290; 2260; 4908; 6464; 5970; 2904; 8315; 387; 1944; 3480; 8517; 1956; 5878; 5062; 2002; 5594; 3551; 2549; 6654	232	232
0.00144724	0.00761373	2.1184	Leishmaniasis - Homo sapiens (human)	KEGG	path:hsa05140	ITGB1; NCF1; TRAF6; NFKBIA; JUN; MAP3K7; ELK1; FCGR1A; JAK1; MAPK1; RELA	3725; 7189; 2002; 2209; 653361; 4792; 5970; 5594; 6885; 3688; 3716	74	73
0.00158425	0.00815718	2.08846	AMPK signaling pathway - Homo sapiens (human)	KEGG	path:hsa04152	IGF1R; ACACA; ELAVL1; SCD; PPP2R2A; MAP3K7; CREB1; INS; SREBF1; FASN; PIK3CA; RAB10; PPP2R5E; TSC2; PPP2R5C	6319; 31; 3630; 6720; 3480; 7249; 5527; 2194; 5290; 6885; 10890; 1385; 5520; 5529; 1994	120	120
0.00196171	0.00989027	2.00479	PI3K-Akt signaling pathway - Homo sapiens (human)	KEGG	path:hsa04151	ITGB1; ITGA3; EGFR; IKBKB; IKBKG; TSC2; PIK3CA; HSP90AB1; MAPK1; JAK1; RELA; ERBB2; ERBB3; IGF1R; NTF3; ITGB5; EFNA3; PKN2; PPP2R2A; CHUK; CREB1; FGFR1; EIF4E2; SOS1; ITGAV; INS; CDK4; CDK6; PPP2R5E; VWF; PPP2R5C; MCL1	2064; 2065; 4170; 2260; 8517; 5527; 3480; 6654; 4908; 1019; 1021; 7249; 1147; 5290; 3326; 7450; 1385; 5520; 5529; 5586; 5594; 3551; 9470; 3630; 3675; 3685; 3688; 3693; 3716; 5970; 1944; 1956	354	353
0.00200389	0.00989677	2.00451	Central carbon metabolism in cancer - Homo sapiens (human)	KEGG	path:hsa05230	ERBB2; HK2; PIK3CA; G6PD; EGFR; SLC2A1; MAPK1; SCO2; LDHA; FGFR1	9997; 2064; 3099; 1956; 3939; 2260; 5594; 2539; 6513; 5290	65	65
0.00225278	0.0109035	1.96243	Non-small cell lung cancer - Homo sapiens (human)	KEGG	path:hsa05223	ERBB2; E2F3; SOS1; E2F1; PIK3CA; EGFR; BAK1; MAPK1; CDK4; CDK6	1956; 5290; 578; 1869; 1871; 5594; 2064; 1019; 1021; 6654	66	66
0.00243517	0.0115551	1.93723	Toxoplasmosis - Homo sapiens (human)	KEGG	path:hsa05145	ITGB1; MAP2K3; HSPA8; TRAF6; NFKBIA; BIRC2; CHUK; IKBKB; LDLR; MAPK1; IKBKG; JAK1; RELA; MAP3K7	7189; 3688; 1147; 3716; 329; 4792; 6885; 3312; 5970; 3949; 8517; 5594; 3551; 5606	113	113
0.00271112	0.0126171	1.89904	Protein processing in endoplasmic reticulum - Homo sapiens (human)	KEGG	path:hsa04141	BCAP31; SYVN1; TRAF2; DNAJA1; RAD23A; NFE2L2; HSPA8; SEL1L; BAK1; HSP90AB1; DNAJB11; MAP2K7; NSFL1C; SAR1A; STT3A; PLAA; SEC31A; UBE2G2	51726; 7186; 578; 3703; 5886; 9373; 55968; 4780; 3301; 3312; 3326; 6400; 22872; 56681; 7327; 10134; 84447; 5609	165	165
0.00310415	0.0138673	1.85801	Cushing syndrome - Homo sapiens (human)	KEGG	path:hsa04934	KMT2A; E2F3; GNAQ; AXIN1; ASH2L; E2F1; EGFR; MEN1; CREB1; RAP1B; LDLR; MAPK1; CDK4; CDK6; GNA11; FH; ARMC5	79798; 8312; 4221; 4297; 2767; 2776; 2271; 5908; 1869; 1871; 1385; 3949; 9070; 1956; 5594; 1019; 1021	154	154
0.00312254	0.0138673	1.85801	Endometrial cancer - Homo sapiens (human)	KEGG	path:hsa05213	ERBB2; SOS1; AXIN1; PIK3CA; EGFR; ILK; BAK1; ELK1; MAPK1	3611; 1956; 5290; 578; 2002; 5594; 2064; 8312; 6654	58	58
0.00315165	0.0138673	1.85801	Adipocytokine signaling pathway - Homo sapiens (human)	KEGG	path:hsa04920	TRAF2; SOCS3; ACSL3; PTPN11; NFKBIA; CHUK; SLC2A1; IKBKB; IKBKG; RELA	2181; 6513; 7186; 5781; 4792; 9021; 8517; 5970; 3551; 1147	69	69
0.00373573	0.0161437	1.792	Fatty acid biosynthesis - Homo sapiens (human)	KEGG	path:hsa00061	ACACA; ACSL3; FASN; MCAT	2181; 2194; 27349; 31	13	13
0.00398411	0.016915	1.77173	Influenza A - Homo sapiens (human)	KEGG	path:hsa05164	IKBKB; NFKBIA; DDX39B; ACTG1; SOCS3; TRIM25; ADAR; JAK1; JUN; HSPA8; MAP2K3; NXT1; MAP2K7; KPNA2; PIK3CA; MAPK1; VDAC1; RELA	7706; 71; 103; 3716; 3725; 5290; 4792; 7919; 3312; 7416; 3838; 9021; 5970; 29107; 5594; 3551; 5606; 5609	171	171
0.00412693	0.0172193	1.76399	Herpes simplex infection - Homo sapiens (human)	KEGG	path:hsa05168	DAXX; TRAF2; NFKBIA; SOCS3; TRAF6; SRSF9; PTPN11; JAK1; JUN; CHUK; MAP3K7; IKBKB; TAF4; IKBKG; FADD; RELA; TAF6L; SRPK1; CSNK2A1	7186; 7189; 8772; 6732; 1616; 1147; 3716; 3725; 5781; 4792; 6874; 6885; 3551; 9021; 8517; 5970; 10629; 1457; 8683	185	185
0.00431523	0.017365	1.76033	Adherens junction - Homo sapiens (human)	KEGG	path:hsa04520	ERBB2; IGF1R; ACTG1; SMAD4; EGFR; MAP3K7; MAPK1; RHOA; CSNK2A1; FGFR1	387; 3480; 5594; 6885; 1956; 71; 4089; 1457; 2260; 2064	72	72
0.00431523	0.017365	1.76033	Melanoma - Homo sapiens (human)	KEGG	path:hsa05218	IGF1R; E2F3; E2F1; PIK3CA; EGFR; BAK1; MAPK1; CDK4; CDK6; FGFR1	3480; 5290; 1871; 578; 2260; 1956; 5594; 1869; 1019; 1021	72	72
0.00437713	0.017365	1.76033	Kaposi sarcoma-associated herpesvirus infection - Homo sapiens (human)	KEGG	path:hsa05167	TRAF2; NFKBIA; E2F3; E2F1; PIK3CA; JAK1; JUN; CHUK; CREB1; GABARAP; IKBKB; MAPK1; MAP2K7; IKBKG; CDK6; FADD; CDK4; RELA; BAK1	7186; 578; 8772; 11337; 1385; 1147; 3716; 3725; 5290; 4792; 8517; 1869; 1871; 5970; 5594; 3551; 5609; 1019; 1021	186	186
0.00526259	0.0205411	1.68738	Bacterial invasion of epithelial cells - Homo sapiens (human)	KEGG	path:hsa05100	ITGB1; ACTG1; CRKL; ARPC2; ILK; GAB1; PIK3CA; CRK; RHOA; SHC1	387; 10109; 3611; 6464; 71; 1399; 3688; 2549; 1398; 5290	74	74
0.00565685	0.0215017	1.66753	mTOR signaling pathway - Homo sapiens (human)	KEGG	path:hsa04150	FLCN; IGF1R; EIF4E2; RRAGA; SOS1; RRAGC; SLC3A2; PIK3CA; CHUK; TBC1D7; IKBKB; MAPK1; RICTOR; RHOA; INS; TSC2	3630; 51256; 7249; 64121; 1147; 5290; 9470; 253260; 6520; 387; 3480; 10670; 201163; 5594; 3551; 6654	151	150
0.0056864	0.0215017	1.66753	Cell cycle - Homo sapiens (human)	KEGG	path:hsa04110	E2F4; E2F3; E2F1; MAD1L1; CDC25B; CDC25A; FZR1; STAG2; ORC5; SMAD4; HDAC2; CDK4; CDK6; PTTG1	9232; 8379; 51343; 1869; 1871; 1874; 5001; 4089; 993; 994; 10735; 3066; 1019; 1021	124	124
0.00650189	0.0239105	1.62141	Huntington disease - Homo sapiens (human)	KEGG	path:hsa05016	NDUFC2; TAF4; NDUFA3; CREB1; NDUFB7; NDUFV1; NDUFB3; NDUFB2; NDUFA8; NDUFA9; GRIN2B; NDUFS2; HDAC2; AP2A1; SLC25A5; NDUFS7; NDUFB9; VDAC1; GNAQ	4696; 374291; 292; 4702; 4704; 4708; 4709; 4713; 4718; 4720; 160; 4723; 2776; 6874; 2904; 1385; 4715; 7416; 3066	193	193
0.00652104	0.0239105	1.62141	Fluid shear stress and atherosclerosis - Homo sapiens (human)	KEGG	path:hsa05418	IKBKB; NCF1; ACTG1; NFE2L2; JUN; CHUK; ITGAV; MAP3K7; HSP90AB1; KEAP1; MAP2K7; IKBKG; PIK3CA; RHOA; RELA	653361; 71; 9817; 3685; 1147; 3725; 4780; 6885; 3326; 387; 8517; 5970; 3551; 5609; 5290	139	139
0.00738997	0.0266921	1.57362	Glycosaminoglycan biosynthesis - heparan sulfate / heparin - Homo sapiens (human)	KEGG	path:hsa00534	B3GALT6; EXTL3; XYLT2; EXT1; B4GALT7	11285; 64132; 126792; 2131; 2137	24	24
0.00887365	0.0315797	1.50059	Regulation of actin cytoskeleton - Homo sapiens (human)	KEGG	path:hsa04810	ITGB1; ITGA3; ITGB5; DIAPH1; CRKL; PIK3CA; PIP5K1A; MYH9; EGFR; ITGAV; INS; MAPK1; SOS1; ARHGEF7; ARPC2; CRK; RHOA; ACTG1; PAK2; FGFR1	4627; 3630; 3675; 3685; 3688; 1729; 3693; 5290; 8394; 2260; 10109; 1398; 1399; 387; 1956; 71; 5062; 5594; 8874; 6654	213	213
0.00963838	0.0338042	1.47103	Thermogenesis - Homo sapiens (human)	KEGG	path:hsa04714	NDUFV1; ACTG1; NDUFB9; NDUFB7; ACSL3; NDUFB3; NDUFC2; NDUFA8; NDUFA9; MAP2K3; COX20; NDUFAF7; SOS1; CREB1; SMARCD1; NDUFS7; NDUFS2; NDUFB2; FGFR1; TSC2; NDUFA3	116228; 374291; 55471; 71; 4696; 4702; 4704; 4723; 4709; 4718; 4713; 4715; 2181; 4720; 2260; 1385; 4708; 6602; 5606; 7249; 6654	229	229
0.00988903	0.0341878	1.46613	Proteoglycans in cancer - Homo sapiens (human)	KEGG	path:hsa05205	ERBB2; ERBB3; IGF1R; DROSHA; ITGB5; ACTG1; TFAP4; PIK3CA; PTPN11; EGFR; ITGAV; GAB1; ELK1; ITGB1; SOS1; CD44; MAPK1; RHOA; FGFR1	2064; 2065; 71; 3685; 3688; 3693; 5781; 5290; 2260; 7023; 387; 3480; 1956; 29102; 960; 2002; 5594; 2549; 6654	201	201
0.0103882	0.0350472	1.45535	Oxidative phosphorylation - Homo sapiens (human)	KEGG	path:hsa00190	NDUFC2; NDUFA3; NDUFB9; NDUFB7; NDUFB3; NDUFV1; ATP6AP1; NDUFB2; NDUFA8; NDUFA9; NDUFS2; PPA2; NDUFS7; ATP6V0E1	374291; 537; 4708; 4696; 4702; 4704; 4709; 4713; 4715; 4718; 4720; 4723; 8992; 27068	133	133
0.010512	0.0350472	1.45535	Selenocompound metabolism - Homo sapiens (human)	KEGG	path:hsa00450	PAPSS1; SEPHS1; SEPSECS; TXNRD1	7296; 9061; 22929; 51091	17	17
0.0105721	0.0350472	1.45535	Insulin resistance - Homo sapiens (human)	KEGG	path:hsa04931	SOCS3; PIK3CA; PTPN11; NFKBIA; CREB1; INS; IKBKB; SREBF1; SLC2A1; GFPT1; RELA; MGEA5	3630; 6720; 2673; 5781; 5290; 4792; 9021; 5970; 1385; 6513; 3551; 10724	107	107
0.0109105	0.0356803	1.44757	B cell receptor signaling pathway - Homo sapiens (human)	KEGG	path:hsa04662	SOS1; PIK3CA; NFKBIA; JUN; CHUK; IKBKB; MAPK1; IKBKG; RELA	3725; 8517; 5290; 4792; 5970; 5594; 3551; 1147; 6654	71	70
0.0160599	0.0518198	1.2855	HIF-1 signaling pathway - Homo sapiens (human)	KEGG	path:hsa04066	ERBB2; IGF1R; EIF4E2; HK2; PIK3CA; EGFR; SLC2A1; INS; MAPK1; RELA; LDHA	2064; 3099; 3630; 5290; 5970; 3939; 6513; 3480; 1956; 5594; 9470	100	100
0.0171179	0.0540463	1.26723	Cytosolic DNA-sensing pathway - Homo sapiens (human)	KEGG	path:hsa04623	IKBKB; ADAR; NFKBIA; CHUK; RIPK1; POLR1D; IKBKG; RELA	51082; 8517; 8737; 4792; 5970; 3551; 1147; 103	63	63
0.0171966	0.0540463	1.26723	Ribosome biogenesis in eukaryotes - Homo sapiens (human)	KEGG	path:hsa03008	UTP6; DROSHA; GNL3L; WDR36; RPP25L; REXO1; UTP14A; NXT1; XRN1; POP4; CSNK2A1	55813; 10775; 29107; 10813; 57455; 54552; 134430; 54464; 29102; 1457; 138716	105	101
0.0177018	0.0549211	1.26026	Parkinson disease - Homo sapiens (human)	KEGG	path:hsa05012	NDUFC2; NDUFA3; NDUFB9; NDUFB7; NDUFV1; NDUFB3; NDUFB2; NDUFA8; NDUFA9; NDUFS2; UBE2G2; SLC25A5; NDUFS7; VDAC1	374291; 4696; 4702; 4704; 4708; 4709; 4713; 4715; 4718; 4720; 4723; 7327; 292; 7416	142	142
0.0184717	0.0565843	1.2473	Longevity regulating pathway - Homo sapiens (human)	KEGG	path:hsa04211	EHMT1; IGF1R; EHMT2; PIK3CA; CREB1; INS; EIF4E2; RB1CC1; TSC2; RELA	3630; 9821; 7249; 10919; 5290; 9470; 5970; 1385; 3480; 79813	89	89
0.0191118	0.0570993	1.24337	Citrate cycle (TCA cycle) - Homo sapiens (human)	KEGG	path:hsa00020	IDH3A; ACLY; ACO2; FH; DLD	47; 50; 1738; 3419; 2271	30	30
0.0191118	0.0570993	1.24337	Pentose phosphate pathway - Homo sapiens (human)	KEGG	path:hsa00030	PGLS; TKT; G6PD; RPIA; GPI	2821; 22934; 7086; 25796; 2539	30	30
0.0195467	0.0576866	1.23892	Bladder cancer - Homo sapiens (human)	KEGG	path:hsa05219	ERBB2; E2F3; E2F1; EGFR; MAPK1; CDK4	1871; 2064; 1869; 5594; 1956; 1019	41	41
0.0207494	0.0604054	1.21892	Measles - Homo sapiens (human)	KEGG	path:hsa05162	HSPA8; TRAF6; PIK3CA; ADAR; NFKBIA; CHUK; TNFAIP3; MAP3K7; CDK4; CDK6; JAK1; RELA; CSNK2A1	7189; 103; 1147; 3716; 5290; 4792; 6885; 3312; 5970; 1457; 7128; 1019; 1021	132	131
0.0209671	0.0604054	1.21892	C-type lectin receptor signaling pathway - Homo sapiens (human)	KEGG	path:hsa04625	RHOA; PIK3CA; PTPN11; NFKBIA; JUN; CHUK; IKBKB; MAPK1; IKBKG; NFKB2; RELA	1147; 3725; 5781; 4791; 4792; 3551; 8517; 5970; 387; 5594; 5290	104	104
0.022143	0.0630425	1.20037	Acute myeloid leukemia - Homo sapiens (human)	KEGG	path:hsa05221	SOS1; PIK3CA; CHUK; IKBKB; MAPK1; IKBKG; FCGR1A; RELA	2209; 5290; 8517; 5970; 5594; 3551; 1147; 6654	66	66
0.02279	0.0641299	1.19294	RNA degradation - Homo sapiens (human)	KEGG	path:hsa03018	DCPS; DCP2; BTG1; ZCCHC7; SKIV2L; XRN1; PAPD5; CNOT7; CNOT4	64282; 28960; 694; 29883; 54464; 167227; 84186; 6499; 4850	79	79
0.0243722	0.0677938	1.16881	GnRH signaling pathway - Homo sapiens (human)	KEGG	path:hsa04912	GNAQ; SOS1; JUN; EGR1; EGFR; MAP2K3; ELK1; MAP2K7; GNA11; MAPK1	3725; 2767; 2776; 5606; 1956; 1958; 2002; 5594; 5609; 6654	93	93
0.0303502	0.083463	1.07851	Prolactin signaling pathway - Homo sapiens (human)	KEGG	path:hsa04917	ESR2; SHC1; SOCS3; PIK3CA; INS; MAPK1; SOS1; RELA	5290; 3630; 9021; 6464; 5970; 5594; 2100; 6654	70	70
0.0314311	0.0854645	1.06821	SNARE interactions in vesicular transport - Homo sapiens (human)	KEGG	path:hsa04130	USE1; SNAP23; BNIP1; VTI1B; STX4	662; 6810; 8773; 10490; 55850	34	34
0.0326832	0.0878815	1.0561	Type II diabetes mellitus - Homo sapiens (human)	KEGG	path:hsa04930	SOCS3; HK2; PIK3CA; INS; IKBKB; MAPK1	3099; 5290; 3630; 9021; 5594; 3551	46	46
0.0356004	0.0940223	1.02677	Progesterone-mediated oocyte maturation - Homo sapiens (human)	KEGG	path:hsa04914	IGF1R; MAD1L1; PIK3CA; CDC25A; FZR1; KIF22; HSP90AB1; MAPK1; CDC25B; INS	3630; 8379; 51343; 5290; 3835; 3326; 3480; 5594; 993; 994	99	99
0.035861	0.0940223	1.02677	Cysteine and methionine metabolism - Homo sapiens (human)	KEGG	path:hsa00270	AHCYL1; SMS; SRM; APIP; LDHA; AMD1	51074; 262; 10768; 6723; 6611; 3939	47	47
0.0361325	0.0940223	1.02677	Phosphonate and phosphinate metabolism - Homo sapiens (human)	KEGG	path:hsa00440	PCYT1A; CEPT1	5130; 10390	6	6
0.036623	0.0940962	1.02643	Alzheimer disease - Homo sapiens (human)	KEGG	path:hsa05010	NDUFC2; NDUFA3; NDUFB9; NDUFB7; NDUFS7; NDUFB3; NDUFB2; NDUFA8; NDUFA9; GRIN2B; NDUFS2; MAPK1; FADD; NDUFV1; GNAQ	2904; 374291; 8772; 4708; 4696; 4702; 4704; 4709; 4713; 4715; 4718; 4720; 4723; 2776; 5594	171	171
0.0369386	0.0940962	1.02643	Colorectal cancer - Homo sapiens (human)	KEGG	path:hsa05210	SOS1; AXIN1; SMAD4; PIK3CA; JUN; BAK1; MAPK1; RHOA; EGFR	578; 8312; 3725; 5290; 387; 1956; 5594; 4089; 6654	86	86
0.0390987	0.0985612	1.00629	DNA replication - Homo sapiens (human)	KEGG	path:hsa03030	SSBP1; POLE3; POLA1; RNASEH2A; LIG1	3978; 10535; 5422; 6742; 54107	36	36
0.0422243	0.105343	0.977394	Thyroid hormone signaling pathway - Homo sapiens (human)	KEGG	path:hsa04919	HDAC2; ACTG1; PIK3CA; MED24; ITGAV; MAPK1; KAT2A; MED16; TSC2; SLC2A1; NCOR1	71; 7249; 2648; 3685; 9862; 5290; 10025; 6513; 9611; 5594; 3066	116	116
0.0427946	0.105676	0.976022	N-Glycan biosynthesis - Homo sapiens (human)	KEGG	path:hsa00510	ALG8; ALG6; DOLPP1; STT3A; ALG13; DPM3	54344; 79053; 29929; 57171; 3703; 79868	49	49
0.0449117	0.109784	0.959461	Rap1 signaling pathway - Homo sapiens (human)	KEGG	path:hsa04015	ITGB1; MAP2K3; IGF1R; GNAQ; CRKL; PIK3CA; EFNA3; RAP1B; INS; GRIN2B; MAPK1; EGFR; RAPGEF1; CRK; RHOA; FGFR1; ACTG1	3630; 71; 3688; 5290; 2776; 5908; 2260; 2889; 2904; 5606; 1398; 1399; 387; 3480; 1944; 1956; 5594	206	206
0.048884	0.118299	0.927018	Retrograde endocannabinoid signaling - Homo sapiens (human)	KEGG	path:hsa04723	NDUFV1; NDUFA3; NDUFB9; NDUFB7; NDUFB3; NDUFB2; NDUFA8; NDUFA9; NDUFC2; NDUFS2; MAPK1; NDUFS7; GNAQ	4723; 4696; 4702; 4704; 4708; 4709; 4713; 4718; 4715; 4720; 2776; 5594; 374291	148	148
