# Supplementary material for: Genome-wide CRISPR screens of oral squamous cell carcinoma reveal fitness genes in the Hippo pathway
Source: eLife. 2020 Sep 29;9:e57761. doi: 10.7554/eLife.57761 (PMC7591259; doi:10.7554/eLife.57761)
Supplement: Supplementary file 5. [file elife-57761-supp5.xlsx]

## Sheet: Supplementary file 5
Supplementary file 5 - Classification of the 918 non-core essential genes based on target tractability.
Bucket 1	Bucket 2	Bucket 3	Bucket 4	Bucket 5	Bucket 6	Bucket 7	Bucket 8	Bucket 9	Bucket 10
EGFR	CDK12	MCL1	FDX1L	TPRKB	SSB	TLK2	GPX4	OBFC1	NELFCD		* Genes were classified into different bucket based on the target's tractability for small molecules (SM), according to Behan et al. (2019). Targets in bucket 1 are considered the most tractable and the predicted tractability and confidence in the data decreases from bucket 1 to bucket 10.
TUBB4B	CSNK2A1	BRD2	PTPN11	UFC1	STAMBP	ITGB1	RBM10	SMC6	GPKOW
CDK6	IGF1R	KAT2A	ADAR	SHC1	MAPRE1	PAK2	TIPARP	UBE2C	UTP6
POLA1	IKBKB	MEN1	GAK	UBE2H	VDAC1	BRD7	TRPM7	ATXN10	HTATSF1
TYMS	MAPK1	SRPK1	VRK1	ILK	VPS4B	CIT	CYB5R4	DCP2	EIF3J
PIK3CA	CDK8		DDX39B	SCO2	HEXIM1	IKBKG	GLRX3	EFR3A	LIMS3
FASN	DOT1L		GPI	RNASEH2A	PDCD6IP	JUN	WARS2	ZWINT	LIN52
NDUFB7			MRPL47	PTP4A1	TRIM28	CNOT7	DUSP10	CAND1	TAF1A
FKBP1A			STAG2	ACACA	ARHGAP11A	MPI	ENDOG	FBXW11	XRN1
NDUFC2			METAP1	BSG	ERI1	PIP5K1A	INPP5A	FOSL1	ALG13
NDUFS2			TAF1	ITGAV	FBXW7	PPME1	TUBD1	SNRPB2	ARHGEF7
NDUFV1			AIFM1	NEURL4	NFKB2	CDC25A	TUBG2	TRIM37	CLASRP
TXNRD1			AMD1	PALB2	AHCYL1	CHUK	EXOG	CTU1	ELP4
ERBB2			MRPL44	PDCL2	DTD1	NFE2L2	FKBP9	EDF1	INTS10
ERBB3			TNPO1	PPP2R5C	ERCC4	NPY4R	FUT1	HIST1H2BG	ADAT3
NDUFB2			VPS16	SCO1	FH	ST3GAL1	ITGA3	JUNB	CTC1
NDUFB9			PITRM1	SMAD4	FTSJ2	TUBA3D	LMTK2	MYH9	ENY2
NDUFS7			YAP1	SUV39H2	KIF22	ITGB5	MTMR4	NGDN	WDR73
UGCG			ATP6AP2	TRAF2	NFKBIA	MAP2K3	SLC25A5	POP4	ATP6AP1
FGFR1			HSPA8		NR2C2	MGEA5	ZRANB1	ZRSR2	ELOF1
IMPDH2			MARK2		USP14	PTPN12	NRD1	MFN2	UBE2S
KEAP1			MRPL17			SLC11A2		NUP50	WDR36
NDUFA3			MRPL23			SLC16A1		ARID2	LSM10
NDUFA8			RAD1			TLK1		CRKL	POLR2M
NDUFA9			SMS			USP9X		NSMCE2	PRR13
CDK4			MRPL20					POT1	C18orf21
ESR2			MRPS18A					TMED10	NOSIP
GRIN2B			PMVK					BTAF1	PMF1-BGLAP
HDAC2			SEPSECS					FOXM1	RPP25L
JAK1			SLC2A1					KIF4A	SSBP1
NDUFB3			CAD					KNTC1	WDR83
PDE4D			CCNC					MCPH1	DNLZ
PTGER4			GFPT1					MED23	GTF2F1
			MRPL37					POMP	MPRIP
			SCD					BNIP1	NDE1
			TEAD1					CIR1	PCYT1A
			WDR48					IDH3A	RTEL1
			LCMT1					SKA2	SLC25A38
			MAP3K7					SMARCA5	VBP1
			RELA					STX4	DSCR4
			GMNN					VPS53	EAPP
			HUS1					XRCC2	QRSL1
			LDHA					ACTG1	RPUSD4
			LGALS9					FIS1	SYT15
			PMM2					FZR1	TRMT61A
			PRPF4B					HIST1H2BD	VMA21
			RAB7A					PPA2	VPS37A
			RHOA					PQBP1	ATP5F1
			RNF31					SAFB	C1orf131
			TKT					SMG7	CENPL
			ACLY					WWTR1	CHMP3
			B4GALT7					ATG9A	DDA1
			BRPF1					F8A3	DHX35
			CANT1					NXT1	GABPB1
			DCPS					SLC35A2	LEMD2
			DLD					SLC4A7	SNAP23
			DPY30					TEFM	STT3A
			MRPL52					TIAL1	TFB1M
			RIPK1					UBE2V1	ZFX
			RNH1					USB1	FBXO42
			RRAGC					USP18	GNL3L
			UAP1					ZFP36L1	GTF3C3
			UGP2					AMBRA1	MATR3
			ADRBK1					ATP6V0E1	PINX1
			ARF1					BTG1	POM121C
			BAK1					CCDC12	TAF12
			BIRC2					CUL3	TRMT6
			CD44					DDX28	VEZT
			CDC25B					E2F1	ATMIN
			EIF4E2					FBXO11	CCDC51
			FERMT2					KLF5	CENPO
			G6PD					LARP1	CEP44
			GALE					LARP7	FAM103A1
			GATSL3					MPHOSPH8	FUBP1
			GNPNAT1					PGM3	INTS12
			HIST1H3G					SLC35B2	LAGE3
			HIST2H3C					THRAP3	MED16
			HIST3H3					TRIP13	MED24
			ICT1					VPS54	MRPS2
			INS					AASDHPPT	NSMCE4A
			JAG1					ACO2	PPP2R2A
			MRPL11					ARPC2	RRAGA
			MRPL24					CCDC6	SLC39A10
			OTUD5					CHMP1B	WAC
			PDS5B					CYB5B	XPOT
			PKN2					E2F3	ACTR3
			RAB10					FANCI	ANKRD49
			RMI2					GIGYF2	APIP
			UMPS					ISCA1	CXorf56
			YTHDF2					KIF15	DEXI
			ATOX1					KLF16	GPATCH1
			AXIN1					POLR1D	HAUS2
			BCAP31					RPIA	KCTD10
			BLM					SLMAP	MAEA
			CASC3					SPICE1	MRPS18C
			CSK					TBL1XR1	POC1A
			CSNK1D					TMCO6	RANBP3
			DAXX					TSEN15	TADA2B
			EHMT1					VPS52	UBE3D
			EHMT2					ZBTB7A	ZNF236
			FCGR1A					ALG6	ZNF511
			FDX1					ARHGAP29	ASCC3
			FOLR1					ASH2L	BCCIP
			GABARAP					ASPM	BRAT1
			GGA1					BAZ1B	C19orf25
			GGT1					BCL2L13	CENPQ
			HIST1H4K					BNIP3	CHCHD3
			HK2					CCP110	DHX38
			HSP90AB1					CD151	EIF3K
			IDI1					CREB1	FAM122A
			ISG15					CRK	FKBPL
			KMT2A					DARS2	GTF2IRD2B
			KPNA2					DLGAP5	GTPBP8
			LDLR					DROSHA	INO80B
			LIG3					EAF1	LCE2A
			MAP2K7					ECSIT	MAD2L1BP
			MCAT					EMC2	MPDU1
			MRPL22					EXTL3	NAA30
			MRPL40					FADD	PYURF
			MRPL42					FAM50B	RBM33
			MRPL51					FCGR1B	TIMM17A
			MRPS30					FCHO2	TRUB2
			MTHFD1					FGFR1OP2	UBE2G2
			NCF1					GNAQ	UFSP2
			NCOA5					GTSE1	UPK3BL
			NCOR1					HMMR	VPS4A
			PAPSS1					IRF2	ARMC5
			PARVA					JTB	CAPRIN1
			PEX5					KDSR	CD3EAP
			PHIP					KIF18B	CENPI
			RAB1A					LIG1	CENPP
			RAB5C					MESDC2	CNOT11
			RANBP1					NIPBL	DHRSX
			RAP1B					PCM1	DHX29
			RBBP7					PDSS1	DNAJB6
			RBM5					PGP	DPH1
			RTN4IP1					PTTG1	EEFSEC
			SEPHS1					RICTOR	GET4
			SNRPA					RNF114	LIN7C
			SOS1					RSU1	LSM14A
			SRM					SCYL1	MED19
			UBE2K					SIGLEC11	MIPEP
			UBE2T					SLC3A2	MTG1
			VWF					SPAG5	MTRF1L
			WAPAL					SYNCRIP	NARS2
								TAF4	NGRN
								TAZ	PPP1R14B
								TIMM8A	RGP1
								TNFAIP3	RNF103-CHMP3
								TRMT10C	SPNS1
								TSC2	TBC1D20
								TSC22D2	TEAD3
								UTP14A	TMEM165
								VPS45	TMEM230
								XYLT2	VCPIP1
								YME1L1	WRB
								ABCD1	YIPF5
								ACOX1	ZC3HC1
								ACSL3	ZNF285
								ALG8	ZNHIT1
								ALS2CL	AMBN
								AP1S2	ANKRD52
								ARRB2	ARHGAP11B
								ATP13A1	ARMC10
								ATRX	C11orf73
								B3GALT6	C15orf41
								B3GNT2	C17orf49
								B3GNT5	CCDC22
								BRAP	CDK5RAP3
								CARS2	CNEP1R1
								CEPT1	CNOT4
								CFLAR	COMMD4
								CHST8	COQ2
								CKAP2	CWF19L1
								CLCC1	DOLPP1
								COQ3	EPG5
								DIAPH1	FLCN
								DNAJA1	HNRNPF
								DNAJB11	HNRNPH3
								DOCK5	HSPA13
								DPM3	IRF2BP2
								E2F4	IST1
								EFNA3	KANSL1
								EGR1	KIAA2013
								EHF	KRBOX4
								ELAVL1	MBD3
								ELK1	METTL15
								ERCC6L	MRPS33
								ESCO2	NFU1
								EXT1	NUFIP1
								FANCA	PDCL
								FANCD2	PHF10
								FBXO7	PHF23
								FERMT1	PHF6
								GAB1	PUS3
								GCNT2	RAB35
								GNA11	SHOC2
								GOLT1B	SLC25A46
								GPRIN2	SLX4
								HIST1H2AC	TAF6L
								HNRNPA2B1	TAGLN2
								HOXA9	TECR
								IL9R	TFAP4
								IREB2	TIMMDC1
								KIAA1524	UBE2NL
								KIF20A	USE1
								KLF3	USP34
								KLF4	ZBTB12
								LMNA	ZC3H3
								MAD1L1	ZCCHC7
								MBD2	ZNF706
								MCOLN3	ACTR3C
								MED25	ANKHD1
								MKI67	ANKRD17
								MNT	AP2A1
								MT1E	ARID4A
								MTA2	ARID4B
								MYL6	ASCC1
								NAIP	ATF7
								NTF3	ATP5H
								NUP188	ATP5J
								ORC5	ATP5SL
								OSBP	BOD1L1
								PCDH7	BOLA3
								PEX10	BTBD9
								PGLS	C12orf49
								PICALM	C16orf59
								PLAA	C16orf72
								PLEKHM1	C1orf122
								PNISR	C21orf2
								POLE3	C2orf76
								POU2F1	CCDC106
								PTGES3	CCDC152
								RAD23A	CENPU
								RAD51B	CEP97
								RB1CC1	CHD8
								RBM15	CMIP
								RBM26	CMTR2
								REXO1	COG7
								RMND1	COX20
								SAR1A	CRCT1
								SEC31A	CSDE1
								SEL1L	CSTF2
								SEL1L3	CWC25
								SFR1	DEFB125
								SKIV2L	DHX30
								SLC19A2	DPH2
								SLC31A1	DSTN
								SLC38A2	DUS1L
								SMARCD1	DUXA
								SOCS3	DYNLT1
								SOX9	EIF1AY
								SREBF1	EIF4ENIF1
								SRSF9	EMB
								SSX4	EPC2
								SURF4	ERAL1
								SYVN1	FAM175A
								TFPT	FAM72D
								THUMPD1	FEM1B
								TM9SF2	FERMT3
								TNIP1	FITM2
								TRAF6	FLII
								TRIM25	FOXK1
								TSR3	FOXRED1
								TTC7A	GATC
								UBA6	GCAT
								UBAP2L	GCSH
								UBE2Z	GMCL1
								UVRAG	GOLPH3
								VANGL2	GPATCH8
								WRAP73	GPS2
								ZNF148	GTPBP3
								ZNF37A	HAPLN4
								ZNF532	HEATR3
								ZWILCH	HELZ
								KIAA0947	HEPN1
									HIST1H2AK
									HSBP1
									IER3IP1
									IFT80
									KPNA4
									KRT86
									KRTAP21-1
									LCN15
									LENG1
									LIN37
									LRRC57
									LUC7L2
									LYRM2
									MCTS1
									MROH6
									MRPS28
									MSL1
									MTO1
									MTX2
									NDUFAF7
									NSFL1C
									NUP37
									PAPD5
									PAXIP1
									PIGY
									POM121
									POTEJ
									PPP2R5E
									PPP6R3
									PRCC
									RABL2B
									RALGAPB
									RAPGEF1
									RBM12B
									RBMX2
									RIF1
									RNF217
									RPRD1B
									RPUSD3
									SCRIB
									SEC23IP
									SLIRP
									SMARCAL1
									SREK1
									SRRD
									SUDS3
									TBC1D31
									TBC1D7
									TCEAL7
									THAP3
									THAP5
									TM2D1
									TM2D2
									TM2D3
									TM9SF3
									TMEM119
									TMEM201
									TMEM242
									TMEM30A
									TMEM41B
									TOX4
									TRIM49D1
									TRIM73
									UBIAD1
									VTI1B
									XAGE3
									YIPF2
									YIPF6
									YPEL3
									ZBTB39
									ZFP91
									ZNF593
									ZNF638
									ZSWIM8
									ZZZ3
									C16orf80
									PET112
									KIAA1432
									LOC729574
									C19orf40
									C9orf41
									KIAA1731
									ANKRD32
									TOMM70A
									MARCH5
									NARG2
									C19orf82
									KIAA0020
									PCNXL3
									SELRC1
