# Supplementary material for: Genome-wide CRISPR screens of oral squamous cell carcinoma reveal fitness genes in the Hippo pathway
Source: eLife. 2020 Sep 29;9:e57761. doi: 10.7554/eLife.57761 (PMC7591259; doi:10.7554/eLife.57761)
Supplement: Supplementary file 6. [file elife-57761-supp6.xlsx]

## Sheet: Supplementary file 6
Supplementary file 6 - Differentially expressed genes (DEGs) used to derived Z-score for computing of dependency scores
YAP1_dep - Up regulated DEGs	YAP1_dep - Down regulated DEGs	WWTR1_dep - Up regulated DEGs	WWTR1_dep - Down regulated DEGs	Compensable - Up regulated DEGs	Compensable - Down regulated DEGs
DNAJC6	HSPB1	B3GNT5	FSTL1	MMP2	MMP2
URB2	MPZL2	CDH3	LINC01963	BBOX1	BBOX1
CHPT1	BBS2	ITGA5	CERK	SH3RF2	SH3RF2
ZNF695	C1R	TGM1	B3GALNT1	COL3A1	COL3A1
DACT2	C1RL	KPNA7	BASP1	GPC4	GPC4
SKA3	DTX2	ARSI	GLT8D2	EPB41L4A	EPB41L4A
DIAPH3	REEP6	PDZK1IP1	FBN2	BMF	BMF
ITPK1	COL4A5	HES2	CACHD1	HMGN5	HMGN5
NUP155	PTPRS	FAM3C	NECTIN3	EDIL3	EDIL3
TRIO	ARHGEF37	CALML5	PSAT1	SESN3	SESN3
ALOXE3	PIR	S100P	MRPL48	GJA1	GJA1
NOCT	OCIAD2	C15orf48	TSEN15	GPNMB	GPNMB
TOP3A	PROM2	SERPINB5	ATP5PB	HS3ST3B1	HS3ST3B1
TCHP	CD24	TMBIM1	MFAP5	ADM2	ADM2
AXL	CHMP2A	CEACAM6	CACNG4	COL1A1	COL1A1
KRT80	DDIT4	PCDH1	ALDH1L2	SLC1A4	SLC1A4
TFAM	BST2	ALOX15B	POLD2	HSPB3	HSPB3
BRCA2	AKR1B10	PLCG2	LANCL2	SLC2A3	SLC2A3
MYH15	SCPEP1	ANGPTL4	NUAK1	G6PD	G6PD
MRPL1	ITM2B	SMURF1	ARHGAP42	SCARA3	SCARA3
CALB1	MFGE8	CMPK2	MAP1B	CFH	CFH
ZNF718	SLC22A18	IRAK2	EVA1A	NDUFA1	NDUFA1
RFC3	KIAA0513	CLDN4	MPP1	ADGRL2	ADGRL2
PRAG1	DNASE2	ACP5	PHGDH	NUPR1	NUPR1
MIR548L	PIGZ	USP31	OLR1	HRAT92	HRAT92
GEN1	ABCG1	KRTCAP3	CRIM1	PLA2R1	PLA2R1
BRCA1	ATP9A	KLK7	STC2	AKR1C2	AKR1C2
GINS1	TSKU	RNF223	TOP2B	COL16A1	COL16A1
LOC100506178	PDIA3	SUSD3	ANKRD1	C1orf21	C1orf21
ANXA3	LRP1	KLK8	LRIG1	HEY1	HEY1
ATAD2	NLRC5	MAOA	NUDT15	GOLGA8N	GOLGA8N
LRRK1	NAGLU	GRB7	DLX1	ZNF711	ZNF711
PPP1R14B	MMP14	CYB5R1	DTWD2	MAFB	MAFB
PTPN11	LRRC23	FOXA1	PBK	ZSCAN31	ZSCAN31
TAF5	STARD5	IGFBP6	ATL3	SH3BGRL	SH3BGRL
EIF5	DHRS7	TRIM31	DPYSL3	ANXA6	ANXA6
SLC7A5	PAQR6	GRIN2D	PDGFC	RDX	RDX
GPRC5D	GSTK1	DDX3Y	TRIM58	PLGRKT	PLGRKT
PUSL1	ARRDC3	MELTF	ADAMTS12	WNT6	WNT6
LIFR	BTN3A2	B3GNT7	PSPH	NREP	NREP
KLHL23	GSTA4	NECTIN4		FABP4	FABP4
KNTC1	UBA7	TFCP2L1		WNT5A	WNT5A
FAM173B	BTN3A1	CALML3		COX7B	COX7B
CHML	SLC37A2	ZSCAN16		RGCC	RGCC
RAB3B	DGLUCY	CD74		TPM1	TPM1
BDNF	THBS3	PLSCR1		BCL11A	BCL11A
MOK	CHMP1B	DBNDD1		SYT7	SYT7
STAG1	CD82	TACSTD2		AKR1C3	AKR1C3
RPS6KA4	GBP1	KLK5		SUMF2	SUMF2
TONSL	ORAI3	POMT1		SNCA	SNCA
STARD13	CLU	LRRC8A		JDP2	JDP2
WDR43	SDR42E1	CD40		NDUFB6	NDUFB6
ESRG	TMEM173	LGALS9		SCARF2	SCARF2
CCT2	ING4	CTSV		SPTLC3	SPTLC3
C12orf75	TRPV4	MOCOS		MLLT3	MLLT3
IARS	GPCPD1	RAET1G		CYBRD1	CYBRD1
CLCN4	GJB2	TAP1		SLITRK6	SLITRK6
DDIAS	STARD4	NRIP1		COL1A2	COL1A2
CST6	PGAP3	CA2		MMP1	MMP1
CTPS1	NUCB1	PMAIP1		IGFBP5	IGFBP5
SCML2	RNF145	ISG20		SOX2	SOX2
RAD18	GBP6	GCA		SMARCA1	SMARCA1
THBS1	VSNL1	RAPGEFL1		PLXND1	PLXND1
LINC01436	TSC22D3	HSH2D		ABCA13	ABCA13
FAM216A	APLP2	CXCL11
E2F1	PLCH2	PRKY
KIAA1549	HIST1H2AC	LIPH
RAD54L	CRELD1	EGR1
CYP1B1-AS1	DMPK	CLDN7
SUV39H2	BTN3A3	NOMO2
STIP1	CMTM3	ST14
NT5DC2	FAM234A	SAA1
HYI	SMIM14	RTN4RL1
FLNC	UBE2L6	COX6B2
CDC6	ATP2B4	IFIT2
FUT4	TAPBP	TMEM171
COPS3	CYP4F3	TMEM140
TERT	GPRC5C	CALML3-AS1
MCM2	HIST1H2BK	SGSH
KRT18	KRT15	PPL
NEURL1	PSORS1C3	HERC5
HGH1	UBQLN2	VMP1
MCM4	IFITM10	STEAP4
MYBL2	TSPAN9	SLC17A9
DCUN1D5	NOL3	IL4R
CENPO	FAAH	RNF225
SF3A3	ATP6AP2	ALDH1A3
C11orf68	TP53TG1	ADAM8
CRY1	NCOA3	OAS3
NUP107	STAT2	CHRNB1
CHMP2B	PORCN	FBLN1
ALYREF	MAN2B2	LOXL4
NKX1-2	RAB27B	LARGE2
FAM169A	LPAR6	KLK10
RNASEH1-AS1	DTX2P1-UPK3BP1-PMS2P11	IL32
E2F2	ST6GALNAC2	LINC01629
TMPO	ZC3H12A	ITGB6
OXCT1	MIR570	HLA-B
PRKAR1B	TMEM8B	SDC4
VPS9D1-AS1	PBXIP1	KRT87P
SLC43A3	TMEM219	LAMC2
NUP54	TMEM229B	RNF19B
TMEM123	YPEL5	LY6E
CLSPN	UPK3B	S100A14
DTL	CDKN1A	IRF7
PPP6R3	RADX	SERPINB13
SPAG1	LAMP2	DUOXA1
NOL9	CCDC146	SCNN1A
ANKRD13A	PTK7	N4BP1
RAF1	MIR548AN	MAPK15
WWC1	SLC25A28	DPP7
FRMD6	SCD	DDX58
CTNNAL1	DCAKD	LRG1
RASAL2	TMPRSS4	NFKBIZ
CERKL	GM2A	ETV7
SGK1	PLD3	HERC6
TRIML2	APOBEC3G	PLEKHA4
CXCL5	CRYL1	CA9
KRT8	PPIC	HCAR2
EXO1	FAM114A1	UNC93B1
SNORD48	LOC101928837	MXD1
ANKRD33B	LYPD3	AIM2
KLC2	MANBA	SLFN5
H19	SEMA3F	TDRD7
PRKDC	GBP2	USP18
TRAIP	HIST1H2BD	MYO18A
CCDC85B	H2BFS	NET1
SNORD93	RRAS	PRSS8
DLEU2	DUSP16	SAMD9
CSE1L	SAA2	KRT6B
DHX37	SREBF1	CPT1C
KPNB1	PPIB	GPR87
PTX3	NINJ1	CTSH
ITGB2	GPX2	PTK6
NMT2	ALDH3B1	CEACAM1
IFRD2	RALGDS	IL15RA
SNORA71C	AKR1A1	MUC20
AIF1L	TRANK1	SCNN1G
NANOS1	ODF3B	CASTOR3
TRNP1	CTSD	NCOA7
AMOTL2	APOL1	SEMA3B
AKT3	PER3	TINAGL1
BMPER	TMSB4X	PSCA
MRPL37	S100A6	B4GALT5
POLA2	MAGED2	OR2A7
CYP24A1	TRPS1	CYP4F11
SURF2	TM4SF19	RPS4Y1
TNFRSF10D	ANXA4	PARP9
FOSL1	ARSA	CXCL16
FSD1	MT1X	ESPN
TRIP13	DNASE1L1	SDCBP2
USP1	TIMP1	PLAUR
USP37	TMEM63B	DHRS3
RBL1	PCSK9	SPAG4
DGCR11	APOBEC3F	THEMIS2
HEATR1	HSPG2	GJB4
TEAD4	DEPP1	CTSF
FANCD2	PRNP	KRT6A
PARP1	INSIG1	GCNT1
IGFL1	TRIM5	SERPINA5
POLR3B	HIST2H2BE	TMC7
DHX9	BLVRB	TXNIP
DARS2	TOB1	STAT1
SLC7A2	IVD	RAP2B
CDC25A	SAT1	FAM131A
XRCC2	TEF	DISP3
SPINDOC	MVP	TMEM154
	TCEAL9	FGFBP1
	TRPM4	DYRK1B
	SPRR1B	MMP9
	LTB4R	RNF213
	ZP3	SLC39A6
	CERS4	CD14
	AMTN
	PIK3IP1
