# Supplementary material for: Genome-wide CRISPR screens of oral squamous cell carcinoma reveal fitness genes in the Hippo pathway
Source: eLife. 2020 Sep 29;9:e57761. doi: 10.7554/eLife.57761 (PMC7591259; doi:10.7554/eLife.57761)
Supplement: Supplementary file 7. [file elife-57761-supp7.xlsx]

## Sheet: Description
Supplementary file 7 - GSEA enrichment analysis on cancer hallmarks for cell lines and OSCC tumors.
This data file contains 3 tabs
Tab 1	Hallmarks_YAP1-dependent cell lines and 41 core YAP1-dependent OSCC tumors
Tab 2	Hallmarks_WWTR1-dependent cell lines and 30 core WWTR1-dependent OSCC tumors
Tab 3	Hallmarks-Compensable cell lines and 34 core compensable OSCC tumors

## Sheet: Hallmarks_YAP1-dep OSCC
3 YAP1-dependent OSCC cell lines												41 core YAP1-dependent OSCC tumors
NAME	SIZE	ES	NES	NOM p-val	FDR q-val	FWER p-val	RANK AT MAX	LEADING EDGE				NAME	SIZE	ES	NES	NOM p-val	FDR q-val	FWER p-val	RANK AT MAX	LEADING EDGE
HALLMARK_E2F_TARGETS	200	0.649354	3.17552	0	0	0	2932	tags=66%, list=22%, signal=83%				HALLMARK_E2F_TARGETS	189	0.838559	3.70676	0	0	0	1902	tags=78%, list=9%, signal=85%
HALLMARK_G2M_CHECKPOINT	195	0.639485	3.10553	0	0	0	3120	tags=65%, list=23%, signal=83%				HALLMARK_G2M_CHECKPOINT	186	0.789943	3.49974	0	0	0	2403	tags=68%, list=12%, signal=76%
HALLMARK_MYC_TARGETS_V1	199	0.620405	3.01876	0	0	0	2938	tags=57%, list=22%, signal=72%				HALLMARK_MYC_TARGETS_V1	191	0.750055	3.33814	0	0	0	3369	tags=69%, list=16%, signal=82%
HALLMARK_MYC_TARGETS_V2	58	0.660222	2.64489	0	0	0	2529	tags=60%, list=19%, signal=74%				HALLMARK_MYC_TARGETS_V2	58	0.798541	2.93286	0	0	0	3230	tags=83%, list=16%, signal=98%
HALLMARK_MITOTIC_SPINDLE	193	0.391544	1.91725	0	0.000310017	0.004	3271	tags=40%, list=24%, signal=53%				HALLMARK_MITOTIC_SPINDLE	196	0.588157	2.60977	0	0	0	2862	tags=39%, list=14%, signal=45%
HALLMARK_SPERMATOGENESIS	61	0.435574	1.77085	0.00176056	0.00170726	0.024	2797	tags=41%, list=21%, signal=52%				HALLMARK_MTORC1_SIGNALING	195	0.482052	2.12822	0	0	0	3394	tags=38%, list=17%, signal=45%
HALLMARK_DNA_REPAIR	145	0.270044	1.26241	0.0644567	0.130099	0.9	3579	tags=31%, list=27%, signal=42%				HALLMARK_DNA_REPAIR	139	0.493086	2.11551	0	0	0	2638	tags=32%, list=13%, signal=37%
HALLMARK_UV_RESPONSE_UP	137	0.248162	1.13696	0.204797	0.285768	0.996	1988	tags=20%, list=15%, signal=24%				HALLMARK_SPERMATOGENESIS	134	0.46608	1.9843	0	0	0	3608	tags=29%, list=18%, signal=35%
HALLMARK_UNFOLDED_PROTEIN_RESPONSE	110	0.235091	1.03533	0.403846	0.458944	1	3616	tags=36%, list=27%, signal=49%				HALLMARK_UNFOLDED_PROTEIN_RESPONSE	108	0.435638	1.76784	0	0.000522473	0.011	3484	tags=33%, list=17%, signal=40%
HALLMARK_PI3K_AKT_MTOR_SIGNALING	87	0.228638	0.982806	0.49654	0.542872	1	3013	tags=26%, list=23%, signal=34%				HALLMARK_ANDROGEN_RESPONSE	96	0.330561	1.34039	0.0497738	0.0688103	0.817	4592	tags=34%, list=22%, signal=44%
HALLMARK_UV_RESPONSE_DN	125	0.192057	0.877854	0.730483	0.740009	1	3231	tags=27%, list=24%, signal=36%				HALLMARK_GLYCOLYSIS	195	0.259181	1.16297	0.174387	0.246936	0.997	3897	tags=25%, list=19%, signal=31%
												HALLMARK_UV_RESPONSE_UP	154	0.256108	1.1054	0.272727	0.326476	1	1865	tags=15%, list=9%, signal=16%
												HALLMARK_PI3K_AKT_MTOR_SIGNALING	104	0.227057	0.913812	0.628882	0.747635	1	2998	tags=19%, list=15%, signal=22%
												HALLMARK_PROTEIN_SECRETION	95	0.220148	0.877276	0.713636	0.783217	1	4647	tags=28%, list=23%, signal=37%
												HALLMARK_PANCREAS_BETA_CELLS	40	0.187947	0.651797	0.955	0.989337	1	7198	tags=43%, list=35%, signal=65%

## Sheet: Hallmark_WWTR1-dep OSCC
3 WWTR1-dependent OSCC cell lines													30 core WWTR1-dependent OSCC tumors
NAME	SIZE	ES	NES	NOM p-val	FDR q-val	FWER p-val	RANK AT MAX	LEADING EDGE					NAME	SIZE	ES	NES	NOM p-val	FDR q-val	FWER p-val	RANK AT MAX	LEADING EDGE
HALLMARK_INTERFERON_ALPHA_RESPONSE	93	0.814583	3.68352	0	0	0	2181	tags=88%, list=16%, signal=105%					HALLMARK_INTERFERON_ALPHA_RESPONSE	92	0.856727	4.12414	0	0	0	1630	tags=76%, list=8%, signal=82%
HALLMARK_INTERFERON_GAMMA_RESPONSE	164	0.680631	3.37754	0	0	0	1684	tags=57%, list=13%, signal=65%					HALLMARK_INTERFERON_GAMMA_RESPONSE	197	0.69192	3.85674	0	0	0	2135	tags=55%, list=10%, signal=61%
HALLMARK_INFLAMMATORY_RESPONSE	129	0.539921	2.57349	0	0	0	2721	tags=48%, list=20%, signal=60%					HALLMARK_ALLOGRAFT_REJECTION	199	0.48677	2.87507	0	0	0	2840	tags=40%, list=14%, signal=46%
HALLMARK_TNFA_SIGNALING_VIA_NFKB	182	0.426572	2.15102	0	0	0	2817	tags=42%, list=21%, signal=52%					HALLMARK_P53_PATHWAY	194	0.458569	2.54264	0	0	0	3367	tags=38%, list=16%, signal=45%
HALLMARK_ESTROGEN_RESPONSE_LATE	160	0.424862	2.09581	0	0	0	2606	tags=35%, list=20%, signal=43%					HALLMARK_TNFA_SIGNALING_VIA_NFKB	196	0.416613	2.26186	0	0	0	2830	tags=33%, list=14%, signal=38%
HALLMARK_IL2_STAT5_SIGNALING	146	0.403966	1.98424	0	0.000569082	0.002	2299	tags=36%, list=17%, signal=43%					HALLMARK_OXIDATIVE_PHOSPHORYLATION	182	0.407175	2.25033	0	0	0	4729	tags=49%, list=23%, signal=63%
HALLMARK_ALLOGRAFT_REJECTION	112	0.424233	1.97271	0	0.000487785	0.002	2379	tags=39%, list=18%, signal=47%					HALLMARK_INFLAMMATORY_RESPONSE	197	0.361416	1.9549	0	0	0	3178	tags=31%, list=16%, signal=37%
HALLMARK_COMPLEMENT	142	0.392421	1.90707	0	0.00117749	0.005	2361	tags=34%, list=18%, signal=41%					HALLMARK_IL6_JAK_STAT3_SIGNALING	86	0.393995	1.92579	0	0.000659898	0.001	1570	tags=27%, list=8%, signal=29%
HALLMARK_APOPTOSIS	143	0.387464	1.89125	0	0.00104666	0.005	2639	tags=34%, list=20%, signal=42%					HALLMARK_COMPLEMENT	194	0.32717	1.74524	0	0.00263959	0.004	2408	tags=27%, list=12%, signal=30%
HALLMARK_P53_PATHWAY	187	0.372481	1.85707	0	0.00124338	0.007	2602	tags=34%, list=19%, signal=42%					HALLMARK_APOPTOSIS	159	0.320091	1.72847	0	0.00237563	0.004	3463	tags=35%, list=17%, signal=41%
HALLMARK_CHOLESTEROL_HOMEOSTASIS	67	0.429249	1.82294	0	0.00164772	0.01	2161	tags=31%, list=16%, signal=37%					HALLMARK_CHOLESTEROL_HOMEOSTASIS	73	0.359261	1.71676	0	0.00215967	0.004	3422	tags=33%, list=17%, signal=39%
HALLMARK_ESTROGEN_RESPONSE_EARLY	163	0.356384	1.77316	0	0.00243472	0.016	3102	tags=40%, list=23%, signal=52%					HALLMARK_ESTROGEN_RESPONSE_LATE	196	0.292299	1.62138	0	0.00728245	0.012	2914	tags=28%, list=14%, signal=32%
HALLMARK_APICAL_SURFACE	30	0.471751	1.68238	0.0134831	0.00549583	0.043	2419	tags=40%, list=18%, signal=49%					HALLMARK_UV_RESPONSE_UP	154	0.298773	1.59332	0	0.00746676	0.014	1926	tags=23%, list=9%, signal=25%
HALLMARK_COAGULATION	88	0.370592	1.67931	0.00248756	0.00522629	0.044	2228	tags=33%, list=17%, signal=39%					HALLMARK_REACTIVE_OXYGEN_SPECIES_PATHWAY	45	0.364056	1.54677	0	0.00988725	0.021	5110	tags=47%, list=25%, signal=62%
HALLMARK_KRAS_SIGNALING_DN	94	0.368052	1.66992	0	0.00517648	0.046	1754	tags=27%, list=13%, signal=30%					HALLMARK_PEROXISOME	101	0.287578	1.4723	0	0.0180337	0.04	3120	tags=31%, list=15%, signal=36%
HALLMARK_KRAS_SIGNALING_UP	131	0.33484	1.60201	0	0.00958625	0.083	2303	tags=31%, list=17%, signal=37%					HALLMARK_ESTROGEN_RESPONSE_EARLY	192	0.217437	1.22977	0.0714286	0.126877	0.259	2914	tags=23%, list=14%, signal=26%
HALLMARK_IL6_JAK_STAT3_SIGNALING	60	0.382978	1.59614	0.00943396	0.00944134	0.087	2295	tags=37%, list=17%, signal=44%					HALLMARK_APICAL_SURFACE	43	0.296321	1.21778	0.106145	0.130441	0.278	2213	tags=23%, list=11%, signal=26%
HALLMARK_MYOGENESIS	127	0.332459	1.59318	0.00263852	0.00891682	0.087	3050	tags=37%, list=23%, signal=48%					HALLMARK_PI3K_AKT_MTOR_SIGNALING	104	0.239939	1.2024	0.0714286	0.148037	0.32	3263	tags=27%, list=16%, signal=32%
HALLMARK_HYPOXIA	161	0.295186	1.46144	0.00815217	0.0270999	0.262	3327	tags=39%, list=25%, signal=51%					HALLMARK_FATTY_ACID_METABOLISM	155	0.205613	1.09824	0.227273	0.336326	0.606	3385	tags=22%, list=17%, signal=26%
HALLMARK_XENOBIOTIC_METABOLISM	138	0.297709	1.4536	0.0203046	0.0277206	0.278	2355	tags=28%, list=18%, signal=33%					HALLMARK_IL2_STAT5_SIGNALING	195	0.197478	1.08601	0.277778	0.349377	0.639	3174	tags=24%, list=15%, signal=28%
HALLMARK_APICAL_JUNCTION	149	0.285077	1.38509	0.0250627	0.0478077	0.469	3219	tags=40%, list=24%, signal=52%					HALLMARK_DNA_REPAIR	139	0.197281	1.05615	0.285714	0.407258	0.712	2969	tags=24%, list=14%, signal=28%
HALLMARK_ANDROGEN_RESPONSE	87	0.309397	1.37634	0.0452261	0.0482478	0.487	2035	tags=25%, list=15%, signal=30%					HALLMARK_ADIPOGENESIS	190	0.189035	1.0178	0.411765	0.49862	0.805	2803	tags=22%, list=14%, signal=25%
HALLMARK_HEDGEHOG_SIGNALING	23	0.395939	1.33218	0.109049	0.0647449	0.594	1760	tags=30%, list=13%, signal=35%					HALLMARK_XENOBIOTIC_METABOLISM	199	0.180147	1.00959	0.361111	0.497957	0.818	3282	tags=20%, list=16%, signal=24%
HALLMARK_BILE_ACID_METABOLISM	71	0.296507	1.28224	0.0792839	0.0923225	0.725	2813	tags=34%, list=21%, signal=43%					HALLMARK_HEME_METABOLISM	193	0.181338	1.00874	0.368421	0.479456	0.818	3569	tags=22%, list=17%, signal=27%
HALLMARK_UV_RESPONSE_UP	137	0.261509	1.27352	0.0663265	0.0942344	0.749	2547	tags=30%, list=19%, signal=37%					HALLMARK_MTORC1_SIGNALING	195	0.180061	0.975808	0.580645	0.551943	0.876	1544	tags=13%, list=8%, signal=14%
HALLMARK_PEROXISOME	86	0.271958	1.23048	0.111413	0.125581	0.859	2445	tags=28%, list=18%, signal=34%					HALLMARK_KRAS_SIGNALING_DN	189	0.169004	0.902494	0.8	0.733003	0.951	1714	tags=11%, list=8%, signal=12%
HALLMARK_TGF_BETA_SIGNALING	53	0.301389	1.22493	0.166667	0.126585	0.871	2731	tags=32%, list=20%, signal=40%
HALLMARK_WNT_BETA_CATENIN_SIGNALING	35	0.305691	1.12738	0.289673	0.240433	0.986	1760	tags=26%, list=13%, signal=30%
HALLMARK_HEME_METABOLISM	157	0.228378	1.12409	0.201031	0.236888	0.989	2740	tags=28%, list=21%, signal=35%
HALLMARK_GLYCOLYSIS	171	0.212813	1.06884	0.31856	0.320023	0.997	3123	tags=32%, list=23%, signal=41%
HALLMARK_ADIPOGENESIS	178	0.175899	0.887919	0.758621	0.724724	1	2710	tags=26%, list=20%, signal=32%

## Sheet: Hallmark_Compensable OSCC
3 Compensable OSCC cell lines												30 core WWTR1-dependent OSCC tumors
NAME	SIZE	ES	NES	NOM p-val	FDR q-val	FWER p-val	RANK AT MAX	LEADING EDGE				NAME	SIZE	ES	NES	NOM p-val	FDR q-val	FWER p-val	RANK AT MAX	LEADING EDGE
HALLMARK_OXIDATIVE_PHOSPHORYLATION	197	0.557857	2.84853	0	0	0	2277	tags=47%, list=17%, signal=56%				HALLMARK_EPITHELIAL_MESENCHYMAL_TRANSITION	194	0.709871	3.09437	0	0	0	2527	tags=55%, list=12%, signal=62%
HALLMARK_FATTY_ACID_METABOLISM	132	0.495825	2.372	0	0	0	2098	tags=39%, list=16%, signal=46%				HALLMARK_MYOGENESIS	199	0.613303	2.66938	0	0	0	5124	tags=69%, list=25%, signal=91%
HALLMARK_ADIPOGENESIS	178	0.393426	1.99032	0	0	0	2330	tags=37%, list=17%, signal=44%				HALLMARK_UV_RESPONSE_DN	136	0.55616	2.32187	0	0	0	4800	tags=56%, list=23%, signal=72%
HALLMARK_REACTIVE_OXYGEN_SPECIES_PATHWAY	44	0.502054	1.96753	0	0.0007	0.001	2030	tags=39%, list=15%, signal=45%				HALLMARK_ANGIOGENESIS	36	0.669183	2.20716	0	0	0	2731	tags=42%, list=13%, signal=48%
HALLMARK_XENOBIOTIC_METABOLISM	138	0.398613	1.93183	0	0.0013985	0.003	1832	tags=32%, list=14%, signal=37%				HALLMARK_COAGULATION	136	0.444357	1.86108	0	0.000430157	0.003	3399	tags=34%, list=17%, signal=40%
HALLMARK_BILE_ACID_METABOLISM	71	0.425621	1.85555	0	0.00249573	0.008	3766	tags=52%, list=28%, signal=72%				HALLMARK_KRAS_SIGNALING_UP	194	0.421223	1.85301	0	0.000358464	0.003	3929	tags=36%, list=19%, signal=44%
HALLMARK_PROTEIN_SECRETION	93	0.396395	1.81013	0	0.00213919	0.008	2034	tags=28%, list=15%, signal=33%				HALLMARK_HEDGEHOG_SIGNALING	35	0.537217	1.75802	0.00449102	0.00145292	0.014	4000	tags=54%, list=20%, signal=67%
HALLMARK_EPITHELIAL_MESENCHYMAL_TRANSITION	167	0.361399	1.80982	0	0.0018718	0.008	2579	tags=37%, list=19%, signal=45%				HALLMARK_APICAL_JUNCTION	194	0.361488	1.59708	0	0.0100899	0.109	4003	tags=31%, list=20%, signal=38%
HALLMARK_PEROXISOME	86	0.386575	1.75672	0	0.0022219	0.011	2870	tags=41%, list=21%, signal=52%				HALLMARK_HYPOXIA	190	0.349062	1.52521	0.00125313	0.0183803	0.213	5078	tags=35%, list=25%, signal=46%
HALLMARK_CHOLESTEROL_HOMEOSTASIS	67	0.377754	1.6164	0	0.0115745	0.07	2720	tags=39%, list=20%, signal=48%				HALLMARK_WNT_BETA_CATENIN_SIGNALING	42	0.448051	1.52007	0.0181543	0.0174665	0.224	2768	tags=31%, list=14%, signal=36%
HALLMARK_MTORC1_SIGNALING	194	0.305401	1.57952	0	0.0145435	0.097	2104	tags=26%, list=16%, signal=31%				HALLMARK_NOTCH_SIGNALING	32	0.434412	1.41588	0.0603715	0.0471145	0.52	3659	tags=38%, list=18%, signal=46%
HALLMARK_ANGIOGENESIS	28	0.446963	1.5549	0.0298851	0.0159389	0.114	2759	tags=57%, list=21%, signal=72%				HALLMARK_KRAS_SIGNALING_DN	189	0.301417	1.32877	0.0280612	0.105825	0.834	6573	tags=43%, list=32%, signal=63%
HALLMARK_COAGULATION	88	0.319485	1.44774	0.0160858	0.038808	0.266	1896	tags=28%, list=14%, signal=33%				HALLMARK_TGF_BETA_SIGNALING	54	0.370312	1.31694	0.102526	0.108331	0.864	3660	tags=31%, list=18%, signal=38%
HALLMARK_GLYCOLYSIS	171	0.279743	1.39246	0.0182927	0.0580783	0.384	2540	tags=30%, list=19%, signal=37%				HALLMARK_BILE_ACID_METABOLISM	112	0.304582	1.23922	0.112	0.198291	0.982	5611	tags=32%, list=27%, signal=44%
HALLMARK_HYPOXIA	161	0.268562	1.34583	0.017301	0.0806297	0.53	2472	tags=31%, list=19%, signal=38%				HALLMARK_PROTEIN_SECRETION	95	0.307074	1.21518	0.133053	0.223952	0.997	4813	tags=28%, list=23%, signal=37%
HALLMARK_KRAS_SIGNALING_DN	94	0.289079	1.33348	0.0434783	0.0823431	0.563	2529	tags=35%, list=19%, signal=43%				HALLMARK_IL2_STAT5_SIGNALING	195	0.274455	1.20079	0.112346	0.233565	0.997	3501	tags=26%, list=17%, signal=31%
HALLMARK_UNFOLDED_PROTEIN_RESPONSE	110	0.276727	1.30501	0.0480226	0.095673	0.649	3093	tags=35%, list=23%, signal=46%				HALLMARK_HEME_METABOLISM	193	0.272924	1.19189	0.139949	0.234345	0.997	5412	tags=32%, list=26%, signal=43%
HALLMARK_APOPTOSIS	143	0.253336	1.23201	0.0798722	0.153771	0.83	2243	tags=27%, list=17%, signal=32%				HALLMARK_ESTROGEN_RESPONSE_EARLY	192	0.266495	1.16938	0.160602	0.257685	0.998	3349	tags=24%, list=16%, signal=28%
HALLMARK_HEME_METABOLISM	157	0.245948	1.22165	0.0849057	0.157689	0.853	3003	tags=30%, list=22%, signal=38%				HALLMARK_ADIPOGENESIS	190	0.265006	1.16218	0.174129	0.256607	0.999	4814	tags=30%, list=23%, signal=39%
HALLMARK_UV_RESPONSE_DN	125	0.253013	1.18707	0.15	0.193108	0.927	2523	tags=30%, list=19%, signal=36%				HALLMARK_COMPLEMENT	194	0.264559	1.15516	0.170213	0.254877	0.999	2948	tags=21%, list=14%, signal=24%
HALLMARK_MYOGENESIS	127	0.249575	1.18562	0.121951	0.185871	0.928	2607	tags=28%, list=20%, signal=34%				HALLMARK_PANCREAS_BETA_CELLS	40	0.331242	1.13376	0.278034	0.279402	1	7135	tags=45%, list=35%, signal=69%
HALLMARK_APICAL_SURFACE	30	0.328682	1.16142	0.26747	0.211531	0.955	789	tags=20%, list=6%, signal=21%				HALLMARK_XENOBIOTIC_METABOLISM	199	0.23022	1.01587	0.427509	0.527311	1	5194	tags=30%, list=25%, signal=40%
HALLMARK_P53_PATHWAY	187	0.208638	1.06389	0.285714	0.383825	0.995	1548	tags=18%, list=12%, signal=20%				HALLMARK_APICAL_SURFACE	43	0.258549	0.891863	0.647779	0.822759	1	1774	tags=12%, list=9%, signal=13%
HALLMARK_COMPLEMENT	142	0.212022	1.02889	0.383954	0.448904	0.997	1901	tags=23%, list=14%, signal=26%				HALLMARK_INFLAMMATORY_RESPONSE	197	0.184716	0.804977	0.904938	0.979892	1	5712	tags=34%, list=28%, signal=46%
HALLMARK_APICAL_JUNCTION	149	0.204324	1.0087	0.41195	0.483054	0.999	754	tags=10%, list=6%, signal=11%				HALLMARK_FATTY_ACID_METABOLISM	155	0.189614	0.803894	0.898684	0.942432	1	6088	tags=35%, list=30%, signal=49%
HALLMARK_HEDGEHOG_SIGNALING	23	0.293184	0.967999	0.473418	0.568449	1	2423	tags=30%, list=18%, signal=37%				HALLMARK_PEROXISOME	101	0.182638	0.738209	0.944915	0.986402	1	5228	tags=29%, list=26%, signal=38%
HALLMARK_NOTCH_SIGNALING	28	0.258327	0.922496	0.578049	0.66894	1	3068	tags=43%, list=23%, signal=56%				HALLMARK_IL6_JAK_STAT3_SIGNALING	86	0.173097	0.668863	0.970972	0.985577	1	5740	tags=31%, list=28%, signal=43%
HALLMARK_TGF_BETA_SIGNALING	53	0.163306	0.663213	0.979487	0.986904	1	3327	tags=28%, list=25%, signal=38%
