# Supplementary material for: Genome-wide CRISPR screens of oral squamous cell carcinoma reveal fitness genes in the Hippo pathway
Source: eLife. 2020 Sep 29;9:e57761. doi: 10.7554/eLife.57761 (PMC7591259; doi:10.7554/eLife.57761)
Supplement: Supplementary file 9. [file elife-57761-supp9.xlsx]

## Sheet: Supplementary file 9
Supplementary file 9 - List of primers
Name	Sequence	Purpose
gLibrary-HiSeq_50bp-SE-U1-F	ACACTCTTTCCCTACACGACGCTCTTCCGATCTCTTGTGGAAAGGACGAAACA	Library preparation
gLibrary-HiSeq_50bp-SE-U1-R	TCGGCATTCCTGCTGAACCGCTCTTCCGATCTCTAAAGCGCATGCTCCAGAC	Library preparation
PE 1.0 p5 Top_PE_C	AATGATACGGCGACCACCGAGATCTACACTCTTTCCCTACACGACGCTCTTCCGATC*T	Library preparation
U6-Illumina-seq2	TCTTCCGATCTCTTGTGGAAAGGACGAAACACCG	Next-generation sequencing
Index sequencing primer	AAGAGCGGTTCAGCAGGAATGCCGAGACCGATCTC	Next-generation sequencing
PKLV2_SEQ	AGATAATTAGAATTAATTTGACTG	Sanger sequencing
YAP1_Forward	CGCTCTTCAACGCCGTCA	RT- qPCR
YAP1_Reverse	AGTACTGGCCTGTCGGGAGT	RT- qPCR
WWTR1_Forward	ATTCGAATGCGCCAAGAG	RT- qPCR
WWTR1_Reverse	AACTGGGGCAAGAGTCTCAG	RT- qPCR
CTGF_Forward	GTTTGGCCCAGACCCAACTA	RT- qPCR
CTGF_Reverse	GGCTCTGCTTCTCTAGCCTG	RT- qPCR
CYR61_Forward	CAGGACTGTGAAGATGCGGT	RT- qPCR
CYR61_Reverse	GCCTGTAGAAGGGAAACGCT	RT- qPCR
RPL13_Forward	CTTTCCGCTCGGCTGTTTTC	RT- qPCR
RPL13_Reverse	GCCTTACGTCTGCGGATCTT	RT- qPCR
