# Supplementary material for: Genome-wide CRISPR screens of oral squamous cell carcinoma reveal fitness genes in the Hippo pathway
Source: eLife. 2020 Sep 29;9:e57761. doi: 10.7554/eLife.57761 (PMC7591259; doi:10.7554/eLife.57761)
Supplement: Supplementary file 10. [file elife-57761-supp10.xlsx]

## Sheet: Supplementary file 10
Supplementary file 10 - Quality assessment of the genome-wide CRISPR-Cas9 screen.
OSCC Cell lines	Precision Recall	Average Pearson Correlation
ORL-48	0.923	0.76
ORL-115	0.924	0.731
ORL-136	0.931	0.919
ORL-150	0.924	0.858
ORL-153	0.925	0.903
ORL-156	0.922	0.603
ORL-166	0.921	0.787
ORL-174	0.923	0.879
ORL-188	0.922	0.859
ORL-195	0.933	0.916
ORL-204	0.919	0.749
ORL-207	0.929	0.919
ORL-214	0.921	0.816
ORL-215	0.921	0.911
BICR10	0.926	0.879
Ho-1-u-1	0.924	0.782
HSC-2	0.933	0.885
HSC-4	0.931	0.895
PE/CA-PJ15	0.931	0.89
SAS	0.923	0.905
SCC-9	0.921	0.69
*Precision recall is a measure of the ability of the screen in distinguishing the Traver Hart’s pre-defined core essential genes from the non-essential genes.
^Pearson correlation scores were calculated by comparing the CRISPRcleanR-corrected log fold changes of all sgRNA across the triplicate screens.
