# Supplementary material for: Genome-wide CRISPR screens of oral squamous cell carcinoma reveal fitness genes in the Hippo pathway
Source: eLife. 2020 Sep 29;9:e57761. doi: 10.7554/eLife.57761 (PMC7591259; doi:10.7554/eLife.57761)
Supplement: Supplementary file 11. [file elife-57761-supp11.xlsx]

## Sheet: Supplementary file 11
Supplementary file 11 - List of sgRNA and their sequences.
Target gene	Name of oligonucleotide	Sequence	Abbreviation of sgRNA	Catalogue number/Company
PLK1	PLK1_sg1_top	CACCGTCGGACGCGGACACCAAGG	PLK1	IDT
	PLK1_sg1_bot	AAACCCTTGGTGTCCGCGTCCGAC
CHAT	CHAT_sg1_top	CACCGACGAGCGTTTGCCTCCAAT	CHAT	IDT
	CHAT_sg1_bot	AAACATTGGAGGCAAACGCTCGTC
Non-targeting	NT_sg1_top	CACCGGGAGGTGGCTTTAGGTTTT	NT	IDT
	NT_sg1_bot	AAACAAAACCTAAAGCCACCTCCC
YAP1	YAP1_sg1k_top	CACCGCCCACAGGGAGGCGTCAT	Y1K	IDT
	YAP1_sg1k_bot	AAACATGACGCCTCCCTGTGGGC
YAP1	YAP1_sg2b_top	CACCGTGCACGATCTGATGCCCGG	Y2B	IDT
	YAP1_sg2b_bot	AAACCCGGGCATCAGATCGTGCAC
WWTR1	WWTR1_sg1k_top	CACCGAATCCGAAGCCTAGCTCG	W1K	IDT
	WWTR1_sg1k_bot	AAACCGAGCTAGGCTTCGGATTC
WWTR1	WWTR1_sg2b_top	CACCGAGGATTCGAATGCGCCAAG	W2B	IDT
	WWTR1_sg2b_bot	AAACCTTGGCGCATTCGAATCCTC
