# Supplementary material for: Genome-wide CRISPR screens of oral squamous cell carcinoma reveal fitness genes in the Hippo pathway
Source: eLife. 2020 Sep 29;9:e57761. doi: 10.7554/eLife.57761 (PMC7591259; doi:10.7554/eLife.57761)
Supplement: Supplementary file 12. [file elife-57761-supp12.xlsx]

## Sheet: Supplementary file 12
Supplementary file 12 - List of antibodies.
Antibody	Catalogue Number	Producer	Dilution for WB
Primary
Anti-YAP (D8H1X), rabbit monoclonal	#14074	Cell Signaling Technology, Danvers, MA, USA	1: 1000
Anti-TAZ (D361D), rabbit monoclonal	#70148	Cell Signaling Technology, Danvers, MA, USA	1: 1000
Anti-actin (clone C4), mouse monoclonal	MAB1501	Merck Milipore, Massachusetts, USA	1: 5000
Secondary
Goat anti-rabbit IgG-HRP	SB4010-05	Southern Biotech (Birmingham, AL, USA)	1: 10000
Goat anti-mouse IgG-HRP	SB1010-05	Southern Biotech (Birmingham, AL, USA)	1: 10000
