# Supplementary figures and images for: Genome-wide CRISPR screens of oral squamous cell carcinoma reveal fitness genes in the Hippo pathway
Source: eLife journal article supplement (doi:10.7554/elife.57761), 2020-09-29

**A**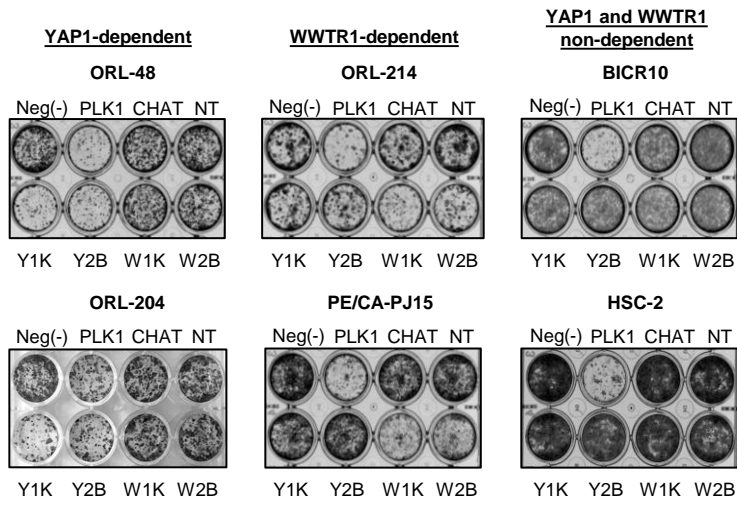**B**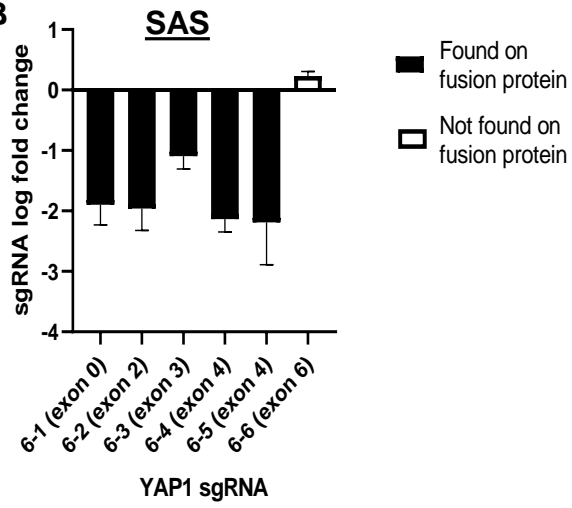**C**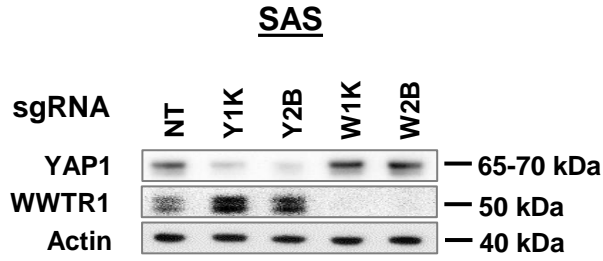**D**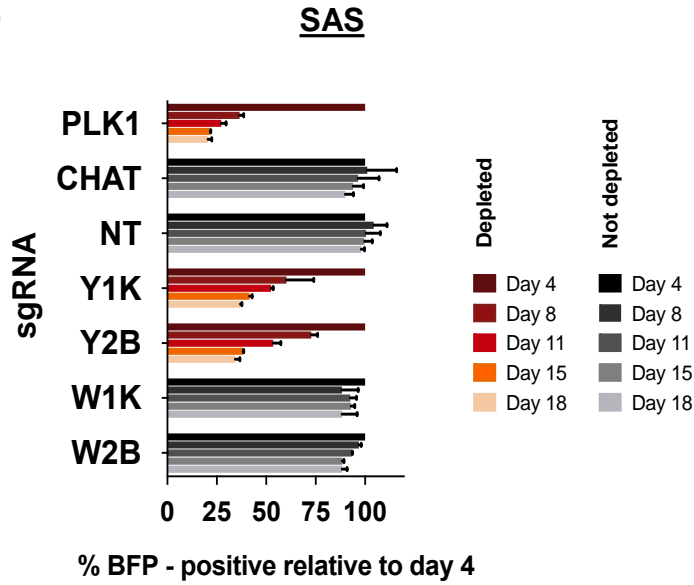**E**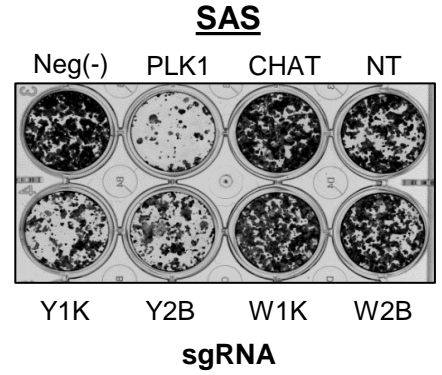**F**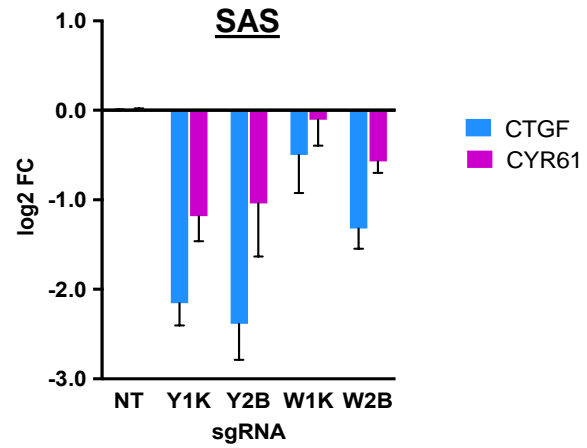

Supplement: supp [file elife-57761-supp-v1.zip]

**A**

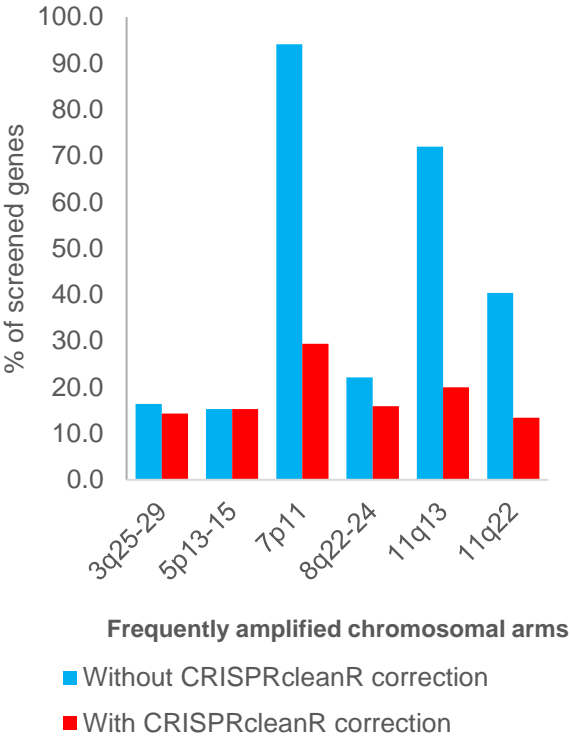

**B**

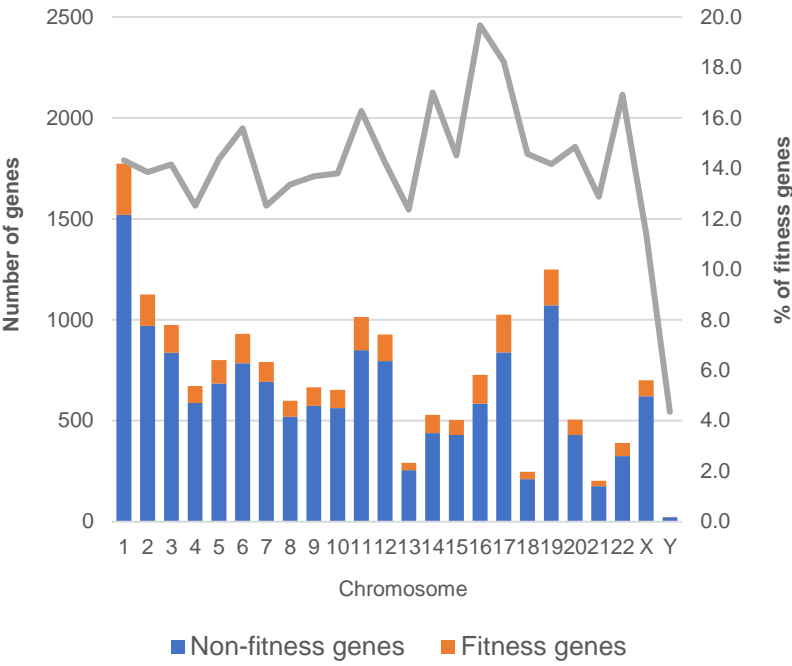

Supplement: supp [file elife-57761-supp-v1.zip]

A

Analysis workflow:

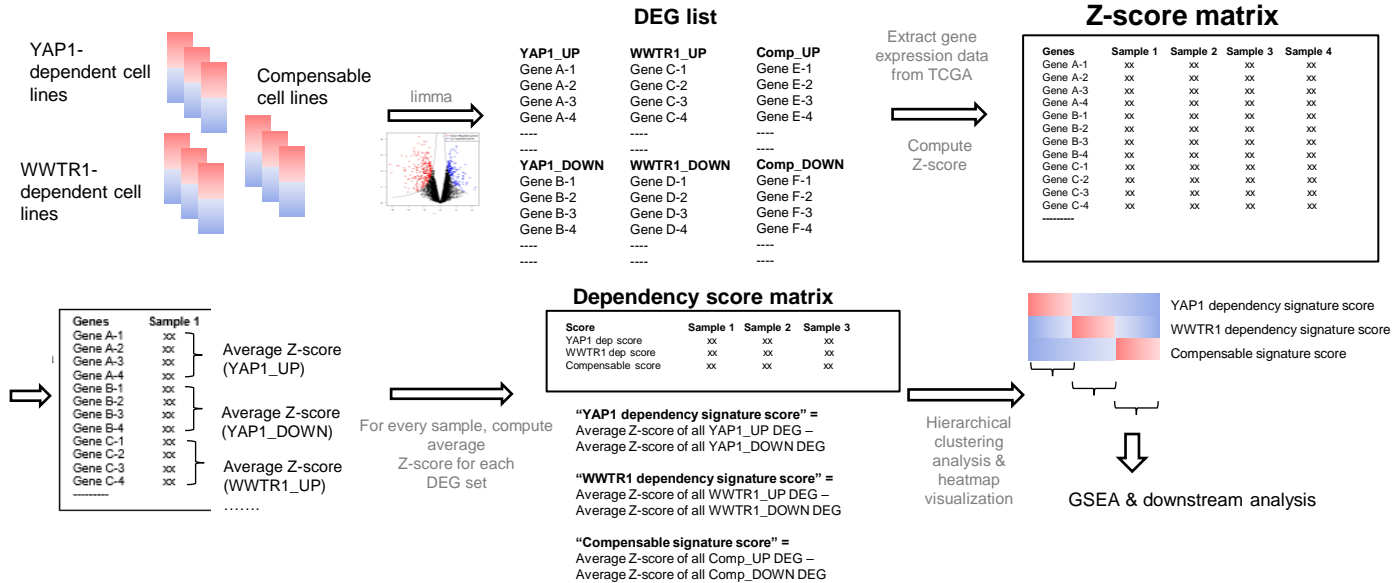

B

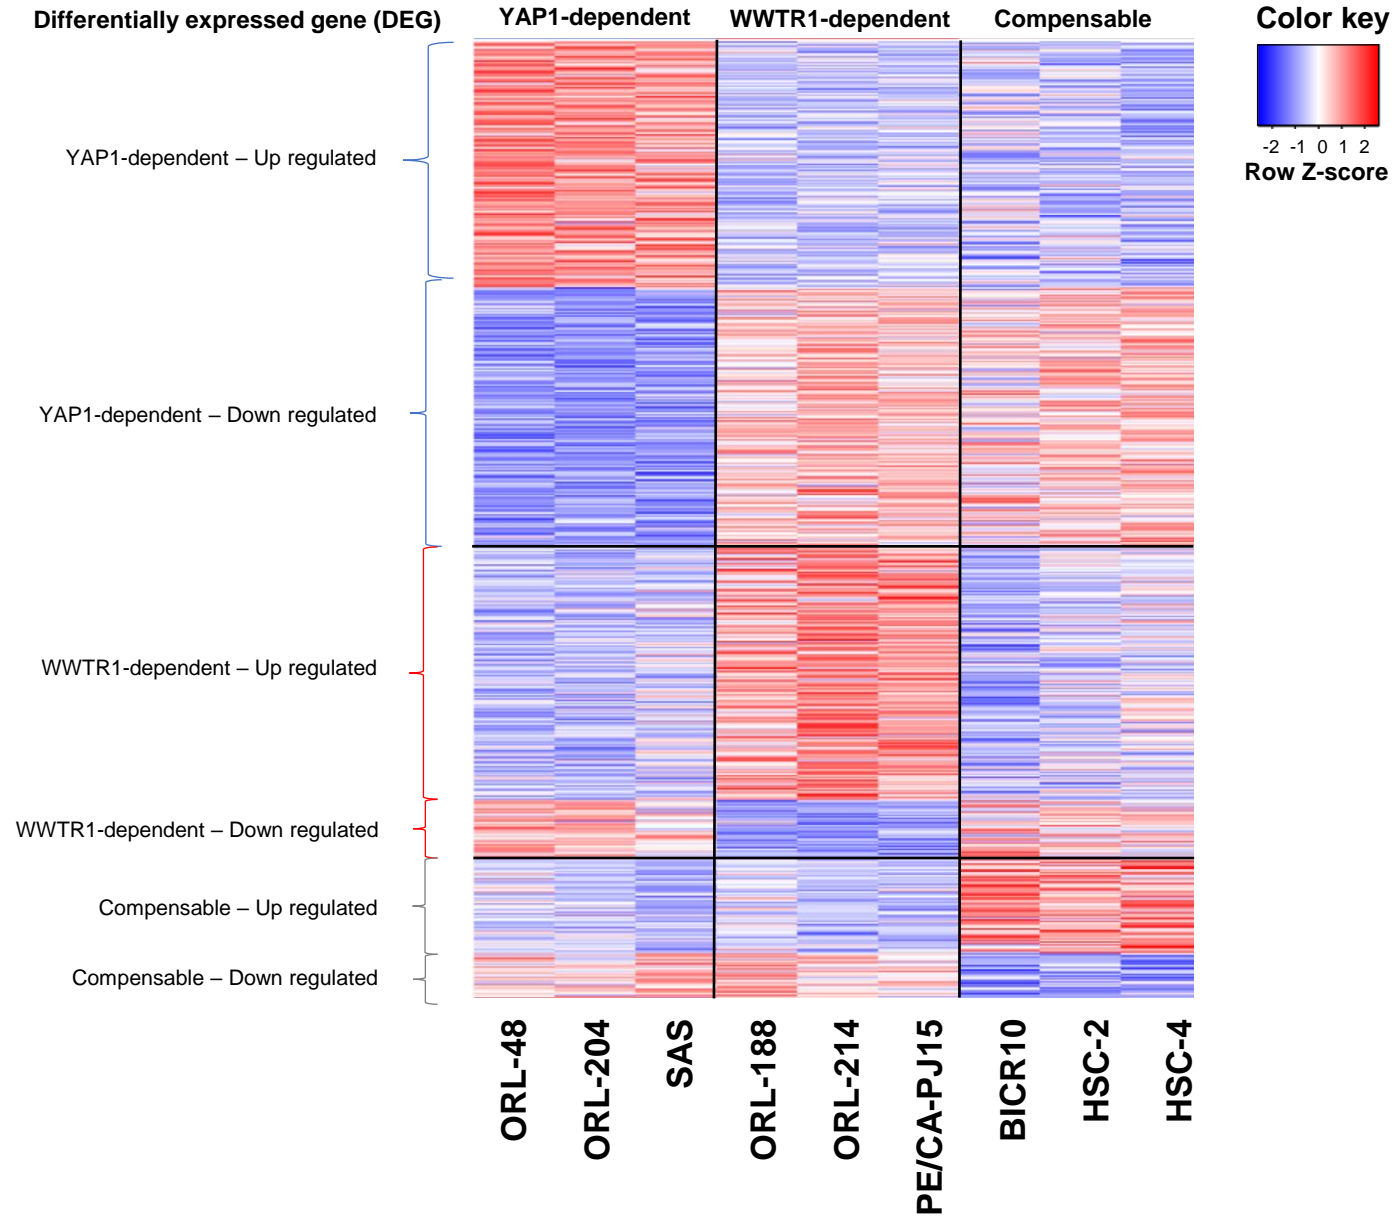

Supplement: supp [file elife-57761-supp-v1.zip]

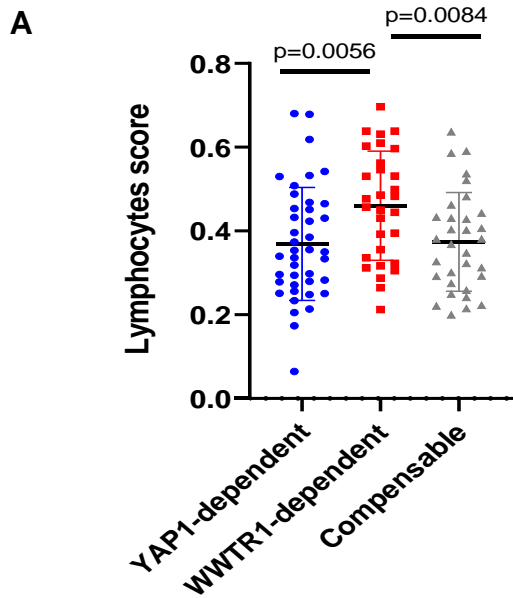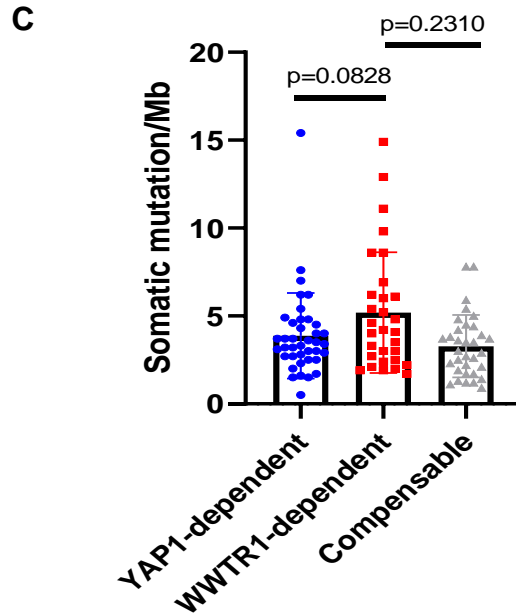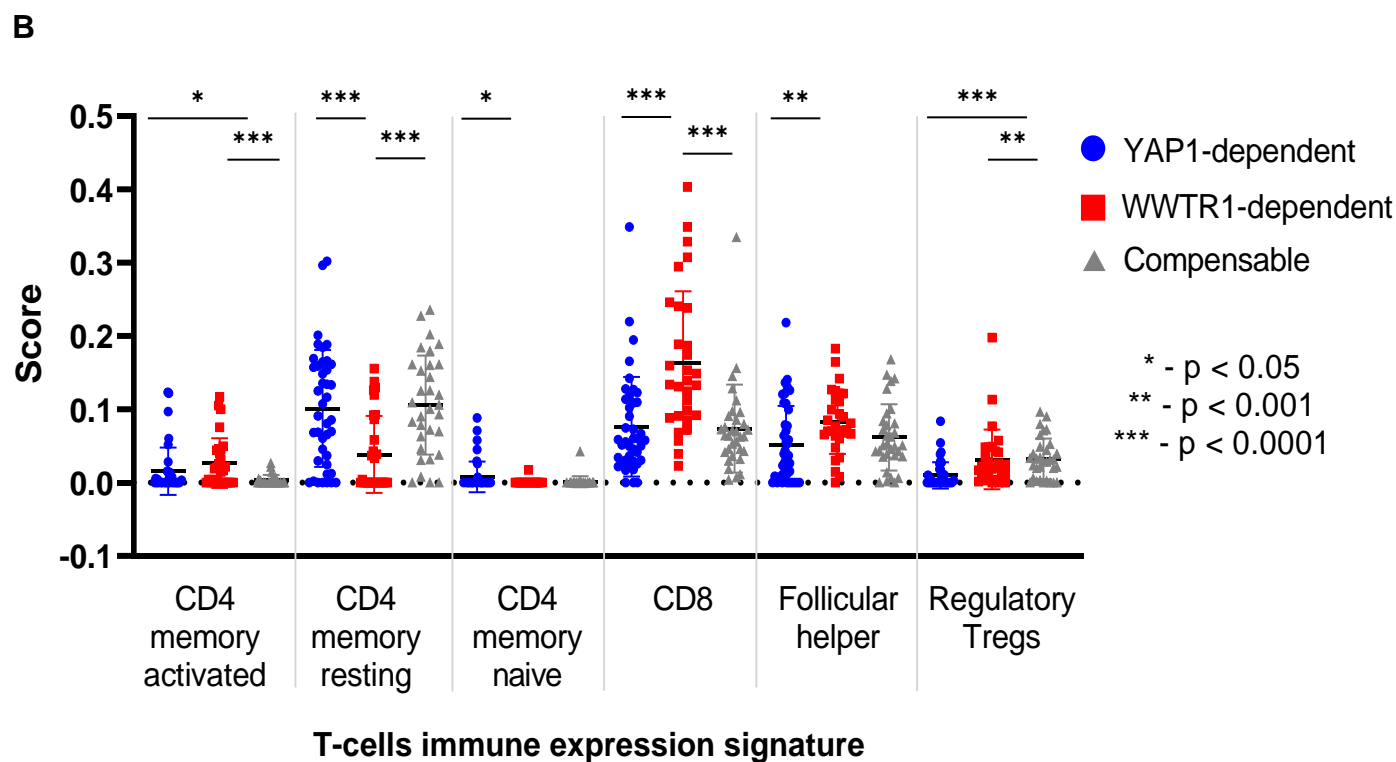

Supplement: supp [file elife-57761-supp-v1.zip]

**A**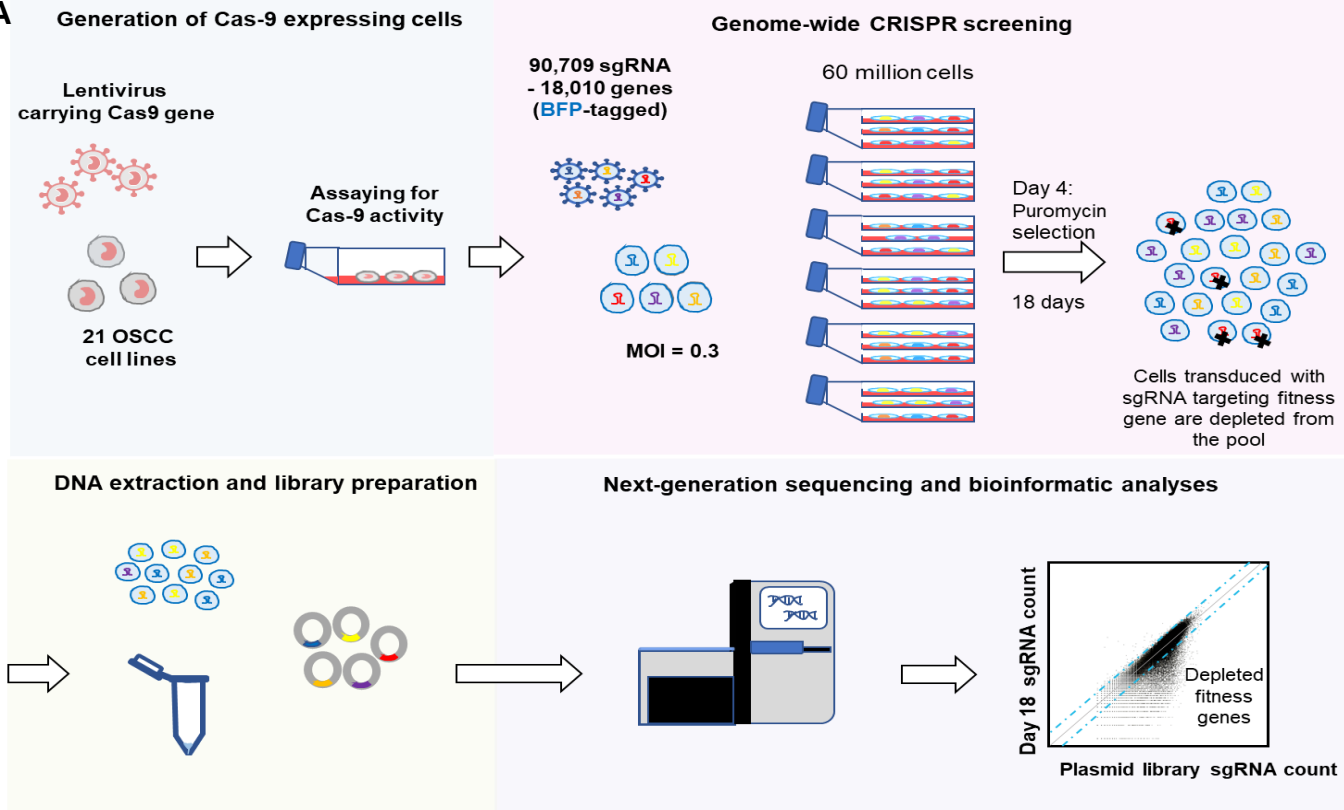**B**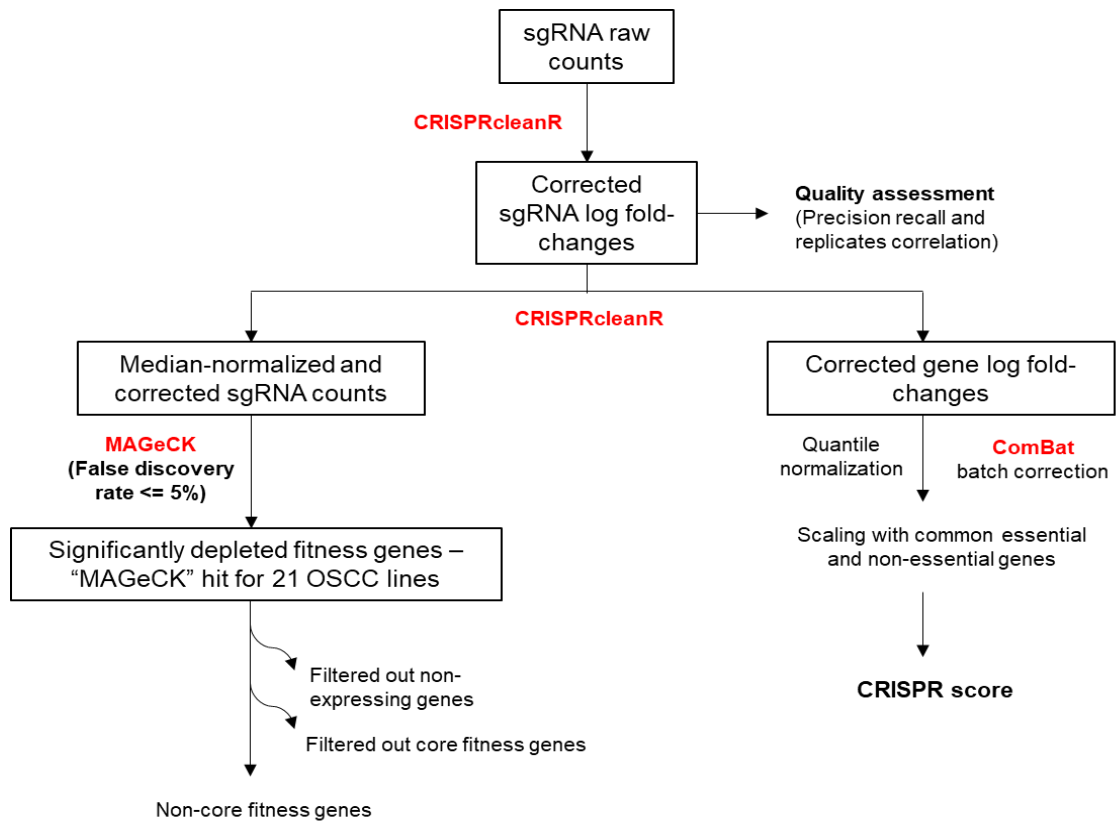

Supplement: supp [file elife-57761-supp-v1.zip]

# A

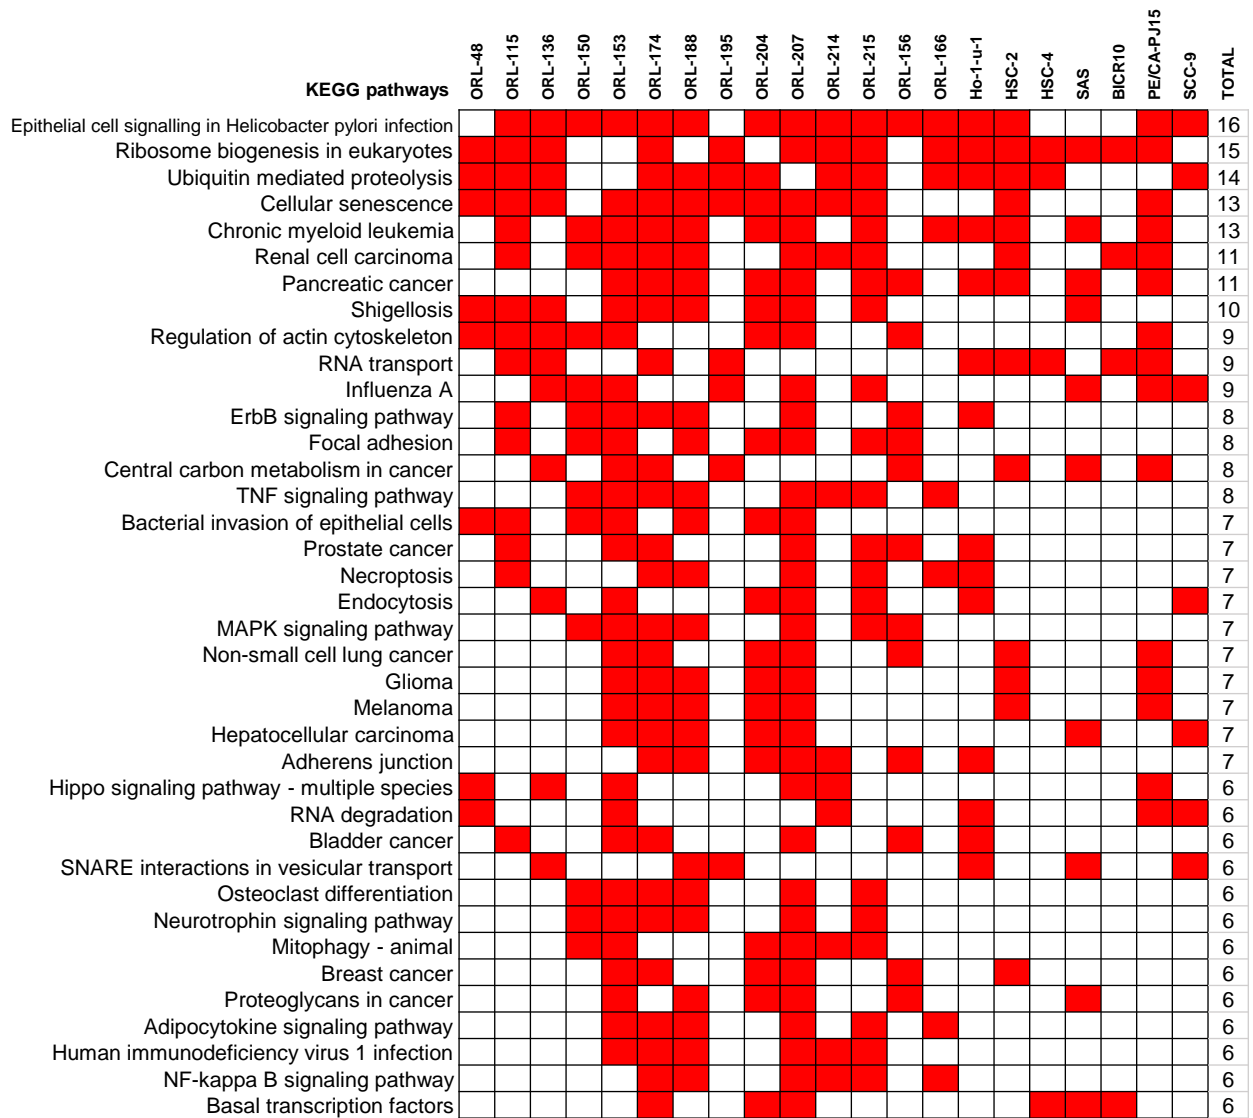

**B**

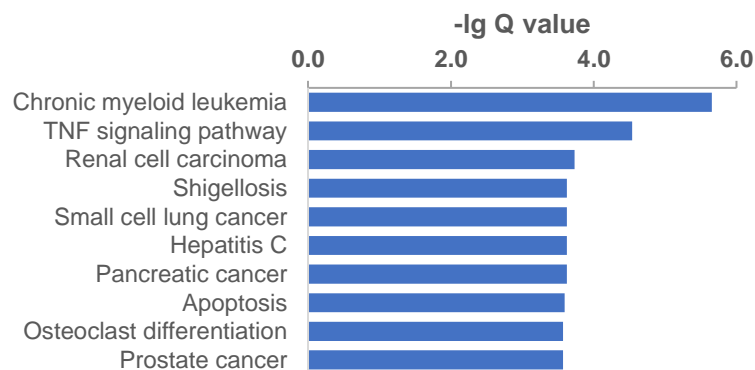

**C**

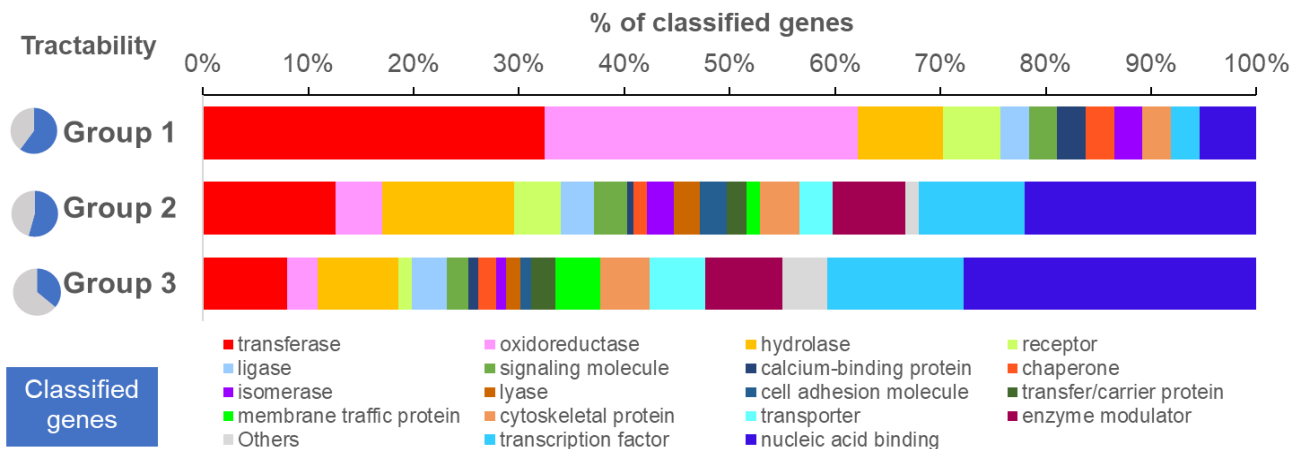

Supplement: supp [file elife-57761-supp-v1.zip]

**A**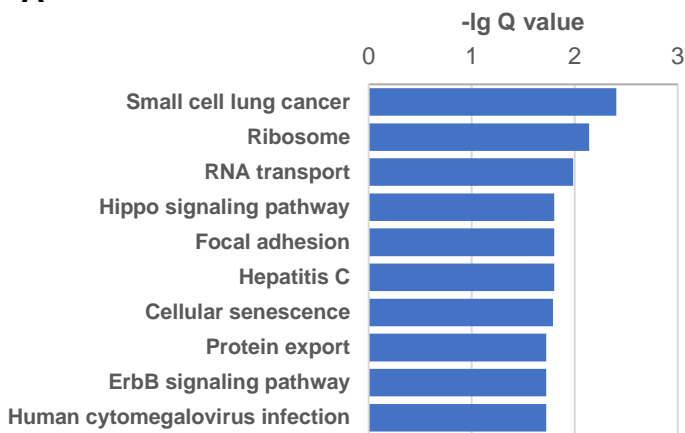**C**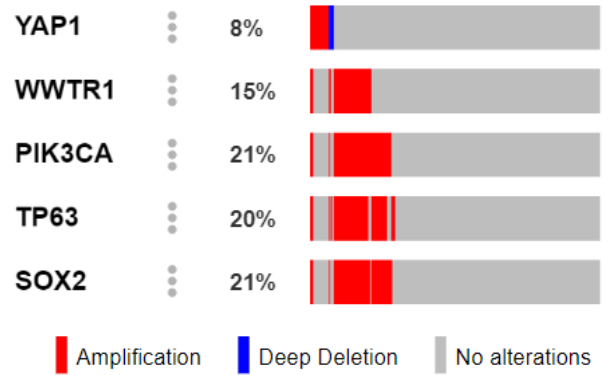**B**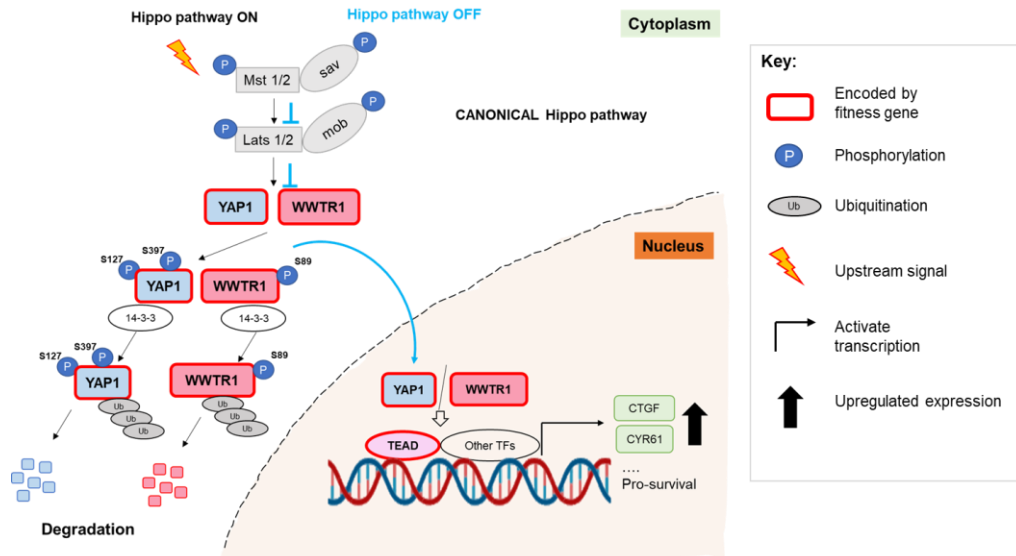**D**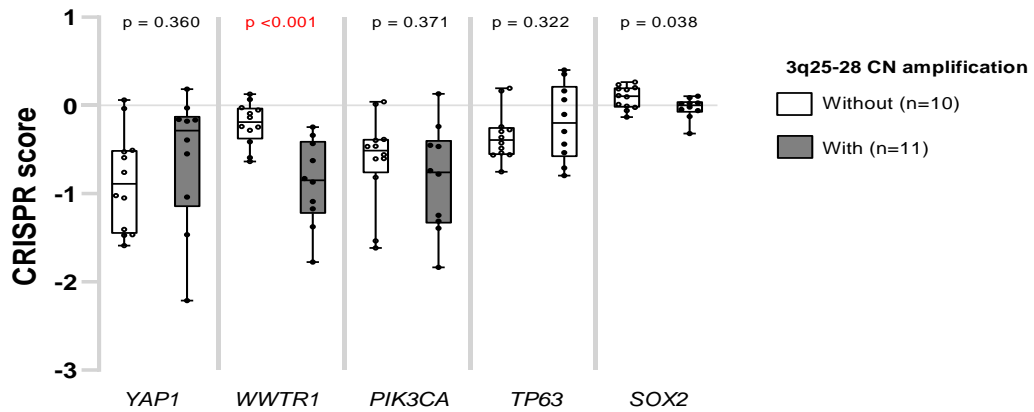**E**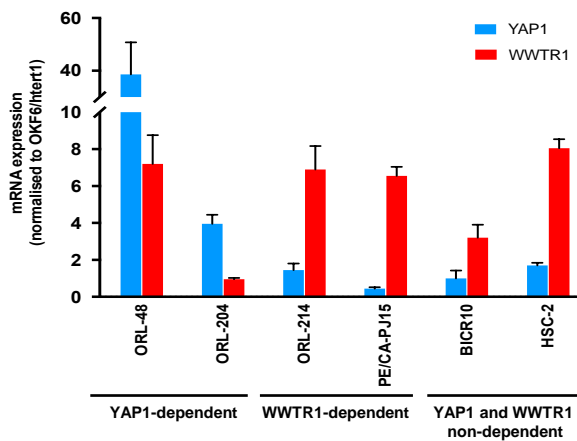**F**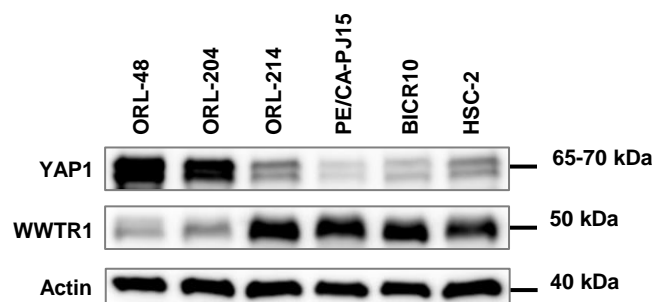

Supplement: supp [file elife-57761-supp-v1.zip]
